# Supplementary material for: Development and validation of a multi-parameter nomogram for venous thromboembolism in gastric cancer patients: a retrospective analysis
Source: PeerJ. 2024 Jun 25;12:e17527. doi: 10.7717/peerj.17527 (PMC11212615; doi:10.7717/peerj.17527)
Supplement: Supplemental Information 1 [file peerj-12-17527-s001.xlsx]

## Sheet: Sheet1
VET	Sex	age	high	weight	KPS	varicosity	cardiovasculardisease	respiratorydisease	diabetes	othertumorhistory	Bloodtransfusion	T	N	M	TNM	clinicalstage	supplementtoTNMstage	hemorrhage	lunginfection	myelosuppression	myocardialdamage	anaemia	gastroplegia	ileus	Throttleconstriction	Anastomoticfistula	chemotherapy	targeteddrug	Hormonetherapy	Immunecheckpointinhibitors#10	Vascularcatheterization	CEA	CA199	leukocytecount#10	plaletecount	erythrocyte	hemoglobin	albumin	creatinine	PT#10	APTT	fibrinogen	Fibrindegradationproducts	Ddimer	cholesterol	surgery	radiotherapy	Neoadjuvantchemotherapy	Perfusionchemotherapy
No	Mal	51	168	42	80	No	No	No	No	Yes	No	4	2	1	T4N2M1	Ⅳ		Yes	Yes	Yes	No	Yes	No	No	No		Yes	No	Yes	No	No	13.97	25.1	9.48	354	4.11	129	37.05	40.6	11.1	25	4.72	41	>10.00	3.26	No	No	No	No
No	Mal	64	165	51	90	No	No	No	No	Yes	No				T4N0M0	Ⅲ		No	No	No	No	Yes	No	No	No		Yes	No	Yes	No	No	1.54	7.38	7.83	77	3.31	104	37.99	67.3	12.1	22.9	2.2	1.7	0.53	4.45	Yes	No	No	No
No	Mal	60	175	55	90	No	No	No	No	Yes	No				T3N1M1	Ⅳ		No	No	No	No	No	No	No	No		Yes	No	Yes	No	No	17.88	33.16	4.22	115	3.91	115	40.07	68.8	12.5	25.3	1.95		0.11		Yes	No	No	No
No	Mal	66	171	68	80	No	Yes	No	No	Yes	No				T4N2M0	Ⅳ		No	No	No	No	Yes	No	No	No		Yes	No	No	No	No	3.7		4.36	151	3.93	105	37.76	88	10.6	28.3	3.86		0.17		No	No	No	No
No	Fem	60	155	62	80	No	No	No	No	Yes	No				T2N1M1	Ⅳ		No	No	No	No	No	No	No	No		No	No	Yes	No	No			5.7	392	3.97	105	34.48	51.78	12.3	26.5	3.39		1.16		No	No	No	No
No	Fem	54	162	60	90	No	No	No	No	Yes	No				T2N0M0	Ⅰ		No	No	No	No	No	No	No	No		No	No	No	No	No	0.8		4.23	120	3.81	119	44.9	48.9	12.1	33.9	2.02		0.29	3.72	No	No	No	No
No	Mal	79	185	55	80	No	Yes	No	No	No	Yes							No	No	No	No	No	No	No	No		No	No	No	No	No	1.2	7.4	5.62	155	3.97	131	44.3	89.1	13.7	33.5	3.52	3.9	0.29	3.26	No	No	No	No
No	Fem	78	150	35	60	No	Yes	No	No	No	No					Ⅳ		No	No	No	No	No	No	No	No		No	No	Yes	No	No	<0.50	10.44	12.56	281	3.81	110	30.44	58.4	12.1	22.6	3.4		1.65	4.04	No	No	No	No
No	Mal	57			60	No	Yes	No	No	Yes	No					Ⅳ		Yes	No	No	No	Yes	No	No	No		No	No	No	No	No	3.95	495.69	8.3	341	3.94	109	30.2	66.6	13	30.6	2.17	6.7	0.15	3.6	No	No	No	No
No	Fem	63	165	38.5	85	No	No	No	No	No	Yes					Ⅱ		No	No	No	No	Yes	No	No	No		No	No	No	No	No	5.7	12.17	11.91	109	2.9	99	27.04	58.2	16.4	34.8	0.78		0.79		No	No	No	No
No	Mal	50	162	55	80	No	No	No	No	Yes	No				T4N2M1	Ⅳ		No	No	No	No	Yes	No	No	No		Yes	No	Yes	No	No	>100.00		4.67	154	4.75	142	38.77	74.6	14.1	32	3.86		1.5		No	No	No	No
No	Mal	45	160	55	90	No	No	No	No	Yes	Yes				T1N0M0	Ⅰ		No	No	No	No	No	No	No	No		No	No	No	No	No	1.5	7.33	3.69	111	4.84	133	39.77	69.56	12.9	33.8	2.23	0.2	0.46	4.83	No	No	No	No
No	Fem	51	155	50	80	No	No	No	No	Yes	No				T4N1M0	Ⅲ		No	No	No	No	No	No	No	No		No	No	Yes	No	No	1.92	8.84	3.24	237	3.33	127	45.72	41.7	11.2	26	3.33		0.19	5.05	No	No	No	No
No	Mal	54	162	62	80	No	Yes	No	No	Yes	No				T3N2M0	Ⅲ		No	No	No	No	No	No	No	No		No	No	Yes	No	No	2.2		8.62	184	4.94	151	38	67.7	12	29.8	2.69		185	4.64	No	No	No	No
No	Mal	58	160	60	90	No	No	No	No	Yes	No	3	0	0	T3N0M0	Ⅲ		No	No	No	No	Yes	No	No	No		Yes	No	No	No	No	3.09	10.06	4.19	158	4.58	150	42.24	65.6	12.2	29.2	2.53	<2.50	0.19	3.67	No	No	No	No
No	Mal	64	165	58	80	No	No	Yes	No	No	No				T3N1M0	Ⅱ		No	No	No	No	No	No	No	No		No	No	Yes	No	No	2.17	15	5.29	166	4.58	124	38.18	60.5	12.5	32.3	2.98		2.8		No	No	No	No
No	Mal	81	170	74	80	No	No	No	No	Yes	No				T1N0M0	Ⅰ		No	Yes	No	No	No	No	No	No		No	No	Yes	No	No	1.4	30	3.56	81	5.1	149	44.67	69.9	12	30.4	3.59		0.47		No	No	No	No
No	Fem	55	145	41	90	No	No	No	No	Yes	No				T4N3M0	Ⅲ		No	No	No	No	No	No	No	No		Yes	No	No	No	No	1.4	99.7	3.47	112	3.12	99	32.93	43.2	13.2	29.5	4.6	2.7	0.74	3.37	No	No	No	No
No	Fem	60	153	48	80	No	No	Yes	No	Yes	No				T4N2M0	Ⅲ		No	No	Yes	No	Yes	No	No	No		Yes	No	Yes	No	Yes	2.4	61.16	6.38	241	3.88	108	31.5	63.6	12.6	28.8	3.89		1.15		No	Yes	No	No
No	Mal	73	170	64	70	No	No	No	No	Yes	No				T1N0M0	Ⅰ		No	No	No	No	No	No	No	No		No	No	No	No	No	1.4	18.16	6.2	230	5.88	130	43.35	89.5	10.9	29.7	2.86	1.4	0.24	4.58	No	No	No	No
No	Fem	70	154	45	80	No	No	No	No	Yes	No				T4N0M0	Ⅱ		No	No	No	No	Yes	No	No	No		No	No	Yes	No	No	2.41	10.55	2.84	238	4.8	95	40.43	61	11.7	25.3	2.05	1.4	0.18		No	No	No	No
No	Mal	61	170	48	60	No	No	No	No	Yes	No				TxNxM1	Ⅳ		No	No	No	No	No	No	No	No		No	No	No	No	No	4.7		5.65	176	3.23	108	28.91	55.3	14.3	31.6	1.99		224		No	No	No	No
No	Fem	58	154	54	80	No	No	No	No	Yes	No				T3N3M0	Ⅳ		No	No	Yes	No	No	No	No	No		Yes	No	Yes	No	No	>100.00		4.78	226	3.86	109	36.4	58.1							No	No	No	No
No	Fem	72	145	27	80	No	No	No	No	No	No	1	0	0	T1N0M0	Ⅰ	[pT1aN0M0]	No	No	No	No	Yes	No	No	No		No	No	No	No	No	7.98	43.28	3.99	259	2.14	89	30.5	60.8	11.5	27.7	3.62	4.1	1.23		No	No	No	No
No	Mal	80	164	60	70	No	Yes	Yes	No	Yes	No	3	0	0	T3N0M0	Ⅱ		No	No	Yes	No	Yes	No	No	No		Yes	No	No	No	No	1.7	6.61	8.39	174	4.24	132	34.57	69.5	12.3	30.9	4.15		1.28	3.69	No	No	No	No
No	Fem	57	155	51	80	No	No	No	No	No	No	1	0	0	T1N0M0	Ⅰ		No	No	No	No	No	No	No	No		No	No	Yes	No	No	3.1	<1.20	3.98	110	3.7	114	40.66	58.3	10.1	25.4	1.74		36	4.75	No	No	No	No
No	Mal	75	164	56	90	No	No	No	Yes	Yes	No	2	0	0	T2N0M0	Ⅰ		No	Yes	No	No	No	No	Yes	No		No	No	Yes	No	No	1.5	11.85	2.65	112	4.09	122	37.96	62.1	12.7	32.4	2.39	0.5	0.77	3.94	No	No	No	No
No	Mal	58	165	59	90	No	No	No	No	Yes	No				TxN1M1	Ⅳ		No	No	Yes	No	No	No	No	No		Yes	No	Yes	No	No	789	7.94	5.36	224	4.67	138	42.66	55.8	12.8	29.6	4.67	2	0.66		No	No	No	No
No	Mal	63	160	65	80	No	Yes	No	No	No	No	4	2	0	T4N2M0	Ⅳ		No	No	No	No	No	No	No	No		No	No	Yes	No	No	1.67	14.16	5.01	212	4.81	139	47.69	68.9	11.9	26.6	1.59	0.4	0.1		No	No	No	No
No	Mal	63	176	88.5	90	No	Yes	No	No	No	No	4	0	0	T4N0M0	Ⅱ		No	No	No	No	No	No	No	No		No	No	No	No	No	>100.00	17.49	11.3	330	4.71	92	47.01	78.3	11.1	28.8	2.54		0.98		No	No	No	No
No	Fem	29	147	47	90	No	No	No	No	Yes	No	4	0	0	T4N0M0	Ⅱ		No	No	No	No	No	No	Yes	No		Yes	No	Yes	No	No	3.8	31.13	2.92	178	3.56	95	37.91	41.2	12.3	23.7	2.46		234		No	No	No	No
No	Fem	44				No	No	No	No	Yes	No	4	0	1	T4N0M1	Ⅳ		No	No	Yes	No	No	No	No	No		Yes	No	Yes	No	No			2.9	185	3.7	112	37.62	50.24							No	No	No	No
No	Mal	95			70	No	Yes	No	No	Yes	No	4	0	1	T4N0M1	Ⅳ		Yes	Yes	No	No	Yes	No	No	No		No	No	No	No	No	1.72	18.29	8.47	227	3.74	114	36.42	72.7	11.9	25.4	3.95	16.6	4.72	5.58	Yes	No	No	No
No	Fem	57	160	52	70	No	No	No	No	No	No					Ⅳ		No	No	No	No	No	No	Yes	No		No	No	No	No	No	1.8	21.09	6.26	125	3.91	108	37.29	63.1	11.3	28.5	3.7		1.28		No	No	No	No
No	Fem	69	157	68	70	No	Yes	No	Yes	No	No							No	No	No	No	No	No	No	No		No	No	Yes	No	No			3.39	121	3.98	125	43	59.5	10.4	25.1	3.09		0.62	5.07	No	No	No	No
No	Mal	55	148	46	70	No	Yes	No	No	Yes	No					Ⅲ		Yes	No	No	No	No	No	No	No		No	No	No	No	No			7.34	262	2.92	93	37.64	80.3	11.1	28.3	3.4		0.11		No	No	No	No
No	Mal	73	162	66	80	No	Yes	No	No	Yes	No				TxN1M1	Ⅳ		No	No	No	No	No	No	No	No		Yes	No	Yes	No	No	11.2	268.1	7.99	137	5.06	154	46.28	98	12.2	31.6	4.34		1.01	4.32	No	No	No	No
No	Fem	64	165	65	80	No	No	No	No	Yes	No	3	0	0	T3N0M0	Ⅲ		No	No	No	No	No	No	No	No		Yes	No	Yes	No	No	3.1		5.08	130	3.39	103	38.21	88.49	12.7	30.7	1.97		0.44		No	No	No	No
No	Mal	57	160	49	80	No	No	No	No	Yes	No	3	0	0	T3N0M0	Ⅱ		No	No	No	No	No	No	No	No		Yes	No	No	No	No	3		2.61	82	3.79	115	35.57	63.1	11.9	26.6	1.75		134		No	No	No	No
No	Mal	70	1.73	60	80	No	No	Yes	No	Yes	No				TxNxM1	Ⅳ		No	No	No	No	Yes	No	Yes	No		Yes	No	Yes	No	No	0.6		7.73	195	3.49	110	37.12	100.3	11.5	20.7	1.75		736		No	No	No	No
No	Mal	75	166	59	70	No	Yes	No	Yes	Yes	No					Ⅳ		No	No	No	No	No	No	No	No		No	No	No	No	No	1.1		3.7	134	3.49	112	30.92	60.7	12.6	29.7	3.16		133		No	No	No	No
No	Mal	58	175	64	90	No	Yes	No	No	Yes	No	4	1	1	T4N1M1	Ⅳ		No	No	No	No	No	No	No	No		No	No	Yes	No	No	1.94	9.47	5.59	177	4.55	138	46.07	68	12.1	27.8	2.49	0.6	0.22	3.68	No	No	No	No
No	Mal	59	160	72	80	No	No	Yes	No	Yes	No	4	2	0	T4N2M0	Ⅲ		No	No	No	No	Yes	No	No	No		Yes	No	Yes	No	No	29.8	24.49	6.01	149	3.59	103	30.38	54.3							No	No	No	No
No	Mal	58	172	60	90	No	No	No	No	Yes	No	4	2	0	T4N2M0	Ⅲ		No	No	No	No	No	No	No	No		Yes	No	No	No	No	6.4		6.89	125	3.87	116	38	99.7	13.5	29.1	2.33		100		No	No	No	No
No	Fem	78	155	48	60	No	No	No	No	Yes	Yes	3	2	1	T3N2M1	Ⅳ		No	No	No	No	No	No	No	No		No	No	No	No	No	>100.00		6.17	252	3.56	92	32.66	47.8	11.7	27.8	3.01		118		No	No	No	No
No	Fem	58	164	61	50	No	No	No	No	Yes	No	4	x	1	T4NxM1	Ⅳ		No	No	No	No	Yes	No	No	No		No	No	Yes	No	No	>100.00		9.2	517	4.06	85	30.48	48.8	11.6	25.7	3.52		1.95	6.34	No	No	No	No
No	Fem	82	158	30	50	No	No	No	Yes	No	Yes							No	No	No	No	Yes	No	No	No		No	No	No	No	No	<0.50		3.08	171	2.04	39	29.26	43.8	12.9	25.1	1.93		1.67		No	No	No	No
No	Mal	42	155	50	80	No	No	No	No	Yes	No	4	3	0	T4N3M0	Ⅲ		No	No	No	No	No	No	No	No		Yes	No	No	No	No	2		3.8	225	4.27	140	37.18	64.4	11.6	26.3	2.39		111		No	No	No	No
No	Mal	65	163	62	80	No	No	Yes	No	Yes	No	4	0	0	T4N0M0	Ⅱ		No	No	No	No	No	No	No	No		Yes	No	No	No	No	2.2		5.08	177	3.79	91	34.56	86.56							No	No	No	No
No	Mal	59	159	62.5	70	No	Yes	No	No	Yes	No	4	3	0	T4N3M0	Ⅲ		No	No	No	No	Yes	No	No	No		Yes	No	Yes	No	No	1.4	14.54	7.6	337	4.23	106	33.79	65.1	12.7	33.7	2.35		305	4.55	No	No	No	No
No	Mal	69	164	69	60	No	No	No	No	Yes	No	2	1	0	T2N1M0	Ⅱ		No	No	No	No	No	No	No	No		Yes	No	Yes	No	No	1.9		5.01	131	4.13	93	34.14	69.17							No	Yes	No	No
No	Mal	69	160	45	60	No	Yes	No	Yes	Yes	No	X	x	1	TxNxM1	Ⅳ		Yes	No	No	No	No	No	No	No		No	No	No	No	No	8.9		7.56	165	3.4	98	35.07	75.1	12.3	25.3	2.07		864	3.59	No	No	No	No
No	Mal	63	165	55	70	No	Yes	No	No	Yes	否（既往输过）					Ⅳ		No	No	No	No	No	No	No	No		No	No	No	No	No	1.5		10.35	356	3.56	98	34.48	77.4	12.9	32.5	2.9		388	5.34	No	No	No	No
No	Mal	74	165	60	90	No	No	No	Yes	Yes	No	2	1	0	T2N1M0	Ⅱ		No	No	No	No	No	No	No	No		Yes	No	Yes	No	No	3		4.81	123	5.5	150	41.5	71.7	12.9	35.7	1.9		130	3.54	No	No	No	No
No	Mal	63	169	52	80	No	No	Yes	No	Yes	No	3	1	x	T3N1Mx	Ⅲ		No	No	No	No	No	No	No	No		Yes	No	Yes	No	No	1.2		6.93	258	3.86	123	36.46	71.1	12.9	34.3	2.81		236		No	No	No	No
No	Mal	73	160	57	80	No	No	No	No	Yes	No	4	x	0	T4NxM0	Ⅲ		No	No	No	No	Yes	No	No	No		No	No	Yes	No	No	0.6		5.5	197	2.29	44	31.39	137.57	13.3	32.1	2.17		243	2.7	No	No	No	No
No	Mal	58	162	60	90	No	No	No	No	Yes	No				T4N1MO	Ⅲ		No	No	No	No	No	No	No	No		Yes	No	Yes	No	No	2.3		4.5	249	4.24	132	37.65	76.6	11.5	29.7	2.42		226	4.31	No	No	No	No
No	Fem	52	150	40	70	No	No	No	No	No	No				T4N1M0	Ⅲ		No	No	No	No	No	No	Yes	No		No	No	Yes	No	No	<0.50		3.38	171	4.51	126	39.08	42.3	11.6	31.3	1.4		209		Yes	No	No	No
No	Fem	73	158	64	70	No	No	No	No	No	No					Ⅳ		No	No	No	No	No	No	No	No		No	No	Yes	No	No	<0.05		7.6	547	4.37	123	37.59		11.9	39.3	3.27		1119	4.93	No	No	No	No
No	Fem	46	155	62	80	No	No	No	No	Yes	No				T2N0M0	Ⅱ		No	No	No	No	No	No	Yes	No		Yes	No	Yes	No	No	2.9	16.5	7.97	162	4.54	135	39.41	63.2	11.5	26.4	2.15		217		Yes	No	No	No
No	Mal	62	170	71	80	No	No	No	No	Yes	No				T3NxMx	Ⅱ		No	No	No	No	No	No	No	No		No	No	No	No	No	0.9		7.14	221	4.81	137	34.98	47.8	11.6	28.5	2.4		125		No	No	No	No
No	Mal	65	140	41.5	70	No	No	No	No	Yes	No					Ⅱ		No	No	No	No	No	No	No	No		Yes	No	No	No	No	2.4		3.86	229	4.23	118	34.17	75.74	12.5	30.8	2.23		116		No	No	No	No
No	Mal	66	170	68	70	No	No	No	No	No	No				T4N3M0	Ⅲ		No	No	No	No	No	No	No	No		No	No	Yes	No	No	1.1		5.3	154	5.34	158	38.49	72.8	12.4	30.1	2.09		61	4.43	Yes	No	No	No
No	Fem	39	147	50	60	No	No	No	No	Yes	Yes				T4NxM1	Ⅳ		No	No	Yes	No	No	No	No	No		Yes	No	Yes	No	No	32.4		3.88	262	3.34	74	28.58	47.4	11.2	25	2.74		285	1.46	No	No	No	No
No	Fem	60	155	60	80	No	No	No	No	No	No							No	No	No	No	No	No	No	No		No	No	Yes	No	No	1		3.68	134	4.45	132	39	51.7	11.7	33	1.6	<2.50	297	5.99	Yes	No	No	No
No	Mal	59	155	49	70	No	No	Yes	No	No	No				T2N0M0	Ⅰ		No	No	No	No	No	No	No	No		Yes	No	Yes	No	No	1.3		5.35	248	3.66	105	29.75	45.1	11.3	34.3	3.6		299		No	No	No	No
No	Mal	64	173	73	80	No	No	No	No	Yes	No							No	No	No	No	No	No	No	No		No	No	Yes	No	No	1.1	5.67	3.68	63	4.12	120	33.44	94.68	12.6	26.2	2.8	11.1	0.44	4.64	No	No	No	No
No	Mal	63	165	49	70	No	Yes	Yes	No	Yes	No				T3N2M0	Ⅲ		No	No	No	No	No	No	No	No		No	No	Yes	No	No	2.5		3.93	357	3.96	112	27.34	62.4						1.94	No	No	No	No
No	Mal	49	162	64	90	No	No	No	No	Yes	No				T4N1M0	Ⅳ		No	No	No	No	No	No	No	No		No	No	Yes	No	No			5.92	283	5.09	144	41.35	54.4							No	No	No	No
No	Fem	62	158	45	70	No	No	No	No	No	No				T2N2M0	Ⅱ		No	No	No	No	No	No	No	No		No	No	No	No	No	2.3	12.07	6.7	250	3.94	114	34.22	40.3	11.7	24.6	3.81		56	5.18	Yes	No	No	No
No	Fem	68	162	55	80	No	No	No	No	Yes	No				T2N1M1	Ⅳ		No	No	No	No	No	No	No	No		No	No	Yes	No	No	>100.00		6.25	174	4.06	129	36.81	59.5	11.7	24.3	2.86		325		No	Yes	No	No
No	Mal	60	164	50	80	No	No	No	No	Yes	No				T4N0M0	Ⅱ		No	No	No	No	No	No	No	No		No	No	Yes	No	No	2.87	11.53	3.53	111	3.75	115	42.1	62.5	10.8	28.1	2.95	1.4	0.23		Yes	No	No	No
No	Mal	63				No	No	No	No	Yes	No					Ⅳ		No	No	No	No	No	No	No	No		No	No	Yes	No	No	7.5		4.21	148	4.15	102	32.74	70.2							No	No	No	No
No	Mal	64	161	66	80	No	Yes	No	No	Yes	No				cTxNxM1	Ⅳ		No	No	No	No	No	No	No	No		Yes	No	Yes	No	No	3		4.62	206	3.7	116	40.21	63.2	12.4	32.4	3.39		1.91		No	No	No	No
Yes	Mal	70			50	No	No	No	No	Yes	No				T4NxM1	Ⅳ		Yes	Yes	No	No	No	No	No	No		No	No	No	No	No	97.3		20.5	363	2.13	51	29.2	137.7	13.8	29.8	2.9		965		No	No	No	No
No	Mal	80			60	No	Yes	No	Yes	Yes	No				TxN3M1期	Ⅳ		Yes	Yes	No	No	No	No	No	No		No	No	No	No	No			24.59	272	2.88	96	24.69	74.2	14.5	32.1	4.24		518	3.14	No	No	No	No
No	Mal	58	174	74.5	70	No	No	No	Yes	Yes	No				RT0N3M1	Ⅳ		No	No	Yes	No	No	No	No	No		Yes	No	Yes	No	No	49.6	<1.20	3.86	117	3.89	122	37.56	54.87	12.1	31	2.68		1.81	3.96	No	No	No	No
No	Fem	48	160	49	90	No	No	No	No	Yes	No				pT2N3M0	Ⅲ		No	No	Yes	No	Yes	No	Yes	No		Yes	No	No	No	No	1.8	10.52	2.69	132	4.92	99	38.34	56.42	12.1	31.8	2.17	1.4	0.22	4.61	No	No	No	No
No	Mal	68	165	63	90	No	No	No	No	Yes	No				CT3N2M1	Ⅳ		No	No	No	No	No	No	No	No		No	No	Yes	No	No			3.54	128	4.47	130	35.58	60.28	13.1	27.2	2.64		0.62	4.8	Yes	No	No	No
No	Mal	58	163	50	90	No	No	No	No	Yes	No				rT4bN3M1	Ⅲ		No	No	No	No	No	No	No	No		Yes	No	Yes	No	No	2.4		7.67	255	4.43	123	39.42	69.17							No	No	No	No
No	Mal	73	168	42	70	No	No	No	No	Yes	No					Ⅲ		No	No	No	No	No	No	No	No		No	No	Yes	No	No	3.8		11.23	231	3.98	126	33.4	81.15	13.7	32.4	2.86		0.13		No	No	No	No
No	Mal	60	168	61	70	No	No	No	No	No	No							No	No	No	No	No	No	No	No		No	No	Yes	No	No	3.73	13.91	9.34	229	5.47	170	45.72	95.5	13.1	24.8	3.27	0.5	0.26	3.76	No	No	No	No
No	Fem	40	158	43	80	No	No	No	No	No	Yes							No	No	No	Yes	Yes	No	No	No		Yes	No	Yes	Yes	No			7.8	93	3.25	106	36.21	34.8	16.4	35.1	1		33.2	4.79	Yes	No	No	No
No	Mal	68	167	65	80	No	Yes	No	No	Yes	No				pT4aN3aN0	Ⅲ		No	No	No	No	No	No	Yes	No		No	No	Yes	No	No	1.2	10.38	4.01	111	4.57	144	38.88	67.7	11.9	27.5	1.9		0.16	1.64	Yes	No	No	No
No	Fem	58	153	46	70	No	Yes	No	No	Yes	No				PT4aN3M0	Ⅲ		No	No	No	No	No	No	No	No		No	No	Yes	No	No	1.5		5.67	130	4.56	139	46.13	37.1	11.8	22.1	1.68		0.21		Yes	No	No	No
No	Mal	68	156	45	60	No	No	No	No	Yes	No				TxNxM1	Ⅳ		No	No	No	No	No	No	No	No		No	No	Yes	No	No	2.4		6.03	196	4.48	136	35.25	69.9	12.3	25.5	3.33		6.74		No	No	No	No
No	Mal	74	166	56	80	No	No	No	No	Yes	Yes				T4aN1M0	Ⅲ		No	No	No	No	No	No	No	No		No	No	Yes	No	No	0.7		4.23	256	2.2	60	30.01	60.6	11.9	26.4	1.88		2.55		Yes	No	No	No
No	Fem	57	151	55	80	No	No	No	No	Yes	No				PT0N1M0	Ⅰ		No	No	No	No	Yes	No	No	No		No	No	Yes	No	No	2.3	1.67	5.04	268	3.94	80	38.41	67.63	12.1	31	3.16		2.11	6.45	No	No	No	No
No	Mal	51	170	62	90	No	Yes	No	No	No	No					Ⅰ		No	Yes	No	No	No	No	No	No		No	No	Yes	No	No	2.87	6.57	5.34	161	4.5	148	49.49	80.6	12.1	26.1	1.99	0.8	0.19	5.06	No	No	No	No
No	Mal	53	158	62	90	No	No	No	No	Yes	No				cT4bN2M0	Ⅲ		No	No	No	No	No	No	No	No		No	No	Yes	No	No	2.1		6.85	200	3.76	116	38.38	56.3	13.2	31.9	3.46		0.36		No	No	No	No
No	Mal	65	165	71	80	No	Yes	No	No	Yes	No				pT4aN1M0	Ⅲ		No	No	No	No	No	No	No	No		No	No	Yes	No	No	<0.50	11.98	6.65	132	4.82	156	37.43	84.8	12.4	30.6	2.04		0.35	4.61	Yes	No	No	No
No	Mal	49	168	55	90	No	No	No	No	Yes	No				pT4bN3aM0	Ⅲ		No	No	No	No	Yes	No	Yes	No		Yes	No	Yes	No	No	1.3	8.78	3.28	265	4.9	151	44.22	72.3	11.7	28	2.9		0.18		Yes	No	No	No
No	Mal	58	165	45	40	No	No	No	No	Yes	Yes				TxNxM1	Ⅳ		No	No	No	No	No	No	No	No		No	No	No	No	No	5.8		10.9	287	3.56	118	27.67	127.13	12.9	30.6	3.66		2.99	1.91	No	No	No	No
No	Mal	65	156	49	80	No	Yes	No	No	Yes	No				pT4N3M0	Ⅲ		No	No	Yes	No	No	No	No	No		Yes	No	Yes	No	No	2.6	<1.20	4.59	228	3.72	119	31.63	102.27	12.2	26.4	4.41		2.54	2.61	No	No	No	No
No	Mal	76	153	48	70	No	No	No	Yes	Yes	No				cT4N1M0	Ⅲ		No	No	No	No	No	No	No	No		Yes	No	Yes	No	No	3.9		5.27	90	4.01	131	37.3	62.1	10.8	22.8	2.56		0.8		No	No	No	No
No	Fem	51	162	48	80	No	No	No	No	Yes	No				pT1N0M0	Ⅰ		No	No	No	No	No	No	No	No		Yes	No	Yes	No	No	2.9	22.67	3.21	131	3.17	116	39.16	38.9	9	23.1	2.59		0.61		No	No	No	No
No	Mal	63	161	63	80	No	No	No	No	Yes	No				TxNxM1	Ⅳ		No	No	No	No	No	No	Yes	No		Yes	No	Yes	No	No	17.1	7.59	6.39	166	3.53	106	38.57	163.6	15	23.4	2.77		6.01	3.78	No	No	No	No
No	Mal	68	160	60	70	No	Yes	No	No	Yes	Yes				T4NxM1	Ⅳ		No	No	No	No	No	No	Yes	No		Yes	No	Yes	No	No	>100.00		6.3	207	4.68	122	40.64	79.5	10.5	24.4	4.3		6.97		No	No	No	No
No	Mal	67	169	66	90	No	No	No	No	Yes	No				cT4N0M0	Ⅱ		No	No	No	No	No	No	No	No		No	No	Yes	No	No	1		3.96	211	4.3	120	36.57	73.2	11.5	30.1	2.53		0.24	4.19	No	No	No	No
No	Fem	80	155	55	80	No	No	No	No	No	No					Ⅳ		No	No	No	No	No	No	No	No		No	No	No	No	No			6.7	181	4.36	131	42.09	55.1							No	No	No	No
No	Fem	52	151	50	90	No	No	No	No	Yes	No					Ⅳ		No	No	No	No	No	No	No	No		No	No	No	No	No			3.83	182	3.6	105	33.29	51.5	12.7	25.6	2.54		1.64		No	No	No	No
No	Fem	44	155	60	90	No	No	No	No	Yes	No				PT4N3M0	Ⅲ		No	No	No	No	Yes	No	No	No		No	No	Yes	No	No	0.8	5.09	3.62	199	4.33	74	45.61	55.8	11.7	26.9	3	0.8	0.22	6.19	No	No	No	No
No	Mal	60	174	61	90	No	No	No	No	Yes	No				PT4N3M1G1	Ⅳ		No	No	No	No	No	No	No	No		No	No	Yes	No	Yes	0.96		2.01	142	3.09	100	35.2	51.7	13.1	34.6	2.04		0.31		Yes	No	No	No
No	Mal	60	1.54	55	80	No	No	No	No	Yes	No				PT3N2M0	Ⅲ		No	No	No	No	No	No	Yes	No		No	No	Yes	No	Yes	1.56	549.19	4.87	99	4.41	145	39.49	100.3	13	34.5	1.64		0.04	4.36	Yes	No	No	No
No	Mal	73	164	63	80	No	No	No	No	Yes	No				T4N0M0	Ⅱ		No	No	No	No	No	No	No	No		No	No	Yes	No	Yes	1.4		6.65	270	4.25	126	38.64	82.4	11.4	29.8	2.23		0.19		Yes	No	No	No
No	Fem	60	158	50	70	No	No	No	No	Yes	No				CT4N1M1	Ⅳ		No	No	No	No	No	No	No	No		No	No	Yes	No	No	1		6.57	179	3.6	104	42.48	52.1	12	35.7	3.59		3.89		Yes	No	No	No
No	Mal	65	169	50	80	No	No	No	No	Yes	No				RT2NIMI	Ⅱ		No	No	No	No	No	No	No	No		No	No	No	No	No	1.7		3.29	174	3.81	118	37.36	77.4						1.95	No	No	No	No
No	Mal	67	168	65	80	No	No	No	No	Yes	No				CT4N1M1	Ⅳ		No	No	No	No	No	No	No	No		Yes	No	No	No	No	11.3		6.16	147	5.87	124	44.85	65	11.3	29.5	2.54		0.19		No	No	No	No
No	Mal	47	174	65	70	No	No	No	No	Yes	No					Ⅳ		No	No	No	No	No	No	No	No		No	No	Yes	No	No	4.6		9	277	4.16	128	40.88	60.9	12.8	31.7	4.46		0.23		Yes	No	No	No
No	Fem	86	150	38	50	No	No	No	No	Yes	No				PT4N0M0	Ⅲ		No	No	No	No	Yes	No	No	No		No	No	Yes	No	No	1	8.29	5.53	212	2.22	43	27.94	47.1	14	26.2	3.05		1.88		No	No	No	No
No	Mal	56	174	60	70	No	No	No	No	Yes	Yes				PT1N0M0	Ⅰ		No	No	No	No	Yes	No	No	No		No	No	Yes	No	No	3.3	17.77	3.8	255	2.45	44	42.47	71.3	13.1	26.5	2.26	17.5	0.54	1.97	No	No	No	No
No	Mal	53	178	75	80	No	No	No	No	No	No					Ⅰ		No	No	No	No	No	No	No	No		No	No	No	No	No	3.25	6.35	4.8	198	5.07	158	46.47	81.8	12.1	25.6	1.95		0.08		Yes	No	No	No
No	Mal	81	176	70	80	No	Yes	No	No	Yes	No							No	No	No	No	No	No	No	No		No	No	No	No	No	1	46.46	4.38	100	4.77	141	38.36	69.8	12.6	31.6	2.64		0.27	3.32	No	No	No	No
No	Mal	61	155	66	90	No	No	No	No	Yes	No				CT4N2M0	Ⅲ		No	No	No	No	No	No	No	No		No	No	No	No	No	1.8		5.9	208	4.35	117	37.68	101.33	11.6	24.4	3.59		0.29		No	No	No	No
No	Mal	56	157	64	70	No	No	No	No	Yes	Yes				PT3N2M0	Ⅲ		No	No	Yes	No	No	No	No	No		Yes	No	Yes	No	No	1.26		3.97	203	3.86	115	38.21	62.7	11.8	35.8	2.95		1.11		No	No	No	No
No	Mal	58	159	64	80	No	No	No	No	Yes	No				RT3N2MX	Ⅲ		No	No	No	No	No	No	No	No		Yes	No	Yes	No	No	57.5	<2.50	4.79	260	4.35	95	39.77	102.18							No	Yes	No	No
No	Fem	49	150	51	80	No	No	No	No	Yes	No				TISN0M0			No	No	No	No	No	No	No	No		No	No	Yes	No	No	1.25		4.85	167	4.62	134	42.03	57.7	11.7	26	2.4		0.26	5.04	Yes	No	No	No
No	Mal	65	155	60	90	No	Yes	No	No	Yes	No				PT3N0M0	Ⅲ		No	No	No	No	Yes	No	Yes	No		Yes	No	No	No	No	3.19	8.95	4.41	216	5.1	144	42.16	58	12.9	24.7	3.11	2.1	0.41	4.03	No	No	No	No
No	Fem	49	153	43	90	No	No	No	No	Yes	No				PT4N1M0	Ⅲ		No	No	No	No	Yes	No	No	No		Yes	No	No	No	No	1.6	13.25	4.16	219	5.41	116	41.84	47.7	13.1	28.7	2.42	0.9	0.31		No	No	No	No
No	Mal	56	159	46.5	70	No	No	No	No	Yes	Yes				T4BNXM1	Ⅳ		No	No	No	No	No	No	No	No		No	No	Yes	No	No	0.5		4.91	368	3.62	90	33.31	49	13.9	31.7	3.86		0.96		Yes	No	No	No
No	Mal	59	175	65	70	No	Yes	No	No	Yes	No				PT4N3M0	Ⅲ		No	No	No	No	No	Yes	No	No		No	No	No	No	No	7.47	31.58	11.79	266	4.21	110	37.39	321.4	14.3	25.6	3.33		30.1		No	No	No	No
No	Mal	47	165	64	90	No	No	No	No	Yes	No				T4N1M0	Ⅲ		No	No	No	No	No	No	Yes	No		No	No	Yes	No	No	9.44	21.58	3.97	186	4.94	158	45.94	65.4	11.4	27.2	2.39	1.2	0.17	5.68	Yes	No	No	No
No	Fem	70	153	60	80	No	Yes	No	No	Yes	Yes				T4N1M0	Ⅳ		No	Yes	No	No	Yes	No	No	No		No	No	Yes	No	No	0.8		4.93	124	2.22	65	32.7	81	13.9	25	3.1		0.45	3.4	No	No	No	No
No	Mal	60	164	52	80	No	No	No	No	Yes	No				PT2N0M0	Ⅰ		No	No	No	No	No	No	No	No		No	No	Yes	No	Yes	3.71	1.33	4.39	255	4.74	139	43.91	70.6	13	27.8	3.59		0.38		Yes	No	No	No
No	Fem	42	157	41	60	No	No	No	No	Yes	No				PT3N2MX	Ⅲ		No	No	No	No	No	No	Yes	No		No	No	Yes	No	No	1.34		5.1	201	4.19	117	39.72	54.1	12.3	30	3.46		1.53		No	No	No	No
No	Mal	62	158	61	90	No	Yes	No	No	No	No					Ⅱ		No	No	No	No	No	No	No	No		No	No	No	No	No			6.92	131	5.19	157	42.47	69.8	11.6	26.9	2.64		0.14		No	No	No	No
No	Mal	78	162	60	90	No	No	No	No	Yes	No				PT3N0M0	Ⅱ		No	No	No	No	No	No	No	No		No	No	Yes	No	Yes	1.5		4.62	182	3.88	126	37.42	127.3	11.7	27.2	2.29		0.38		Yes	No	No	No
No	Fem	66			40	No	No	Yes	No	Yes	Yes					Ⅳ		No	Yes	No	No	No	No	Yes	No		No	No	No	No	No	7.93		9.61	342	3.67	77	24.17	47.7	11.5	26.8	2.4		0.72		No	No	No	No
No	Fem	55	156	40	70	No	No	No	No	Yes	Yes				T2N1M1	Ⅳ		No	No	No	No	No	No	No	No		No	No	Yes	No	No			3.7	126	3.85	108									No	No	No	No
No	Mal	66	155	57.5	90	No	No	No	No	Yes	No				PT3N3M0	Ⅲ		No	No	No	No	No	No	No	No		No	No	Yes	No	Yes	<0.50		6.12	250	5.82	122	46	101.2	13.6	22	3.25		0.38		Yes	No	No	No
No	Mal	71			40	No	No	No	No	Yes	No							Yes	No	No	No	Yes	No	No	No		No	No	No	No	No	1.89		9	451	3.93	71	33.87	71	13.2	29.3	3.89		0.58		No	No	No	No
No	Fem	76	145	42	90	No	No	No	No	No	No							No	No	No	No	No	No	No	No		No	No	Yes	No	No	<0.50	6.45	6.14	290	5.05	137	39.19	52.9	11.8	22.8	3.81		1		No	No	No	No
No	Mal	49	170	50	60	No	No	No	No	Yes	No					Ⅲ		No	No	No	No	No	No	No	No		No	No	No	No	No	2.37	75.61	6.51	128	4.07	125	36.26	63.8	13.8	28	2.23		1.59		No	No	No	No
No	Mal	66	155	61	90	No	No	No	No	Yes	No				PT3N1M0	Ⅲ		No	No	No	No	No	No	No	No		No	No	Yes	No	Yes	4.3		6.59	252	5.14	166	42.91	78.1	10.4	25.5	3.04		0.46		Yes	No	No	No
No	Fem	48	155	48.5	80	No	No	No	No	Yes	Yes							No	No	No	No	No	No	No	No		No	No	No	No	No	<0.50		4.4	216	5.59	118	48.41	49.9	10.4	26.7	2.22		0.77		No	No	No	No
No	Mal	69	170	57.5	80	No	No	No	No	Yes	No				CT4N2M0	Ⅲ		No	No	No	No	No	No	No	No		No	No	No	No	No	10	11.84	8.54	245	4.07	113	37.09	64.5	12.1	24.4	3.4		1.85		No	No	No	No
No	Mal	60	171	63.5	90	No	No	No	No	No	Yes					Ⅲ		No	No	No	No	No	No	No	No		No	No	Yes	No	No	1.55		15.57	283	4.36	114	30.46	102.7	11.9	27.4	5.02		0.46		No	No	No	No
No	Mal	57	169	60	80	No	No	No	No	Yes	No				PT4N0M0	Ⅱ		No	No	No	No	No	No	No	No		No	No	Yes	No	Yes	1.59	2.26	3.81	141	4	118	36.76	92.9	12.6	22.2	2.29		5.1	4.17	Yes	No	No	No
No	Mal	67	155	60	100	No	Yes	No	No	Yes	No					Ⅳ		No	No	No	No	No	No	No	No		No	No	Yes	No	No	2.59	24.47	4.29	113	3.77	122	37.95	87.9	12.4	26.8	3.1		0.61		No	No	No	No
No	Mal	58	165	45	70	No	No	No	No	Yes	Yes				T4N1M1	Ⅳ		No	No	Yes	No	Yes	No	No	No		No	No	Yes	No	No	>100.00	>700.00	13.47	544	3.1	51	31	66.4	12.7	30.3	2.54		1.52	2.74	No	No	No	No
No	Mal	68	175	66.5	50	No	No	No	Yes	Yes	Yes				T2N2M1	Ⅳ		No	No	No	No	No	No	No	No		No	No	No	No	No	>1500.00	11.02	7.21	91	3.64	114	29.91	94.3	15.6	36.5	1.28		7.7	7.8	No	No	No	No
No	Mal	71	171	61	80	No	No	No	No	Yes	No				CT4NXMX	Ⅲ		No	No	No	No	No	No	No	No		No	No	No	No	No	4.65	18.83	6.94	141	5.11	151	40.59	83.4	13.2	27.1	2.95		1.39		No	No	No	No
No	Mal	73	161	61	80	No	Yes	No	No	Yes	No					Ⅳ		No	No	No	No	No	No	No	No		No	No	Yes	No	No	5.04		8.1	237	4.63	142	35.38	67.6	13.9	25.7	4.15		1.11	3.73	No	No	No	No
No	Fem	45	155	51	80	No	No	No	No	Yes	No					Ⅳ		No	No	No	No	No	No	No	No		No	No	Yes	No	No	<0.50		4.67	156	4.18	129	39.75	53.56	11.8	32.3	2.15	0.2	0.06	4.48	No	No	No	No
No	Mal	74			50	No	No	No	No	Yes	No				TXNXM1	Ⅳ		No	Yes	No	No	No	No	No	No		No	No	Yes	No	No	8.82	7.01	5.62	185	4.16	130	41.7	86.9	12.1	26.2	3.59		1.08		No	Yes	No	No
No	Mal	57	165	40	70	No	No	No	No	Yes	Yes				RT3N2M1	Ⅳ		No	Yes	No	No	No	No	Yes	No		No	No	No	No	No	1.49		7.4	179	4.15	123	39.72	54.3	18.7	26.1	3.59		2.31		No	No	No	No
No	Mal	54	168	63	80	No	No	No	No	Yes	No				PT1N0M0	Ⅰ		No	No	No	No	No	No	No	No		No	No	Yes	No	No	1.28	17.41	3.7	144	4.42	143	46.79	84.5							No	No	No	No
No	Mal	58	162	55	70	No	No	No	Yes	No	No							No	No	No	No	Yes	No	Yes	No		No	No	No	No	No	5.07	>700.00	16.11	253	5.75	102	44.82	103.9	10.8	20.9	2.8		0.19	3.1	No	No	No	No
No	Mal	70	157	58.5	70	No	Yes	No	No	Yes	No					Ⅳ		Yes	No	No	No	No	No	No	No		No	No	No	No	No	7.5	>700.00	10.17	158	3.98	119	33.62	75.9	13.3	26.9	4		0.95	5.16	No	No	No	No
No	Mal	55	157	53	80	No	No	No	No	Yes	No				cT3N1M0	Ⅲ		No	No	No	No	No	No	No	No		Yes	No	Yes	No	No	2.4	7.39	7.77	368	3.56	93	33.04	96.5	11.6	23.5	2.98		0.15		No	Yes	No	No
No	Fem	70	147	41	80	No	No	No	No	Yes	No					Ⅲ		No	No	No	No	No	No	No	No		No	No	No	No	No	17.3		4.07	220	5.43	115	40.47	56.7	12.1	31.9	2.68		0.66		No	No	No	No
No	Mal	61	165	46	80	No	No	No	No	Yes	No					Ⅳ		No	No	No	No	No	No	No	No		No	No	Yes	No	No	1		5.58	204	4.1	92	36.92	84.3							No	No	No	No
No	Mal	47	161	44	70	No	No	No	No	Yes	No					Ⅲ		No	No	No	No	No	No	No	No		No	No	Yes	No	No	1.1	3.64	6.38	202	4.82	150	46.44	78.8	13.3	31.9	2.68		0.15		No	No	No	No
No	Fem	77	145	43	70	No	Yes	No	Yes	Yes	No				cT4N2Mx	Ⅲ		No	No	No	No	No	No	No	No		No	No	Yes	No	No	1.2		4.7	207	5.8	117	39.73	49.5	12.4	26.2	2.28		0.51		No	No	No	No
No	Mal	76	161	61	70	No	No	No	No	Yes	Yes					Ⅲ		Yes	No	No	No	No	No	No	No		No	No	Yes	No	No															No	No	No	No
No	Fem	58	150	43		No	No	No	No	Yes	No					Ⅱ		No	No	No	No	No	No	No	No		Yes	No	Yes	No	No	<0.50	5.07	7.23	241	3.69	114	37.36	56	13.1	31.4	3.66		0.33	4.81	No	No	No	No
No	Mal	67	158	60	80	No	Yes	No	No	Yes	No				cT2N1M0	Ⅱ		No	No	No	No	No	No	No	No		No	No	Yes	No	No	<0.50	6.64	8.5	217	3.94	105	40.51	92.3	10.8	30.8	4.46		0.33	6.96	No	No	No	No
No	Mal	53			70	No	No	No	No	No	No				pT4N1M0	Ⅱ		No	No	No	No	No	No	No	No		No	No	No	No	No			16.3	124	3.58	108	33	72.7							No	No	No	No
No	Mal	63	165	47	90	No	No	No	No	Yes	No				pT4N0M0	Ⅲ		No	No	No	No	No	No	No	No		No	No	Yes	No	Yes			5.59	165	4.08	128	39.85	61.8	10.2	24.4	2.59		0.28		Yes	No	No	No
No	Mal	63	161	60	80	No	Yes	No	Yes	Yes	No					Ⅲ		No	No	Yes	No	No	No	No	No		Yes	No	Yes	No	No	1.36	1.29	4.63	137	4.64	138	46.07	64.4	11.8	27	3.11		0.26	4.91	No	Yes	No	No
No	Fem	82			60	No	No	No	No	No	Yes							Yes	No	No	No	Yes	No	No	No		No	No	Yes	No	No	45.3		8.65	172	1.33	32	26.72	69.6	12.4	18.6	3.11		4.1	2.08	No	No	No	No
No	Mal	48	166	69	70	No	No	No	No	Yes	No					Ⅳ		No	No	No	No	No	No	No	No		No	No	No	No	No	3.9	6.03	8.12	171	4.97	150	40.43	84.9	12.6	23.6	3.81		5.11		No	No	No	No
No	Fem	54	160	48	90	No	No	No	No	Yes	No				cT4N3M1	Ⅳ		No	No	No	No	No	No	No	No		Yes	No	Yes	No	Yes			9.77	536	3.24	82	24.52	42							No	No	No	No
No	Mal	61	160	56	70	No	No	No	No	Yes	No				pT3N0M0	Ⅱ		No	No	Yes	No	Yes	No	No	No		No	No	Yes	No	Yes	2.4	2.52	7.71	218	4.8	137	37.51	64.6	11	23.4	2.74		0.2	5.95	Yes	No	No	No
No	Mal	65	152	49	90	No	No	No	No	Yes	No				pT3N2M0	Ⅲ		No	No	No	No	No	No	No	No		No	No	Yes	No	Yes	2.6		8.06	245	5.01	155	45.02	56.7	10.8	25.3	2.53		0.13		Yes	No	No	No
No	Mal	63	164	53	90	No	No	No	Yes	Yes	No				T4N1M0	Ⅰ		No	Yes	No	No	No	No	No	No		No	No	Yes	No	No	1.7	13.44	4.22	174	4.45	122	37.15	59.6	12.4	29.8	3.81		0.14	3.84	Yes	Yes	No	No
No	Fem	31			90	No	No	No	No	Yes	No				T4NxM1	Ⅰ		No	No	No	No	No	No	No	No		No	No	Yes	No	No	<0.50	18.44	8.26	152	5.01	139	48.78	49.4	11.2	24.4	2.09	0.9	0.18		Yes	No	No	No
No	Mal	82	165	50	70	No	No	No	No	Yes	No							No	No	No	No	No	No	Yes	No		No	No	No	No	No	1.5	9.62	5.74	194	5.86	116	39.21	78.6	13.1	28	3.1		0.28		No	No	No	No
No	Mal	53	173	71	70	No	No	No	No	Yes	No				T4NxM1	Ⅳ		No	No	No	No	No	No	No	No		Yes	No	Yes	No	No	16.8	85.16	4.71	252	4.16	129	43.99	87.2	11.3	30.3	2.6		0.36		No	No	No	No
No	Mal	60	160	60	90	No	Yes	No	Yes	Yes	No				TisN0M0	Ⅰ		No	No	No	No	No	No	No	No		No	No	Yes	No	No	0.8	5.02	3.78	130	4.56	147	44.58	81	11.9	24.2	3.52		0.33	5.01	Yes	No	No	No
No	Fem	63				No	No	No	No	Yes	Yes				pT1N0M0	Ⅰ		No	No	No	No	No	No	No	No		Yes	No	Yes	No	Yes	<0.50		3.72	120	4.46	140	46.83	61.4	11.6	23.1	2.39		0.27		Yes	No	No	No
No	Mal	62	165	42	80	No	No	No	No	Yes	No					Ⅳ		No	No	No	No	No	No	No	No		No	No	Yes	No	No	1.2	18.52	2.77	137	3.51	92	31.09	58.6	11.5	23.6	2.98		0.69		No	No	No	No
No	Mal	26	160	50	80	No	No	No	No	No	No				pT4N2M0	Ⅳ		No	No	No	No	No	No	No	No		No	No	Yes	No	No	4.3	3.72	4.64	226	4.26	129	42.53	59.2	12.6	27.3	2.12		0.45		No	No	No	No
No	Mal	73	165	64	80	No	No	No	No	Yes	Yes							No	No	No	No	No	No	No	No		No	No	No	No	No															No	No	No	No
No	Mal	76	165	45	80	No	No	No	No	Yes	No				T4NxM0	Ⅳ		No	No	No	No	Yes	No	No	No		Yes	No	Yes	No	No	2	83.12	3	189	3.31	84	34.78	54.7	12.3	26.1	3.33		0.66		No	No	No	No
No	Mal	54	160	44	80	No	No	No	No	Yes	No				T4N3M0	Ⅲ		No	No	No	No	No	No	No	No		No	No	No	No	No	2.4		4.14	135	3.04	67	34.2	50.5	12.8	29.7	2.9		0.97		No	No	No	No
No	Mal	75	158	55.5	90	No	No	No	No	Yes	No				cT3N0M0	Ⅱ		No	No	No	No	Yes	No	No	No		No	No	Yes	No	No	6.5		4.34	223	3.92	94	43.61	78.5	12.7	25.3	2.22		0.3		No	No	No	No
No	Mal	55	175	75	70	No	Yes	No	Yes	Yes	No				pTxNxM1	Ⅳ		No	No	No	No	No	No	No	No		No	No	No	No	No	3.6	>700.00	8.2	246	3.63	98	28.59	118.4	13.8	35.2	4.15		5.1		No	No	No	No
No	Mal	60	168	62.5	90	No	No	No	No	Yes	Yes				pT3N0M0	Ⅱ		No	No	No	No	No	No	No	No		No	No	Yes	No	Yes	3		5.35	112	4.98	151	39.26	85.8	11.1	25.2	1.45		0.05		Yes	No	No	No
No	Mal	63	162	52	60	No	No	No	No	Yes	No					Ⅳ		No	No	No	No	No	No	No	No		No	No	Yes	No	No	14.62	12.42	8.43	164	4.39	126	33.11	78.4	12.3	26.3	3.05		0.39		No	No	No	No
No	Mal	62	175	70	80	No	No	No	No	No	No				pT4NxM1	Ⅳ		No	No	No	No	No	No	Yes	No		Yes	No	Yes	No	No	0.9	5.49	4.24	169	4.48	139	41.6	58	11.6	26.3	2.32		0.32		Yes	No	No	No
No	Mal	79	164	68	90	No	No	No	No	Yes	No				T2N0M0	Ⅱ		No	Yes	No	No	Yes	No	Yes	No		No	No	Yes	No	Yes	2.7	<1.20	7.3	143	5.23	152	45.85	67.4	12.5	24.6	2.9	6.9	0.51	4.39	Yes	No	No	No
No	Mal	73			50	No	Yes	No	No	No	No					Ⅳ		No	No	No	No	No	No	No	No		No	No	No	No	Yes			10.32	151	2.69	76	22.22	43.5	14.4	30.6	2.64		3.88		No	No	No	No
No	Mal	63	174	51	70	No	No	Yes	No	Yes	No					Ⅰ		No	No	No	No	No	No	No	No		No	No	Yes	No	No	7	28.68	5.4	159	4.35	136	39.53	80.8	12.2	31	2.32		0.85	3.8	No	No	No	No
No	Fem	62	167	42	60	No	No	No	No	Yes	No				pT2N3M0	Ⅳ		No	Yes	No	No	Yes	No	No	No		No	No	Yes	No	No		24.58	4.01	96	4.26	86	38.23	39.9	12.7	26.9	2.36		0.33		No	No	No	No
No	Fem	57	160	61	80	Yes	No	No	No	No	Yes				pT4N0M0	Ⅱ		No	No	Yes	No	No	No	No	No		No	No	Yes	No	Yes	32.8	17.23	3.65	248	4.15	104	44.58	46.1	11.8	26.2	2.49	2.1	0.13		Yes	No	No	No
No	Fem	61	152	54	80	No	No	No	No	Yes	No				T4NxM0	Ⅲ		No	No	No	No	No	No	No	No		Yes	No	Yes	No	No	1.2	16.09	6.75	231	3.86	118	37.58	68.2	13.1	23.8	3.98		2.09		Yes	No	No	No
No	Mal	48	164	57	70	No	No	No	No	Yes	Yes				cT4N2Mx	Ⅳ		Yes	No	No	No	No	No	No	No		No	No	No	No	No	1.19	<1.20	17.6	365	1.56	45	27.39	65.9	12.1	25	3.74		1.66		No	No	No	No
No	Fem	50	142	52	90	No	No	No	No	No	Yes				cT2N0M0	Ⅰ		No	No	No	No	No	No	No	No		Yes	No	No	No	No	2.34	38.53	5.37	206	4.82	135	46.7	68.4	12.4	30.5	2.77		0.24		No	No	No	No
No	Mal	88	152	52	80	No	Yes	No	No	No	No							No	No	No	No	No	No	No	No		No	No	No	No	No			5.6	138	3.33	103	30.6	65.8							No	No	No	No
No	Mal	61			70	No	No	No	No	Yes	No							No	Yes	Yes	No	No	No	No	No		No	No	Yes	No	No			0.6	20	2.71	79	28.71	105.6	14.3	24.4	3.46		2.77		No	No	No	No
No	Fem	78	158	50	70	No	Yes	No	Yes	Yes	Yes				T4N1M0	Ⅲ		Yes	No	No	No	Yes	No	No	No		No	No	Yes	No	No	2.04		12.86	581	2.49	58	33.17	49	12.9	26.2	5.02		0.89	4	No	No	No	No
No	Mal	49				No	Yes	No	No	Yes	No					Ⅰ		No	No	No	No	Yes	No	No	No		No	No	Yes	No	No	2.82	4.92	6.38	238	4.44	139	39.41	67.3	12.4	26.3	3.04	0.8	0.24	4.91	Yes	No	No	No
No	Mal	69	160	60	90	No	No	No	No	Yes	Yes				cT3N2M1	Ⅳ		No	No	No	No	No	No	No	No		Yes	No	Yes	No	No			7.69	201	3.64	80	40.86	64.2	13.2	29.7	4.55		0.72		No	No	No	No
No	Mal	78	159	63	70	No	Yes	No	No	Yes	Yes							No	No	No	No	Yes	No	No	No		No	No	No	No	No			5.07	190	3.52	75	34.93	57.5	13.8	26	2.69		3.19		No	No	No	No
No	Mal	57	160	55	70	No	No	No	No	Yes	No				cT4NxM0	Ⅲ		No	No	No	No	No	No	No	No		No	No	Yes	No	No	1.1	3.26	3.49	324	3.58	61	34.73	69	12.7	24.5	3.6		0.55		No	No	No	No
No	Fem	40				No	No	No	No	Yes	No				T4N3M0	Ⅲ		No	No	No	No	Yes	No	No	No		Yes	No	Yes	No	No	2.35	67.06	3.57	119	3.45	95	39.94	54.5	12.5	32.6	2.49		0.56		No	No	No	No
No	Mal	75				No	No	Yes	No	Yes	No				T2NxM1	Ⅳ		No	No	No	No	No	No	No	No		Yes	No	Yes	No	No	4.39	411.76	6.52	130	3.22	102	31.95	81	15.2	39	2.69		0.92	3.61	No	No	No	No
No	Mal	69			60	No	No	No	No	No	No							Yes	No	No	No	Yes	No	No	No		No	No	No	No	No	1		5.9	105	2.52	75	28.39	73.4	13	28.2	2.17		0.18		No	No	No	No
No	Mal	72	160	51	80	No	No	No	No	Yes	No				T4NxM1	Ⅳ		No	No	No	No	No	No	No	No		Yes	No	Yes	No	No	2.1	31.16	6.44	351	4.15	124	37.35	72.1	11.8	24.5	4.83		0.61		No	No	No	No
No	Mal	62	163	53	70	No	No	No	No	Yes	No				T3N0M0	Ⅱ		No	No	No	No	No	No	No	No		No	No	Yes	No	No	5.11	13.18	6.43	222	4.75	146	45.98	76.6	12.3	31.8	3.21		0.19		Yes	No	No	No
No	Fem	38	154	43.5	80	No	No	No	No	Yes	No				T4N3M0	Ⅲ		No	No	No	No	No	No	No	No		Yes	No	Yes	No	No	0.85	33.71	6.36	259	3.79	104	34.05	43.58							No	No	No	No
No	Mal	63				No	No	No	No	Yes	No				cT3N1M0	Ⅲ		No	No	No	No	No	No	No	No		No	No	Yes	No	No	6.69		7.71	404	4.25	81	39.6	59.6	11.9	25.1	3.48		0.33		No	No	No	No
No	Fem	78				No	No	No	No	Yes	No							No	No	No	No	No	No	No	No		No	No	No	No	No	8.7		2.45	130	3.95	115	47.11	47.7	12.9	32.7	2.72		0.68	5.19	No	No	No	No
No	Fem	59				No	No	No	No	Yes	No				T3N0M0	Ⅰ		No	No	No	No	No	No	No	No		No	No	Yes	No	No	1.6		3.9	150	4.1	130	48.39	56.6	11.6	24.5	3.16		0.13		Yes	No	No	No
No	Fem	35				No	No	Yes	No	Yes	No				T4N1Mx	Ⅳ		No	No	No	Yes	No	No	No	No		No	No	Yes	No	No	1.6	39.25	4.61	125	3.73	105	44.69	47.9	12	21	2.07	0.2	0.16	4.18	No	No	No	No
No	Mal	71				No	No	No	No	Yes	No					Ⅱ		No	No	No	No	No	No	No	No		No	No	Yes	No	No	2.8	33.32	3.52	247	3.33	100	30.39	72.4	12.3	26.5	2.49		0.29		No	No	No	No
No	Mal	76				No	Yes	No	No	Yes	No							No	No	No	No	No	No	No	No		No	No	Yes	No	No	3.25		4.7	86	3.71	111	38.12	85.7	12.9	39.8	3.39		0.89	4.41	No	No	No	No
No	Mal	52				No	No	No	No	Yes	Yes				T4NxM1	Ⅳ		Yes	No	No	No	No	No	Yes	No		No	No	No	No	No			8.35	138	4.27	125	34.87	59.2	14	22	4.06		1.96		No	No	No	No
No	Fem	19				No	No	No	No	Yes	No				T2N0M0	Ⅰ		No	No	No	No	Yes	No	No	No		No	No	Yes	No	No	1.4	41.17	5.29	252	5.08	131	52.56	59.1	13.4	35.5	2.32	2.7	0.52		Yes	No	No	No
No	Mal	69	158	60	80	No	No	No	No	Yes	No				cT4N2M0	Ⅲ		No	No	No	No	No	No	No	No		No	No	Yes	No	No	30.4	10.01	6.58	202	5.03	154	43.12	81.1	12	24.1	2.29		0.12	4.18	No	No	No	No
No	Mal	63	172	74	80	No	Yes	No	No	Yes	Yes				TxNxM1	Ⅳ		Yes	No	No	No	Yes	No	No	No		No	No	No	No	No			11.41	243	3.96	126	36.17	77.9	13.3	23.8	4.06		2.77		No	No	No	No
No	Mal	87			50	No	Yes	No	Yes	No	Yes							Yes	Yes	No	No	Yes	No	No	No		No	No	Yes	No	Yes	2	<1.20	10.8	281	3.55	103	29.65	53.4	12.7	23.4	3.59		0.78	2.56	No	No	No	No
No	Fem	70				No	No	No	No	Yes	No					Ⅳ		No	No	No	No	Yes	No	No	No		No	No	Yes	No	No	<0.50	5.89	5.08	515	3.23	72	30.1	40.9	13.4	24.5	4.06		0.97		No	No	No	No
No	Mal	77	170	64	90	No	Yes	No	No	Yes	No				T2N0M0	Ⅰ		No	No	No	No	Yes	No	No	No		No	No	Yes	No	Yes	1.2	7.84	5.3	198	4.35	136	49.1	82.7	11.9	27.7	3		0.2		Yes	No	No	No
No	Mal	70	166	60	80	No	No	No	No	Yes	No					Ⅳ		No	No	No	No	No	No	No	No		No	No	Yes	No	No	3.4	38.27	3.28	75	3.3	120	32.68	69.1	14.6	32.6	2.29		1.49		No	No	No	No
No	Fem	60	154	46	80	No	No	No	No	Yes	Yes				cT3NxM0	Ⅰ		No	No	No	No	No	No	No	No		No	No	Yes	No	No	0.9		4.18	242	4.1	124	44.44	57.1	11.8	25.9	2.74		0.25		No	No	No	No
No	Fem	58	155	54	90	No	No	No	No	Yes	Yes	1	0	0	T1N0M0	Ⅰ		No	No	No	No	Yes	No	No	No		No	No	Yes	No	No	<0.50	9.61	3.93	219	3.99	125	37.5	55	10.6	28.2	3.08	<2.50	0.19		Yes	No	No	No
Yes	Mal	83	150	55	70	No	Yes	No	No	Yes	Yes					Ⅳ		No	Yes	No	No	Yes	No	No	No		No	No	Yes	No	No	4.2	10.62	5.03	154	3.73	101	35.97	86.2	11	28.7	5.7		1.34	3.88	No	No	No	No
No	Fem	30	155	45	60	No	No	No	No	Yes	Yes					Ⅳ		No	No	No	No	Yes	No	No	No		No	No	Yes	No	No	>100.00	56.46	7.14	120	2.4	68	41.4	190.7	11.1	22.9	2.86		10.47	6.1	No	No	No	No
No	Mal	42	171	66	90	No	No	No	No	Yes	Yes				pT4N1M0	Ⅲ		No	No	No	No	Yes	No	No	No		No	No	Yes	No	No	3.8	13.7	3.68	282	2.22	62	33.92	82.7	13.6	23	2.53	<2.50	5.93		Yes	No	No	No
No	Fem	65	153	47.5	90	No	Yes	No	No	Yes	Yes							No	No	No	No	No	No	No	No		No	No	No	No	No															No	No	No	No
No	Mal	69	159	59	80	No	Yes	No	No	No	No	4	x	0	T4NxM0	Ⅲ		No	No	No	No	No	No	No	No		Yes	No	No	No	No															No	No	No	No
No	Mal	72	150	41	70	No	No	No	No	Yes	No				cT4N3M0	Ⅲ		No	No	No	No	No	No	No	No		No	No	Yes	No	No			2.89	243	2.88	74	29.45	67.2	14.5	31.9	2.23		0.86		No	No	No	No
No	Mal	59	167	66	80	No	No	No	No	Yes	No					Ⅲ		No	No	No	No	No	No	No	No		No	No	Yes	No	No			6.57	256	4.17	106	52.88	84.8	12.5	27.2	3.66		0.34		No	No	No	No
No	Fem	70	146	40	80	No	No	No	No	Yes	No					Ⅲ		No	No	No	No	No	No	No	No		No	No	No	No	No	2.44	128.91	6.83	201	2.92	87	34.06	47.3	13	25.3	3.25		0.55		No	Yes	No	No
No	Mal	53	157	49	80	No	No	No	No	Yes	Yes				T3N2M0	Ⅲ		No	Yes	No	No	No	No	No	No		No	No	Yes	No	Yes	2.3	26.13	11.51	174	4.19	137	42.74	67.9	11.9	24.1	3.25		0.11	3.68	Yes	No	No	No
No	Mal	80	155	46.5	60	No	No	No	No	No	No							No	No	No	No	No	No	No	No		No	No	No	No	No	1.9	464	5.26	155	3.75	121	39.93	87.1	12.6	31.6	3.81		0.46	1.9	No	No	No	No
No	Mal	49	168	71	80	No	No	No	No	Yes	Yes				T4N2M0	Ⅲ		No	No	No	No	Yes	No	No	No		Yes	No	Yes	No	Yes	0.23	8.59	3.49	224	3.91	61	40.26	84.5	11.6	26.9	1.69		0.55		Yes	No	No	No
No	Fem	59	153	60	80	No	No	No	No	Yes	No				pT2N0M0	Ⅱ		No	No	No	No	No	No	No	No		No	No	Yes	No	No	0.8	15.42	9.63	130	3.97	127	43.35	49.1	11.8	26.4	3.66	1.3	0.25		Yes	No	No	No
No	Mal	58	160	52	70	No	No	No	No	Yes	No				T4N0M0	Ⅱ		No	No	No	No	No	No	No	No		No	No	Yes	No	No	1.41	4.51	4.82	207	4.33	139	44.5	91.4	10.6	25.9	2.25		0.81		Yes	No	No	No
No	Mal	54	158	49	70	No	Yes	No	No	Yes	No				pT2N2M1	Ⅳ		No	No	No	No	No	No	No	No		Yes	No	Yes	No	No	2.72	32.98	5.22	213	4.46	129	38.75	78	11.2	25.1	3.21		0.2	4.01	No	No	No	No
No	Fem	58	154	55	70	No	No	No	No	Yes	Yes					Ⅳ		No	Yes	Yes	No	Yes	No	No	No		No	No	Yes	No	No	>100.00	<0.00	5	311	3.75	128	41.29	57.2	12.7	24.4	4.15		1.47		No	No	No	No
No	Mal	71	175	70	90	No	No	No	No	Yes	Yes					Ⅱ		No	No	No	No	No	No	No	No		No	No	Yes	No	Yes			4.27	180	2.78	91	37.13	104.4	12.4	26	2.56		0.68	3.88	Yes	No	No	No
No	Fem	64	153	67	70	No	No	No	No	Yes	No					Ⅲ		No	Yes	Yes	No	Yes	No	No	No		Yes	No	Yes	No	No	2.89	8.62	4.1	121	3.07	107	32.71	60.8	13.3	35.2	2.77		2.29		No	No	No	No
No	Mal	57				No	No	No	Yes	Yes	Yes					Ⅲ		No	No	No	No	No	No	No	No		No	No	Yes	No	No	8	<2.50	5.55	134	4.72	153	44.85	63.9	10.8	21.9	2.54		0.36		Yes	No	No	No
No	Mal	68	167	59	90	No	No	No	No	Yes	No							No	Yes	Yes	No	No	No	No	No		No	No	No	No	No	18.7	50.79	16.73	149	3.96	134	42.8	73.63	11.8	21.3	3.18		0.46		No	No	No	No
No	Fem	49			60	No	No	No	No	Yes	No					Ⅳ		Yes	No	No	No	No	No	Yes	No		No	No	Yes	No	No		>1000.00	6.6	275	4.08	125	32.29	103.4	14.7	22.7	1.99		21.77		No	No	No	No
No	Fem	44	158	57.5	90	No	No	No	No	Yes	No					Ⅳ		No	No	No	No	No	No	No	No		No	No	Yes	No	No	1.6	4.74	3.02	297	4.92	147	39.21	56.4	11.6	25.3	3.89		0.41		No	No	No	No
No	Fem	50	155	60	90	No	No	No	No	No	No							No	No	Yes	No	Yes	No	No	No		No	No	Yes	No	No	0.7	<2.50	3.92	308	3.9	118	47.19	74	11.5	29.1	2.03		0.33	5.13	No	No	No	No
No	Mal	61	173	70	90	No	No	No	No	Yes	No					Ⅰ		No	No	No	No	No	No	No	No		No	No	Yes	No	Yes	1.8	5.7	6.02	148	4.66	147	44.38	69.2	11.1	23.7	1.74		0.15		Yes	No	No	No
No	Fem	55	168	69	70	No	No	No	No	Yes	No					Ⅰ		No	No	No	No	No	No	No	No		Yes	No	Yes	No	No	1.8	4.28	7.84	208	4.53	128	48.46	57.6	10.6	25.2	2.28		0.39		Yes	No	No	No
No	Fem	54	154	52	80	No	No	No	No	No	No							No	No	No	No	No	No	No	No		No	No	Yes	No	No	0.9	16.3	6.81	299	4.09	135	47.1	53.7	11.4	25.6	2.4		1.12		Yes	No	No	No
No	Fem	38	147	56	90	No	No	No	No	Yes	No							No	Yes	No	No	Yes	No	No	No		Yes	No	Yes	No	No	35.42		6.27	212	4.74	102	36.35	47.4	10.3	33.2	3.72		1.23		No	No	No	No
No	Mal	66	156	60	80	No	Yes	No	No	Yes	No					Ⅰ		No	No	No	No	No	No	No	No		Yes	No	Yes	No	Yes	2.3	7.18	3.61	116	2.77	86	36.16	72.4	11.2	20.4	1.78		0.33		Yes	No	No	No
No	Mal	75	155	65	80	No	No	No	No	Yes	Yes					Ⅲ		No	Yes	No	No	Yes	No	No	No		No	No	Yes	No	Yes	2.5	<2.50	5.51	256	2.87	88	33.17	80.1	12.7	29.1	3.27		2.13		Yes	No	No	No
No	Mal	68	170	61	80	No	No	No	No	Yes	Yes					Ⅰ		No	Yes	No	No	No	No	No	No		No	No	Yes	No	Yes	2	10.9	4.97	172	4.19	140	41.36	78.5	10.8	28.8	3.48	1.2	0.29	4.88	Yes	No	No	No
No	Mal	70				No	No	No	No	Yes	No					Ⅳ		No	No	No	No	Yes	No	No	No		No	No	Yes	No	No	2.32	6.75	5.59	386	3.1	66	28.23	61.9	13.6	35.1	3.16		1.59		No	No	No	No
No	Mal	49	163	60	80	No	No	No	No	Yes	No					Ⅱ		No	No	Yes	No	No	No	Yes	No		Yes	No	Yes	No	No	0.6	14.6	4.31	222	4.48	137	43.61	67.8	11.9	26.1	2.64		0.18	4.38	No	No	No	No
No	Mal	51	170	66	80	No	No	No	No	Yes	No					Ⅰ		No	No	No	No	No	No	No	No		No	No	Yes	No	No	1	5.87	5.17	156	4.64	154	39.72	74.3	13.8	25.3	2.02		0.07		Yes	No	No	No
No	Fem	64	145	42	80	No	No	No	No	Yes	Yes					Ⅰ		No	No	No	No	No	No	No	No		No	No	Yes	No	No	0.9	11.6	4.83	209	3.1	84	35.7	53.7	11.4	24.7	2.28		1.05		Yes	No	No	No
No	Mal	70				No	No	No	No	Yes	No							No	No	No	No	No	No	No	No		No	No	No	No	No	10.9	>1000.00	4.32	142	3.73	118		110.3	12.6	25.1	2.77		3.8	6.94	No	No	No	No
No	Mal	54	164	43	70	No	No	No	No	No	No					Ⅱ		No	No	No	No	No	No	No	No		No	No	No	No	No	7.2	16.83	5.42	195	4.46	142	40.49	61.4	11.6	33.4	2.01		0.07		No	No	No	No
No	Mal	61	154	55	90	No	No	No	No	Yes	No					Ⅳ		No	No	No	No	No	No	No	No		No	No	Yes	No	No	11.78	18.7	5.63	305	4.05	131	42.67	78.2	11.6	25.5	3.6		0.86		No	No	No	No
No	Mal	43	168	61	90	No	No	No	No	Yes	No							No	No	No	No	Yes	No	No	No		No	No	Yes	No	No	2.9	2.7	7.04	364	2.92	50	33.14	60.1	13.6	26.9	3.39		0.36		No	No	No	No
No	Fem	75	142	46	90	No	No	No	No	Yes	No					Ⅲ		No	No	Yes	No	No	No	No	No		No	No	Yes	No	Yes			11.41	125	3.38	100	34.7	49.27	12.6	30	3.05		0.21		Yes	No	No	No
No	Mal	58	183	56	80	No	No	No	No	Yes	No					Ⅳ		No	No	No	No	No	No	No	No		No	No	Yes	No	No	3.38	5.23	6.05	160	5.1	155	43.36	64.6	13.1	32	2.15		0.31		No	No	No	No
No	Mal	38	168	62	80	No	No	No	No	Yes	No					Ⅲ		No	No	Yes	No	Yes	No	Yes	No		Yes	No	Yes	No	No	2	<2.50	3.28	166	3.75	105	38.52	59.7	13.2	31.9	1.82	2	1.83		No	No	No	No
No	Mal	64	168	57	90	No	No	No	No	Yes	No					Ⅲ		No	No	No	No	No	No	No	No		No	No	Yes	No	Yes			5.43	137	4.46	140	38.08	72.6	11.6	26.7	2.68		0.42		Yes	No	No	No
No	Fem	78	148	45	90	No	Yes	No	No	Yes	No					Ⅳ		Yes	No	No	No	Yes	No	No	No		Yes	No	Yes	No	No	3.31	16.5	7.54	408	4.52	143	48.47	52	10.5	26.3	3.18		0.31	4.83	No	No	No	No
No	Mal	48	172	70	70	No	No	No	No	Yes	No					Ⅰ		No	No	No	No	No	No	No	No		Yes	No	Yes	No	Yes	3.8	7.78	5.1	197	4.09	147	42.73	70	11.9	25	2.56		0.49		Yes	No	No	No
No	Mal	59	171	56	90	No	No	No	No	Yes	No					Ⅱ		No	Yes	No	No	No	No	No	No		No	No	Yes	No	Yes	3.76	9.11	5.06	170	4.56	150	45.26	82	12.4	34.4	3.21	0.9	0.27	3.62	Yes	No	No	No
No	Fem	71	157	60	90	No	No	No	No	No	No							No	No	No	No	No	No	No	No		No	No	Yes	No	No	1.5		6	277	3.09	97	41.94	57.7	12.2	28.3	3.1		1.01	4.56	No	No	No	No
No	Mal	67	162	65	90	No	No	No	No	Yes	No					Ⅲ		No	No	No	No	No	No	No	No		No	No	Yes	No	No	1.22	7.49	6.66	134	4.43	145	40.04	64.2	10	27.8	2.28	0.9	0.15	3.13	Yes	No	No	No
No	Mal	56	163	60	70	No	No	No	No	Yes	No							No	No	No	No	No	No	No	No		No	No	Yes	No	No	1.93	2.96	5.41	179	5.25	152	47.97	63.7	10.5	21.9	2.8		0.19		Yes	No	No	No
No	Mal	48				No	No	No	No	Yes	No							No	No	No	No	No	No	No	No		Yes	No	Yes	No	No	3.05	8.67	9.3	295	4.35	127	40.36	63.6	14.8	33.4	4.34		0.22	3.84	No	No	No	No
No	Mal	50	175	67	80	No	No	No	No	Yes	Yes					Ⅳ		No	No	No	No	No	No	No	No		Yes	No	Yes	No	No	7	5.52	6.67	265	4.03	116	35.96	66.4	12.6	33.2	3.33		0.41		No	No	No	No
No	Mal	61	176	56	80	No	No	No	No	Yes	No					Ⅲ		No	No	No	No	No	No	No	No		Yes	No	Yes	No	No	1.28	4.05	4.92	213	4.47	141	39.09	68.1	12.9	32.5	3.74		1.52	5.17	No	No	No	No
No	Mal	65	163	56	80	No	No	No	No	Yes	No					Ⅱ		No	No	No	No	No	No	Yes	No		No	No	Yes	No	No	3.68	<2.50	7.06	143	4.33	144	40.88	71.8	12.5	31.8	2.64		0.23		Yes	No	No	No
No	Mal	55	163	64	70	No	No	No	No	Yes	No					Ⅰ		No	No	No	No	No	No	No	No		Yes	No	Yes	No	Yes	2.26	2.77	3.96	155	4.73	152	40.93	69.9	11	30.3	2.49	0.2	0.06		Yes	No	No	No
No	Mal	67	163	55	80	No	Yes	No	No	Yes	Yes					Ⅲ		Yes	No	No	No	Yes	No	No	No		No	No	No	No	No	2.77	71.8	4.57	85	2.58	63	40.3	89	13.5	23.1	1.97		1.94	3.27	No	No	No	No
Yes	Mal	49			60	No	No	No	No	No	Yes							Yes	No	No	No	No	No	Yes	No		No	No	Yes	No	Yes	6.23	277	19.8	216	4.59	123	35.21	290.6	17.4	33.6	2.26		3.2		Yes	No	No	No
No	Mal	65	162	62	90	No	No	No	No	Yes	No					Ⅳ		No	No	No	No	No	No	No	No		Yes	No	Yes	No	No	4.07	21.4	4.52	235	4.33	139	39.88	84.9	11.4	24.9	2.25		0.67	6.49	No	No	No	No
No	Mal	57	172	48	70	No	No	No	No	Yes	No					Ⅳ		Yes	No	No	No	No	No	Yes	No		No	No	Yes	No	No	23.48	209	6.06	133	3.27	108	34.37	67.4	14	34.2	3.81		1.07		No	No	No	No
No	Mal	52	168	65	80	No	No	No	No	Yes	No					Ⅳ		No	No	No	No	No	No	No	No		Yes	No	No	No	No	796.29	<2.50	6.24	198	3.81	116	34.11	119.5	15.4	42.8	2.02		4.85	9.29	No	No	No	No
No	Fem	76	160	35	60	No	Yes	No	No	No	No							No	No	No	No	No	No	Yes	No		No	No	Yes	No	Yes	4.2	<2.50	5.5	84	4.65	118	44.76	53.8	14	37.2	3.1		1	4.37	Yes	No	No	No
No	Mal	57	163	52	70	No	No	No	No	Yes	No					Ⅲ		No	No	No	No	No	No	No	No		No	No	Yes	No	No	3.67	93.3	10.6	283	4.96	145	40.1	83.2	12.6	27.3	3.81		0.35		No	No	No	No
No	Fem	45	156	52	70	No	No	No	No	Yes	No					Ⅳ		No	No	No	No	No	No	No	No		Yes	No	Yes	No	No	3.8	6.16	4.9	238	4.21	129	44.85	63.8	10.6	27.7	2.36		0.14		Yes	No	No	No
No	Mal	64	172	76	90	No	No	No	No	Yes	No							No	No	No	No	No	No	No	No		No	No	Yes	No	Yes	2.45	19.1	4.54	76	4.73	147	41.07	86.6	14.9	32.7	1.76		0.18		Yes	No	No	No
No	Mal	55	154	55	70	No	No	No	No	Yes	No					Ⅳ		No	Yes	Yes	No	No	No	No	No		Yes	No	Yes	No	No	46.5	4.52	4.91	211	3.63	122	42.11	69.2	13.6	30	3.1		1.41	5.37	No	Yes	No	No
No	Mal	55	160	60	90	No	No	No	No	Yes	No					Ⅰ		No	No	No	No	No	No	No	No		Yes	No	Yes	No	No	2.46	6.75	4.84	124	4.39	141	43.13	67.9	11.1	25.3	2.45		0.23		Yes	No	No	No
No	Mal	73	152	48	90	No	No	No	No	Yes	Yes					Ⅱ		No	No	No	No	Yes	No	No	No		Yes	No	Yes	No	No	3.11	11.9	3.28	249	3.93	85	35.77	48.9	12.6	24.3	2.68		0.31	4.6	Yes	No	No	No
No	Mal	78	155	66	70	No	Yes	No	No	Yes	No					Ⅲ		No	Yes	Yes	No	Yes	No	No	No		No	No	No	No	No	1.5		9.01	212	4.23	109	33.33	95.9	13.2	30.9	4.34	4.8	0.71	4.49	No	No	No	No
No	Mal	69	159	54	70	No	No	No	No	Yes	No							No	No	No	No	No	No	Yes	No		No	No	Yes	No	No	3	31.5	7.1	182	4.45	134	40.07	97	12.9	31	3.66		0.74		No	No	No	No
No	Mal	63	160	61	80	No	No	No	No	Yes	No					Ⅰ		No	No	No	No	Yes	No	No	No		Yes	No	Yes	No	No	2	23.23	3.89	137	4.01	135	40.02	68.7	12.6	24.9	2.9	9.8	0.27		Yes	No	No	No
No	Mal	57			60	No	Yes	No	No	Yes	No					Ⅲ		Yes	No	No	No	Yes	No	Yes	No		No	No	Yes	No	No	2.25	38.75	7.65	168	3.18	102	35.91	83.8	12.8	28.4	2.39		0.29	1.96	No	No	No	No
No	Mal	53	160	58	90	No	No	No	No	Yes	No					Ⅱ		No	No	No	No	No	No	No	No		No	No	Yes	No	No			8.4	229	4.64	158	36.31	55.7	12.9	26.6	2.93	1.2	0.33		No	Yes	No	No
No	Mal	57	153	67	80	No	Yes	No	No	Yes	Yes	2	0	0	T2N0M0	Ⅰ	[pT2N0M0ⅠB期]	No	Yes	No	No	No	No	No	No		Yes	No	Yes	No	No	1.23	8.74	7.31	147	4.59	153	41.37	85.3	10.2	25.4	2.6	1.2	0.39	2.85	Yes	No	No	No
No	Mal	66	167	56	80	No	No	No	No	Yes	No					Ⅲ		No	No	No	No	No	No	No	No		No	No	No	No	No	9.13	410.44	4.78	158	3.77	123	37.29	41.2	12.8	29.2	4.44		0.57		No	No	No	No
No	Mal	58	170	92	90	No	No	No	No	Yes	No					Ⅰ		No	No	No	No	No	No	Yes	No		No	No	Yes	No	No	1.5	13.1	4.93	147	4.75	152	47.59	57	琛€鍑?		2.32	3.2	0.08	4.62	Yes	No	No	No
No	Mal	79	156	46	80	No	No	No	No	Yes	No					Ⅳ		No	No	No	No	Yes	No	No	No		No	No	Yes	No	No	4.2	19.04	7.35	174	3.1	87	28.97	71.1	12.9	34.3	4.55		1.23		No	No	No	No
No	Fem	61	153	57	90	No	No	No	No	Yes	No					Ⅰ		No	No	No	No	No	No	No	No		No	No	Yes	No	No	<0.50	15.9	3.88	158	3.96	119	42.11	63.3	11.7	29.6	1.57	0.5	0.37	5.5	Yes	No	No	No
No	Mal	63	154	57	80	No	No	No	No	Yes	No					Ⅲ		No	No	No	No	No	No	No	No		No	No	No	No	No	>100.00	<1.20	6.5	311	3.88	98	38.78	67.9	12.2	25.3	3.98		0.81		No	Yes	No	No
No	Fem	61	145	40	70	No	No	No	No	Yes	No							No	No	No	No	No	No	No	No		No	No	Yes	No	No	1.2	33.05	5.11	195	4.1	125	44.71	55.2	11.1	28.7	2.01		0.14		No	No	No	No
No	Mal	70	160	58	80	No	No	No	No	Yes	No					Ⅳ		No	No	No	No	No	No	No	No		No	No	Yes	No	No	3.3		6.02	220	3.73	122	40.21	61	13.1	28.7	3.33		2.46	4.82	No	No	No	No
No	Mal	72	170	58	80	No	No	No	No	Yes	No					Ⅳ		No	No	No	No	No	No	No	No		Yes	No	No	No	No	126.26	272.74	7.21	228	4.02	110	36.65	70.4	12.2	26.9	3.16		1.22		No	No	No	No
No	Mal	67	160	55	70	No	No	No	No	Yes	No					Ⅱ		No	No	No	No	No	No	No	No		No	No	Yes	No	No	4.4	9.78	4.96	201	3.77	107	39.97	77.9	12.4	25.1	2.86		2.21		Yes	No	No	No
No	Mal	66	165	65	90	No	No	No	No	Yes	No					Ⅳ		No	No	No	No	No	No	No	No		Yes	No	Yes	No	No	6.32	12.36	5.85	205	4.09	128	38.01	72	11	28.6	2.4		0.66		Yes	No	No	No
No	Fem	39	158	40	70	No	No	No	No	Yes	Yes					Ⅳ		No	No	No	No	No	No	No	No		No	No	No	No	No			6.61	260	3.42	107	37.82	61.8							No	No	No	No
No	Mal	81			60	No	Yes	No	No	Yes	Yes					Ⅳ		No	No	No	No	No	No	No	No		No	No	Yes	No	No	17.6		3.6	251	3.54	115	31.66	140.1	14.8	29.5	5.25		4.39	3.21	Yes	No	No	No
No	Mal	78	150	50	70	No	No	No	No	Yes	No					Ⅱ		No	No	No	No	No	No	No	No		No	No	Yes	No	No	0.8		6.38	213	4.56	99	37.88	68	13	33.2	3.39		0.32		No	No	No	No
No	Fem	55	153	45	70	No	No	No	No	Yes	No							No	No	No	No	No	No	Yes	No		No	No	No	No	No	1.9	12.1	3.33	98	4.06	124	40.42	40.8	11.2	28.2	2.46		0.55		No	No	No	No
No	Mal	68	165	52	80	No	No	No	No	Yes	No							No	No	No	No	No	No	No	No		No	No	No	No	No	45.17	232.71	4.88	228	4.42	138	43.64	52	13.1	31	3.66		2.03		No	No	No	No
No	Mal	71	156	49	60	No	No	No	No	Yes	No							No	No	No	No	Yes	No	No	No		No	No	No	No	No	24.22	>700.00	3.1	289	3.62	103	34.36	69.3	13.6	36.7	4.89		1.42	2.9	No	No	No	No
No	Fem	51	155	56	80	No	No	No	No	No	Yes							No	No	No	No	No	No	No	No		No	No	Yes	No	No	0.6	9.82	4.87	524	2.41	65	43.06	48.8	12.7	22.3	2.56		0.66		Yes	No	No	No
No	Mal	64	168	69	70	No	No	No	No	Yes	No					Ⅳ		No	No	No	No	Yes	No	No	No		No	No	No	No	No	4.12	10.17	3.43	174	3.75	69	36.95	61.9	12.6	25.7	2.68		0.41		No	No	No	No
No	Mal	56	155	54	70	No	No	No	No	Yes	No					Ⅳ		No	No	No	No	No	No	No	No		No	No	Yes	No	No	6.39	109.82	15.1	418	4.77	134	30.65	73.7	12.6	31.5	4.24		3.94		No	No	No	No
No	Mal	69	164	54	90	No	No	No	No	Yes	No					Ⅳ		No	No	No	No	No	No	No	No		Yes	No	Yes	No	No	2.83		6.21	132	3.71	112	36.12	68.4	12.5	36.7	3.1		0.48		No	No	No	No
No	Fem	62	157	58.5	70	No	No	No	No	Yes	No					Ⅳ		No	No	No	No	No	No	No	No		No	No	No	No	No	1.48	255.96	4.68	173	4.65	142	47.21	51.3	13.1	29.5	3.66		2.8	4.48	No	No	No	No
No	Mal	74	175	69	80	No	No	No	No	Yes	No					Ⅲ		No	No	No	No	No	No	No	No		Yes	No	No	No	No	0.91	6.83	3.59	434	3.44	74	37.14	80.3	11.4	26.1	3.7		1.08	3.8	No	No	No	No
No	Mal	55	164	65	80	No	No	No	No	Yes	No					Ⅲ		No	No	Yes	No	No	No	No	No		No	No	Yes	No	No	<0.50	3.98	4.33	171	4.22	120	35.74	47.5	13.6	28.5	3.03		1.33	3.17	No	No	No	No
No	Mal	69	175	49	80	No	No	No	No	Yes	Yes					Ⅲ		No	No	No	No	No	No	No	No		No	No	Yes	No	No	2.46	15.17	5.21	195	4.2	125	32.36	104.1	10.3	19.4	2.22		0.9		Yes	No	No	No
No	Mal	77	160	45	80	No	No	No	No	No	No							No	No	No	No	No	No	No	No		No	No	Yes	No	No	1.15	12.21	5.5	104	3.42	111	36.9	91.5	11.8	26.9	3.39		3.89	3.92	No	No	No	No
No	Mal	74	156	49	80	No	No	No	No	Yes	No					Ⅳ		No	No	No	No	No	No	No	No		No	No	No	No	No	3.09		6.48	211	4.23	135	40.25	87.8	11.7	30.3	2.9		0.28		No	Yes	No	No
No	Mal	48	160	65	90	No	No	No	No	Yes	No					Ⅲ		No	No	Yes	No	Yes	No	No	No		No	No	Yes	No	No	0.6	16.28	4.3	213	5.39	107	45.99	59	13.3	31.7	3	0.9	0.57		Yes	No	No	No
No	Mal	48	166	70	60	No	No	No	No	No	Yes					Ⅲ		Yes	No	No	No	No	No	No	No		No	No	Yes	No	No	<0.50	59.45	4.18	213	3.33	58	38.28	56.4	13.3	26.1	2.72		2.49		No	No	No	No
No	Fem	54	150	47.5	70	No	No	No	Yes	Yes	No					Ⅳ		No	No	No	No	Yes	No	No	No		No	No	No	No	No	8.22	175.89	3.13	102	2.55	82	32.82	44.7	12.6	27.7	3.2		3.17		No	No	No	No
No	Mal	60	170	69	90	No	No	No	Yes	Yes	Yes					Ⅱ		No	No	No	No	No	No	No	No		No	No	Yes	No	No	1.45	73.66	8.24	305	3.04	71	36.21	62.15	11.2	27.3	3.55		0.22		Yes	No	No	No
No	Mal	42	165	55	80	No	No	No	No	Yes	No					Ⅱ		No	No	No	No	No	No	No	No		No	No	No	No	No			5.97	153	3.27	116	38.86	82.61							No	No	No	No
No	Fem	56				No	No	No	No	No	No					Ⅳ		No	No	No	No	No	No	No	No		No	No	No	No	No															No	No	No	No
No	Mal	84	155	50	60	No	No	No	No	Yes	No					Ⅳ		No	No	No	No	Yes	No	No	No		Yes	No	No	No	No	19.9	8.01	6.35	276	3.55	104	30.59	46.6	13.4	29.2	4.21		0.9		No	No	No	No
No	Mal	62	159	56	70	No	No	No	No	Yes	No							No	No	No	No	No	No	No	No		Yes	No	Yes	No	No	16.34	25.91	5.58	202	4.52	139	41.71	67.1	12.7	31.5	4.24		0.34		No	No	No	No
No	Fem	55	156	40	30	No	No	No	No	Yes	No					Ⅳ		No	No	No	No	No	No	No	No		No	No	No	No	No	>100.00	10.07	6.3	382	3.87	116	36.66	63.6	12.6	16	4.62		3.94	3.25	No	No	No	No
No	Mal	61	165	62	90	No	No	No	No	Yes	No					Ⅳ		No	No	No	Yes	No	No	No	No		Yes	No	Yes	No	No	>100.00	>700.00	5.94	141	3.95	117	38.79	61	10.6	22.5	3.33		10.24		No	No	No	No
No	Mal	68	170	63	90	No	No	No	No	No	Yes					Ⅳ		Yes	No	No	No	Yes	No	No	No		No	No	No	No	No			8.04	63	2.34	61	37.03	83.6	12.6	27.9	1.33		9.91		No	No	No	No
No	Mal	72	165	55	60	Yes	Yes	No	No	Yes	No					Ⅳ		No	No	No	No	No	No	No	No		No	No	Yes	No	No	<0.50		4.56	137	3.69	113	35.68	49	12.1	28.6	2.71		1.01	6.24	No	No	No	No
No	Mal	62	164	66	90	No	No	No	No	Yes	No					Ⅳ		No	Yes	No	No	No	No	No	No		No	No	Yes	No	No	16.57		9.52	130	4.23	127	38.9	73.2	11.8	23.5	3.46		2.57		No	No	No	No
No	Mal	75	164	66	90	No	No	No	Yes	Yes	No					Ⅲ		No	No	No	No	No	No	No	No		Yes	No	Yes	No	No			6.14	129	5.64	150	42.52	68.3	13.3	34.1	4.21		0.45		No	No	No	No
No	Mal	72	174	61	70	No	No	No	No	Yes	Yes							No	No	No	No	No	No	No	No		No	No	No	No	No	<0.50		5.44	265	3.68	81	35.96	72.6	12.6	32.1	3.79		0.26		No	No	No	No
No	Mal	67	165	50	90	No	No	No	No	Yes	No					Ⅲ		No	No	No	No	No	No	No	No		Yes	No	Yes	No	No	>100.00	6.3	5.58	274	4.26	124	36.51	51.9	12.9	28.9	3.95		0.9		Yes	No	No	No
No	Mal	73	178	52	70	No	No	No	No	Yes	No							Yes	No	No	No	Yes	No	No	No		No	No	No	No	No	<0.50	7.31	2.89	43	1.92	58	25.65	76.9	14.8	48.5	1.82		0.17		No	No	No	No
No	Mal	68	160	47	80	No	No	No	No	Yes	No					Ⅲ		No	No	No	No	No	No	No	No		No	No	Yes	No	No			3.89	212	4.15	120	38.2	61.3	12.3	26.3	3.57		0.18		Yes	No	No	No
No	Mal	73	155	52	80	No	No	No	No	Yes	No					Ⅲ		No	No	No	No	No	No	No	No		Yes	No	Yes	No	No			6.47	219	4.12	136	40.36	35.45	12.6	24.3	4.03		1.12		No	No	No	No
No	Fem	47	157	54.5	90	No	No	No	No	Yes	No					Ⅰ		No	No	No	No	Yes	No	No	No		Yes	No	Yes	No	No	<0.50	9.4	5.86	207	3.5	98	37.8	52.5	13.7	36.2	2.23		0.15		Yes	No	No	No
No	Fem	47	157	54.5	90	No	No	No	No	Yes	No					Ⅰ		No	No	No	No	No	No	No	No		Yes	No	Yes	No	No	<0.50	9.4	5.86	207	3.5	98	37.8	52.5	13.7	36.2	2.23		0.15		Yes	No	No	No
No	Mal	62	157	47	90	No	No	No	No	Yes	Yes					Ⅲ		No	No	No	No	No	No	No	No		No	No	Yes	No	No	0.67	57.99	4.48	144	3.4	121	40.19	46.4	11.5	26.8	2.71		0.24		Yes	No	No	No
No	Mal	79	157	61.5	70	No	No	No	No	Yes	No					Ⅳ		No	No	No	No	No	No	No	No		No	No	No	No	No	40.18		7.35	275	3.37	90	37.26	90.9	12.2	26.6	5.48		2.65		No	No	No	No
No	Mal	59	170	70	80	No	Yes	No	No	Yes	Yes					Ⅳ		No	Yes	Yes	No	Yes	No	No	No		No	No	Yes	No	No	3.99	6.76	7.39	470	4.03	119	40.45	64.8	14.6	32.4	5.39		2.26	3.76	No	Yes	No	No
No	Mal	73	150	45	80	No	No	No	Yes	Yes	No							No	No	No	No	No	No	No	No		No	No	No	No	No	1.64	5.92	8.68	259	3.91	127	48.18	72.6	12.6	26.1	4.21		0.9		No	No	No	No
No	Mal	46	167	70	70	No	No	No	No	Yes	No					Ⅳ		No	No	No	No	No	No	No	No		Yes	No	Yes	No	No	2.47	32.66	6.68	151	4.82	156	46.48	69.8	12.1	24.2	3.31		0.51	2.7	No	No	No	No
No	Mal	89			80	Yes	No	No	No	Yes	No					Ⅳ		No	No	No	No	No	No	No	No		No	No	Yes	No	No	<0.50	6.09	3.48	117	3.33	95	34.8		14.2	27.7	3.31		1.54	2.86	No	No	No	No
No	Mal	61	168	70	80	No	Yes	No	No	No	No							No	No	No	No	No	No	No	No		No	No	Yes	No	No	4.43	9.3	6.42	323	3.39	93	41.44	63.6	11.6	29.5	4.29		0.41		No	No	No	No
No	Mal	68	1.63	56	90	No	No	No	No	Yes	No					Ⅳ		No	No	No	No	No	No	No	No		No	No	Yes	No	No			6.31	172	4.23	134	44.05	77.3	12.4	32.6	4.21		0.47		No	No	No	No
Yes	Mal	62	165	64	90	No	Yes	No	Yes	Yes	Yes					Ⅳ		No	Yes	No	No	No	No	No	No		No	No	Yes	No	No	8.4		5.14	286	3.64	78	34.19	70.8	11.2	26.1	4.8		0.51	1.74	Yes	No	No	No
No	Mal	62	164	68	90	No	No	No	No	No	No					Ⅲ		No	No	No	No	No	No	No	No		No	No	Yes	No	No	1.82	10.19	5.22	179	4.53	142	38.97	67.67	12.3	25.4	1.95		0.26		Yes	No	No	No
No	Mal	45	174	59	80	No	No	No	No	Yes	No					Ⅲ		Yes	No	No	No	No	No	No	No		No	No	Yes	No	No	0.92	16.37	11.55	223	5.27	163	49.41	87	12.1	33.5	3.39		0.15	3.53	Yes	No	No	No
No	Mal	59	175	80	90	No	No	No	No	Yes	No							No	No	No	No	No	No	No	No		No	No	No	No	No	1.3	10.02	5.8	207	4.8	153	48.06	69.4	11.6	31.3	3.2		0.11		No	No	No	No
No	Mal	67	165	48	70	No	No	No	No	Yes	No					Ⅳ		No	No	No	No	No	No	No	No		No	No	No	No	No	92.49	>700.00	5.45	265	4.67	133	38.39	67.3	12.2	31.5	2.66		2.26		No	No	No	No
No	Mal	39	165	61	70	No	No	No	No	No	No							No	No	No	No	No	No	No	No		No	No	Yes	No	No	4.14	2.43	6.02	265	4.02	131	45.97	73.2	12.6	29.1	2.8		0.15		Yes	No	No	No
No	Fem	40	160	45	80	No	No	No	No	Yes	No					Ⅰ		No	No	No	No	Yes	No	No	No		Yes	No	Yes	No	No	2.34	22.23	4.49	239	3.88	101	48.71	44.2	11.3	25.1	2.89		1.44		No	No	No	No
No	Mal	68	169	64	70	No	Yes	No	No	Yes	No					Ⅳ		Yes	No	Yes	No	Yes	No	No	No		Yes	No	No	No	No	1.8	7	5.53	108	3.86	121	39.65	65.6	13.6	36.3	4.51		0.92		No	No	No	No
No	Mal	74			70	No	No	No	No	Yes	No					Ⅳ		No	Yes	No	No	No	No	No	No		No	No	No	No	No	>100.00	>700.00	13.1	111	2.97	96	28.83	27.3	13.1	33.4	2.23		30.77		No	No	No	No
No	Mal	73			70	No	No	No	No	Yes	Yes					Ⅲ		No	No	No	No	No	No	No	No		No	No	No	No	No	1.22	3.5	9.26	233	2.52	77	34.76	74.5	13.6	23.7	3.64		0.28	2.94	No	No	No	No
No	Mal	62	157	47	90	No	No	No	No	No	No							No	No	No	No	No	No	Yes	No		No	No	No	No	No	2.02	10.93	4.16	214	4.56	151	41.76	59.8	12.2	33.2	4.03	0.8	0.13		Yes	No	No	No
No	Mal	57	177	78	70	No	No	No	No	No	Yes					Ⅳ		No	No	No	No	No	No	No	No		No	No	Yes	No	No	5.71	242.88	2.88	166	3.61	66	38.64	72.5	13.8	32.1	3.44		0.69		Yes	No	No	No
No	Mal	67	163	44.5	70	No	No	No	No	Yes	No							No	No	Yes	No	Yes	No	No	No		No	No	No	No	No	1.07	21.88	3.59	169	3.36	112	34.82	60.5	13	34	2.94		0.37	3.86	No	No	No	No
No	Mal	68	164	55	60	No	No	No	No	Yes	No					Ⅳ		No	No	No	No	Yes	No	No	No		No	No	Yes	No	No	191.03	>700.00	8.13	248	3.26	99	32.54	40.5	12.2	27.8	2.26		2.52		No	No	No	No
No	Mal	50	170	55	80	No	Yes	No	No	Yes	No					Ⅳ		Yes	No	No	No	No	No	No	No		No	No	No	No	No			5.19	279	3.52	115	35.95	56.4	10	23.9	3.88		1.52		No	No	No	No
No	Fem	21	168	40	70	No	No	No	No	No	Yes							No	No	Yes	No	Yes	No	No	No		No	No	Yes	No	No			7.85	705	2.94	50	30.94	36.3	12.8	25.1	2.91		0.94	2.58	Yes	No	No	No
No	Fem	46	158	53	90	No	No	No	No	No	No					Ⅰ		No	No	No	No	No	No	No	No		No	No	Yes	No	No	1.39	9.2	6.1	212	4.54	143	44.83	44.6	10.8	20.9	2.75	0.5	0.66	4.38	Yes	No	No	No
No	Fem	49	156	32	80	No	No	No	No	Yes	No					Ⅳ		Yes	No	Yes	No	No	No	No	No		No	No	Yes	No	Yes	2.96	8.71	3.34	101	3.42	114	38.46	49	12.1	27.2	2.05		0.57		No	No	No	No
No	Mal	67	159	57	80	No	No	No	No	Yes	No					Ⅱ		No	No	No	No	No	No	No	No		No	No	Yes	No	No	13.09		4.47	90	5.02	155	41.1	65.83	12.1	22.4	3.71		0.57	4.43	Yes	No	No	No
No	Mal	86	163	49	60	No	Yes	No	No	No	No							Yes	No	No	No	Yes	No	No	No		No	No	Yes	No	No	4.61	38.93	3.91	126	3	88	36.2	80	13.1	31.9	3.57		0.97	4.4	No	No	No	No
No	Fem	78	148	44	80	No	No	No	No	Yes	Yes					Ⅲ		No	No	No	No	Yes	No	No	No		Yes	No	No	No	No	10.62	6.18	6.17	147	2.52	64	24.74	49.58	11.3	34.7	3.8	8.2	2.48		No	No	No	No
No	Fem	76	150	40	70	No	Yes	No	No	Yes	No					Ⅳ		No	No	No	No	No	No	No	No		No	No	Yes	No	No	57.51	161.56	11.56	210	3.75	102	27.88	47.2	13.4	31.9	3.8		2.49	2.56	No	No	No	No
No	Mal	56	167	62	80	No	No	No	No	Yes	No					Ⅳ		No	No	No	No	No	No	No	No		Yes	No	Yes	No	No	1105.75	211	5.06	233	3.8	115	34.93	68.9	13	29	4.21		2.34		No	Yes	No	No
No	Mal	56	145	48	90	No	No	No	No	Yes	No					Ⅱ		No	No	No	No	No	No	No	No		No	No	No	No	No			6.76	200	5.02	167	39.75	56.37	12.3	29	2.98		0.27		No	No	No	No
No	Mal	64	170	70	90	No	No	No	No	Yes	No					Ⅳ		No	No	No	No	No	No	No	No		No	No	No	No	No	>1500.00	60.7	4.89	109	4.07	117	30.26	116.9	15	29.7	1.36		18.92		No	No	No	No
No	Mal	74	166	56	80	No	No	No	No	Yes	No					Ⅳ		No	Yes	No	Yes	Yes	No	No	No		No	No	No	No	Yes	13.61		7.36	276	4.45	144	38.85	49.4	13	27.7	2.85		1.23	1.92	No	No	No	No
No	Mal	45	168	58	70	No	No	No	No	No	No							Yes	No	No	No	No	No	No	No		No	No	No	No	No	3.11	10.78	5.61	121	3.54	96	36.78	77.27	10.2	29.4	4.94		2.36		Yes	No	No	No
No	Mal	39	159	66	90	No	No	No	No	Yes	No					Ⅲ		No	No	No	No	No	No	No	No		No	No	Yes	No	No	<0.50	9.4	4.56	216	4.41	132	39.55	60.7	12.4	28.6	2.89		0.09		Yes	No	No	No
No	Fem	74	146	48	70	No	Yes	No	No	No	No							No	No	No	No	Yes	No	No	No		No	No	Yes	No	No	0.59	8.34	4.94	311	2.5	58	33.92	41.6	10.6	24.3	4.38		0.46		No	No	No	No
No	Mal	75	151	54.5	80	No	No	No	No	No	No							No	No	No	No	No	No	No	No		No	No	Yes	No	No	2.97	27.46	5.21	153	4.69	144	38.46	47.3	10.5	22.8	3.13	1.2	0.1	3.43	Yes	No	No	No
No	Fem	51	155	41	70	No	No	No	No	Yes	No					Ⅳ		No	No	No	No	No	No	No	No		No	No	Yes	No	No	<0.50	7.25	5.6	238	4.53	129	43.12	42.2	12.7	26.5	3.09		0.93		No	No	No	No
No	Mal	63	170	56	80	No	No	No	Yes	Yes	Yes					Ⅳ		Yes	No	No	No	Yes	No	No	No		No	No	Yes	No	No	9.6	>700.00	6.88	303	3.29	73	29.13	55.2	13.2	22.8	4.31		0.68		No	No	No	No
No	Mal	70	151	51	90	No	No	No	No	Yes	No							No	No	No	No	No	No	No	No		No	No	Yes	No	No	1.96		4.69	214	4.2	130	39.1	64.3	12.3	29.5	3.31	7	0.32	4.44	Yes	No	No	No
No	Fem	59	145	45	70	No	No	No	No	Yes	No					Ⅲ		No	No	No	No	No	No	No	No		No	No	Yes	No	No	1.37	32.07	4.69	279	3.4	99	37.98	50.3	10.6	21.5	2.29		0.47		Yes	No	No	No
No	Mal	70	160	70	80	No	No	No	No	Yes	No					Ⅳ		No	No	No	No	No	No	No	No		No	No	Yes	No	No	>500.00	6.92	8.94	367	4.2	97	38.81	62.5	12.9	21.7	4.85		0.42	4.04	No	No	No	No
No	Fem	58	145	55	90	No	No	No	No	Yes	No							No	No	No	No	No	No	No	No		No	No	No	No	No	1.61	17.22	3.22	249	4.05	90	37.73	50.7	13.1	24.7	3.87		0.94	5.57	No	No	No	No
No	Mal	79	156	53	80	No	No	No	No	Yes	No					Ⅲ		No	No	No	No	No	No	No	No		Yes	No	No	No	No	0.66	8.5	7.43	206	5.22	152	36.29	63.2	12.6	22.4	4.21		0.63		No	No	No	No
No	Fem	64	157	152	90	No	No	No	No	Yes	No							No	No	No	No	No	No	No	No		No	No	Yes	No	No			4.86	255	4.24	126	36.89	58.7	12.1	23.3	2.55		0.52		No	No	No	No
No	Mal	57	170	55	70	No	Yes	No	No	Yes	No				T2N0M0	Ⅰ		No	No	Yes	No	No	No	No	No		No	No	No	No	No	2.82	7.32	4.09	62	3.85	122	41.08	73.2	12.9	29.1	3.79		0.78		No	No	No	No
No	Fem	75	150	55	80	No	Yes	No	No	No	No	4	3a	0	T4N3aM0	Ⅲ		No	No	No	No	Yes	No	No	No		No	No	No	No	No	2.71	28.22	6.77	164	3.54	107	41.7	51	11.5	24.1	2.62	<2.50	0.23	3.44	No	No	No	No
No	Mal	60	166	49	70	No	No	No	No	Yes	No					Ⅳ		Yes	Yes	No	No	Yes	No	Yes	No		No	No	Yes	No	No	54.99		8.22	141	3.82	119	39.85	66.9	16.3	****.*	0.41		9.78	4.28	No	No	No	No
No	Mal	65	172	60	70	No	No	No	No	Yes	No					Ⅳ		No	Yes	No	No	Yes	No	No	No		Yes	No	Yes	No	No	19.57	3.66	4.34	302	3.88	95	39.78	74.7	12.6	26.6	4.12		5.35	1.72	No	No	No	No
No	Fem	72	155	40	70	No	No	No	No	No	No							No	No	No	No	No	No	No	No		No	No	No	No	No	2.86	16.59	3.31	249	3.39	100	30.9	43.6	12.7	31.2	4.98		1.13		No	No	No	No
No	Fem	42	159	59	90	No	No	No	No	Yes	No					Ⅳ		No	No	No	No	Yes	No	No	No		Yes	No	Yes	No	No	2.3	209.07	9.32	252	4.42	122	41.6	38.9	12.1	22	4.12		2.09	4.18	Yes	No	No	No
No	Mal	58	170	60	80	No	No	No	No	Yes	No					Ⅲ		No	No	No	No	No	No	No	No		No	No	Yes	No	No	1.65	6.33	2.89	112	3.69	114	42.54	68.1	12.7	28.2	2.45		0.66	1.52	Yes	No	No	No
No	Mal	67	160	65	80	No	No	No	No	Yes	Yes	3	1	0	T3N1M0	Ⅱ		No	Yes	Yes	No	Yes	No	No	No		No	No	Yes	No	No	0.64	32.73	8.77	171	5.05	151	40.8	61.7	10.1	30.4	6.46	<2.50	0.19		Yes	No	No	No
No	Mal	51	162	50	70	No	No	No	No	Yes	No				T4N2M1	Ⅳ		No	No	No	No	No	No	No	No		No	No	Yes	No	No	1.11	6.67	5.05	113	4.46	145	44.78	93.3	11.9	28.8	3.33		0.2		Yes	No	No	No
No	Mal	64	166	59	80	No	No	No	No	Yes	Yes					Ⅳ		No	No	No	No	No	No	No	No		Yes	No	Yes	No	No	1.74	7.86	8.7	110	3.71	116	36.23	82.8	12.5	32.2	3.9		1.17	3.66	Yes	No	No	No
No	Fem	55	147	41	90	No	No	No	No	Yes	Yes					Ⅳ		No	No	No	No	No	No	No	No		No	No	Yes	No	No	>100.00	30.65	6.05	116	4.76	145	44.71	51.3	12	30.1	3.04		1.29	3.24	Yes	No	No	No
Yes	Fem	80	145	60	80	No	Yes	No	No	No	No							No	Yes	No	No	Yes	No	No	No		No	No	No	No	No	0.67	12.74	4.61	242	4.05	113	40.1	62.3	11.5	23.3	2.82	7.6	2.83	4.21	No	No	No	No
No	Mal	19	170	45	90	No	No	No	No	No	No					Ⅳ		No	No	Yes	No	No	No	No	No		No	No	Yes	No	No	0.65	4.83	5.28	171	4.39	120	44.32	61	14.5	35.9	3.5		1.37	3.1	No	No	No	No
No	Fem	56	155	45.5	80	No	No	No	No	Yes	No					Ⅲ		No	No	Yes	No	Yes	No	Yes	No		Yes	No	Yes	No	No	2.9	25.66	3.39	194	3.97	116	49.51	48.4	13.6	29.3	3.09	0.6	0.09	3.47	No	No	No	No
No	Fem	56	159	38	70	No	No	No	No	Yes	No					Ⅲ		No	No	Yes	No	Yes	No	No	No		No	No	Yes	No	No	1.05	42.59	6.84	181	3.42	82	41.81	50	12.1	22.5	2.02	0.5	0.44		No	No	No	No
No	Fem	76	150	45	80	No	No	No	No	Yes	No					Ⅲ		No	No	No	No	No	No	No	No		No	No	Yes	No	No			4.82	114	3.72	110	42.72	44.9	12.9	29.3	3.64		0.27		No	No	No	No
No	Mal	73	166	65	80	No	No	No	No	Yes	No					Ⅳ		No	No	No	No	No	No	No	No		No	No	No	No	No	1.73	8.4	4.39	107	3.75	141	44.06	47.1	11.9	27.8	1.82	2.7	0.41		No	Yes	No	No
No	Mal	77	158	45	80	No	No	No	No	Yes	No					Ⅲ		No	No	No	No	No	No	No	No		Yes	No	Yes	No	No	1.6	9.96	5.58	124	4.36	125	41.43	64.5	12.2	25.1	4.98		0.4	3.23	Yes	No	No	No
No	Mal	55	172	68	90	No	No	No	No	Yes	No				T4N3M0	Ⅲ		No	Yes	No	No	Yes	No	No	No		No	No	Yes	No	No	2.71	193.01	4.09	180	4.37	135	39.08	57.9	10.3	23.1	2.99		0.21	5.06	Yes	No	No	No
No	Mal	80	170	70	80	No	Yes	No	No	Yes	Yes							No	No	No	No	Yes	No	No	No		No	No	No	No	No	2.04		4.66	241	2.58	50	34.04	86.8	13.1	22.2	3.2		0.79	3.51	No	No	No	No
No	Fem	76			40	No	Yes	No	Yes	Yes	No					Ⅳ		No	No	No	No	No	No	No	No		No	No	No	No	Yes	2.26	12.19	6.62	439	3.76	105	36.31	40.7	12.7	32.8	5.11		7.06	3.92	No	No	No	No
No	Fem	41	155	49	90	No	No	No	No	Yes	Yes					Ⅰ		No	No	No	No	No	No	No	No		No	No	Yes	No	No	0.73	6.45	6.01	310	2.87	72	40.06	57.5	11.6	25.5	2.17		0.88		Yes	No	No	No
No	Fem	56	155	47	90	No	No	No	No	Yes	No							No	No	No	No	Yes	No	No	No		No	No	No	No	No	0.97	20.11	5.17	98	3.71	106	37.06	54.3	11.5	25.9	3.8		0.53		No	No	No	No
No	Mal	59	168	68	90	No	No	No	No	Yes	No					Ⅳ		No	No	No	No	No	No	No	No		No	No	No	No	No	2.29	7.02	4.82	155	4.95	140	43.67	91.5	10.9	22.9	3.21		0.27		No	No	No	No
No	Mal	48	160	45	80	No	No	No	No	Yes	No				T4N1M0	Ⅲ		No	No	No	No	No	No	No	No		No	No	Yes	No	No	4.06		7.71	153	4.38	140	44.64	61.6	12.1	26.3	2.75		0.27		Yes	No	No	No
No	Fem	46	159	49	80	No	No	No	No	Yes	Yes				T2N0M0	Ⅰ		No	No	No	No	No	No	No	No		No	No	No	No	No	1.48		4.41	231	3.77	81	37.08	38.1	12.6	30.8	3.49		0.29		No	No	No	No
No	Mal	51	167	52	80	No	No	No	No	Yes	No					Ⅳ		No	No	Yes	No	No	No	No	No		No	No	Yes	No	No	>100.00	121.81	8.24	150	5.55	143	44.36	65.2	11.6	24.7	3.9		3.69		No	Yes	No	No
No	Mal	79	157	55	80	No	Yes	No	No	Yes	No					Ⅱ		No	No	No	No	No	No	No	No		Yes	No	No	No	No	1.96	4.09	5.77	187	4.57	135	40.85	69.6	10.8	26.5	2.99		0.64		No	No	No	No
No	Mal	68	168	50	70	No	No	No	No	Yes	No				T4N3M0	Ⅳ		No	Yes	No	No	No	No	No	No		No	No	Yes	No	No	45.16	>700.00	5.99	287	4.17	126	40.49	52.9	13.2	34.8	5.11		1.07	2.48	No	No	No	No
Yes	Mal	49	168	54.5		No	No	No	No	Yes	Yes					Ⅳ		No	No	No	No	No	No	No	No		No	No	Yes	No	No			18.69	211	3.73	102	36.3	69.2	13.8	25.4	3.79		8.83		No	No	No	No
No	Mal	68	147	58	80	No	Yes	No	No	Yes	Yes					Ⅳ		No	No	No	No	No	No	No	No		Yes	No	Yes	No	No	84.82	31.05	10.95	206	5.81	123	43.46	72	11.6	25.5	5.67		1.93	3.88	No	No	No	No
No	Mal	67	165	57	80	No	No	No	No	Yes	No					Ⅲ		No	No	No	No	No	No	No	No		No	No	Yes	No	No	1.3	66.36	15.62	347	3.94	118	41.51	63.6	12.4	28.1	4.85	0.9	0.25		Yes	No	No	No
No	Fem	71	157	52	80	No	No	No	No	No	No				T3N0M0	Ⅱ		No	No	No	No	No	No	No	No		No	No	No	No	No	16.4	34.38	5.6	206	2.87	61	40.5	58.4	12.2	25.3	4.73		0.44		No	No	No	No
No	Mal	38	163	47	80	No	No	No	No	No	No				T4N0M0	Ⅱ		No	No	No	No	No	No	No	No		No	No	No	No	No	<0.50	19.79	2.65	192	4.14	122	46.56	64.8							No	No	No	No
No	Fem	38	163	47	70	No	No	No	No	Yes	No					Ⅲ		No	No	No	No	No	No	No	No		No	No	Yes	No	No			5.1	252	3.6	84	39.02	57.7							No	Yes	No	No
No	Fem	67	146	38	70	No	No	Yes	No	Yes	No							No	No	No	No	No	No	No	No		No	No	Yes	No	No	0.8	9.18	4.24	197	3.91	120	43.06	54.2	12.1	24.1	2.79		0.66		No	No	No	No
No	Mal	63	172	52.5	70	No	No	No	No	Yes	No					Ⅳ		No	No	No	No	No	No	No	No		No	No	Yes	No	No			6.28	140	3.68	111	34.89	58.8	13.5	33	4.01		0.33		No	No	No	No
No	Fem	56	151	56	90	No	No	No	No	Yes	No					Ⅲ		No	No	No	No	No	No	No	No		No	No	Yes	No	No	<0.50	8.53	7.32	240	4.33	126	41.85	47.3	12.1	27.9	2.85	1.5	0.22	4.69	Yes	No	No	No
No	Mal	67	157	61	60	No	No	No	No	Yes	No					Ⅳ		Yes	Yes	Yes	No	No	No	No	No		No	No	No	No	No	77.82	>700.00	8.97	234	2.25	60	21.74	45.4	18.2	27.7	2.33		2.48	0.32	No	No	No	No
No	Mal	63	182	61	70	No	No	No	No	Yes	No							No	No	No	No	No	No	No	No		No	No	Yes	No	No	>100.00		5.97	245	4.05	109	39.91	60.9	12.2	30	2.79		0.7		No	No	No	No
No	Fem	71	160	69	80	No	Yes	No	No	Yes	Yes					Ⅱ		No	No	No	No	No	No	No	No		No	No	Yes	No	No	1.52	2.95	4.94	194	3.37	90	37.89	47.1	11.8	27.8	3.88	1.5	0.37	2.46	Yes	No	No	No
No	Fem	73	145	70	80	No	Yes	No	No	Yes	No	4	1	0	T4N1M0	Ⅲ		No	No	No	No	No	No	No	No		No	No	No	No	No	4.71	16.21	4.92	169	4.41	138	43.6	63.9							Yes	No	No	No
No	Mal	50	170	61	90	No	No	No	No	Yes	No					Ⅲ		No	No	No	No	Yes	No	Yes	No		No	No	Yes	No	No	<0.50	7.79	6.14	75	4.65	142	46.49	66.1	10.1	23	2.4	9.2	0.18		Yes	No	No	No
No	Fem	40	155	60	70	No	No	No	No	Yes	No					Ⅲ		No	No	Yes	No	No	No	No	No		Yes	No	Yes	No	No	<0.50	43.64	5.03	249	3.05	105	33.16	59.7	12.5	24.8	2.97		1.07	3.43	No	No	No	No
No	Mal	59	170	65	70	No	No	No	No	Yes	Yes					Ⅰ		No	No	No	No	No	No	No	No		Yes	No	Yes	No	No	<0.50	21.82	3.7	146	4.67	142	48.42	148.5	11.5	29.9	2.11		0.18	5.33	Yes	No	No	No
No	Mal	67	160	50	70	No	No	No	No	Yes	No					Ⅳ		Yes	Yes	Yes	No	No	No	No	No		No	No	No	No	No	1.92	3.75	3.78	159	4.06	128	37.51	61.4	12.1	28.5	2.85	3.2	0.78	2.92	No	No	No	No
No	Mal	75	176	75	80	No	Yes	Yes	No	Yes	No					Ⅲ		No	No	No	No	No	No	No	No		Yes	No	Yes	No	No	10.33	15.55	5.33	236	4.32	129	33.87	66.4	12.2	23.5	3.25		1.53	3.59	No	No	No	No
No	Mal	88	165	55	90	No	No	Yes	No	No	Yes							No	No	No	No	Yes	No	No	No		No	No	Yes	No	No	1.04	7.7	3.71	200	3.32	72	37.85	64.8	12.9	29.1	2.74		0.29	2.92	Yes	No	No	No
No	Mal	69	158	41	60	No	Yes	No	No	Yes	No					Ⅳ		Yes	No	No	No	No	No	No	No		No	No	Yes	No	No	>100.00	146.23	11.1	243	3.72	120	38.27	70.4	13.1	27.7	3.88		6.5		No	No	No	No
No	Fem	40	151	50	80	No	No	No	No	Yes	No					Ⅲ		No	No	Yes	No	No	No	No	No		No	No	Yes	No	No	<0.50	17.45	4.25	193	4.3	130	41.54	58.1	10.8	24.3	2.86	0.6	0.1		Yes	No	No	No
No	Mal	59	164	65	90	No	No	No	No	No	No							No	No	No	No	No	No	No	No		No	No	Yes	No	No	<0.50	9.26	4.05	148	3.79	128	39.24	77.3	12	28	3.57		1.51	4.38	No	No	No	No
No	Mal	55			40	No	Yes	No	No	Yes	No					Ⅳ		Yes	Yes	No	No	Yes	No	No	No		Yes	No	No	No	No	3.5	131.3	6.5	177	4.53	144	48.6	110.1	12.6	20.4	3.49		0.9		No	No	No	No
No	Mal	54	162	62	90	No	No	No	No	Yes	Yes					Ⅰ		No	Yes	No	No	No	No	No	No		Yes	No	Yes	No	No	<0.50	5.87	5.2	163	4.26	142	45.05	61.6	10.3	26.5	3.09		0.13		Yes	No	No	No
No	Mal	75	157	50	60	No	Yes	No	Yes	Yes	Yes					Ⅳ		No	No	No	No	Yes	No	No	No		No	No	Yes	No	No	1.55		8.68	239	2	58	30.35	73.6							No	Yes	No	No
No	Mal	63	162	47	90	No	No	No	No	Yes	No					Ⅳ		No	No	No	No	No	No	No	No		No	No	Yes	No	No	6.91		5.23	134	3.65	95	40.44	63.9	10.6	24.3	3.21		0.41		No	No	No	No
No	Fem	74	140	43	60	No	No	No	No	Yes	No					Ⅲ		Yes	No	No	No	No	No	No	No		No	No	Yes	No	No	<0.50	38.72	7.58	237	3.52	108	36.65	75.4	11.7	23.7	2.48		13.85		No	No	No	No
No	Mal	75	152	44.5	70	No	No	No	No	Yes	No					Ⅳ		No	No	No	No	No	No	No	No		No	No	No	No	No	20.51	6.52	3.39	177	3.26	102	32.69	63.7	13.3	32.3	3.66		1.79		No	No	No	No
No	Mal	74	164	53	90	No	No	No	No	Yes	No					Ⅳ		No	No	No	No	Yes	No	No	No		No	No	Yes	No	No			2.85	67	1.63	63	39.74	54	12.1	27.2	1.98		2.34		No	No	No	No
No	Fem	60	163	58	90	No	Yes	No	No	Yes	No					Ⅲ		No	No	No	No	No	No	No	No		No	No	Yes	No	No	2.43	24.38	3.35	107	4.62	137	49.93	53.4	10.1	21.5	2.52	2.6	0.23		No	No	No	No
No	Mal	70	170	61	90	No	No	No	No	Yes	No					Ⅳ		No	No	No	No	No	No	No	No		Yes	No	Yes	No	No	8.45		5.84	233	4.94	156	43.79	75.6	11.9	28.3	2.58		0.63		No	No	No	No
No	Mal	75	150	48	60	No	No	No	No	Yes	Yes					Ⅳ		Yes	No	No	No	Yes	No	Yes	No		No	No	No	No	No	8.88		6.1	326	4.24	113	32.3	76.6	13.1	27.7	1.78		3.19		No	No	No	No
No	Mal	73	159	48	70	No	No	No	No	Yes	No					Ⅱ		No	No	No	No	No	No	No	No		No	No	Yes	No	No	2.9	3.02	4.47	191	3.89	120	44.9	73.1	10.3	20.4	3.58		0.39		No	No	No	No
No	Fem	44	151	47	90	No	No	No	No	Yes	No					Ⅳ		No	No	No	No	No	No	No	No		No	No	Yes	No	No	4.2	4.41	6.64	168	4.14	133	39.2	50.7	11.3	22.7	3.25		0.73		Yes	No	No	No
Yes	Mal	54	162	60	80	No	No	No	No	Yes	No					Ⅳ		No	No	No	No	Yes	No	No	No		Yes	No	Yes	No	No	15.2	>700.00	5.4	307	3.5	87	36.51	66.4	12.1	26.4	3.25		8.09		No	No	No	No
No	Mal	69	165	60	80	No	No	No	No	No	No							No	No	No	No	Yes	No	No	No		No	No	Yes	No	No			8.53	432	3.49	86	45.84	68.8	11.5	23.7	2.57		0.73		No	No	No	No
No	Mal	52	168	74.5	80	No	Yes	No	No	Yes	Yes					Ⅱ		No	No	No	No	No	No	No	No		Yes	No	Yes	No	No	8.26	14.96	8.42	273	5.65	167	50.55	62.9	10.1	23.9	4.01		0.22	2.51	Yes	No	No	No
No	Mal	70	167	58	80	No	No	No	No	Yes	Yes	2	1	0	T2N1M0	Ⅱ		No	No	No	No	Yes	No	No	No		No	No	Yes	No	No	<0.50	12.42	7.05	754	3.48	106	40.53	59.6	12.1	28.8	4.45	3.5	1.18	3.22	Yes	No	No	No
No	Fem	67	140	40	80	No	No	No	No	Yes	No					Ⅰ		No	No	No	No	Yes	No	No	No		Yes	No	Yes	No	No	1.59	8.07	4.68	216	3.63	95	37.82	41.2	10.3	24.7	2.97		0.05	5.22	Yes	No	No	No
No	Mal	64	166	51	90	No	No	No	No	Yes	No					Ⅲ		No	No	No	No	No	No	No	No		No	No	No	No	No	2.26	8.64	6.24	175	4.32	142	41.25	51.9	11.7	28.5	4.01		0.5		No	No	No	No
No	Fem	55	158	60	70	No	No	No	No	Yes	Yes					Ⅳ		Yes	No	No	No	Yes	No	No	No		No	No	Yes	No	No	0.64	3.83	7.67	255	1.63	39	38.01	61.01	10.1	22.8	3.09		1.29	3.02	No	No	No	No
No	Mal	56	165	59	80	No	No	No	No	Yes	No					Ⅳ		No	No	No	No	No	No	No	No		Yes	No	No	No	No	>100.00	14.41	6.13	234	3.68	108	32.73	74.6	12.7	28.4	4.01		5.86		No	No	No	No
No	Mal	66	170	60	80	No	No	No	No	Yes	No					Ⅲ		No	No	No	No	No	No	No	No		No	No	No	No	No	1.19	4.92	8.57	92	3.98	123	39.21	77.4	12.5	27.5	3.57		1.23		No	No	No	No
No	Fem	61	150	45	80	No	No	No	No	Yes	No					Ⅲ		No	No	No	No	No	No	No	No		Yes	No	Yes	No	No	2.25	4.88	4.66	192	3.9	124	38.02	46.3	11.7	29.2	2.4		0.22		Yes	No	No	No
No	Mal	71	164	49	70	No	No	No	No	Yes	No					Ⅱ		No	No	No	No	Yes	No	No	No		No	No	Yes	No	No	1.21	7.56	13.46	358	3.15	68	35.14	59.8	13.1	28	4.13		1.86		No	No	No	No
No	Mal	62	160	53	90	No	No	No	No	Yes	No					Ⅲ		No	No	No	No	No	No	No	No		Yes	No	No	No	No	3.32	98.02	5.65	231	4.4	138	39.81	80.5	12.1	27.5	2.11	5	0.73	3.58	No	No	No	No
No	Fem	74	147	55	80	No	Yes	No	No	Yes	No					Ⅲ		No	No	No	No	No	No	No	No		Yes	No	No	No	No	1.11	3.52	6.91	156	4.5	126	43.81	53.7	9.9	23.6	3.42		0.24		No	No	No	No
No	Mal	63	157	72	80	No	No	No	No	Yes	No					Ⅲ		No	No	No	No	No	No	No	No		No	No	Yes	No	No	7.89	64.01	6.02	328	4.32	130	41.35	79.6	12.4	26.1	3.88		0.18	4.81	Yes	No	No	No
No	Fem	84			70	No	Yes	No	No	Yes	Yes					Ⅲ		No	No	No	No	Yes	No	No	No		No	No	Yes	No	No	0.99	14.36	6.8	303	2.88	65	32.67	55.8	12.9	19.5	3.77		5.22	3.77	No	No	No	No
No	Mal	76	168	58	90	No	No	No	No	Yes	No					Ⅰ		No	No	No	No	No	No	No	No		Yes	No	Yes	No	No	1.5	10.61	4.35	157	4.32	125	39.74	56.3	12.3	33	2.3		0.14		Yes	No	No	No
No	Mal	58	154	51	60	No	No	No	No	No	No					Ⅰ		No	No	No	No	No	No	No	No		No	No	No	No	No	<0.50	15.33	2.57	100	3.81	127	31.75	75.6	12.9	28.5	1.12		1.03	1.54	No	No	No	No
No	Fem	37	157	47	90	No	No	No	No	Yes	No					Ⅳ		No	No	No	No	No	No	No	No		Yes	No	Yes	No	No	6.85	<1.20	6.31	263	3.48	101	41.06	42	9.6	23.9	5.24		2.94		No	No	No	No
No	Fem	46	155	57	90	No	No	No	Yes	Yes	No					Ⅲ		No	No	No	No	No	No	No	No		No	No	Yes	No	No	0.97	7.56	4.9	152	4.65	133	39.85	39.1	11.6	24.4	2.37		0.12		Yes	No	No	No
No	Mal	76	172	55	70	No	Yes	No	No	Yes	No							No	No	Yes	No	Yes	No	No	No		Yes	No	Yes	No	No	1.16	21.53	7.73	330	3.81	89	38.68	71.9	12.6	31.2	4.01		0.3	4.6	No	No	No	No
No	Mal	47	170	50	70	No	No	No	No	Yes	No					Ⅳ		No	No	No	No	No	No	No	No		No	No	Yes	No	No	1.57	18.54	5.1	213	3.35	119	27.42	70.3	11.5	26.3	2.52		1.89		No	No	No	No
No	Fem	39	155	59	70	No	No	No	No	No	No					Ⅱ		No	No	No	No	No	No	No	No		Yes	No	Yes	No	No	<0.50	22.93	7.58	197	3.99	119	40.57	55.8	13.3	29.6	2.4		0.14		Yes	No	No	No
No	Mal	58	155	48	80	No	No	No	No	Yes	No					Ⅳ		No	No	No	No	Yes	No	No	No		Yes	No	Yes	No	No	<0.50	9.08	6.89	229	4.94	114	52.2	51.6	10.7	26.1	3.77		0.08		Yes	No	No	No
No	Mal	90			60	No	No	No	No	Yes	Yes					Ⅱ		Yes	No	No	No	Yes	No	No	No		No	No	Yes	No	No	1.14	11.7	5.5	228	4.1	64	40.4	58.9	12.3	25.9	2.23		0.41		No	No	No	No
No	Mal	70	160	63	80	No	No	No	No	Yes	No					Ⅳ		No	Yes	No	No	No	No	No	No		Yes	No	Yes	No	No	0.6	13.84	4.21	178	4.64	146	43.62	44.6	11.6	25.7	4.41		0.75	5.13	No	No	No	No
No	Fem	60	158	58	80	No	No	No	No	Yes	No					Ⅰ		No	No	No	No	Yes	No	No	No		Yes	No	Yes	No	No	130.6	24.01	4.38	140	3.81	126	43.28	60.5	12.4	26.1	2.53	1.7	0.44	4.48	Yes	No	No	No
No	Mal	58	170	55	80	No	No	No	No	No	Yes					Ⅲ		Yes	Yes	No	No	Yes	No	No	No		No	No	No	No	No	<0.50	7.15	9.3	597	1.63	36	28.28	68.9							No	No	No	No
No	Mal	56	156	63	90	No	No	No	No	Yes	No							No	No	No	No	No	No	No	No		No	No	Yes	No	No			5.16	84	4.75	157	41.35	136.7	12.2	30.8	2.3		0.19		Yes	No	No	No
No	Fem	61	154	52	60	No	No	No	No	Yes	Yes					Ⅳ		Yes	No	No	No	Yes	No	No	No		No	No	Yes	No	No	<0.50	10.02	6.3	127	3.11	56	34.05	39.5	12	42.3	2.01		>10.00		No	No	No	No
No	Fem	64			70	No	Yes	No	No	No	No							No	No	No	No	Yes	No	No	No		No	No	Yes	No	No	5.4	22.78	8.11	101	2.76	81	33.69	596.4	12	37.5	4.88		9.82	4.35	No	No	No	No
No	Fem	63	152	44	90	No	No	No	No	Yes	No					Ⅱ		No	No	No	No	No	No	No	No		No	No	Yes	No	No			6.81	215	3.92	126	41.09	56.1							Yes	No	No	No
No	Mal	58	175	90	70	No	No	No	No	Yes	No					Ⅱ		No	Yes	Yes	No	Yes	No	No	No		Yes	No	Yes	No	No	1.47	11.05	5.49	196	5.24	160	42.8	75.5	12	28.5	2.58	5.2	0.2		Yes	No	No	No
No	Mal	53	164	58	90	No	No	No	No	Yes	No					Ⅲ		No	No	No	No	No	No	Yes	No		No	No	Yes	No	No	<0.50	4.03	3.98	117	4.41	141	40.03	71.9	11.4	25.9	2.17	4.8	0.16	5.48	Yes	No	No	No
No	Mal	57				No	No	No	No	Yes	No					Ⅲ		No	No	No	No	No	No	No	No		Yes	No	No	No	No	2.63	10.52	5.48	219	4.6	117	37.08	54.5	10.6	26.4	4.01		0.22		No	No	No	No
No	Fem	48	159	60	80	No	No	No	No	Yes	Yes					Ⅳ		No	No	No	No	Yes	No	No	No		Yes	No	Yes	No	No	<0.50	153.88	3.19	255	3.4	65	32.43	40	13.1	31.2	3.04		0.44		Yes	No	No	No
No	Mal	58	167	62	80	No	No	No	No	Yes	No					Ⅲ		No	No	No	No	Yes	No	No	No		No	No	No	No	No	<0.50	35.55	4.25	164	4.19	136	39.62	55	9.8	23.1	2.44	26.1	0.34		Yes	No	No	No
No	Fem	74	155	63	80	No	Yes	No	Yes	No	No					Ⅳ		No	Yes	No	No	No	No	No	No		No	No	Yes	No	No	<0.50	9.68	7.9	295	4.14	118	37.5	50.9	12.3	26.4	3.66		0.85	4.97	No	No	No	No
No	Mal	63	160	55	90	No	No	No	No	No	No					Ⅰ		No	Yes	No	No	Yes	No	No	No		Yes	No	Yes	No	No	<0.50	9.44	7.22	205	3.91	132	39.08	50.6	11.3	24.3	3.88	1.2	0.58	4.3	Yes	No	No	No
No	Mal	57	183	60	80	No	No	No	No	Yes	No					Ⅳ		No	No	No	No	No	No	No	No		Yes	No	No	No	No	6.37	65.14	9.42	369	4.03	120	34.52	64	12.6	27.9	4.71		2.92		No	No	No	No
No	Mal	41	166	56	90	No	No	No	No	Yes	No					Ⅳ		Yes	No	No	No	No	No	No	No		No	No	No	No	No	43.98	253.62	7.58	54	4.52	138	40.63	66.5	13.9	29.5	1.92		>5.00		No	No	No	No
No	Mal	59	165	80	80	No	No	No	No	No	No					Ⅲ		No	No	No	No	No	No	No	No		No	No	Yes	No	No	2.23		7.57	125	5.26	161	48.75	63.6	11.2	24.8	4.56		0.29		No	No	No	No
No	Fem	72			30	No	No	No	No	Yes	No							No	No	No	No	No	No	Yes	No		No	No	No	No	No	1.4	34.61	7.2	165	3.4	104	36.27	45.5	11.3	24.5	2.58		8.2		No	No	No	No
No	Mal	82	160	71	80	No	Yes	No	No	No	No							No	No	No	No	No	No	No	No		No	No	No	No	No	1.59	3.51	6.59	200	4.27	131	40.67	74.2	12.4	27.1	1.98		1.49		No	No	No	No
No	Mal	59	165	60	90	No	No	No	No	Yes	No					Ⅱ		No	No	No	No	No	No	No	No		No	No	No	No	No	30.57	15.26	4.74	182	4.41	143	42.79	67.1	10	25.4	2.57		0.43		No	No	No	No
No	Fem	70	155	53	90	No	No	No	No	Yes	No					Ⅱ		No	No	No	No	No	No	No	No		No	No	Yes	No	No	0.91	12.48	4.63	199	4.02	125	37.93	51.1	12.6	29.6	2.33		0.15		Yes	No	No	No
No	Mal	67	165	67	80	No	Yes	No	Yes	No	Yes	1b	0	0	T1bN0M0	Ⅰ		No	No	No	No	No	No	Yes	No		No	No	Yes	No	Yes	2.69	5.44	5.23	140	4.66	150	43.5	74.7	10.7	28.9	2.87	<2.50	0.34	3.17	Yes	No	No	No
No	Mal	57	168	48	70	No	No	No	No	Yes	No					Ⅳ		No	No	No	No	No	No	No	No		No	No	Yes	No	No	5.82	>700.00	2.88	99	4.32	129	38.74	71.6	11.1	29.3	2.58		0.8		No	No	No	No
No	Fem	67	150	47	70	No	No	No	No	Yes	No					Ⅱ		No	No	No	No	No	No	No	No		No	No	Yes	No	No	0.8	24.97	6.39	227	4.44	136	41.83	41.5	12.3	23.2	2.85		0.3		Yes	No	No	No
No	Mal	61	156	47	70	No	No	No	No	Yes	No					Ⅳ		No	No	No	No	No	No	No	No		No	No	Yes	No	No	>100.00	21.18	7.78	307	3.12	89	35.15	79.4	12.5	27.2	5.06		1.72		No	No	No	No
No	Mal	62	165	58	70	No	No	No	No	Yes	No					Ⅲ		No	No	No	No	Yes	No	No	No		No	No	Yes	No	No	1.1	12.03	5.7	168	4.33	133	42.43	96	11.9	26.3	3.77	0.8	0.25	4.54	Yes	No	No	No
No	Mal	37	165	82	80	No	No	No	No	Yes	No							No	No	No	No	No	No	No	No		No	No	Yes	No	No	1.3	4.05	5.58	164	5.5	177	43.7	66.6	10.5	29	涔崇硿琛€		0.09		Yes	No	No	No
No	Mal	70	164	60	70	No	No	No	No	Yes	No							No	No	No	No	No	No	No	No		No	No	Yes	No	No	4.3	20.84	5.21	255	4.58	129	42.44	60.2	10.2	26.9	2.44		0.92		No	No	No	No
No	Mal	40	170	49	70	No	No	No	Yes	Yes	Yes							No	No	No	No	No	No	No	No		No	No	No	No	No	54.3	<1.20	5.89	313	3.38	106	39.13	45.2	14	26	1.61		17.15		No	No	No	No
No	Mal	65	155	51	90	No	No	No	No	Yes	No					Ⅳ		No	No	No	No	No	No	No	No		No	No	No	No	No	4.3	>700.00	8.57	317	4.85	136	36.9	80	12.5	25.9	2.44		>5.00		No	No	No	No
No	Mal	65	165	42	90	No	No	No	No	Yes	No					Ⅳ		No	No	No	No	No	No	No	No		Yes	No	Yes	No	No	3.41		7.33	227	4.44	139	39.48	57.5	12.3	24.3	4.71		0.4		Yes	No	No	No
No	Mal	56	164	59	90	No	Yes	No	No	Yes	No					Ⅰ		No	No	No	No	No	No	No	No		Yes	No	Yes	No	No	2.98	8.46	6.2	376	3.84	82	39.9	60.9	12.3	24.7	3.66		0.22		Yes	No	No	No
No	Mal	65	164	53.5	90	No	No	No	No	Yes	No					Ⅲ		Yes	No	No	No	No	No	No	No		Yes	No	Yes	No	No	3.27		5.57	149	4.16	137	37.84	72.49	13.8	26.1	3.04		0.73	3.92	No	No	No	No
No	Fem	72	160	45	70	No	No	No	No	Yes	No					Ⅳ		Yes	No	No	No	Yes	No	No	No		No	No	Yes	No	No	1.93	54.5	6.31	228	2.48	65	33.88	39.7	10.5	23.1	4.56		1.79	3.76	No	No	No	No
No	Fem	75	152	42	80	No	No	No	No	No	No					Ⅲ		No	No	No	No	Yes	No	Yes	No		Yes	No	No	No	No	1.06	4.97	4.5	399	4.09	87	41.09	52.7	12.2	20.7	2.91		0.2		No	No	No	No
No	Mal	57	160	63	90	No	No	No	No	Yes	No					Ⅲ		No	No	No	No	No	No	No	No		No	No	Yes	No	No			3.57	164	4.58	123	38.72	57.7	11	25.2	2.85		0.12		Yes	No	No	No
No	Mal	77	159	55.5	80	No	Yes	No	No	Yes	No					Ⅱ		Yes	No	No	No	Yes	No	No	No		Yes	No	No	No	No	>100.00	3.91	6.33	227	2.97	75	32.54	61.7	13.5	25.9	4.71		3.25		No	No	No	No
No	Mal	73	162	60	80	No	No	No	No	Yes	Yes					Ⅲ		No	Yes	No	No	No	No	No	No		No	No	Yes	No	Yes	0.8	22.24	8.08	249	4.87	144	46.1	70.8	13.8	32.2	2.36	2.8	0.29	3.4	Yes	No	No	No
No	Mal	82	152	51	70	No	No	No	No	Yes	No							No	No	No	No	No	No	No	No		No	No	No	No	No	0.76		4.28	116	4.5	140	36.73	83.9	12.1	28.7	3.35		7.7		No	No	No	No
No	Mal	48	164	61	80	No	No	No	No	No	No					Ⅳ		No	No	No	No	No	No	No	No		No	No	No	No	No			5.1	51	4.73	127	37.95	65.6	12.5	26.9	2.68		0.79		No	No	No	No
No	Mal	61	158	51	80	No	Yes	Yes	No	Yes	No					Ⅲ		No	No	No	No	No	No	No	No		Yes	No	No	No	No	2.58	1.45	4.04	300	3.51	109	42.89	70.1	12.5	23	2.97		0.31		No	No	No	No
No	Fem	52	162	39	70	No	No	No	No	Yes	No					Ⅳ		No	No	No	No	No	No	No	No		Yes	No	Yes	No	No	0.81	38.47	2.33	257	3.19	98	42.09	50	12.7	25	2.14		0.23		Yes	No	No	No
No	Mal	50	170	53	90	No	No	No	No	Yes	No					Ⅳ		No	No	No	No	No	No	No	No		Yes	No	Yes	No	No	1.79	4.2	7.44	265	4.68	137	37.76	72.7	10.4	20.7	4.13		0.27		Yes	No	No	No
No	Mal	57	164	51	70	No	No	No	No	Yes	Yes					Ⅲ		No	No	No	No	Yes	No	No	No		No	No	Yes	No	No	12.27	15.46	4.8	281	2.25	45	29.09	73.6	11.7	23.8	3.88		1.45		No	No	No	No
No	Mal	65	158	56	80	No	Yes	No	No	No	No					Ⅲ		No	No	No	No	No	No	No	No		No	No	Yes	No	No	1.06	6.4	3	115	4.51	147	42.78	68.9	12.9	25.4	2.23	0.3	0.16	3.74	No	No	No	No
No	Mal	64	170	88	90	No	No	No	No	No	No							No	Yes	No	No	Yes	No	No	No		No	No	No	No	No	2.83	33.81	7.75	238	3.79	73	39.66	77.9	11.7	31.3	3.93	1	0.63	2.98	Yes	No	No	No
No	Fem	65	150	37.5	70	No	No	No	No	No	No					Ⅱ		No	No	No	No	Yes	No	No	No		No	No	No	No	No	1.96	30.79	4.8	107	3.04	99	35.21	58.5	12.7	28.2	2.27		2.33		No	No	No	No
No	Mal	81			80	No	No	No	No	Yes	No					Ⅳ		No	No	No	No	No	No	No	No		No	No	No	No	No	2.4	12.49	5.88	289	3.02	106	37.58	65.1	13.1	29.5	3.32		0.45		No	No	No	No
No	Mal	60	163	51	80	No	No	No	No	Yes	No					Ⅱ		No	No	Yes	No	No	No	No	No		No	No	Yes	No	No	1.44	2.66	5.74	176	4.15	127	44.72	61	12.9	37.5	3.66		0.47	2.61	Yes	No	No	No
No	Mal	51	168	74	90	No	No	No	No	Yes	No					Ⅱ		No	No	No	No	Yes	No	No	No		Yes	No	Yes	No	No	2.32	6.71	7.8	276	3.24	103	42.93	81	12.5	23.8	2.17	0.3	0.19	3.84	Yes	No	No	No
No	Fem	42	160	55	90	No	No	No	No	Yes	No					Ⅲ		No	No	No	No	Yes	No	No	No		Yes	No	No	No	No	1.4	39.09	6.79	320	4.11	107	33.67	43.2	11.7	26.9	5.24	5	0.85		Yes	No	No	No
No	Fem	59	156	35	70	No	No	No	No	Yes	No					Ⅲ		No	No	No	No	No	No	No	No		No	No	No	No	No	>100.00		4.09	138	3.89	108	39.27	55.2	11.9	23.3	3.18		2.99		No	No	No	No
No	Fem	52	151	60	80	No	No	No	No	Yes	No					Ⅳ		No	No	No	No	No	No	No	No		Yes	No	Yes	No	No	23.38	>700.00	9.8	192	4.3	127	33.97	48.5	12.6	25.1	5.24		3.32	2.62	No	No	No	No
No	Mal	57	158	54	80	No	No	No	No	Yes	No					Ⅳ		No	No	No	No	Yes	No	No	No		Yes	No	Yes	No	No	0.7	3.54	6.12	268	3.84	90	37.93	82.2	11.1	26.4	3.03		1.92	2.9	No	No	No	No
No	Fem	69	141	35	70	No	Yes	Yes	No	No	No							No	No	No	No	No	No	No	No		No	No	No	No	No	1.9	9.63	5.07	629	3.33	90	36.16	48.1	10.6	23.6	4.01		1.12		No	No	No	No
No	Mal	74	164	49	80	No	No	No	No	Yes	Yes							No	No	No	No	Yes	No	No	No		No	No	Yes	No	No	17.88	117.11	5.12	261	3.36	68	36.76	69	12.3	28.5	2.01		4.7		No	No	No	No
No	Fem	59	142	36	80	No	No	No	No	No	No							No	No	No	No	No	No	Yes	No		No	No	No	No	No	2.77	14.72	4.46	160	3.49	106	44.67	47.2	12.5	28.1	2.66		0.43		No	No	No	No
No	Mal	69	159	55	70	No	No	No	No	Yes	No					Ⅳ		No	No	No	No	No	No	No	No		Yes	No	No	No	No	3.76	31.14	5.7	206	5.04	150	37.62	84.5	12.9	28.3	4.71		0.44		No	No	No	No
No	Fem	81	146	62	60	No	Yes	No	No	No	No							No	Yes	No	No	No	No	No	No		No	No	Yes	No	No	49.68	198.85	4.38	298	3.71	100	35.53	61.4	12.9	28	2.79		>5.00		No	No	No	No
No	Fem	41	155	62	90	No	No	No	No	Yes	No							No	No	No	No	No	No	No	No		No	No	No	No	No		13.06	11.3	315	4.64	144	45.29	72.3	12.8	23.7	3.4		1.93		No	No	No	No
No	Fem	58	155	47	70	No	No	No	No	No	No					Ⅲ		No	Yes	Yes	No	Yes	No	No	No		Yes	No	Yes	No	No	4.76	43.91	5.44	416	3.59	83	42.82	56.5	10.6	23.6	2.86	7.6	2.08	1.09	No	No	No	No
No	Fem	49	156	44	80	No	No	No	No	No	No					Ⅲ		No	No	No	No	No	No	No	No		Yes	No	No	No	No	0.92	10.51	8.08	108	2.85	93	38.36	61.4	14.3	30.7	3.75		3.51		No	No	No	No
No	Mal	63	162	66	90	No	No	No	No	Yes	No					Ⅱ		No	No	No	No	No	No	No	No		No	No	Yes	No	No	1.29		8.29	175	5.41	160	39.67	78.22	11.3	28.6	2.91		0.45		Yes	No	No	No
No	Mal	65	168	59	80	No	Yes	No	No	No	No					Ⅳ		No	No	No	No	Yes	No	No	No		No	No	No	No	No	1	4.15	7.6	313	3.85	90	36.7	78.6	11.5	24	5.06		0.81		No	No	No	No
No	Mal	67	170	50	80	No	No	No	No	Yes	Yes					Ⅲ		Yes	No	No	No	Yes	No	No	No		Yes	No	Yes	No	No	70.37	187.88	8.77	496	3.43	64	31.34	61.4	12.7	27.8	5.24		1.15		No	No	No	No
No	Mal	61	170	71	80	No	Yes	No	No	Yes	No					Ⅳ		No	No	No	No	No	No	No	No		Yes	No	Yes	No	No	1.46	99.45	10.35	270	4.25	126	40.13	62.9	14	32.3	4.71		1.06	0.62	No	No	No	No
No	Mal	48	167	56	80	No	No	No	No	Yes	No					Ⅲ		No	No	No	No	No	No	No	No		Yes	No	Yes	No	No	61.17	14.28	4.67	201	4.56	115	36.99	67.9	12.1	34.9	4.01		1.64		Yes	No	No	No
No	Mal	42			40	No	No	No	No	Yes	No					Ⅳ		No	No	No	No	No	No	Yes	No		No	No	Yes	No	No	76.53	41.95	19.4	261	3.82	115	31.73	54.5	13.3	26.2	5.06		5.02	2.72	No	No	No	No
No	Mal	61	169	77.5	70	No	No	No	Yes	Yes	No					Ⅰ		No	No	No	No	No	No	Yes	No		No	No	Yes	No	No	2.83	21.6	4.54	90	4.92	156	45.02	86.9	11.8	26.2	2.68		0.17		Yes	No	No	No
Yes	Mal	67	170	65	80	No	Yes	No	Yes	Yes	No	X	X	1	TXNXM1	Ⅳ		No	No	No	No	Yes	No	No	No		No	No	No	No	No	23.2	>700.00	10.92	265	4.21	119	42.8	59.1	12.3	28	4.01	19.8	8.12		Yes	No	No	No
No	Mal	61			60	No	No	No	No	Yes	No					Ⅳ		Yes	Yes	No	No	Yes	No	No	No		No	No	Yes	No	No		<1.20	9.53	369	2.52	66	27.69	65.9	14.3	20.7	3.4		>5.00	3.16	No	No	No	No
No	Mal	67	165	48	70	No	No	No	No	Yes	No					Ⅳ		No	No	No	No	No	No	No	No		No	No	No	No	No	3.09	<1.20	7	80	4.42	137	39.26	81.5	13.1	26.8	2.11		2.82		No	No	No	No
No	Mal	61	160	57	90	No	No	No	No	Yes	Yes					Ⅲ		No	No	No	No	No	No	No	No		No	No	Yes	No	No	2.97		15.8	97	3.7	122	34.34	73	13.6	23.3	2.14		8.43	3.91	Yes	No	No	No
No	Mal	56			60	No	No	No	No	Yes	No							No	No	No	No	Yes	No	No	No		No	No	No	No	No			5.9	248	3.15	70	22.21	74.5	14.6	30.1	2.44		3.3		No	No	No	No
No	Fem	43	150	56	90	No	No	No	No	Yes	No					Ⅳ		No	No	Yes	No	No	No	No	No		Yes	No	Yes	No	No	1.01	28.56	5.18	269	5.36	113	50.16	49.4	10.3	22.4	3.15	5.7	0.88	4.8	No	No	No	No
No	Mal	72	163	56.5	70	No	No	No	No	Yes	No					Ⅲ		No	No	No	No	Yes	No	No	No		No	No	No	No	No	3.94	>700.00	3.68	126	3.17	82	35.72	76.8	10.5	23.9	2.97		3.12		No	No	No	No
No	Mal	42	147	42	80	No	No	No	No	Yes	No							No	No	No	No	No	No	No	No		Yes	No	Yes	No	No	2.03	12.68	4.17	188	4.37	154	50.47	47	10.1	25.6	2.19		0.25		Yes	No	No	No
No	Mal	58	155	40	70	No	No	No	No	Yes	No					Ⅳ		No	No	No	No	No	No	No	No		No	No	Yes	No	No	3.03		13.5	188	4.56	128	43.92	78.4	12.7	27.2	4.13		0.65		No	No	No	No
No	Mal	67	162	60	80	No	Yes	No	No	Yes	No							Yes	No	Yes	No	No	No	No	No		No	No	Yes	No	No	<0.50		9.7	338	5.42	131	45.14	118.1	10.9	25.4	4.71	15.6	2.15	4.75	No	No	No	No
No	Fem	63	166	43	70	No	No	No	No	Yes	No					Ⅳ		Yes	Yes	No	No	Yes	No	No	No		No	No	No	No	No	6.48	6.64	7.04	396	3.5	66	24.85	45.2	10.6	24	2.51		1.19		No	No	No	No
No	Fem	41	159	48.5	70	No	No	No	No	Yes	No					Ⅳ		No	No	No	No	No	No	No	No		Yes	No	Yes	No	No	1.36	309.5	6.81	290	3.58	102	44.56	89.6	13.7	26.9	5.65		1.8		No	No	No	No
No	Mal	61	160	61	70	No	No	No	No	No	Yes							Yes	No	No	No	No	No	No	No		No	No	No	No	No			12	177	3.12	64	35.58	51.4	13.5	22.2	3.4		0.3		No	No	No	No
No	Mal	89			70	No	Yes	No	No	Yes	Yes					Ⅲ		Yes	No	No	No	No	No	No	No		No	No	Yes	No	No	1.3	5.46	5.84	359	3	78	35.25	57.9	13	34.1	4.11		1.14	2.78	Yes	No	No	No
No	Mal	59				No	No	No	Yes	No	No							No	No	No	No	No	No	No	No		No	No	No	No	No	9.4	18.49	4.28	125	4.64	147	43.57	49	13.2	30.2	1.86		0.15		No	No	No	No
No	Mal	65	170	70	90	No	No	No	No	Yes	No					Ⅰ		No	No	No	No	No	No	No	No		No	No	Yes	No	No	0.58	1.43	9.07	164	4.47	142	43.58	78.4	12.1	29	3.04		0.15	4.85	Yes	No	No	No
No	Mal	65	165	60	80	No	Yes	No	No	No	No					Ⅱ		No	No	Yes	No	No	No	No	No		No	No	Yes	No	No	1.4	9.47	4.84	150	3.75	111	34.23	104.8	13.6	28.6	3.32	1	1.11		No	No	No	No
No	Mal	72	165	54	90	No	No	No	No	Yes	No							No	No	No	No	No	No	No	No		No	No	Yes	No	No	1.47	9.08	2.79	184	4.28	134	42.73	74.2	12.2	22.6	3.77		0.49		Yes	No	No	No
No	Mal	72	165	65	70	No	No	No	No	Yes	No					Ⅲ		No	No	No	No	No	No	No	No		No	No	No	No	No	2.08	25.43	5.31	178	3.91	120	41.54	77.6	13.1	30	4.41		0.35		No	No	No	No
No	Mal	67	154	55	60	No	No	No	No	No	No					Ⅳ		No	No	No	No	Yes	No	No	No		No	No	No	No	No	1.67	568.6	7.94	434	3.64	106	30.46	48.3	11.3	26.9	3.88		3.94		No	No	No	No
No	Mal	47	160	50	20	No	No	No	No	No	No					Ⅳ		No	Yes	No	No	Yes	No	No	No		No	No	Yes	No	No	>100.00	>700.00	19.3	23	1.71	57	40.06	207.4	19.9	43.1	0.74		>5.00		No	No	No	No
No	Mal	67	170	60	80	No	No	No	No	Yes	No					Ⅳ		No	Yes	No	No	No	No	No	No		No	No	Yes	No	No	4.94	2.73	12.4	445	3.2	93	28.36	62	13.3	31.4	4.13		1.3		No	No	No	No
No	Mal	66	169	78	90	No	Yes	No	No	No	Yes					Ⅱ		No	No	No	No	No	No	No	No		No	No	Yes	No	No	13.16	21.89	5.49	251	3.28	71	35.48	110.7	10.8	22.8	3.66		0.4		Yes	No	No	No
No	Mal	63	165	66	70	No	Yes	No	Yes	Yes	No							No	No	No	No	No	No	No	No		No	No	No	No	No															No	No	No	No
No	Mal	46	163	49	90	No	No	No	No	Yes	No					Ⅳ		No	No	No	No	No	No	Yes	No		No	No	No	No	No	<0.50	240.63	5.67	151	4.64	146	46.57	88.4	13.4	32.3	3.4		0.36		No	No	No	No
No	Fem	75	143	40	40	No	No	No	Yes	Yes	Yes					Ⅳ		No	No	No	No	No	No	Yes	No		No	No	Yes	No	No	>100.00	12.27	12.17	397	3.92	112	33.21	55.7	10.1	24.3	4.27		3.69	1.69	No	No	No	No
No	Fem	81			50	No	No	No	No	Yes	No					Ⅳ		No	Yes	No	No	No	No	No	No		No	No	Yes	No	No	2.01		11.78	185	3.53	116	35.61	63.2	9.9	17.2	2.36		5.17		No	No	No	No
No	Mal	63	160	55	80	No	No	No	No	Yes	Yes					Ⅰ		No	No	No	No	Yes	No	No	No		No	No	Yes	No	No	5.97	2.45	3.52	280	2.57	74	33.59	73.7	10.5	19.3	2.7	1.5	1.54	4.74	Yes	No	No	No
No	Mal	59	165	40	70	No	No	No	No	Yes	No					Ⅳ		No	Yes	No	No	No	No	No	No		No	No	Yes	No	No	1.64	10.12	6.9	241	3.91	120	33.28	46	15	32.4	5.24		1.02		No	No	No	No
No	Mal	78				No	No	No	No	Yes	No					Ⅳ		Yes	No	No	No	Yes	No	No	No		No	No	Yes	No	No			4.61	78	3.77	111	41.74	68.6	10.5	22.1	4.13		3.47		No	No	No	No
No	Mal	50	160	51	90	No	No	No	No	Yes	No					Ⅳ		No	Yes	No	No	No	No	No	No		Yes	No	No	No	No	94.31	>700.00	3.51	129	5.23	131	46.5	57.4	12.3	28.3	2.63		2.66		No	No	No	No
No	Mal	43	163	56	80	No	No	No	No	Yes	No					Ⅲ		No	No	No	No	No	No	No	No		Yes	No	Yes	No	No	2.01	>700.00	5.31	169	4.96	154	42.42	54.3	12.4	31.7	2.91		0.4		Yes	No	No	No
No	Fem	74	150	44	70	No	No	No	No	Yes	No					Ⅳ		No	No	No	No	Yes	No	No	No		No	No	No	No	No	>100.00	>700.00	5	225	2.81	93	29.94	46.1	11.3	18.2	3.77		2.37	3.87	No	No	No	No
No	Mal	89	178	76	70	No	No	No	No	Yes	Yes							Yes	No	No	No	Yes	No	No	No		No	No	No	No	No			13.5	281	2.19	56	30.64	81.2	13.8	32.1	4.01		0.81		No	No	No	No
No	Fem	79	143	59	70	No	Yes	No	No	Yes	No					Ⅱ		No	No	No	No	No	No	No	No		No	No	No	No	No	7.78	11.64	5.22	138	4.84	147	42.56	60.8	12.4	23.5	2.97		0.59		No	No	No	No
No	Fem	29	150	53	90	No	No	No	No	Yes	No							No	No	No	No	No	No	No	No		No	No	No	No	No		525.14	9.82	240	4.73	142	45.32	53.9	12.9	33.1	2.44		0.2		No	No	No	No
No	Mal	71	158	58	90	No	No	No	No	No	No					Ⅱ		No	No	No	No	No	No	No	No		Yes	No	No	No	No	1.8	8.58	4.56	266	3.81	89	37.78	70.3	12.6	29.9	2.97		1.12		No	No	No	No
No	Mal	47	166	63	70	No	No	No	No	No	Yes							Yes	No	No	No	Yes	No	No	No		No	No	No	No	No	2.66	23.55	7.16	232	3.22	65	38.63	57.8	14	23.9	1.64	0.9	0.24		No	No	No	No
No	Mal	62	161	54	80	No	No	No	No	Yes	No					Ⅲ		No	No	No	No	No	No	No	No		No	No	Yes	No	No	0.53	<1.20	3.65	284	4.23	127	37.26	57.1	11.5	30.9	3.88		0.2		Yes	No	No	No
No	Mal	59	165	61.5	90	No	No	No	No	Yes	No					Ⅱ		No	No	Yes	No	No	No	No	No		Yes	No	Yes	No	No	<0.50	6.75	4	277	3.73	118	36.57	80.3	11.5	25.6	4.27	1.8	7.61	4.38	No	No	No	No
No	Mal	48	160	67	70	No	No	No	No	Yes	No					Ⅳ		Yes	No	Yes	No	Yes	No	No	No		Yes	No	No	No	No	8.93	9.82	5.98	163	4.41	139	42.8	70.03	12.1	28.1	2.11	3.69	0.64	4	No	No	No	No
No	Mal	60	160	70	70	No	Yes	No	Yes	Yes	No					Ⅳ		No	No	No	No	No	No	No	No		Yes	No	Yes	No	Yes	2.52	34.69	7.56	236	4.82	145	43.93	59.3	10.2	22.9	3.88		3.86	5.51	No	No	No	No
No	Mal	77			70	No	No	Yes	No	No	No							No	No	No	No	No	No	No	No		No	No	No	No	No			28.2	177	4.98	150	44.37	83.2	13.2	27.1	4.56	2.2	0.77	3.7	No	No	No	No
No	Mal	52	159	53	80	No	No	No	No	Yes	No					Ⅲ		No	No	Yes	No	No	No	No	No		Yes	No	Yes	No	No	0.93	<1.20	4.9	320	4.94	139	47.33	78.22	10.1	23.9	1.88	0.6	0.27	5.28	No	No	No	No
No	Mal	66	155	54	90	No	No	No	No	No	No					Ⅱ		No	No	No	No	Yes	No	No	No		No	No	No	No	No	2.07	4.5	6.46	147	4.44	139	46.19	70.8	10.1	24.3	3.15	0.7	0.13	5.85	No	No	No	No
No	Fem	45	155	41	90	No	No	No	No	Yes	No					Ⅳ		No	No	No	No	No	No	Yes	No		Yes	No	No	No	No	<0.50	10.47	4.18	355	3.75	112	41.02	51.9	11.9	25.9	4.71	0.5	1.89		No	No	No	No
No	Fem	41	160	49	60	No	No	No	No	Yes	No					Ⅳ		No	No	No	No	No	No	Yes	No		No	No	Yes	No	No	<0.50	<1.20	10.1	291	3.88	109	33.96	40.8	11.7	24.3	4.56		4.35	2.68	No	No	No	No
No	Mal	71	170	49	70	No	No	No	No	Yes	No							Yes	No	No	No	Yes	No	No	No		No	No	No	No	No	49.1	16.51	2.86	124	4.11	102	36.02	58.72	10.3	30.5	2.97		0.91		No	No	No	No
No	Mal	51	164	63	80	No	No	No	No	Yes	Yes					Ⅲ		No	No	Yes	No	No	No	Yes	No		Yes	No	Yes	No	No	<0.50	7.71	2.58	175	3.67	109	36.38	68.28	12.7	28.5	3.11	1.8	0.81		No	No	No	No
No	Mal	71	165	55	90	No	Yes	No	Yes	No	No					Ⅲ		No	No	No	No	No	No	No	No		No	No	Yes	No	No	5.18	52.89	4.34	131	4.26	124	37.95	52.98	11.7	26.1	2.85		0.13		Yes	No	No	No
No	Fem	58	151	50	90	No	No	No	No	Yes	Yes					Ⅳ		Yes	No	Yes	No	Yes	No	No	No		Yes	No	Yes	No	No	>100.00	376.79	6.03	249	3.69	81	44.49	62.92	11.9	22.8	4.01		0.92	4.81	No	No	No	No
No	Mal	58	166	65	80	No	Yes	No	No	Yes	No							No	No	Yes	No	No	No	No	No		No	No	Yes	No	No	3.9	9.36	4.3	248	4.28	139	49.08	65.3	11.6	26.7	4.11	4.8	0.78	5.42	No	No	No	No
No	Mal	58	163	62	80	No	No	No	No	Yes	No					Ⅲ		No	No	Yes	No	No	No	No	No		Yes	No	No	No	No	<0.50	1.52	5.06	188	3.53	123	46.62	64.1	12.9	29.7	2.63	0.5	1.16		No	No	No	No
No	Mal	62	165	51	80	No	Yes	No	No	Yes	No					Ⅳ		No	No	Yes	No	Yes	No	No	No		Yes	No	Yes	No	No	3.71	<1.20	3.97	222	3.71	102	30.72	46.9	11.2	33.6	4.01		0.68	3.72	No	No	No	No
No	Mal	63	166	55	80	No	No	No	No	Yes	No					Ⅱ		No	No	No	No	No	No	No	No		No	No	Yes	No	No	<0.50	22.23	4.84	164	3.75	112	41.85	77.84	12.2	28.4	2.23		0.11		Yes	No	No	No
No	Mal	45	160	55	70	No	No	No	No	Yes	No					Ⅳ		No	No	No	No	No	No	No	No		Yes	No	Yes	No	No	33.87	17.52	4.28	249	4.13	116	40.2	78.22	10.6	29.2	3.18		0.7		No	No	No	No
No	Fem	46	155	48	90	No	No	No	No	No	No							No	No	No	No	No	No	No	No		No	No	No	No	No	0.91	8.27	4.74	123	4.25	136	48.12	63.7							No	No	No	No
No	Mal	57	162	43	70	No	No	No	No	Yes	No					Ⅳ		No	No	No	No	No	No	No	No		No	No	Yes	No	No	9.4	12.89	3.32	127	3.05	98	33.95	41.89	13.4	31.6	4.13		0.89		No	Yes	No	No
No	Mal	62	151	41	80	No	No	No	No	Yes	No					Ⅲ		No	No	No	No	No	No	No	No		No	No	No	No	No			3.8	157	3.6	118	29.46	63.5	11.9	25.5	1.6		0.62		No	No	No	No
No	Mal	58	184	92	70	No	No	No	Yes	Yes	No					Ⅰ		No	No	No	No	No	No	No	No		Yes	No	Yes	No	No	<0.50	3.52	4.75	115	4.24	127	42.27	134.9	11.6	31.3	3.25		0.38		Yes	No	No	No
No	Mal	70	168	65	90	No	No	No	No	Yes	No					Ⅰ		No	No	No	No	No	No	No	No		Yes	No	Yes	No	No	2.07	3.35	5.66	190	4.5	146	45.16	70.8	10.2	27.2	2.91	2.6	0.29	6.28	Yes	No	No	No
No	Fem	63	152	51	90	No	No	No	No	Yes	No					Ⅱ		No	No	No	No	No	No	No	No		Yes	No	Yes	No	No	2.75	7.37	5.68	155	3.98	119	39.38	59.2	9.4	20.6	2.8		0.64		Yes	No	No	No
No	Mal	60	156	60	90	No	No	No	No	Yes	No							No	No	No	No	No	No	No	No		No	No	Yes	No	No	>100.00		10.89	399	3.54	110	38.65	64.3	13.1	24.4	4.41		1.89	3.02	No	No	No	No
No	Mal	76	153	52	80	No	No	No	No	Yes	No	4	1	1	T4N1M1	Ⅳ	[cT4aN1M1IVb期]	No	No	No	No	Yes	No	No	No		No	No	No	No	No			5.29	188	3.03	81	28.3	58.3	11.7	27.4	2.33	16.1	6.88		No	No	No	No
No	Mal	64	168	63	80	No	No	No	No	Yes	No					Ⅱ		No	No	Yes	No	Yes	No	Yes	No		Yes	No	Yes	No	No	4.73	32.33	3.11	155	3.78	98	36.51	58.5	11	24.3	2.66	1	1.87	3.42	No	No	No	No
No	Mal	70	160	50	90	No	No	No	No	Yes	No					Ⅱ		No	No	No	No	No	No	No	No		Yes	No	Yes	No	No	2.09	18.34	5.23	180	4.26	139	40.99	119.42	10.1	25.6	2.06	1.6	0.49	1.36	Yes	No	No	No
No	Mal	79	176	65	60	Yes	No	No	No	No	Yes					Ⅲ		No	Yes	No	No	Yes	No	No	No		Yes	No	No	No	No	0.94	10.73	4.79	355	2.78	76	27.28	79.2	11.4	29.3	4.01		0.74		No	No	No	No
No	Mal	58	165	73	90	No	No	No	No	Yes	No					Ⅲ		No	No	No	No	No	No	No	No		No	No	Yes	No	No	0.8	11.47	4.36	155	4.98	155	45.42	81	11.6	23.4	2.15	4.5	0.43	3.53	Yes	No	No	No
No	Mal	71	163	67	80	No	No	No	No	Yes	No					Ⅳ		No	No	No	No	No	No	No	No		No	No	Yes	No	No	30.28	>700.00	5.85	225	3.98	131	40.66	92.6	11.1	24.8	2.61		5.66		No	No	No	No
No	Mal	68	162	54	90	No	No	No	No	Yes	No					Ⅳ		No	No	No	No	No	No	No	No		Yes	No	Yes	No	No	1.55	13.39	3.75	144	3.64	138	43.31	83.51	9.6	22.5	3.5		0.64		Yes	No	No	No
No	Mal	60	158	46	80	No	No	No	No	Yes	Yes					Ⅲ		No	No	No	No	Yes	No	No	No		No	No	Yes	No	No	0.93	>700.00	4.66	266	3.28	68	36.88	48.6	11.6	26.3	3.49		0.26	4.07	Yes	No	No	No
No	Mal	52	164	56	80	No	No	No	No	Yes	No					Ⅱ		No	No	No	No	No	No	No	No		Yes	No	Yes	No	No	2.18	23.98	5.41	286	4.68	146	42.41	70.1	10.3	24.2	3.5		0.11		Yes	No	No	No
No	Mal	62	161	47	80	No	No	No	No	Yes	No							No	No	No	No	No	No	No	No		No	No	No	No	No	1.86	12.93	5.96	341	4.44	92	42.35	64.4	10.1	25.5	2.44		0.31		No	No	No	No
No	Mal	61	166	62	80	No	No	No	No	Yes	No					Ⅳ		No	No	No	No	No	No	No	No		Yes	No	Yes	No	No	22.57	167.46	5.22	204	5.29	112	38.82	61.8							No	No	No	No
Yes	Mal	62	161	44	60	No	No	No	No	No	No					Ⅳ		No	No	No	No	No	No	Yes	No		No	No	Yes	No	Yes	3.09	15.71	4.32	217	3.6	121	35.79	68.58	11.6	26.8	4.71		0.53	1.94	No	No	No	No
No	Fem	43	160	70	90	No	No	No	No	Yes	No					Ⅰ		No	No	No	No	No	No	No	No		No	No	Yes	No	No	1.11	8.6	8.34	433	4.19	127	43.97	66.6	9.6	23	2.29		0.13		Yes	No	No	No
No	Mal	70	165	57	80	No	No	No	No	Yes	No					Ⅰ		No	No	No	No	No	No	No	No		Yes	No	Yes	No	No	1.68	16.34	4.14	120	3.98	130	40.07	58.5	12.1	25.7	2.23		0.4		Yes	No	No	No
No	Mal	82	167	64	80	No	Yes	No	Yes	Yes	No							No	No	No	No	No	No	No	No		Yes	No	No	No	No	3.4	18.49	6.23	104	3.72	117	45.62	73.6	15.3	29.7	2.58	1.7	0.54	4.36	Yes	No	No	No
No	Mal	76	166	47	90	No	No	No	No	Yes	Yes	4	1	0	T4N1M0	Ⅲ	[pT4bN1M0IIIb期]	No	Yes	No	No	Yes	No	Yes	No		No	No	Yes	No	Yes	1.99	23.42	6.36	313	4.11	121	42.56	59.3	11.8	29	4.94	1.6	0.43	3.96	Yes	No	No	No
No	Mal	64	155	68	80	No	No	No	No	Yes	No					Ⅲ		No	No	No	No	Yes	No	No	No		Yes	No	Yes	No	No	11.45	13.25	8.3	229	4.69	144	42.08	66.4	12.3	31	4.13		0.49	6.08	No	No	No	No
No	Mal	58	161	65.5	80	No	No	No	No	Yes	No					Ⅱ		No	No	No	No	No	No	No	No		Yes	No	No	No	No	2.51	10.53	4.22	150	4.32	132	39.94	57.4	12.3	28.4	3.4		0.4		No	No	No	No
No	Mal	74	162	58	90	No	Yes	No	No	No	No							No	No	No	No	No	No	No	No		No	No	No	No	No	1.04	10.71	3.82	136	3.99	126	39.25	73.6	11.9	28.8	2.49	<2.50	0.26	5.69	Yes	No	No	No
No	Mal	62	167	51.5	80	No	No	No	No	Yes	No					Ⅱ		No	No	No	No	No	No	No	No		No	No	Yes	No	No			4.8	237	3.69	116	37.08	72.2	12.1	26.1	2.91		0.37		No	No	No	No
No	Mal	52	163	67	90	No	No	No	No	Yes	No							No	No	No	No	No	No	No	No		No	No	Yes	No	No			5.23	170	5.15	166	49.45	59.2	10.3	27	2.13		0.16		Yes	No	No	No
No	Mal	47	160	49.5	80	No	No	No	No	Yes	No					Ⅱ		No	No	No	No	No	No	No	No		Yes	No	No	No	No	1.3	168.09	5.51	205	4.61	138	43.93	77.85	12	35.2	2.2		1.85		No	No	No	No
No	Mal	52	167	60	70	No	No	No	No	Yes	No					Ⅳ		Yes	No	No	No	Yes	No	No	No		Yes	No	Yes	No	No	3.11	6	6.55	198	4.21	137	41.66	84.98	12.1	26.1	2.42	<2.50	3.06	7.02	No	No	No	No
No	Fem	76	149	51.5	90	No	Yes	No	Yes	Yes	No					Ⅲ		No	No	No	No	No	No	No	No		No	No	No	No	No	4.08		4.18	131	3.78	115	42.93	57.05	10.5	26.6	2.08		0.61	3.83	Yes	No	No	No
No	Fem	74	150	41	60	No	No	No	No	Yes	Yes					Ⅳ		No	Yes	No	No	Yes	No	No	No		No	No	Yes	No	No	>100.00	>700.00	4.69	155	1.74	63	32.33	137.8	11.7	37.2	2.11		0.13		No	No	No	No
No	Mal	68	155	57	80	No	No	No	No	Yes	No					Ⅳ		No	No	No	No	No	No	No	No		No	No	No	No	No	3.48	7.65	5.01	127	4.6	155	47.09	67.4	12	26.1	2.17		0.86		No	No	No	No
No	Mal	60	163	50	90	No	No	No	No	Yes	No					Ⅳ		No	No	No	No	Yes	No	No	No		No	No	Yes	No	No	5.9		9.31	228	2.68	85	33	44.6	13.4	29.1	3.75		0.94	4.06	No	No	No	No
No	Mal	61	170	54	80	No	No	No	No	Yes	Yes					Ⅲ		No	No	No	No	No	No	No	No		No	No	Yes	No	No	1.13	6.71	5.13	512	4.33	73	38.8	65.9	11	25.7	4.31	0.8	0.74		Yes	No	No	No
No	Mal	67	178	52	80	No	Yes	No	No	Yes	No					Ⅳ		No	Yes	No	No	No	No	No	No		No	No	No	No	No	>100.00	4.03	7.52	349	4.49	124	36.43	64.5	12.2	32.8	4.31		0.14	4.29	No	No	No	No
No	Mal	69	160	48	80	No	No	No	No	Yes	Yes					Ⅳ		No	No	No	No	No	No	No	No		No	No	Yes	No	No	57.77	16.05	5.38	281	3.8	79	39.92	73.5	12.6	32.2	4.52		0.58		No	No	No	No
No	Fem	73	150	48	70	No	No	No	No	No	No					Ⅱ		No	No	No	No	No	No	No	No		No	No	No	No	No	2.35	2.97	3.29	194	3.99	120	40.7	57.3	11	32.7	2.5		0.64		No	No	No	No
No	Mal	65	164	50.5	90	No	No	No	No	Yes	No					Ⅲ		No	No	No	No	No	No	No	No		No	No	Yes	No	No			5.59	153	3.91	122	40.15	43.37	11.3	35	2.16	0.9	0.13		Yes	No	No	No
No	Fem	68	140	46	70	No	No	No	No	Yes	No					Ⅲ		No	No	No	No	No	No	No	No		Yes	No	No	No	No	9.37	106.14	3.75	241	2.97	101	25.77	65.9	12.6	25.4	3.29		0.75	1.93	No	No	No	No
No	Fem	50	150	47	70	No	No	No	No	Yes	No					Ⅳ		No	No	No	No	Yes	No	No	No		No	No	Yes	No	No	0.59	5.27	4.79	139	3.99	111	47.06	45.17	12.7	24.8	2.38	1	0.14		Yes	No	No	No
No	Mal	68	168	46	70	No	No	No	No	Yes	No					Ⅲ		No	No	No	No	No	No	No	No		No	No	No	No	No	0.99	37.18	8.97	160	5.02	150	47.91	130.5	11.8	26.2	3.37		0.94		No	No	No	No
No	Fem	57	155	38	80	No	No	No	No	Yes	No					Ⅳ		No	No	No	No	Yes	No	No	No		No	No	No	No	No	<0.50	218.52	3.81	209	4	90	42.68	77.12	11.2	24.2	2.82		1.15		No	No	No	No
No	Mal	88			40	No	No	No	No	Yes	No							No	Yes	No	No	Yes	No	No	No		No	No	No	No	No	4.33		2.85	71	3.34	73	21.51	98.9	14.5	37.7	1.46		2.65		No	No	No	No
No	Mal	64	170	54	80	No	No	No	No	Yes	No							No	No	No	No	No	No	No	No		No	No	No	No	No	16.01	639.39	3.86	313	3.74	123	33.97	73.31	12.9	26	2.85		2.48		No	No	No	No
No	Mal	72	168	41.5	60	No	No	No	No	Yes	No					Ⅳ		No	No	No	No	No	No	No	No		No	No	No	No	No	10	134.59	6.38	522	4.16	97	33.99	80.83	11.1	32.8	4.31		1.38		No	No	No	No
No	Mal	72	162	46	70	No	No	No	No	Yes	No							No	No	No	No	No	No	No	No		No	No	Yes	No	No	85.81	14.12	7.35	181	3.84	119	33.2	65.89	12.3	28.3	2.72		0.39		No	No	No	No
No	Mal	46	160	55	80	No	No	No	No	Yes	No					Ⅱ		No	No	No	No	No	No	No	No		No	No	Yes	No	No	39.28	18.81	4.14	208	4.01	98	39.49	94.66	10.7	25	2.19		0.26	4.58	Yes	No	No	No
No	Mal	77	158	53	70	No	Yes	No	No	Yes	No					Ⅳ		No	No	No	No	Yes	Yes	No	No		No	No	Yes	No	No	4.11		4.1	257	3.72	125	39.01	101.9	12.6	26.6	3.65		0.22		Yes	No	No	No
No	Mal	56	163	67	80	No	No	No	No	Yes	No	4	0	0	T4N0M0	Ⅲ	[pT4N0M0ⅢB期]	No	No	Yes	No	No	No	No	No		No	No	No	No	No	2.46	13.57	3.6	131	3.47	108	37.9	59.3	12.9	30.2	3.92	4.3	1.05		No	No	No	No
No	Mal	74	158	60	90	No	No	No	No	Yes	No				T2N0M0	Ⅱ		No	Yes	No	No	No	No	No	No		No	No	Yes	No	No	1.46		10.49	161	5.46	161	44.3	71.5	10.1	27	2.35	1.4	0.22	5.74	No	No	No	No
Yes	Mal	94	162	58	60	No	No	Yes	No	Yes	Yes							Yes	No	No	No	Yes	No	No	No		No	No	No	No	No	<0.50	129.3	13.36	231	2.86	59	23.66	79.1	13.1	29.8	3.13		3.19	3.5	No	No	No	No
No	Mal	65	165	45	80	No	No	No	No	Yes	No					Ⅳ		No	No	No	No	No	No	No	No		No	No	No	No	No	1.85	28.73	6.64	153	3.28	76	37.74	62.1	12.6	34.1	4.75		0.75	1.6	No	No	No	No
No	Mal	63	165	70	70	No	Yes	No	No	No	No					Ⅳ		Yes	Yes	Yes	No	Yes	No	No	No		No	No	No	No	No	<0.50	9.41	4.98	190	3.86	110	40.45	143.1	12.2	26.7	3.2	24.9	0.99	5.37	Yes	No	No	No
No	Mal	70	161	57	60	No	Yes	No	No	Yes	Yes				T3N2M1	Ⅳ		No	Yes	Yes	No	Yes	No	No	No		No	No	Yes	No	No	5.6	13.31	6.88	155	2.53	78	18.4	100	13.9	39.4	1.06	7.9	2.68	2.5	No	No	No	No
No	Fem	62	150	50	80	No	No	No	No	No	No							No	Yes	No	No	No	No	No	No		No	No	Yes	No	No	<0.50	11.07	7.21	259	3.94	110	40.55	46.56	12	25.7	2.2	<2.50	0.4	5.73	Yes	No	No	No
No	Mal	58			20	No	No	No	No	No	No				T4bNxM1	Ⅳ		Yes	No	No	No	Yes	No	No	No		No	No	No	No	No	2.3	>700.00	9.9	124	3.8	92	26.97	226.6	13.4	27	4.52		>5.00		No	No	No	No
No	Mal	59	165	55	90	No	No	No	No	Yes	Yes				PT3N2M0	Ⅲ		No	No	No	No	No	No	No	No		No	No	Yes	No	No			6.58	202	3.93	76	45.65	79	11.8	24.9	2.61		0.3		Yes	No	No	No
No	Mal	58	162	54	80	No	No	No	No	Yes	No				cT4aNxM1	Ⅳ		No	No	No	No	No	No	No	No		Yes	No	Yes	No	No	<0.50	14.09	6.07	216	5.14	153	44.69	60.8	12	21.6	2.66		0.71		No	No	No	No
No	Mal	51	162	50	80	No	No	No	No	Yes	No				pT4aN2M0	Ⅲ		No	No	No	No	No	No	No	No		No	No	Yes	No	No	0.5	19.87	6.18	246	4.78	147	45.74	52.85	12.4	26.9	2.34	0.2	0.11	5.07	Yes	No	No	No
No	Mal	73	155	49.5	90	No	No	No	No	Yes	No				pT3N1M0	Ⅲ		No	No	No	No	No	No	No	No		No	No	Yes	No	No			4.74	187	5.21	151	42.31	85.54	11.6	28.4	3.2		0.29		Yes	No	No	No
No	Mal	52	166	55	70	No	No	No	No	Yes	No					Ⅲ		No	No	No	No	Yes	No	Yes	No		Yes	No	Yes	No	No	3.42	18.59	6.45	225	2.9	79	37.93	88.5	12.4	22.5	2.55	5.2	1.26	0.74	No	No	No	No
No	Mal	57	165	49	80	No	No	No	No	No	No				cT4N2Mx	Ⅳ		No	No	No	No	No	No	No	No		No	No	No	No	No	224.75	2.89	5.51	209	5.04	114	42.72	75.6	11	28.5	5		0.36		No	No	No	No
No	Fem	73			60	No	No	No	No	Yes	Yes							Yes	No	No	No	Yes	No	No	No		No	No	Yes	No	No	<0.50	13.83	8.3	627	2.75	76	33.19	60.2	11.8	23.9	3.37		0.47	3.65	No	No	No	No
No	Mal	70	167	62	80	No	No	No	No	Yes	No							No	No	No	No	No	No	No	No		No	No	Yes	No	No	<0.50	7.12	5.66	94	4.48	133	44.03	64.3	10.3	23.6	2.89		0.72	4.53	Yes	No	No	No
No	Mal	85	160	46	70	No	No	No	No	Yes	No					Ⅱ		No	No	No	No	No	No	No	No		No	No	Yes	No	No			7.83	176	3.86	121	34.81	75.3	12.4	25.9	2.27		1.14		No	No	No	No
No	Mal	61	165	61	90	No	No	No	No	Yes	Yes					Ⅳ		Yes	No	No	No	Yes	No	No	No		No	No	No	No	No	85.88	12.09	9.94	162	2.16	64	29.45	47.55	15.8	26.8	0.79		>5.00		No	No	No	No
No	Fem	57	152	59.5	80	No	No	No	No	Yes	No					Ⅲ		No	No	No	No	No	No	No	No		Yes	No	Yes	No	No	2.59	3.73	6.64	244	4.74	137	38.14	60.4	13.1	28.3	3.46	2.8	0.19	4.2	Yes	No	No	No
No	Mal	51	164	60.5	80	No	No	No	No	Yes	No					Ⅲ		No	No	No	No	No	No	No	No		Yes	No	No	No	No	59.51		7	206	4.18	109	43.12	67.4	11.7	27.3	3.47		6.17		No	No	No	No
No	Mal	60	154	63	80	No	No	No	No	Yes	No					Ⅱ		No	No	No	No	Yes	No	Yes	No		No	No	Yes	No	No	2.59	10.99	3.6	161	4.52	147	38.18	105	11.7	25.2	2.42	4.3	0.13	3.58	Yes	No	No	No
No	Mal	41	160	44	80	No	No	No	No	Yes	Yes					Ⅱ		No	No	No	No	Yes	No	No	No		No	No	Yes	No	No	2	7.07	4.31	253	2.71	76	34.13	55.17	12.2	25.1	1.94	1.1	0.22		Yes	No	No	No
No	Mal	39	175	75	80	No	No	No	No	Yes	No					Ⅰ		No	No	No	No	No	No	No	No		No	No	Yes	No	No	0.59	4.05	8.54	304	5.33	156	43.97	84.6	12.6	26.7	3.37	0.4	0.11	4.25	Yes	No	No	No
No	Fem	46	150	34.5	90	No	No	No	No	No	No							No	No	No	No	No	No	No	No		No	No	Yes	No	No	1.13	19.68	4.92	96	3.34	105	37.77	81.8	10.1	26.9	2.76		0.42	6.54	No	No	No	No
No	Mal	84	167	63	90	No	No	No	No	Yes	No					Ⅲ		No	No	No	No	No	No	No	No		No	No	Yes	No	No			6.91	170	4.26	85	38.57	94	12.4	28.2	3.13		1.09		No	No	No	No
No	Fem	56	164	33	80	No	No	No	No	No	No					Ⅰ		Yes	No	No	No	No	No	No	No		No	No	No	No	No	2.1	9.82	5.51	148	3.75	127	44.15	58.76	12.3	23.1	2.5	1.1	0.29	5.39	No	No	No	No
No	Fem	26	150	50	90	No	No	No	No	Yes	No					Ⅲ		No	No	No	No	No	No	No	No		No	No	No	No	No	1.49	23.46	5.55	274	4.59	114	49.19	56.2	12.1	25.2	2.55		0.25		No	No	No	No
No	Mal	69	165	58.5	90	No	No	No	No	Yes	Yes					Ⅲ		No	No	No	No	No	No	No	No		No	No	Yes	No	No	3.34	10.41	7.61	416	3.77	98	35.97	68.4	12.4	26.8	4.11	1.2	0.8		Yes	No	No	No
No	Mal	77	174	49.5	70	No	No	No	No	No	No							No	Yes	Yes	No	Yes	No	No	No		No	No	Yes	No	No	6.45	18.12	3.16	107	2.97	96	35.18	143.53	13.7	29.2	2.02	4.6	0.43	2.31	No	No	No	No
No	Mal	66	157	42	90	No	No	No	No	Yes	No					Ⅱ		No	No	No	No	No	No	No	No		Yes	No	Yes	No	No			5.87	231	4.22	134	40.65	81.7	12	26.3	2.42		0.64		No	No	No	No
No	Mal	39	175	75	90	No	No	No	No	Yes	No					Ⅳ		No	No	No	No	No	No	No	No		No	No	No	No	No	11.44	321.22	5.4	263	3.37	103	45.26	71.34	12	27.5	4.75		1.5		No	No	No	No
No	Mal	70	167	70	70	No	No	No	No	Yes	No					Ⅱ		No	No	No	No	No	No	No	No		No	No	Yes	No	No	53.04	246.43	6.64	207	4.69	142	45.97	78.58	10.5	23.1	3.23		0.39		Yes	No	No	No
No	Mal	58	155	46	90	No	No	No	No	Yes	No					Ⅳ		No	No	No	No	No	No	No	No		Yes	No	Yes	No	No	75.83	11115	5.91	215	3.83	121	45.21	62.26	12.3	24.5	2.42		1.82		Yes	No	No	No
No	Mal	60	162	44	70	No	No	No	No	Yes	No					Ⅲ		No	No	No	No	No	No	No	Yes		No	No	Yes	No	No	1.88	15.17	3.33	114	3.66	112	31.15	68.18	10.7	33.7	2.19	2.1	2.25	3.53	Yes	No	No	No
No	Mal	59	166	53	80	No	No	No	No	Yes	No					Ⅲ		No	No	No	No	No	No	No	No		Yes	No	Yes	No	No	5.54	67.38	4.48	240	4.65	137	46.91	79.3	13.4	42.8	2.17		2.69		No	No	No	No
No	Mal	77			70	No	No	No	No	No	No					Ⅲ		No	No	No	No	Yes	No	Yes	No		No	No	No	No	No	0.67	4.22	3.14	333	2.15	68	31.18	90	13.7	32.2	3.75		2.84		No	No	No	No
No	Mal	59	170	67.5	80	Yes	Yes	No	No	Yes	No					Ⅰ		No	No	Yes	No	No	No	No	No		Yes	No	Yes	No	No	0.89	12.7	6.5	192	4.96	145	47.89	70.69	13.2	36.1	2.85	0.6	0.41	4.51	No	No	No	No
No	Mal	62	170	45	80	No	No	No	No	No	No							No	No	No	No	No	No	No	No		No	No	Yes	No	No	33.54	39.28	5.55	160	4.36	143	38.59	58.7	11.8	29.3	2.5		1.27		No	No	No	No
No	Fem	77	144	60	70	No	No	No	No	No	Yes							No	No	No	No	Yes	No	No	No		No	No	Yes	No	No	9.57	13.18	7.02	311	2.52	51	34.9	218.1	11	27.4	3.18	2.3	0.3	4.38	No	No	No	No
No	Mal	52	163	38	60	No	No	No	No	No	No					Ⅳ		No	No	No	No	Yes	No	No	No		No	No	No	No	No	2.13	61.11	6.08	193	2.22	74	29.39	57.8	14	39.2	3.75		3.98		No	No	No	No
No	Mal	73	160	45	80	No	Yes	No	Yes	No	No							No	No	No	No	No	No	No	No		No	No	Yes	No	No	2.45	32.98	7.11	141	3.68	121	36.6	37.6	11.5	31.5	2.95		0.76	3.92	No	No	No	No
No	Fem	47	156	36	50	No	No	No	No	No	No					Ⅳ		No	No	No	No	No	No	No	No		No	No	Yes	No	No	7.1	>1200.00	4.74	196	3.12	101	40	42.17	12.7	28.2	2.46		2.08	2.25	No	No	No	No
No	Mal	67	154	48	70	No	No	No	No	Yes	No					Ⅳ		Yes	No	No	No	No	No	No	No		No	No	Yes	No	No	122.6	587.55	13.37	384	3.18	97	27.01	38	12.5	27.2			1.22	2.41	No	No	No	No
No	Mal	40	165	55.5	80	No	No	No	No	Yes	No					Ⅲ		No	Yes	No	No	Yes	No	No	No		Yes	No	Yes	No	No	1.33	11.88	5.56	259	4.2	120	46.41	72.4	11.9	29.3	3.01	<2.50	0.99		Yes	No	No	No
No	Mal	83	160	46	80	No	No	No	No	Yes	Yes							No	No	No	No	No	No	Yes	No		Yes	No	Yes	No	No	44	30.78	5.86	328	3.52	80	36.64	70.3	13.3	27.2	2.38	3.8	1.61		Yes	No	No	No
No	Mal	60	171	59	90	No	No	No	No	Yes	No					Ⅲ		No	No	No	No	No	No	No	No		No	No	Yes	No	No			6	195	4.88	146	48.61	79.8	11.1	24.8	2.22		0.15		Yes	No	No	No
No	Fem	84	150	37	70	No	Yes	No	No	Yes	No							No	No	No	No	No	No	No	No		No	No	Yes	No	No	0.96	75.11	3.84	163	3.3	98	33.55	87	12.1	30.6	2.23		1.09	5.87	Yes	No	No	No
No	Fem	65	152	49	80	No	No	No	Yes	Yes	Yes							No	Yes	No	No	Yes	No	Yes	No		No	No	Yes	No	No	1.67	12.47	4.44	186	4.07	116	46.4	74.5	11.9	23	2.91	1	0.19		Yes	No	No	No
No	Fem	62	150	47	80	No	No	No	No	Yes	No					Ⅳ		No	No	No	No	No	No	No	No		No	No	Yes	No	No	<0.50	11.93	5.4	861	3.84	107	45.08	45.8	12.4	30.1	3.46	0.5	0.23		Yes	No	No	No
No	Mal	65	158	62	90	No	Yes	No	No	Yes	Yes	4a	2	1	T4aN2M1	Ⅲ		No	Yes	No	No	Yes	No	No	No		No	No	Yes	No	No	2.1	6.17	6.76	287	3.78	115	40.3	64.6	11.4	24.8	3.6	<2.50	0.19	3.79	Yes	No	No	No
No	Mal	67	165	66	70	No	Yes	No	No	Yes	No					Ⅳ		No	No	Yes	No	No	No	No	No		Yes	No	Yes	No	No	4.17	40.41	6.63	111	4.33	138	43.83	48.4	12	31	3.01		0.11		No	No	No	No
No	Fem	49	158	54.5	80	No	No	No	No	No	No					Ⅱ		No	No	No	No	Yes	No	No	No		No	No	No	No	No	2.29	15.09	6.08	293	3.54	83	41.24	91.1	12.6	29.9	3.65	0.8	0.32		No	No	No	No
No	Mal	70	160	53	80	No	No	No	No	Yes	Yes							No	No	No	No	Yes	No	No	No		No	No	Yes	No	No	0.95	10.35	9.25	297	4.6	97	47.58	112.2	11.7	31.6	3.2		0.34	5.52	No	No	No	No
No	Fem	33	150	37	60	No	No	No	No	Yes	No					Ⅳ		No	No	No	No	No	No	No	No		No	No	No	No	No	12.62	1432.1	6.38	300	3.09	64	31.22	35	12.6	34.3	3.65		0.94		No	No	No	No
No	Mal	81	169	64	80	No	No	No	Yes	Yes	No							No	No	No	No	Yes	No	No	No		No	No	No	No	No	0.74	5.45	5.02	205	3.47	85	36.33	63.5	12.7	27.9	3.46	8.7	0.38		No	No	No	No
No	Fem	60	160	50	80	No	No	No	No	Yes	No							Yes	No	No	No	No	No	No	No		No	No	No	No	No	1.67	5.22	5.54	254	4.21	126	39.73	50	11	28.9	3.15		1.42	4.86	No	No	No	No
No	Fem	41	160	55	90	No	No	No	No	Yes	No							No	No	No	No	Yes	No	No	No		Yes	No	Yes	No	No	1.81	16.57	7.52	147	4.06	113	40.79	76.77	13.4	26.2	2.65	16.4	4.6		No	No	No	No
No	Mal	64	159	57	90	No	No	No	No	Yes	No							No	No	No	No	No	No	Yes	No		No	No	Yes	No	No	0.89	30.59	4.19	194	4.18	133	52.15	95.73	11.7	25.9	2.27		0.22	4.04	Yes	No	No	No
No	Mal	65	162	64	80	No	No	No	No	Yes	No					Ⅱ		No	No	No	No	No	No	No	No		No	No	No	No	No	4.89	3.68	5.43	124	5.2	158	49.04	72.5	11.9	33.1	2.66		0.36	5.13	No	No	No	No
No	Fem	69	155	50	80	No	No	No	No	Yes	No					Ⅰ		No	No	No	No	No	No	Yes	No		No	No	Yes	No	No	2.42	3.41	3.63	197	4.45	115	43.75	67.51	11.5	33.9	2.6	3.9	0.26	6.67	Yes	No	No	No
No	Mal	61	165	44	50	No	No	No	No	Yes	No					Ⅳ		No	No	No	No	No	No	No	No		No	No	No	No	No	10.04	40.75	9.15	334	5.12	146	38.28	56.9	10.6	31.4	2.42		0.27		No	No	No	No
No	Mal	58	165	51	80	No	No	No	No	Yes	No					Ⅲ		No	Yes	Yes	No	No	No	No	No		No	No	Yes	No	No	1.08	11.1	3.14	166	4	123	41.28	61.01	11.9	28.8	2.46	5.5	0.22		Yes	No	No	No
No	Fem	50	153	52	80	No	No	No	No	Yes	No					Ⅳ		No	No	Yes	No	Yes	No	Yes	No		Yes	No	Yes	No	No	1.24	34.99	4.68	299	3.91	96	45.6	50.04	11.8	28.5	3.46	3	3.84	0.89	No	No	No	No
No	Mal	55	158	62	90	No	No	No	Yes	Yes	No					Ⅲ		No	No	No	No	No	No	No	No		No	No	Yes	No	No	1.02	9.1	5.28	142	4.47	132	47.38	113.76	10.7	29.6	2.6	1.1	0.14	6.11	Yes	No	No	No
No	Mal	69	147	52	80	No	Yes	No	No	Yes	No					Ⅱ		Yes	No	No	No	No	No	No	No		No	No	Yes	No	No	<0.50	9.66	5.48	155	4.4	151	44.33	85.1	11.8	28.8	1.72	1.2	4.3	4.01	Yes	No	No	No
No	Fem	51	160	43	80	No	No	No	No	Yes	No					Ⅲ		No	No	No	No	No	No	No	No		Yes	No	Yes	No	No	9.92	382.2	3.84	169	3.61	104	41.42	45.96	11.9	26.7	1.7	7.5	2.06		No	No	No	No
No	Fem	72	142	39	80	No	No	No	No	Yes	No					Ⅳ		No	No	No	No	No	No	No	No		Yes	No	No	No	No	4.98	304.7	5.96	241	3.86	121	37.32	39.5	12.7	26.7	3.23		1.03		No	No	No	No
No	Mal	58	152	48	80	No	No	No	No	Yes	No					Ⅲ		No	No	No	No	No	No	No	No		No	No	Yes	No	No	<0.50	7.41	7.81	249	5.08	156	45.38	80.1	11.2	25.3	2.82		0.07		Yes	No	No	No
No	Mal	66	154	48	70	No	Yes	No	No	Yes	No					Ⅱ		No	No	No	No	No	No	No	No		Yes	No	Yes	No	No	<0.50	7.01	6.51	415	4.12	105	39.14	69.9	13.1	33.4	3.86		1.01	4.6	Yes	No	No	No
No	Mal	60	171	74	80	No	No	No	No	Yes	No							Yes	No	No	No	No	No	No	No		Yes	No	No	No	No	4.65	86	6.15	198	4.32	131	40.52	57.33	12.7	30.7	2.84	7.4	0.17	1.94	No	No	No	No
No	Mal	60	174	56	80	No	No	No	No	Yes	No					Ⅳ		No	No	Yes	No	Yes	No	No	No		No	No	Yes	No	No	2.93	180.98	8.45	260	3.3	72	43.25	60.1	9.6	29.3	2.54	2.1	0.82		No	No	No	No
No	Fem	64	140	40	80	No	No	No	No	Yes	No					Ⅲ		No	No	No	No	No	No	No	No		No	No	Yes	No	No	2.32	5.34	4.62	175	4.85	110	45.74	65.36	10.9	25.3	3.51		0.44	3.58	Yes	No	No	No
No	Mal	51	166	60	90	No	No	No	No	Yes	No					Ⅲ		No	No	No	No	No	No	No	No		No	No	No	No	No	<0.50	7.92	6.38	326	4.16	82	30.29	79	13.2	31.6	3.41		0.08		No	No	No	No
No	Mal	64	164	46	90	No	No	No	No	Yes	No					Ⅲ		No	No	No	No	No	No	No	No		No	No	Yes	No	No			7.94	188	4	151	41.53	53.67	11.8	29.5	2.68		9.8	5.18	Yes	No	No	No
No	Fem	73	1.56	50	80	No	No	No	No	No	No					Ⅱ		No	No	No	No	No	No	No	No		Yes	No	Yes	No	No	0.78	180.49	5.23	191	2.96	87	33.08	65.2	11.3	29.6	4.06		0.6		Yes	No	No	No
No	Mal	61	160	52	70	No	No	No	No	Yes	No					Ⅲ		No	No	Yes	No	No	No	No	No		Yes	No	Yes	No	No	<0.50	7.45	4.51	205	4.07	116	37.52	36.7	12.1	34.3	3.41		0.59		Yes	No	No	No
No	Mal	56	169	64	80	No	No	No	No	No	No							No	No	No	No	No	No	No	No		No	No	No	No	No	<0.50	13.76	5.88	259	4.26	128	35.46	74.43	12.1	27.9	3.35		0.08		No	No	No	No
No	Mal	61			50	No	Yes	No	No	Yes	No					Ⅳ		No	No	No	No	No	No	No	No		No	No	Yes	No	No	18.62	466.23	4.42	261	4.04	127	35.73	30.32	13.9	26.7	3.03		2.27		No	No	No	No
No	Mal	66	170	40	70	No	No	No	No	No	Yes					Ⅱ		No	No	No	No	Yes	No	No	No		No	No	Yes	No	No	6.48	28.19	7.19	238	3.11	98	23.58	42.9	15.8	45.4	0.61		1.51		No	No	No	No
No	Mal	58	168	55	60	No	No	No	No	Yes	Yes					Ⅲ		No	No	Yes	No	Yes	No	Yes	No		Yes	No	Yes	No	No	0.78	4.66	3.94	324	2.15	51	32.7	81.3	11.2	25.4	3.71	9.9	1.75	4.26	Yes	No	No	No
No	Mal	63	168	70	80	No	No	No	No	No	No					Ⅱ		No	No	No	No	No	No	No	No		No	No	Yes	No	No	3.05	<1.20	10.28	192	4.73	157	47.38	86.2	13.7	85.5	2.41	7.2	0.11	4.56	Yes	No	No	No
No	Mal	63	170	48.5	90	No	No	No	No	Yes	No	4	1	1	T4N1M1	Ⅳ	[cT4bN1M1IV期]	No	Yes	Yes	No	Yes	No	No	No		Yes	No	No	No	No	1.01	11.22	6.41	264	4.33	127	30.76	47	9.6	28.8	4.4	3.2	0.83	3.82	No	No	No	No
No	Fem	52	145	47	90	No	No	No	No	No	Yes					Ⅳ		Yes	No	No	No	No	No	Yes	No		Yes	No	Yes	No	No	1.57	20.41	3.58	130	4.12	129	44.95	54.29	12.5	28.9	2.28		0.62		Yes	No	No	No
No	Mal	59	154	47	70	No	No	No	No	No	No							No	No	No	No	Yes	No	No	No		No	No	No	No	No	282.8		6.14	253	3.42	71	35.81	79	14.3	28.6	2.72		>5.00		No	No	No	No
No	Fem	56	155	39	90	No	No	No	No	No	No					Ⅰ		Yes	No	No	No	No	No	No	No		No	No	Yes	No	No	<0.50	<1.20	2.49	227	3.51	101	43.47	53.4	13	28.7	2.41	0.7	0.11	4.99	No	No	No	No
No	Mal	60	165	54	70	No	No	Yes	No	Yes	Yes					Ⅲ		No	No	No	No	Yes	No	No	No		Yes	No	Yes	No	No	4.1	8.57	5.69	508	4.14	92	42.79	60	12.4	28.1	3.08	25.8	4.67	4.31	Yes	No	No	No
No	Mal	77	147	40	60	No	No	No	No	Yes	No					Ⅲ		No	No	No	No	Yes	No	No	No		No	No	No	No	No	1.02	6.28	6.31	353	2.79	61	26.19	80.11	10.2	32.5	3.18		1.8		Yes	No	No	No
No	Mal	78	160	74	70	No	Yes	No	No	Yes	Yes					Ⅱ		Yes	No	No	No	No	No	No	No		Yes	No	Yes	No	No	1.16	11.88	7.4	185	4.92	146	31.78	114.4	13.1	30.5	3.35	2	0.39	2.39	Yes	No	No	No
No	Fem	58	158	58	80	No	No	No	No	No	Yes					Ⅲ		No	No	No	No	No	No	No	No		Yes	No	Yes	No	No	0.98	13.78	8.14	382	4.57	141	46.63	42.94	10.9	26	5.82		0.73		Yes	No	No	No
No	Mal	57	165	55	80	No	No	No	No	Yes	No					Ⅲ		No	No	No	No	No	No	No	No		No	No	Yes	No	No	24.19	2.16	4.4	90	4	133	40.36	75.12	10.2	30.4	2.11	2	0.33	3.63	Yes	No	No	No
No	Fem	72	148	63	90	No	No	No	No	Yes	Yes							No	No	No	No	No	No	No	No		No	No	Yes	No	No			5.12	158	4.32	130	42.86	75.02	9.8	39	2.33		0.3	6.03	Yes	No	No	No
No	Mal	79	156	55	80	No	No	No	No	Yes	No					Ⅳ		No	No	No	No	No	No	No	No		Yes	No	No	No	No	3.08	103.65	4.84	215	4.26	108	34.52	70	10	30.5	2.97	4.1	0.29		No	No	No	No
No	Mal	49	165	67	80	No	No	No	No	Yes	No							No	No	No	No	No	No	No	No		Yes	No	No	No	No	3.32	145.44	8.09	286	5.33	157	44.15	49.78	12.1	29.2	3.29		0.26		No	No	No	No
No	Mal	65	160	52	60	No	No	No	No	Yes	No							No	No	No	No	No	No	No	No		No	No	No	No	No	8.1	>700.00	3.82	104	3.46	107	31.28	74	12.4	29.7	3.41		4.65		No	No	No	No
No	Mal	56	168	65	90	No	No	No	Yes	Yes	Yes	4	3	0	T4N3M0	Ⅲ	[pT4bN3bM0ⅢC期]	Yes	No	Yes	No	Yes	No	No	No		No	No	Yes	No	No	0.98	3.84	6.7	173	4.25	119	42.2	55.8	11.1	27.2	3.49	0.2	0.14	4.82	Yes	No	No	No
No	Mal	62	166	57	80	No	No	No	No	Yes	No							No	No	No	No	No	No	No	No		No	No	No	No	No	<0.50	3.48	5.21	237	3.83	119	45.39	55.1	9.5	25.7	2.82		0.45		No	No	No	No
No	Mal	74	168	60	80	No	No	No	Yes	Yes	No	4	X	1	T4NXM1	Ⅳ		Yes	No	No	No	No	No	No	No		No	No	No	No	No	11.03	>700.00	5.94	166	4.51	136	42.4	74.4	13.7	33.2	4.38	2.2	0.94	5.45	Yes	No	No	No
No	Fem	46	150	57	70	No	No	No	No	Yes	Yes					Ⅳ		No	No	No	No	Yes	No	No	No		No	No	No	No	No	10.65	264.18	2.72	185	3.51	70	36.73	52.05	13.7	27.6	3.41		1.53		No	No	No	No
No	Mal	53	168	69	90	No	No	No	No	Yes	No							No	No	No	No	No	No	No	No		No	No	No	No	No	>1000.00		5.6	225	4.54	138	37.88	71.1	10.1	35.8	2	10.5	0.22	1.62	Yes	No	No	No
No	Mal	27	173	50		No	No	No	No	Yes	No							No	No	No	No	No	No	No	No		No	No	No	No	No	<0.50	2.3	4.75	6	4.1	112	39.97	121.1	14.5	28.5	2.15		3.3		No	No	No	No
No	Mal	42	170	57	70	No	No	No	No	Yes	No					Ⅳ		Yes	No	No	No	Yes	No	No	No		Yes	No	No	No	No	1.03	14.51	7.33	338	3.73	116	39.79	66.28	10.8	35.8	4.64	5.3	1.18		No	No	No	No
No	Fem	53	160	55	80	No	No	No	No	Yes	No					Ⅲ		No	No	No	No	No	No	No	No		Yes	No	Yes	No	No	1.17	268.84	3.96	266	3.97	116	35.32	52.06	9.7	28.1	3.29		0.76		Yes	No	No	No
No	Mal	64	160	52	70	No	No	No	No	Yes	Yes					Ⅱ		No	Yes	No	No	No	No	No	No		Yes	No	Yes	No	No	1.46	37.1	6.08	147	4.67	136	48.66	75.2	13.7	36.2	2.2		0.76		Yes	No	No	No
No	Fem	49	153	45	60	No	No	No	No	Yes	No					Ⅳ		Yes	No	No	No	Yes	No	No	No		No	No	No	No	Yes	>100.00	179.62	6.54	212	4.51	93	33.76	42.6	11.1	29	3.8		3.1	0.53	No	No	No	No
No	Mal	63	147	48	80	No	No	No	No	Yes	No							No	No	No	No	No	No	No	No		No	No	No	No	No	1.7	3.87	4.04	233	4.14	109	43.62	61.8	9.8	34.7	2.2		0.4	4.41	No	No	No	No
No	Mal	40	168	59	70	No	No	No	No	Yes	No					Ⅳ		No	No	No	No	No	No	No	No		No	No	No	No	No															No	No	No	No
No	Fem	71	148	55	80	No	No	No	Yes	Yes	No					Ⅳ		No	No	No	No	No	No	No	No		Yes	No	No	No	No	10.76	56.86	7.29	368	3.72	122	39.2	38.3	9.6	25.9	4.24	2	0.2	4.88	No	No	No	No
No	Fem	45	154	52	80	No	No	No	No	Yes	No					Ⅳ		Yes	Yes	Yes	No	No	No	Yes	No		Yes	No	Yes	No	No	2.13	61.05	4.42	250	4.36	132	44.91	56.9	10.1	32.1	3.63	1.3	0.35	0.51	No	No	No	No
No	Mal	73	155	45	70	No	No	No	No	Yes	No							No	No	No	No	No	Yes	No	No		No	No	No	No	No	0.78	3.35	5.17	191	3.87	125	46.23	60.3	13.9	27.8	2.5	2.8	1.22	5.75	No	No	No	No
No	Mal	63	170	57	70	No	No	No	No	Yes	No					Ⅳ		No	No	No	No	No	No	No	No		Yes	No	Yes	No	No	2.02	5.72	4.53	155	3.4	124	35.47	95.89	10.7	43.2	3.42	2.4	0.29		Yes	No	No	No
No	Mal	78			50	No	Yes	No	Yes	Yes	Yes							No	No	No	No	Yes	No	No	No		No	No	No	No	No	5.5		8.32	239	3.58	63	33.95	57.8	12.4	29.4	3.61		0.62		No	No	No	No
No	Mal	36	163	45	60	No	No	No	No	No	No					Ⅳ		No	No	No	No	No	No	No	No		No	No	No	No	No	1.32	<1.20	12.87	461	3.28	97	30.53	118.69	11.4	31.4	4.24		2.05		No	No	No	No
No	Mal	50	164	56	70	No	No	No	No	No	Yes							Yes	No	No	No	Yes	No	No	No		No	No	Yes	No	No	<0.50	4.34	7.89	542	2.79	64	40.57	59.64	14.3	31.4	3.47		0.43		Yes	No	No	No
No	Fem	43	147	58	80	No	No	No	No	Yes	Yes							No	No	No	No	Yes	No	No	No		Yes	No	Yes	No	No	0.58	10.06	3.73	233	3.16	69	35.91	45.6	10.1	31.8	3.29		0.74		No	No	No	No
No	Fem	72	140	33	70	No	No	No	No	Yes	Yes					Ⅳ		No	No	No	No	No	No	No	No		No	No	No	No	No	13.23	2049	7.61	180	1.92	64	32.31	35	13	32.6	1.84		3.3		No	No	No	No
No	Fem	76	144	45.5	80	No	Yes	No	No	Yes	Yes					Ⅳ		No	No	No	No	Yes	No	No	No		No	No	Yes	No	No			6.21	331	2.94	63	43.92	58.6	11.5	33.6	3.91		2.64	4.09	No	No	No	No
No	Mal	62	160	51	80	No	No	No	No	Yes	No					Ⅳ		No	No	No	No	No	No	No	No		No	No	No	No	Yes	0.55	3.77	10.61	277	5	156	49.89	74	13.6	27.9	3.29	0.8	0.16	2.42	Yes	No	No	No
No	Fem	83	146	32.5	30	No	Yes	No	No	No	Yes							No	Yes	No	No	Yes	No	No	No		No	No	No	No	No	0.57	14.56	2.02	58	2.09	76	34.88	71.9	14.3	32.8	3.13	4.5	1.14	4.27	No	No	No	No
No	Mal	75	165	59	70	No	No	No	No	Yes	No	3	3	1b	T3N3M1b	Ⅳ		No	No	No	No	No	No	No	No		No	No	No	No	No	1		3.76	328	3.82	117	31.4	57.5	12.4	27.9	6.48	4.9	2.4	4.11	Yes	No	No	No
No	Fem	80			70	No	Yes	No	No	No	Yes							Yes	No	No	No	Yes	No	No	No		No	No	No	No	No	0.67	1.71	9.1	182	1.44	38	34.11	75.5	14	24.5	2.32		0.93	0.33	Yes	No	No	No
No	Mal	82	170	60	80	No	Yes	No	No	Yes	No					Ⅱ		No	No	No	No	No	No	No	No		No	No	No	No	No	2.28	25.53	5.79	150	3.34	114	35.94	64.07	13.1	29.2	2.41		9.48		No	No	No	No
No	Mal	49	158	75	90	No	No	No	No	No	No							No	No	No	No	No	No	No	No		No	No	No	No	No	<0.50	5.87	5.14	250	4.84	155	47.8	75.04	9.3	24.7	2.87		0.19		No	No	No	No
No	Mal	59	167	66	80	No	No	No	No	No	Yes					Ⅳ		No	No	No	No	No	No	No	No		No	No	No	No	No	<0.50	11.14													No	No	No	No
No	Mal	56	160	60	90	No	No	No	No	Yes	Yes					Ⅲ		No	No	Yes	No	No	No	Yes	No		No	No	Yes	No	No	2.27	2.64	6.04	225	4.46	145	34.97	80.23	9.6	26.5	3.56	2.2	0.39	4.99	Yes	No	No	No
No	Mal	61	163	51	40	No	No	No	No	Yes	No					Ⅲ		No	No	No	No	Yes	No	No	No		No	No	No	No	No	1.23	<1.20	4.8	735	3.21	87	26.89	41.5	13.5	37.6	2.47		3.01		No	No	No	No
No	Fem	49	160	59	90	No	No	No	No	No	No							No	No	No	No	No	No	No	No		No	No	No	No	No	1.76	12.01	4.8	132	3.98	119	41.15	50.1	12.6	32.1	2.63		0.81		No	No	No	No
No	Fem	63	158	57	80	No	No	No	No	Yes	No					Ⅳ		No	No	No	No	No	No	No	No		No	No	Yes	No	No	14.21	33.96	6.54	292	5.05	137	42.76	51.3	13.9	26.8	2.98	1.7	0.52		Yes	No	No	No
No	Mal	50	164	56	90	No	No	No	No	Yes	No					Ⅲ		No	No	No	No	No	No	No	No		No	No	No	No	No	1.17	3.54	3.63	206	3.22	72	34.84	97	11	31.3	4.24		0.54		No	No	No	No
No	Mal	49	161	51	80	No	No	No	No	Yes	No					Ⅰ		No	No	No	No	No	No	No	No		No	No	No	No	No	1.68	8.19	4.64	175	4.64	132	42.21	69.02	10.8	30.3	1.49	1	0.27		Yes	No	No	No
No	Fem	76	160	45	70	No	No	No	No	Yes	No					Ⅲ		No	No	No	No	Yes	No	No	No		No	No	No	No	No	2.06	4.15	6.19	242	3.57	93	32.07	51.81	10.5	28.1	3.42	1.3	0.32		Yes	No	No	No
No	Fem	61	144	49	90	No	No	No	No	Yes	No							No	No	Yes	No	Yes	No	No	No		No	No	No	No	No	0.74	3.18	7.57	321	4.27	112	32.45	67.15	10.8	33.5	7.81	7.6	2.1	4.45	Yes	No	No	No
No	Fem	50	154	77	70	No	No	No	No	Yes	No					Ⅲ		No	No	No	No	No	No	No	No		Yes	No	No	No	No	8.51	13844	10.39	319	4.75	141	43.77	68.4	10.6	30.2	4.37	10.7	2.65	5.56	No	No	No	No
No	Mal	59	155	55	70	No	No	No	No	No	Yes					Ⅱ		No	No	No	No	Yes	No	No	No		No	No	No	No	No	2.85	13.26	2.2	19	2.15	74	41.43	56.5	13.7	35.3	2.93	4.8	1.59		No	No	No	No
No	Fem	48	151	53	90	No	No	No	No	Yes	Yes					Ⅲ		No	No	Yes	No	Yes	No	No	No		No	No	Yes	No	No	1.4	77.83	3.75	304	3.46	69	37.29	58.8	12.6	35.3	2.66	2.7	0.71	3.61	Yes	No	No	No
No	Mal	58	160	62	80	No	No	No	No	Yes	Yes					Ⅱ		No	No	No	No	Yes	No	No	No		Yes	No	Yes	No	No	<0.50	13.69	4.75	226	3.13	84	40.47	66.9	11.9	30	3.82	2.2	0.7	3.07	Yes	No	No	No
No	Fem	45	157	53	70	No	No	No	No	Yes	No					Ⅳ		No	No	No	No	Yes	No	No	No		Yes	No	No	No	No	<0.50	16.66	5.4	434	3.54	71	39.08	45.7	13	28.8	3.54	7.6	2.52		Yes	No	No	No
No	Fem	64	163	67	80	No	No	No	Yes	Yes	No					Ⅳ		No	No	No	No	No	No	No	No		Yes	No	Yes	No	No	7.01	13.9	6.68	163	3.73	102	35.65	55.96	10.6	27.3	3.42	3.9	0.83		Yes	No	No	No
No	Mal	58	173	60	100	No	No	No	No	Yes	No					Ⅲ		No	No	No	No	No	No	No	No		No	No	Yes	No	No	1.5	6.96	5.6	228	5.15	157	48.1	52.4	10.4	28.7	2.97	0.8	0.1	4.65	Yes	No	No	No
No	Fem	63	164	75	60	No	No	No	No	Yes	No					Ⅳ		No	No	No	No	No	No	No	No		Yes	No	Yes	No	No	217.5	18071	7.3	207	4.83	132	36.07	37.1	13.1	33.6	4.67	10.6	4.49	1.94	No	No	No	No
No	Fem	42	160	40	70	No	No	No	No	Yes	No							No	No	No	No	No	No	No	No		No	No	No	No	No	0.97	17.3	2.96	381	3.85	72	37.63	39.54	10.5	32	2.97	1.9	0.56		No	No	No	No
No	Mal	71	165	47	50	No	No	No	No	Yes	No					Ⅲ		No	No	No	No	Yes	No	No	No		No	No	No	No	No	18.71	>1000.00	3.7	281	3.5	109	29.65	64	12	35.1	3.56	2.6	0.72		No	No	No	No
No	Mal	57	168	55	90	No	No	No	No	No	No							No	No	No	No	No	No	No	No		No	No	Yes	No	No	1.91	12.45	4.34	127	4.07	129	48.39	72.3	12.2	31.1	2.16	1.1	0.24	5.88	Yes	No	No	No
No	Mal	66	155	42	50	No	No	No	No	Yes	Yes					Ⅳ		No	No	No	No	Yes	No	No	No		No	No	No	No	No	2.43	11.76	6.26	246	2.98	64	37.3	45.4	10.7	28.5	2.47	2.8	0.79		No	No	No	No
No	Fem	56	148	53	80	No	No	No	Yes	Yes	No					Ⅳ		No	Yes	No	No	No	No	No	No		No	No	No	No	No	1.3	13.39	4.26	179	3.43	84	32.79	26.9	11.7	35	6.54	10.6	3.98		No	No	No	No
No	Mal	59	170	70	80	No	Yes	No	No	Yes	No					Ⅲ		No	No	Yes	No	No	No	No	No		Yes	No	No	No	No	614.7	11.24	6.99	233	4.98	149	43.58	68.3	10.7	31.1	5	2.5	0.73		No	No	No	No
No	Fem	52	148	49.5	80	No	No	No	No	Yes	No					Ⅲ		No	No	No	No	No	No	Yes	Yes		Yes	No	Yes	No	No	1.33	13.06	4.29	250	4.56	134	46.1	37.8	10.7	39.7	3.07	1.7	0.47		Yes	No	No	No
No	Fem	60	150	50	80	No	No	No	No	Yes	No					Ⅳ		No	No	No	No	No	No	No	No		No	No	Yes	No	No	1.66	8.94	6.63	171	4.36	133	48.4	83.25	9.1	25.6	2.11	6.5	2.17	6.75	Yes	No	No	No
No	Mal	66	165	64	70	No	Yes	No	Yes	Yes	No					Ⅳ		No	No	No	No	No	No	No	No		No	No	No	No	No	16.81	>1000.00	4.47	107	3.71	128	40.6	64.1	9.6	32.7	2.87	1.8	0.4		No	No	No	No
Yes	Mal	68	157	52	80	No	No	No	No	Yes	Yes					Ⅲ		No	No	No	No	Yes	No	No	No		Yes	No	Yes	No	No	1.01	5.36	3.74	257	3.94	114	37.2	52.46	10	27.5	2.62	4	1.28	3.99	Yes	No	No	No
No	Mal	59	160	57	80	No	Yes	No	No	Yes	No					Ⅳ		No	No	Yes	No	No	No	No	No		Yes	No	Yes	No	No	1.7	13.7	6	228	4.37	137	42.11	82	11.4	31.4	3.82	2.7	1.04	6.01	No	No	No	No
No	Fem	37	158	50	80	No	No	No	No	No	No					Ⅳ		No	No	No	No	No	No	Yes	No		Yes	No	Yes	No	No	7.36	86.19	4.22	179	4.05	118	46.5	38	11.5	29.8	3.09	1.9	0.58	2.38	No	No	No	No
No	Mal	45	156	52	90	No	No	No	No	Yes	Yes					Ⅱ		No	No	No	No	No	No	No	No		No	No	Yes	No	No	1.19	3.11	6.49	145	4.97	153	47.74	97.1	9.6	31.5	2.51	2.4	0.66		Yes	No	No	No
No	Fem	62	155	75	80	No	Yes	No	No	Yes	Yes					Ⅳ		No	No	No	No	No	No	No	No		Yes	No	Yes	No	No	856.3	>70000.00	6.75	343	3.88	78	45.25	52.1	10.4	25.5	2.58	13.9	1.7	5.57	Yes	No	No	No
No	Fem	49	162	50	90	No	No	No	No	No	No							No	No	No	No	No	No	No	No		No	No	No	No	No	<0.50	38.14	7.93	376	5.9	106	42.1	54.2	11.9	30.7	3.68	0.5	0.07	5.01	Yes	No	No	No
No	Fem	66	153	51	80	No	No	No	No	Yes	No							No	No	No	No	No	No	No	No		Yes	No	No	No	No	1.22	14.31	4.1	210	3.85	110	42.79	78.97	9.6	29.4	2.58	2.1	0.63		Yes	No	No	No
No	Mal	74	170	61	80	No	Yes	No	No	No	No					Ⅲ		No	No	No	No	No	No	No	No		Yes	No	No	No	No	5.69	26.11	15.09	329	3.74	110	44.03	80.7	10.9	26.3	6.17	3.3	0.76		No	No	No	No
Yes	Mal	72	165	65	90	No	No	No	No	Yes	Yes					Ⅲ		No	Yes	No	No	Yes	No	No	No		No	No	Yes	No	No	3.6	21.86	16.65	267	4.09	129	37.13	85.55	12.3	28.2	3.93	9.7	3.63	4.72	Yes	No	No	No
No	Mal	82	162	48	80	No	No	No	No	Yes	No					Ⅳ		No	No	No	No	No	No	No	No		No	No	No	No	No		81.74	6.43	310	3.99	118	35.81	74.3	11.5	32.4	3.61	9.7	2.94		No	No	No	No
No	Mal	70	167	77	90	No	Yes	No	Yes	Yes	Yes	1	0	0	T1N0M0	Ⅰ		No	Yes	No	No	No	No	No	No		No	No	Yes	No	No	1.05	24.08	4.12	170	4.11	129	48.12	77	11.7	26.1	2.6	0.7	0.16	4.05	Yes	No	No	No
No	Mal	55	165	60	70	No	No	No	No	No	No					Ⅲ		No	No	No	No	No	No	No	No		No	No	No	No	No															No	No	No	No
No	Mal	64	161	58	70	No	Yes	No	No	No	No							No	No	No	No	No	No	No	No		No	No	No	No	No	4.21	20.72	3.48	180	4.7	136	44.38	90.1	11.8	31.1	2.24	2.3	0.16		No	No	No	No
No	Fem	64	160	48	70	No	No	No	No	Yes	No					Ⅳ		No	Yes	No	No	Yes	No	No	No		No	No	No	No	No	21.86	436.07	9.11	143	3.64	110	36.16	77	12.6	28.3	2.33	68.6	>5.00	2.17	Yes	No	No	No
No	Mal	64	152	55	60	No	No	No	No	Yes	No					Ⅳ		No	No	No	No	No	No	No	No		No	No	No	No	No	2.59	17.96	6.24	162	4.59	145	44.86	59.4	12.7	27.1	3.09	0.7	0.3		No	No	No	No
No	Mal	77	163	61	80	No	Yes	No	No	Yes	Yes					Ⅱ		Yes	Yes	Yes	No	Yes	No	Yes	No		No	No	Yes	No	No	2.03	12.27	10.4	128	3.56	107	34.07	60.3	15.4	41.1	3.51	14.9	5.51	1.93	Yes	No	No	No
No	Mal	52	160	60	80	No	No	No	No	Yes	No					Ⅱ		No	No	No	No	Yes	No	Yes	No		No	No	Yes	No	No	0.98	7.32	5.44	195	4.22	148	46.46	77.52	10.3	29.8	2.5	0.5	0.01	5.99	Yes	No	No	No
No	Mal	53	169	47	70	No	No	No	No	Yes	No					Ⅳ		No	No	No	No	No	No	No	No		No	No	No	No	No	19.57	1922.2	7.32	236	4.22	136	43.2	55	10.8	37.7	3.91	1.5	0.32	5.52	No	No	No	No
No	Mal	77	167	72	80	No	Yes	No	No	No	Yes				cT4aN0M0	Ⅱ		No	No	No	No	No	No	No	No		No	No	No	No	No	2.11	25.49	6.21	179	4.55	144	45.6	73.3	12.3	32.4	2.52	0.5	0.21		Yes	No	No	No
No	Mal	49	165	59.5	80	No	No	No	No	Yes	No				pT4aN3M0	Ⅲ		No	No	No	No	No	No	No	No		Yes	No	Yes	No	No	1.59	10.22	7.78	209	4.21	126	40.32	82.28	11.6	39.3	2.87	1.4	0.29		Yes	No	No	No
No	Mal	70	157	65	90	No	No	No	No	Yes	Yes				PT4aN0M0	Ⅲ		No	Yes	No	No	No	No	No	No		No	No	Yes	No	No	3.97		5.03	193	5.04	164	42.92	90.21	10.4	29.4	2.47	1	0.22	5.86	Yes	No	No	No
No	Mal	64	167	59	90	No	No	No	No	Yes	No				pTxN1M1	Ⅳ		No	No	No	No	No	No	Yes	No		No	No	No	No	No	1.23	148.25	8.39	196	4.01	115	41.65	71.3	9.9	28.1	2.29	6.9	2.29		Yes	No	No	No
No	Mal	65	163	69	80	No	Yes	No	No	Yes	Yes				pT4aN3aM0			No	No	No	No	Yes	No	No	No		Yes	No	Yes	No	No	91.52	28.16	7.02	339	4.54	102	45.45	75.8	10.4	26.9	3.56	2.7	0.69		Yes	No	No	No
No	Mal	58	172	85	80	No	No	No	No	Yes	No				pT4bN3bM0	Ⅲ		No	No	No	No	No	No	No	No		Yes	No	Yes	No	No	0.93	10	7.57	121	3.98	119	36.53	94.84	12.2	31.8	3.49	7.7	2.58		Yes	No	No	No
No	Mal	73	162	58	80	No	Yes	No	No	Yes	No					Ⅳ		Yes	Yes	Yes	No	Yes	No	No	No		Yes	No	Yes	No	No	6.64	16.33	8.67	127	3.74	113	29.11	71.51	10.8	29.2	4.5	1	0.24	3.18	Yes	No	No	No
No	Mal	63	154	64	90	No	No	No	No	Yes	No				T4N1M0	Ⅲ		No	No	No	No	No	No	No	No		Yes	No	No	No	No	18.51		4.69	179	4.43	147	43.93	59.5	13	29.8	2.6	2.7	0.65		Yes	No	No	No
No	Mal	51				No	No	No	No	No	No					Ⅰ		No	No	No	No	No	No	No	No		No	No	No	No	No															No	No	No	No
No	Mal	77			30	No	No	Yes	No	Yes	No							No	No	No	No	Yes	No	No	No		No	No	Yes	No	No	1.4	25.08	3.85	136	3.46	81	34.4	72.97	10.6	32.8	3.36	7	2.04		No	No	No	No
No	Mal	64	161	45	70	No	Yes	No	No	Yes	No					Ⅲ		No	No	Yes	No	Yes	No	No	No		Yes	No	Yes	No	No	4.69	37.24	5.64	120	3.14	119	35.86	83	14.1	34.4	2.3	5.5	2.19	2.54	No	No	No	No
No	Mal	88	155	60	60	No	Yes	No	No	No	Yes							No	No	No	No	Yes	No	No	No		No	No	No	No	No	1.84	17.48	9.29	356	2.04	50	28.08	60.4	14.4	34.6	3.08	2	0.46	2.22	No	No	No	No
No	Mal	45	165	51	90	No	No	No	No	Yes	No					Ⅲ		No	No	No	No	Yes	No	No	No		No	No	Yes	No	No			5.8	179	4.13	129	34.92	61.8	11.5	32.4	3.23	2.3	0.45	5.34	Yes	No	No	No
No	Fem	58	160	51	80	No	No	No	No	No	No				T1aN1M0Ib			No	No	No	No	No	No	No	No		No	No	No	No	No	2.58	10.79	3.3	193	4.32	134	51.55	53.8	11.3	27.1	2.97	0.8	0.23		No	No	No	No
No	Mal	63	164	51	70	No	No	No	No	Yes	No				pT2N1M0IIA	Ⅱ		No	No	No	No	No	No	No	No		No	No	No	No	No	14.02	21.44	5.81	222	3.76	119	38.84	76.65	12.1	31.2	3.56	16.6	>5.00	3.83	No	No	No	No
No	Mal	70	168	47.5	80	No	Yes	No	No	No	No					Ⅳ		No	No	Yes	No	No	No	Yes	No		No	No	No	No	No	1.58	21.41	4.19	140	3.6	119	45.98	63.6	12.8	30.7	2.52	1.4	0.49	4.89	No	No	No	No
No	Mal	59	164	52	80	No	No	No	No	No	No				pT4aN2M0	Ⅲ		No	No	No	No	No	No	No	No		Yes	No	Yes	No	No	0.55	4.59	5.27	163	3.64	120	37.31	63.6	14.3	35.9	2.72	0.9	0.17	2.94	Yes	No	No	No
No	Mal	73	160	48	80	No	No	No	No	Yes	No				cT4N3M1	Ⅳ		No	No	No	No	No	No	No	No		No	No	No	No	No	55.82	80.69	5	206	3.38	105	40.58	56.8	13.3	31.1	2.93	5.3	1.33	4.79	Yes	No	No	No
No	Mal	69	152	50	90	No	No	No	No	Yes	No							No	No	No	No	No	No	No	No		No	No	No	No	No	1.88	7.25	8.7	248	4.21	116	33.11	75.75	11.3	36.5	5.21	3	0.72		No	No	No	No
No	Mal	65	165	53	90	No	No	No	No	Yes	Yes				pT4N3M1	Ⅳ		No	Yes	No	No	No	No	No	No		No	No	Yes	No	No	167.74	228.01	6.16	239	4.53	143	44.43	91.7	12.1	26.1	2.12	1.4	0.24	4.97	Yes	No	No	No
No	Fem	66	145	58.5	80	No	No	No	No	Yes	Yes				sT4bN3M02	Ⅲ		No	No	No	No	No	No	No	No		No	No	Yes	No	No	2.83	472.45	6.15	319	4.28	124	39.93	58.5	13	34.2	3.51	1.4	0.3	4.04	Yes	No	No	No
No	Mal	62	159	69	90	No	No	No	No	Yes	Yes				pT3N0M0	Ⅱ		No	Yes	No	No	No	No	No	No		No	No	Yes	No	Yes			4.55	141	4.88	158	38.57	88.14	11.2	27.2	3.12	0.6	0.25	4.51	Yes	No	No	No
No	Mal	64	165	53	80	No	No	No	No	Yes	No					Ⅱ		No	No	No	No	No	No	No	No		Yes	No	No	No	No	3.22	16.1	5.6	224	4.7	144	44.97	80.6	12	30.8	3.54	1.2	0.21	5.71	No	No	No	No
No	Mal	64	167	65	80	No	Yes	No	No	Yes	No					Ⅳ		No	No	No	No	No	No	No	No		No	No	Yes	No	Yes	5.92		5.35	119	3.68	124	41.94	60.5	10.7	27.6	2.92	2.5	0.75	4.99	Yes	No	No	No
No	Mal	60	170	61	80	No	No	No	No	Yes	No							No	No	No	No	No	No	No	No		No	No	No	No	No	3.58	7.35	6	289	5.64	176	51.73	66.5	9.2	24	3.07	1.1	0.4		Yes	No	No	No
No	Mal	60	165	48.5	80	No	No	No	No	Yes	Yes				T4aN1M0			No	No	No	No	No	No	No	No		Yes	No	Yes	No	No	1.61	21.28	5.31	239	3.6	92	42.6	78.7	10.5	30.5	2.51	3.8	1.09		Yes	No	No	No
No	Mal	69	159	50	80	No	No	No	No	Yes	Yes				pT4bN2M0	Ⅲ		No	No	No	No	No	No	No	No		No	No	Yes	No	No	3.3	9.55	4.71	226	3.14	72	45.6	67	11.9	29.2	2.18	3.1	0.85		Yes	No	No	No
No	Mal	60	162	52	80	No	No	No	No	Yes	No				cT4aN1M0	Ⅲ		No	No	No	No	No	No	No	No		No	No	No	No	No	3.98	10.54	3.79	124	4.26	141	42.15	67.9	10.4	29.7	2.66	0.8	0.22		No	No	No	No
No	Mal	62	158	50	80	No	No	No	No	Yes	No				pT4aN3aM0	Ⅲ		No	No	No	No	No	No	No	No		Yes	No	No	No	No	<0.50	56.07	4.04	195	3.76	106	36.33	75.82							No	No	No	No
No	Mal	68	170	71	70	No	Yes	No	No	Yes	No							No	No	No	No	No	No	No	No		No	No	Yes	No	No	23.75	60.19	5.73	340	4.51	127	47.55	81.6	11.9	30.2	3.42	0.7	0.3	5.49	No	No	No	No
No	Mal	68	163	55	80	No	No	No	No	Yes	No				TxN3M1	Ⅳ		No	No	No	No	No	No	No	No		No	No	No	No	No			13.06	305	4.52	138	36.34	82.9	11.9	33.6	6.96	3.9	1.09	4.88	No	No	No	No
No	Mal	71	170	58	80	No	No	No	No	No	No				pT4aN2M0	Ⅲ		Yes	No	Yes	No	Yes	No	Yes	No		No	No	No	No	No	1.73	19.06	2.22	124	3.23	87	39.47	62.3	11.8	30.3	3.42	5.4	1.59		No	No	No	No
No	Mal	47	167	49	60	No	Yes	No	No	Yes	No				T4N3M0III	Ⅲ		No	No	Yes	No	No	No	Yes	No		No	No	Yes	No	No	1.14	38.41	2.01	95	3.1	101	36.44	57.7	11.5	29.9	2.5	6.9	2.11		No	No	No	No
No	Mal	64	168	60.5	70	No	No	No	No	Yes	Yes				pT4aN3bM0	Ⅲ		No	No	No	No	Yes	No	Yes	No		Yes	No	No	No	No	3.59	34.45	4.56	173	3.75	107	45.14	145	11.3	27	4.79	1	0.2	4.86	Yes	No	No	No
No	Mal	64	165	66.5	80	No	No	No	No	Yes	Yes					Ⅲ		No	No	No	No	No	No	No	No		No	No	Yes	No	No	2.32	55.81	4.84	201	3.94	110	45.08	58.9	10.2	32.2	3.02	1	0.24	5.24	Yes	No	No	No
No	Mal	65	161	44	60	No	No	No	No	Yes	No				TxN1M1			Yes	Yes	No	No	Yes	No	Yes	No		No	No	No	No	No	8.47	11.66	5.87	271	3.91	109	37.38	73.9	11.6	33.2	4.23	2.3	0.83	6.58	Yes	No	No	No
No	Mal	45	165	75	90	No	No	No	No	Yes	No				pT1aN0M0	Ⅰ		No	No	No	No	No	No	No	No		No	No	Yes	No	No	0.98	3.66	5.29	186	4.77	150	46.73	68.2	10.6	31.1	3.03	0.8	0.17		Yes	No	No	No
No	Mal	43	160	74	80	No	No	No	No	Yes	No				TxNxM1	Ⅳ		No	No	Yes	No	No	No	No	No		No	No	No	No	No	0.95	16	3.4	67	4.34	122	35.51	62.2	13.2	29.6	2.54	1	0.26		Yes	No	No	No
No	Mal	65	165	53	70	No	No	No	No	Yes	Yes				pT4bN1M1	Ⅳ		No	No	No	No	Yes	No	No	No		Yes	No	Yes	No	No	1.58	28.59	5.87	261	2.36	75	31.47	80.4	11	30.7	2.93	10.6	3.42		Yes	No	No	No
No	Fem	58	156	48	70	No	No	No	No	Yes	No					Ⅳ		Yes	No	No	No	Yes	No	No	No		Yes	No	Yes	No	No	1.55	272.57	7.06	441	3.59	81	39.32	66.7	11.7	26.4	4.37	10.9	3.3		Yes	No	No	No
No	Mal	67	171	61	80	No	Yes	No	Yes	Yes	No				rT2N1M1	Ⅳ		No	No	No	No	No	No	No	No		Yes	No	Yes	No	No	65.52	31.79	6.59	186	3.92	110	37.78	60.8	11.5	28.1	4.01	5.8	1.63	3.64	Yes	No	No	No
No	Fem	35				No	No	No	No	Yes	No				T4NxM1	Ⅳ		No	No	No	No	No	No	No	No		No	No	No	No	No	1.96	32.94	8.65	167	4.49	143	41.98	42.2	11.5	37.3	3.56	2.1	0.49		Yes	No	No	No
No	Mal	45	167	61	80	No	No	No	No	Yes	No				pT1N2M0	Ⅲ		No	No	No	No	No	No	No	No		No	No	Yes	No	No	2.64	8.93	7.83	226	4.27	159	48.52	66	10.3	25.6	2.52	0.9	0.21	5.6	Yes	No	No	No
No	Mal	68	171	73	80	No	Yes	No	Yes	No	No							No	No	No	No	No	No	No	No		No	No	No	No	No			5.67	200	5.34	162	38.62	72.7	9.9	25.6	3.36	1.6	0.46	4.72	No	No	No	No
No	Mal	75	155	48	90	No	Yes	No	No	Yes	No							No	No	No	No	No	No	No	No		No	No	No	No	No	1.56	17.07	8.59	223	4.33	137	43.06	101	10.7	31.3	3.63	2.7	0.7	3.16	No	No	No	No
No	Fem	61	160	48	80	No	No	No	No	Yes	No				cT2N0M1	Ⅳ		No	No	No	No	No	No	Yes	No		Yes	No	Yes	No	No	9.29	4960.4	5.5	228	3.52	111	45.78	58.6	13.9	36.1	2.09	2.6	0.61	3.5	Yes	No	No	No
No	Mal	44	164	60	80	No	No	No	No	Yes	No					Ⅳ		No	No	No	No	Yes	No	No	No		No	No	No	No	No	1.18	14.49	2.99	132	4.15	121	42.68	92.5	10.2	29.9	3.42	1.1	0.27		No	No	No	No
No	Mal	41	172	60	80	No	No	No	No	No	No				PT4aN3bM0	Ⅲ		Yes	No	No	No	No	No	No	No		No	No	No	No	No	2.51	5.82	4.49	153	3.64	129	50.75	55.7	13.4	30.8	2.75	0.3	0.14	3.89	No	No	No	No
No	Mal	83			20	No	Yes	No	No	Yes	No					Ⅲ		No	No	No	No	No	No	No	No		No	No	Yes	No	No			4.6	152	2.39	73	27.84	53.8	13	31.3	1.72	5	1.11		No	No	No	No
Yes	Mal	46	166	46	70	No	No	No	No	Yes	Yes				cT3NxM1	Ⅳ		No	No	No	No	Yes	No	No	No		Yes	No	No	No	No	3.94	10.17	6.51	544	4.15	77	30.27	87.2	11.8	27.1	6.17	5.5	1.37		Yes	No	No	No
No	Mal	59	166	52.5	80	No	No	No	No	Yes	No							No	No	No	No	Yes	No	No	No		No	No	No	No	No	1.33	8.81	4.69	377	3.04	73	40.18	90	12	36.3	4.37	3.9	0.77	3.5	Yes	No	No	No
No	Mal	75	150	59	90	No	No	No	No	Yes	Yes				pT3N0M0	Ⅱ		No	No	No	No	No	No	No	No		No	No	Yes	No	No			4.67	152	4.53	139	44.31	85.68	10.2	23.5	3.18	1.4	0.52	5.79	Yes	No	No	No
No	Fem	52	1.58	40	80	No	No	No	No	Yes	No				pT4aN3aM0	Ⅳ		No	No	No	No	No	No	No	No		No	No	No	No	No	3.95	281.43	3.63	108	3.58	106	41.87	58.35	11.4	29.8	2.92	0.8	0.21		No	No	No	No
No	Mal	64	160	43	80	No	No	No	No	Yes	No				cT3N1M1	Ⅳ		No	No	No	No	No	No	No	No		No	No	Yes	No	No	18.46		7.29	217	3.73	99	35.05	65.27	12.3	30.3	2.1	19.8	8.91		No	No	No	No
No	Mal	62	160	52	70	No	No	No	No	Yes	No					Ⅳ		No	No	No	No	Yes	No	No	No		Yes	No	Yes	No	Yes	6.94	681.24	5.67	383	2.87	73	31.78	46.4	13	29.2	3.86	5.3	1.3		Yes	No	No	No
No	Fem	68	145	51	80	No	Yes	Yes	No	Yes	No					Ⅰ		No	Yes	No	No	No	No	No	No		No	No	Yes	No	No	0.88	7.47	5.04	280	4.59	141	48.5	44.7	11.5	25.5	2.12	0.2	0.09	5.35	Yes	No	No	No
No	Fem	70	149	61	80	No	No	No	No	Yes	Yes	4	1	0	T4N1M0	Ⅲ	[pT4bN1M0IIIB期]	No	No	No	No	No	No	No	No		No	No	Yes	No	No	3.04	38.49	5.06	271	3.89	118	43.7	55	10.6	25.6	3.69	1.7	0.51	4.66	Yes	No	No	No
No	Mal	60	155	48	80	No	No	No	No	Yes	No					Ⅲ		No	No	No	No	No	No	No	No		No	No	No	No	No	1.78	13.43	4.58	105	3.64	114	33.29	63	13.8	33.8	3.29	0.9	0.33		No	No	No	No
No	Fem	70			60	No	No	No	No	No	No							No	No	No	No	Yes	No	No	No		No	No	No	No	No	445.4	>700.00	5.6	315	2.4	70	30.98	56	11.9	39.7	2.32	2.7	0.73		No	No	No	No
No	Mal	70	152	60	80	No	No	No	No	Yes	No					Ⅳ		No	No	No	No	No	No	No	No		Yes	No	No	No	No	1.42	7.24	7.69	306	3.78	114	32.34	82.14	11.4	33.1	4.13	3	0.5		Yes	No	No	No
No	Mal	78	166	41	80	No	No	No	No	Yes	No							No	No	No	No	No	No	No	No		No	No	No	No	No			5.31	223	3.88	108	36.58	72.86	12.7	31.8	4.5	1.2	0.28		No	No	No	No
No	Fem	70	148	40	80	No	Yes	No	No	No	No					Ⅳ		No	No	No	No	Yes	No	No	No		No	No	Yes	No	No	<0.50	3.67	5.29	235	3.89	108	31.21	60.44	11.2	44.9	6.54	5.8	1		Yes	No	No	No
No	Mal	61	164	58	80	No	No	No	No	Yes	No							No	No	No	No	No	No	No	No		No	No	No	No	No	<0.50	8.49	5.62	183	4.21	134	45.42	69.1	10.2	26.3	2.87	0.6	0.12	5.74	Yes	No	No	No
No	Fem	62	150	56		No	No	No	No	Yes	No					Ⅳ		No	No	No	No	No	No	No	No		No	No	No	No	No	<0.50	15.8	4.79	206	3.99	132	38.43	72.9	11.6	26.6	4.64	10.9	3.68	3.15	Yes	No	No	No
No	Mal	46	172	72	80	No	No	No	No	Yes	No					Ⅳ		No	No	No	No	No	No	No	No		Yes	No	Yes	No	No	2.86	10.68	6.45	217	4.56	141	52.92	95.9	11.5	35.7	2.36	0.3	0.1		Yes	No	No	No
No	Mal	47	162	47	80	No	No	No	No	No	No					Ⅲ		No	No	No	No	No	No	Yes	No		No	No	No	No	No			4.3	154	4.35	127	42.37	82.8	12.8	25.6	3.09	2.7	1.99		No	No	No	No
No	Mal	71	156	45	70	No	No	No	No	Yes	No							No	No	Yes	No	Yes	No	No	No		Yes	No	No	No	No	1.46	131.97	3.61	141	3.32	91	35.52	89.72	11.4	41.1	2.54	10.3	3.3		No	No	No	No
No	Fem	59	159	60	80	No	No	No	No	Yes	No							No	No	No	No	No	No	No	No		No	No	Yes	No	No		9.15	6.29	171	4.01	126	46.35	62.7	12.3	26.2	2.21	1.7	0.43	3.9	Yes	No	No	No
No	Mal	60	171	69	80	No	No	No	No	Yes	No					Ⅰ		No	No	No	No	No	No	No	No		Yes	No	Yes	No	No	2.61	19.58	5.58	165	5.97	141	49.71	60.7	10.5	25.5	2.62	0.9	0.14		Yes	No	No	No
No	Mal	60	172	48.5	70	No	Yes	No	No	Yes	No							No	No	No	No	No	No	No	No		No	No	No	No	No	<0.50	8.95	3.05	84	3.88	126	39.58	72.23	13.6	31.9	2.47	0.9	0.21	3.58	Yes	No	No	No
No	Mal	63	166	56	90	No	Yes	No	No	Yes	No					Ⅳ		No	No	Yes	No	No	No	No	No		Yes	No	No	No	No	3.43	1.34	4.26	204	4.09	130	47.8	70.65	10.9	28.5	3.49	0.8	0.17	5.42	No	No	No	No
No	Mal	66	166	85	80	No	Yes	No	No	No	No							No	No	No	No	No	No	No	No		No	No	No	No	No	3.04	22.39	6.45	250	5.21	162	49.39	73.2	10.2	20.9	2.88	1.2	0.21	5.63	Yes	No	No	No
No	Mal	50	171	68	80	No	No	No	No	Yes	No					Ⅱ		No	No	No	No	No	No	No	No		Yes	No	Yes	No	No	3.02	10.11	5.61	165	4.7	161	39.48	77.4	10.3	27	2.51	0.6	0.1	2.52	Yes	No	No	No
No	Mal	51	165	52.5	80	No	No	No	No	Yes	No							No	No	No	No	No	No	No	No		Yes	No	Yes	No	No	8.61	6.54	5.34	254	4.25	133	35.98	72.2	12.4	26.9	3.61	0.9	0.2	4.77	Yes	No	No	No
No	Mal	56	178	78	70	No	No	No	No	No	No					Ⅳ		Yes	Yes	No	No	Yes	No	No	No		No	No	No	No	No	3.4	84.88	8.4	217	3.59	119	33.64	51.6	13.6	29.3	2.6	9.9	3.38		No	No	No	No
No	Mal	44	175	70	80	No	No	No	No	Yes	Yes					Ⅱ		No	No	No	No	Yes	No	Yes	No		Yes	No	Yes	No	No	<0.50	10.42	3.99	230	3.8	109	36.76	72.2	12.5	32.8	2.84	1.2	0.26	2.89	Yes	No	No	No
No	Mal	40	158	50	70	No	No	No	No	Yes	Yes					Ⅲ		No	No	Yes	No	Yes	No	No	No		Yes	No	Yes	No	No	0.61	15.55	10	524	3.9	100	33.39	48.1	13.8	35.9	4.51	8.3	2.28		Yes	No	No	No
No	Mal	77	163	49	80	No	No	No	No	Yes	No					Ⅲ		No	No	No	No	No	No	No	No		No	No	No	No	No			3.42	217	4.22	121	27.26	61.54	11.3	30.3	3.25	6.6	1.44	2.86	No	No	No	No
No	Mal	79	169	67	70	No	Yes	No	Yes	Yes	No					Ⅳ		No	No	No	No	Yes	No	Yes	No		No	No	No	No	No	2.56	1	4.8	181	3.5	98	29.67	84.4	11.2	33.1	3.91	3.2	0.81	3.05	No	No	No	No
No	Mal	70	162	48	80	No	Yes	No	Yes	Yes	No							No	No	No	No	No	No	No	No		No	No	No	No	No	147.03	92.42	7.06	298	4.83	114	33.21	56.1	12.2	28.4	4.77	1.7	0.36	4.13	No	No	No	No
No	Mal	66	168	52	80	No	Yes	No	No	Yes	No					Ⅲ		Yes	No	No	No	No	No	No	No		Yes	No	No	No	No	3.81	7.69	4.94	191	4.13	127	34.14	42.04	10.6	34.8	3.29	0.6	0.14	0.62	No	No	No	No
No	Mal	77	155	45	70	No	No	No	No	Yes	No					Ⅳ		No	No	No	No	No	No	No	No		No	No	No	No	No	3562	16.1	7.34	169	4.11	124	45.07	87.4	11.1	25.6	1.44	58.4	12.09		No	No	No	No
No	Mal	78	176	74	70	No	No	No	Yes	Yes	No					Ⅳ		No	No	No	No	No	No	No	No		No	No	No	No	No	28.56	153.22	10.99	212	4.6	135	41.29	94.73	11.5	28	5.82	2.4	0.79		No	No	No	No
No	Mal	59	172	80	90	No	No	No	No	Yes	No					Ⅱ		No	No	No	No	No	No	No	No		No	No	Yes	No	No	1.79	43.56	5.86	168	5.34	146	42.57	77.2	10.2	27.9	2.47	1	0.14		Yes	No	No	No
No	Fem	68	151	55.5	80	No	Yes	No	No	Yes	Yes					Ⅲ		No	No	No	No	No	No	No	No		Yes	No	Yes	No	No	<0.50	16.32	4.15	156	4.69	139	47.35	61.3	10.1	26.3	3.07	1.4	0.37		Yes	No	No	No
No	Mal	60	162	52	70	No	No	No	No	Yes	No					Ⅳ		No	No	No	No	Yes	No	No	No		No	No	No	No	No	4.25	120.06	5.33	99	2.91	79	31.85	67.9	13.5	51.9	1.93	73.2	>5.00		No	No	No	No
No	Fem	53	155	55	70	No	No	No	No	Yes	Yes					Ⅲ		No	No	No	No	No	No	No	No		Yes	No	Yes	No	No	<0.50	12.66	3.91	265	3.57	103	36.27	56.37	9.9	24	3.02	1.8	0.67		Yes	No	No	No
No	Mal	67	165	61	70	No	No	No	No	Yes	Yes					Ⅱ		No	No	No	No	No	No	No	No		No	No	Yes	No	No	1.35	9.79	9.46	250	4.6	133	38.73	64.1	11.2	28.8	4.94	3.2	1.44		Yes	No	No	No
No	Mal	64	161	50	90	No	No	No	No	Yes	No					Ⅲ		No	No	No	No	No	No	No	No		No	No	No	No	No	1.81	19.75	5.71	178	4.41	133	41.95	56.8	11.2	26.2	2.82	1.6	0.38		No	No	No	No
No	Fem	64	158	50	70	No	Yes	No	No	Yes	No					Ⅳ		No	No	No	No	No	No	No	No		No	No	Yes	No	No	2.5	105.79	8.1	342	5.43	104	32.8	40.3	13.1	28.4	4.23	21.8	7.27		No	No	No	No
No	Mal	49	159	60	90	No	No	No	No	Yes	No							No	No	No	No	No	No	No	No		No	No	Yes	No	No	1.09	10.02	4.36	139	3.95	129	39.26	125.35	11.7	25	2.25	0.7	0.18		Yes	No	No	No
No	Mal	67	158	65	90	No	No	No	No	Yes	Yes					Ⅲ		No	No	No	No	No	No	No	No		No	No	Yes	No	No			3.24	114	2.94	91	31.85	62.2	15.3	27.7	2.1	0.5	0.18	2.71	Yes	No	No	No
No	Mal	53	156	50	60	No	No	No	No	Yes	No					Ⅳ		No	No	No	No	No	No	No	No		No	No	No	No	No	17.87	46759	7.73	231	4.6	139	33.58	57.7	12.7	31.7	3.56	36.8	11.58	1.94	Yes	No	No	No
No	Mal	53	165	65	60	No	Yes	No	No	Yes	Yes					Ⅳ		Yes	No	No	No	Yes	No	No	No		No	No	Yes	No	No	18.9	39.12	8.69	128	2.42	62	30.57	142.4	19.8	36.3	1.06	98.3	22.83		No	No	No	No
No	Mal	60	174	47	70	No	No	No	No	Yes	No					Ⅱ		No	No	No	No	Yes	No	No	No		No	No	Yes	No	No	0.74	36.59	3.74	97	3.54	94	35.41	62.49	12.4	32.1	3.91	4.3	1.08		No	No	No	No
No	Fem	67	149	40	50	No	No	No	No	Yes	Yes					Ⅳ		No	No	No	No	Yes	No	No	No		No	No	Yes	No	No	4.05	30.18	5.7	248	2.44	80	25.75	43.9	16.4	26.7	1.06	7.1	1.64	0.91	Yes	No	No	No
No	Mal	62	159	54	90	No	No	No	No	Yes	No					Ⅰ		No	No	No	No	No	No	No	No		Yes	No	Yes	No	No	1.38	11.79	7	210	4.54	147	41.77	83.2	12.8	27.8	2.64	0.4	0.18	5.87	Yes	No	No	No
No	Mal	70	154	38	70	No	No	Yes	No	Yes	No					Ⅲ		No	No	Yes	No	Yes	No	No	No		Yes	No	No	No	No	1.22	29.44	4.56	116	2.77	100	33.05	57.3	12.8	31.9	2.02	1.7	0.81		No	No	No	No
No	Mal	58	168	42	70	No	No	No	No	Yes	No					Ⅳ		No	Yes	Yes	No	Yes	No	No	No		Yes	No	No	No	No	2.37	9.6	5.62	189	3.88	123	39.25	51.4	12.8	33.8	3.13	3.4	0.88		No	No	No	No
No	Mal	83			50	No	Yes	No	No	Yes	Yes							No	No	No	No	Yes	No	No	No		No	No	No	No	No	50.2	16.84	4.49	116	2.21	62	25.24	79.8	14.1	33.1	2.52	9.5	2.51		No	Yes	No	No
No	Fem	71	160	74	80	No	No	No	No	No	No							No	No	No	No	No	No	No	No		No	No	No	No	No			6	184	4.82	155	47.86	71.7	12.1	25.6	2.36	3.2	0.77		Yes	No	No	No
No	Mal	78	148	47	70	No	No	No	No	Yes	No							No	No	No	No	No	No	No	No		Yes	No	No	No	No	1.39	11	8.53	157	3.7	126	38.3	71.2	11	27.1	2.66	4.1	1.1		No	No	No	No
No	Mal	59			40	No	Yes	No	No	No	No							No	No	No	No	No	No	No	No		No	No	No	No	No	<0.50	26.96	7.03	272	3.78	121	45.19	47	12.7	32.6	2.75	2.9	0.9		No	No	No	No
No	Mal	61	157	50	80	No	No	No	No	Yes	No					Ⅲ		No	No	No	No	No	No	No	No		Yes	No	Yes	No	No	<0.50	8.18	5.61	157	3.62	111	38.92	61.6	13.4	24.6	3.71	1.9	0.54	3.72	Yes	No	No	No
No	Fem	43	142	43	80	No	No	No	No	Yes	No					Ⅳ		No	No	No	No	No	No	Yes	No		No	No	Yes	No	No	<0.50	20.79	7.46	438	3.88	116	37.76	38.6	11.2	28	4.24	3.3	0.93		Yes	No	No	No
No	Mal	68	155	43	70	No	No	No	No	Yes	No							No	No	No	No	No	No	No	No		No	No	Yes	No	No	19.22	2.35	6.1	121	3.51	122	43.07	71.9	13	32.2	2.2	5.3	1.55		Yes	No	No	No
No	Mal	73	162	45	80	No	No	No	No	Yes	No							No	No	No	No	No	No	No	No		No	No	No	No	No	2.64	8.86	4.25	190	4.66	133	46.35	82.3	9.5	32.1	2.22	0.7	0.12		No	No	No	No
No	Fem	52	150	61	80	No	Yes	No	Yes	No	No							No	No	No	No	No	No	No	No		No	No	Yes	No	No			7.96	252	4.68	137	48.13	83.1	11.7	22.6	2.7	0.2	0.11	7.38	Yes	No	No	No
No	Mal	46	164	51	80	No	No	No	No	Yes	No					Ⅳ		No	No	No	No	Yes	No	Yes	No		Yes	No	No	No	No	0.62	6.73	5.01	299	3.81	121	34.04	66.9	11.2	29.1	2.87	7.2	2.42	3.55	No	Yes	No	No
No	Fem	50	160	55	80	No	No	No	No	Yes	No					Ⅱ		No	Yes	No	No	No	No	No	No		No	No	Yes	No	No	<0.50	6.26	5.71	289	4.1	128	50.01	55.2	10.6	23.5	2.78	1.8	0.53	6.12	Yes	No	No	No
No	Mal	63	166	45	80	No	No	No	No	Yes	No					Ⅲ		No	No	No	No	No	No	No	No		Yes	No	Yes	No	No	12.71	29.59	4.61	171	4.33	133	42.62	67.7	13.1	34.3	3.18	1.2	0.23	5.14	Yes	Yes	No	No
No	Fem	64	158	50	70	No	No	No	No	Yes	No					Ⅰ		No	No	No	No	No	No	No	No		Yes	No	Yes	No	No	1.29	19.59	4.32	313	3.94	83	36.91	66.3	12	37	3.23	1.9	0.55		No	Yes	No	No
No	Fem	51	153	44.5	80	No	No	No	No	Yes	No					Ⅳ		No	No	No	No	No	No	No	No		No	No	No	No	No	0.67	83.18	4.46	322	4.09	123	28.31	83.7	10.5	28.3	4.24	2.7	0.76	3.42	No	No	No	No
No	Mal	55	164	60	90	No	No	No	No	No	Yes					Ⅲ		No	No	No	No	No	No	No	No		No	No	Yes	No	No	2.4	7.9	7.31	248	4.42	144	40.1	65.3	11.6	28.7	4.5	6.6	1.69	4.3	Yes	No	No	No
No	Mal	74	151	44	80	No	No	No	No	Yes	No							No	No	No	No	Yes	No	No	No		No	No	No	No	No	3.46	8.26	4.22	176	4.24	88	32.38	63.9	11.9	31.8	3.02	2.8	0.7	3.17	Yes	No	No	No
No	Mal	72	164	55	80	No	No	No	No	Yes	No					Ⅲ		No	No	Yes	No	No	No	Yes	No		No	No	Yes	No	No	4.32	24.91	3.87	165	3.71	111	34.75	61.5	12.6	28.5	4.64	3.1	0.84	4.03	No	No	No	No
No	Mal	69	160	45	60	No	No	No	No	Yes	No					Ⅳ		No	No	No	No	Yes	No	No	No		No	No	No	No	No	18.31	6.51	11.48	529	2.97	76	24.1	74.5	15.1	39.6	2.82	4.8	1.06	3.4	Yes	No	No	No
No	Mal	68	166	58	90	No	No	No	No	Yes	No					Ⅳ		No	Yes	No	No	Yes	No	No	No		No	No	Yes	No	No	9.66	174.86	5.18	330	3.29	71	42.61	41.6	12.1	27.9	2.87	3.2	0.73	3.46	No	Yes	No	No
No	Mal	58	165	67	80	No	No	No	No	Yes	No					Ⅰ		No	Yes	No	No	No	Yes	No	No		No	No	No	No	No	0.5	8	6.05	175	5.14	156	51.42	60.8	13	27.7	1.92	1.5	0.37	4.93	Yes	No	No	No
No	Mal	52	165	54	80	No	No	No	No	Yes	No					Ⅰ		No	No	No	No	No	No	No	No		Yes	No	Yes	No	No	1	10.42	5.35	166	3.8	129	36.8	70.1	11.8	25.5	3.23	1.8	0.46		Yes	No	No	No
No	Mal	60	167	59	80	No	No	No	No	Yes	No					Ⅲ		No	No	No	No	Yes	No	No	No		Yes	No	Yes	No	No	1.26	16.95	5.81	224	3.89	126	39.54	75.6	14	30	2.5	1.7	0.3		Yes	No	No	No
Yes	Fem	74	155	29	60	No	Yes	No	No	Yes	No							No	No	Yes	No	No	No	No	No		Yes	No	No	No	No	1.67	21.07	5.2	259	3.5	112	37.05	53.3	13	25	1.95	10.3	2.77	8.97	Yes	Yes	No	No
No	Mal	83	162	55	70	No	No	No	No	Yes	No					Ⅳ		No	No	No	No	Yes	No	No	No		Yes	No	No	No	No	3.79	102.22	5.43	142	3.2	87	35.93	120.7	11.6	30.6	2.7	7.6	1.74		No	Yes	No	No
No	Mal	60	175	71	90	No	No	No	No	Yes	No							No	No	No	No	No	No	No	No		No	No	No	No	No	2.53		8.71	236	4.92	147	44.11	84	10.4	33.5	3.71	1.3	0.26	5.51	Yes	No	No	No
No	Fem	42	160	40.5	80	No	No	No	No	Yes	No							No	No	No	No	No	No	No	No		No	No	No	No	No	7.53	38.61	5.7	250	3.86	115	41.23	66.6	13.1	30.6	3.68	2.8	0.86	4.22	Yes	No	No	No
No	Mal	58	168	62	90	No	No	No	No	Yes	Yes					Ⅲ		No	No	No	No	No	No	No	No		No	No	Yes	No	No	1.46		4.3	95	4.37	141	42.34	64.1	11.7	30.8	3.07	0.6	0.1		Yes	No	No	No
No	Mal	69	154	55	80	No	No	No	No	Yes	Yes					Ⅲ		No	No	Yes	No	Yes	No	No	No		No	No	Yes	No	No	1.48	10.02	4.33	142	4.24	97	40.78	82.9	10.8	25.7	2.36	0.9	0.19	3.26	Yes	No	No	No
No	Mal	52	170	58	80	No	No	No	No	Yes	No							Yes	No	Yes	No	Yes	No	No	No		No	No	No	No	No	4.26	870.01	4.18	122	3.18	103	38.18	59.3	13.2	30.6	3.54	8.8	1.13	3.63	Yes	No	No	No
No	Fem	50	154	49	80	No	No	No	No	Yes	No					Ⅰ		No	No	No	No	No	No	No	No		No	No	No	No	No	<0.50	7.45	4.23	191	4.62	115	46.99	59.7	12.1	27.4	2.45	2.1	0.74		No	No	No	No
No	Mal	47	160	54	80	No	No	No	No	Yes	No					Ⅲ		No	No	Yes	No	No	No	No	No		No	No	No	No	No	5.06	4.42	5.35	96	4.71	143	42.41	65.2	12.4	27.3	2.21	1.2	0.23	3.97	Yes	No	No	No
No	Fem	49	147	51	90	No	No	No	No	Yes	No					Ⅳ		No	No	No	No	Yes	No	No	No		No	No	No	No	No			11.14	356	3.12	89	42.14	57.6	11.4	26	5.82	9.1	2.22	4.4	Yes	No	No	No
No	Fem	68	149	47	90	No	No	No	No	Yes	No	2	0	0	T2N0M0	Ⅰ	[pT2N0MOI期]	No	No	No	No	No	No	No	No		No	No	No	No	No	0.62	34.87	5.3	220	4.2	132	44.6	52							Yes	No	No	No
No	Mal	72	165	49.5	80	No	No	No	No	Yes	No					Ⅳ		No	No	No	No	Yes	No	No	No		No	No	No	No	No	21.02	10.72	4.81	214	3.73	109	38.16	84.1	12.2	27.3	3.61	1.2	0.27	5.98	No	No	No	No
No	Fem	74	149	43	60	No	Yes	No	No	No	Yes							Yes	Yes	No	No	Yes	No	No	No		No	No	Yes	No	No	7.07	11.56	7.75	205	2.04	65	41.22	300.1	12	27.7	5.18	5.7	1.15	7.56	No	No	No	No
No	Mal	77	155	45.5	80	No	No	No	No	Yes	No							No	No	Yes	No	No	No	No	No		Yes	No	Yes	No	No			4.31	229	3.96	119	44.73	81.3	13.6	30.7	3.13	1.6	0.5		Yes	Yes	No	No
No	Mal	71	165	42	50	No	No	No	No	Yes	Yes							No	No	No	No	Yes	No	No	No		No	No	Yes	No	No	2.13	13.12	2.31	233	2.74	67	34.7	59	13.6	34	2.93	1.4	0.26		Yes	No	No	No
No	Mal	76	167	51	80	No	No	No	No	Yes	No					Ⅲ		No	No	No	No	Yes	No	No	No		No	No	No	No	No	<0.50		4.94	192	2.95	87	32.9	48.6							No	No	No	No
No	Mal	51	171	57	90	No	No	No	No	Yes	No					Ⅰ		No	Yes	Yes	No	Yes	No	No	No		No	No	Yes	No	No	1.05	9.43	6.01	184	4.98	154	41.18	71.1	12.4	30.7	3.17	0.3	0.09	3.94	Yes	No	No	No
No	Mal	58	170	67	60	No	No	No	No	Yes	Yes					Ⅳ		Yes	No	No	No	Yes	No	No	No		No	No	Yes	No	No	54.67	9.66	9.75	368	3.27	60	41.06	54.6	13.4	30.3	4.51	4.7	0.78	2.84	Yes	No	No	No
No	Mal	59	173	75	70	No	No	No	No	No	No					Ⅳ		No	No	No	No	No	No	No	No		No	No	No	No	No	<0.50	7207	6.35	217	3.82	123	35.75	96.6	13.6	27.6	4.32	18.5	5.35	3.99	Yes	No	No	No
No	Mal	66	161	70	90	No	No	No	No	Yes	No					Ⅳ		No	No	No	No	No	No	No	No		Yes	No	Yes	No	No	0.56		10.79	235	5.01	149	47.47	89.7	12.6	30.3	3.86	2.2	0.46	4.45	No	Yes	No	No
No	Mal	68	171	45	90	No	No	Yes	No	Yes	No							No	No	No	No	No	No	No	No		No	No	No	No	No	15.09	328.19	6.33	226	4.41	133	42.07	55.7	11.1	30.5	3.91	6.4	1.56		Yes	No	No	No
No	Mal	74			50	No	No	No	No	Yes	No					Ⅳ		Yes	Yes	No	No	No	No	No	No		No	No	Yes	No	No	8.55		10.35	291	3.26	104	34.79	78.5	12.6	29.2	3.91	8.3	2.21		No	No	No	No
No	Mal	42	160	51.5	90	No	No	No	No	Yes	No							Yes	No	No	No	No	No	No	No		No	No	No	No	No	<0.50	7.81	11.4	267	4.89	147	48.98	73.7	13.1	28	3.86	2.3	0.48	4.63	Yes	No	No	No
No	Fem	45	160	54	90	No	No	No	No	Yes	No					Ⅰ		No	Yes	No	No	No	No	Yes	No		Yes	No	Yes	No	No	<0.50	17.76	5.05	237	3.83	118	44.51	49.5	12.1	25.9	2.02	0.2	0.09		Yes	No	No	No
No	Mal	57	165	52	80	No	No	No	No	Yes	No					Ⅱ		No	No	No	No	No	No	No	No		No	No	Yes	No	No	2.9	21.45	3.43	106	3.72	124	36.96	71.2	11.6	32.2	1.82	0.5	0.1	2.93	Yes	No	No	No
No	Mal	62	160	58	60	No	No	No	No	Yes	No					Ⅳ		No	Yes	Yes	No	Yes	No	No	No		No	No	Yes	No	No	<0.50	21.31	2.36	117	4	97	32.06	54.5	13.7	39.7	4.94	3.1	0.63		Yes	No	No	No
No	Mal	70	170	55	70	No	Yes	No	No	Yes	No					Ⅳ		No	No	No	No	No	No	No	No		No	No	No	No	No	63.97	5.02	4.6	188	4.39	132	40.13	92.6	12.4	28.6	4.94	2.4	0.45		Yes	No	No	No
No	Fem	53	160	49	80	No	No	No	No	Yes	No					Ⅱ		No	No	No	No	Yes	No	Yes	No		No	No	Yes	No	No	2.87	11.31	6.61	248	3.93	125	42.59	78.7	11.5	26	2.3	0.3	0.08	3.81	Yes	No	No	No
No	Mal	90			50	No	Yes	No	No	Yes	Yes							Yes	Yes	No	No	Yes	No	No	No		No	No	Yes	No	No			10.59	169	2.14	43	31.03	110.2	14.9	28.3	2.47	5.1	1.03	1.83	No	No	No	No
No	Fem	51	150	48	90	No	No	No	No	Yes	No					Ⅲ		No	No	No	No	No	No	No	No		No	No	Yes	No	No	<0.50		9.51	191	4.22	131	49.61	64.8	11.8	23.1	2.82	1.2	0.24	5.93	Yes	No	No	No
No	Mal	69	167	53.5	90	No	No	No	No	Yes	Yes					Ⅱ		No	No	No	No	No	No	No	No		No	No	Yes	No	No	1.2		8.02	108	4.34	136	40.7	61.9	12.1	28.3	2.43	1	0.25		Yes	No	No	No
No	Fem	58	157	52	90	No	No	No	No	No	No							No	No	No	No	No	No	No	No		Yes	No	Yes	No	No	0.75	4.45	3.32	189	4.19	132	47.7	52.2	11.9	23.9	2.52	0.7	0.18		Yes	No	No	No
No	Mal	69	160	61	80	No	No	No	No	No	No							No	Yes	No	No	No	No	No	No		No	No	No	No	No	2.75	17.41	6.22	158	5.72	121	44.88	67.7	11.3	28.5	2.33	1.2	0.32	4.37	Yes	No	No	No
No	Fem	73	1.54	43	90	No	No	No	No	Yes	No					Ⅱ		No	No	No	No	No	No	No	No		No	No	Yes	No	No	2.3		2.75	70	3.14	93	42.06	88.2	12.7	37.8	3.29	1.4	0.27	4.92	No	No	No	No
No	Fem	54	156	39	70	No	No	No	No	Yes	No					Ⅳ		No	No	No	No	No	No	No	No		No	No	No	No	No	85.32	1052.2	5.16	312	3.54	111	32.23	164.5	10.7	31.2	4.94	2.1	0.66		No	No	No	No
No	Mal	62	160	57	80	No	No	No	No	Yes	No					Ⅳ		Yes	No	No	No	No	No	No	No		No	No	Yes	No	No	35.47	2763.9	9.32	156	3.08	91	35.84	70.9	15	28.8	2.02	73.7	>10.00		No	No	No	No
No	Mal	64	170	72	80	No	No	No	No	Yes	No					Ⅰ		No	Yes	No	No	No	No	No	No		No	No	Yes	No	No	0.79	8.9	4.77	92	3.9	115	38.9	78.3	13.1	32.2	1.96	2.7	0.71	3.29	Yes	No	No	No
No	Mal	40	169	69	80	No	No	No	No	Yes	No					Ⅲ		No	No	No	No	No	No	No	No		Yes	No	No	No	No	14.17	17.99	5.94	205	4.49	134	39.15	106.7	13.2	29.7	3.71	11.2	3.69		No	Yes	No	No
No	Mal	57	177	83	90	No	No	No	No	Yes	No	1	0	0	T1N0M0	Ⅰ	[T1N0M0]	No	No	No	No	No	No	No	No		No	No	Yes	No	No	1.44	4.96	7.38	239	4.66	155	45.16	87.9	10.1	26.7	2.7	1.2	0.04	4.37	Yes	No	No	No
No	Fem	73	151	45	70	No	No	No	No	Yes	No					Ⅱ		No	No	Yes	No	No	No	No	No		Yes	No	Yes	No	No	2.27	6.01	3.49	236	3.6	105	43.16	61.5	17.6	30.5	2.54	1.3	0.39		No	No	No	No
No	Fem	29	158	59	90	No	No	No	No	Yes	Yes							No	No	No	No	No	No	Yes	No		No	No	No	No	No	0.72	22.14	8.51	587	4.06	111	36.07	35.9	13.8	22.4	5	228.4	>5.00	1.07	Yes	No	No	No
No	Fem	42	156	56	70	No	No	No	No	Yes	No					Ⅲ		No	No	No	No	No	No	No	No		Yes	No	Yes	No	No	1.2	11.62	4.01	337	3.98	117	45.71	54.1	12.5	31	3.23	1.2	0.33		Yes	No	No	No
No	Fem	69			50	No	Yes	No	Yes	Yes	No					Ⅳ		No	Yes	No	No	Yes	No	No	No		No	No	Yes	No	No	>100.00		11.46	442	3.42	85	25.17	83.3	12.6	25.1	3.54	22.9	6.24	1.26	Yes	No	No	No
No	Mal	54	163	63	90	No	No	No	No	Yes	No					Ⅳ		No	No	No	No	No	No	No	No		No	No	No	No	No	26.65	7.91	6.39	215	4.74	129	40.68	83.5	13.1	31.5	4.01	1.7	0.33		Yes	No	No	No
No	Mal	69	163	55	80	No	No	No	No	Yes	Yes							Yes	No	No	No	Yes	No	No	No		No	No	Yes	No	No	12.02	13.76	5.01	190	2.05	53	35.02	69.2	12.5	32	1.27	19.1	4.11		No	No	No	No
No	Mal	72	155	40	70	No	No	No	No	Yes	Yes					Ⅳ		Yes	No	No	No	Yes	No	No	No		Yes	No	No	No	No	21.25	369.33	3.09	112	3.56	105	37.31	70	14.8	33.5	3.23	2.2	0.6		No	No	No	No
No	Mal	54	178	55	80	No	Yes	No	No	Yes	No					Ⅲ		No	No	No	No	No	No	No	No		Yes	No	Yes	No	No	1.71	1	6.22	350	5.11	111	43.05	71.7	12	27.4	4.01	0.8	0.19	4.16	Yes	Yes	No	No
No	Fem	63	155	49	80	No	No	No	No	Yes	No							No	No	No	No	No	No	No	No		No	No	Yes	No	No	1.54	14.89	4.29	117	3.92	117	45.82	42.9	11.9	26.7	2.43	0.4	0.1	3.41	Yes	No	No	No
No	Mal	59	170	47	80	No	No	No	No	Yes	No					Ⅳ		No	Yes	No	No	Yes	No	No	No		No	No	No	No	No	>1000.00	6.35	13.59	399	3.72	109	32.78	49.8	12.9	29.8	6.54	71.3	>10.00	3.27	Yes	No	No	No
No	Fem	51	162	56	90	No	No	No	No	Yes	No					Ⅲ		No	No	No	No	No	No	No	No		No	No	Yes	No	No	1.17	19.99	4.34	189	4.63	135	50.02	47.3						4.96	Yes	No	No	No
No	Mal	65	170	51	90	No	No	No	No	Yes	No					Ⅱ		No	No	No	No	No	No	No	No		Yes	No	Yes	No	No	0.67	10.96	7.08	298	4.71	143	43.33	73.5	11.8	27.3	2.07	3.1	0.81	6.11	Yes	No	No	No
No	Fem	65	145	48	70	No	Yes	No	No	Yes	No					Ⅲ		No	No	No	No	No	No	No	No		Yes	No	Yes	No	No	0.7	17	7.9	362	3.85	108	45.98	54.6	12.4	26.2	5.12	4.6	1.15	6.46	Yes	No	No	No
No	Mal	76	169	76	70	No	No	No	No	No	No					Ⅰ		No	No	Yes	No	No	No	No	No		No	No	Yes	No	No	2.16	15.71	9.38	164	4.49	139	39.49	66.3	11.6	27	4.24	7.8	1.68		Yes	No	No	No
No	Fem	75	162	70	80	No	No	No	No	No	No							No	No	No	No	No	No	No	No		No	No	No	No	No	0.7	12.1	5.3	191	4.05	134	44.3	68.9	12.1	25.6	2.59	1.6	0.34		Yes	No	No	No
No	Mal	48	165	50	80	No	No	No	No	Yes	No					Ⅲ		Yes	No	Yes	No	Yes	No	Yes	No		Yes	No	Yes	No	No	0.69	13.8	3.87	161	4.19	76	39.5	76.9	11.3	30	1.84	1.3	0.34	3.08	No	Yes	No	No
No	Fem	89	147	35	80	No	No	No	No	Yes	No					Ⅱ		No	No	No	No	No	No	No	No		No	No	No	No	No	38.19	16.45	4.08	142	3.53	104	43.14	65.2	13.1	30.3	5	2	0.39	4.2	Yes	No	No	No
No	Mal	45	152	44	70	No	No	No	No	No	No					Ⅳ		Yes	No	No	No	Yes	No	No	No		No	No	Yes	No	No	<0.50	589.14	4.76	432	3.21	57	34.22	49.4	13.2	32.6	4.5	4.2	0.78		No	No	No	No
No	Mal	80	157	45	70	No	Yes	No	No	No	No							No	No	No	No	Yes	No	No	No		Yes	No	No	No	No	3.67	22.31	5.15	215	3.45	106	39.45	89.2	11.9	30.1	4.94	5.3	1.3		No	Yes	No	No
No	Mal	74	165	52	70	No	No	No	No	Yes	No							No	No	No	No	No	No	No	No		No	No	No	No	No	5.47	3.78	6.32	324	4.3	132	36.44	64.8	12.3	29.6	6.17	2.4	0.55	3.75	No	No	No	No
No	Mal	58	167	54	80	No	Yes	No	Yes	Yes	Yes					Ⅲ		Yes	No	Yes	No	No	No	No	No		No	No	Yes	No	No	3.68	429.61	5.6	375	3.09	72	41.08	57.5	13.1	33.2	4.67	9.9	2.81		Yes	No	No	No
No	Fem	71	146	51.5	70	No	Yes	No	Yes	Yes	No					Ⅳ		No	No	No	No	No	No	No	No		No	No	No	No	No	1	22.12	6.8	342	3.94	97	37.04	49.5	13.1	27.1	4.23	16.3	3.22		No	No	No	No
No	Mal	89			20	No	No	No	No	No	Yes							Yes	No	No	No	No	No	No	No		No	No	Yes	No	No			7.3	139	3.69	101	40.06	85.8	13.6	30.7	3.02	7.1	1.47	3.66	No	No	No	No
No	Mal	63	155	50	80	No	No	No	No	Yes	No	3	0	0	T3N0M0	Ⅱ		No	No	No	No	No	No	No	No		No	No	No	No	No	1.07	17.58	5.13	201	3.96	126	27.98	72.5							Yes	No	No	No
No	Mal	65	163	57	70	No	Yes	No	Yes	Yes	No					Ⅳ		No	No	No	No	No	No	No	No		Yes	No	Yes	No	No	13.15	202	7.01	225	4.77	147	43.05	110.5	12	27.7	2.66	4.2	1.08	5.38	Yes	Yes	No	No
No	Mal	67	165	52	70	No	No	No	No	Yes	Yes					Ⅳ		No	Yes	Yes	No	Yes	No	Yes	No		No	No	Yes	No	No	1.78	7.12	6.65	287	4.43	129	40.39	83.7	12.2	23.9	3.18	3.6	0.8	4.48	Yes	No	No	No
No	Mal	42	179	159	80	No	No	No	No	No	No							No	No	No	No	Yes	No	No	No		No	No	Yes	No	No			6.29	102	3.23	102		57.8							No	No	No	No
No	Mal	58	168	64	90	No	No	No	No	Yes	Yes							No	No	No	No	Yes	No	No	No		No	No	Yes	No	No			5.23	160	3.15	87	37.21	67.4	10.6	29.3	3.56	3.3	0.86	4.2	No	No	No	No
No	Fem	77	152	36.5	70	No	No	No	No	Yes	Yes							No	No	No	No	Yes	No	No	No		No	No	Yes	No	No	2.48	3.77	6.42	266	3.62	65	37.11	47.4	13.9	32.2	3.61	3	0.69	4.18	Yes	No	No	No
No	Mal	60	165	71	80	No	No	No	No	Yes	No					Ⅲ		No	No	No	No	No	No	No	No		No	No	Yes	No	No	1.6	13.09	6.98	172	6.34	153	46.73	84.1	12	29.1	3.07	0.8	0.15	4.1	Yes	No	No	No
No	Mal	71	168	55	80	No	No	No	No	Yes	No					Ⅳ		No	No	No	No	No	No	No	No		No	No	No	No	No	1.04	7.73	6.24	386	3.89	86	46.43	63.7	11.4	25.2	2.13	1.1	0.18		No	No	No	No
No	Fem	75			60	No	Yes	No	Yes	Yes	No					Ⅲ		No	No	No	No	No	No	No	No		No	No	No	No	No	4	10.67	11.8	321	3.8	113	49.14	58.4	13.3	24.6	3.41	2	0.45	5.34	No	No	No	No
No	Fem	61	160	59	80	No	No	No	No	No	No							No	No	No	No	No	No	No	No		No	No	Yes	No	No	0.79	10.84	4.21	181	4.08	126	43.99	40	11.5	33	3.56	0.7	0.14		Yes	No	No	No
No	Mal	69			60	No	Yes	Yes	Yes	No	Yes							No	Yes	No	No	No	No	No	No		No	No	Yes	No	No	4.26	8.35	7.76	200	3.75	109	40.63	20.2	13.6	33.2	5.31	1.4	0.25		No	No	No	No
No	Mal	66	147	46	80	No	No	No	No	Yes	No							No	No	No	No	No	No	No	No		No	No	No	No	No	3779.2	>10000.00	6.77	136	3.81	116	36.46	59.3	10.8	26.9	3.56	6	1.53		Yes	No	No	No
No	Mal	82	169	63	80	No	Yes	No	No	Yes	No							Yes	Yes	Yes	No	Yes	No	No	No		No	No	No	No	No	1.26	22.12	8.48	134	3.87	117	37.65	73.1	14.5	31	4.83	1.6	0.18		No	No	No	No
No	Mal	53	173	65	90	No	No	No	No	No	No							No	No	No	No	No	No	No	No		No	No	No	No	No	2.54	8.64	10.72	295	5.36	160	46.24	80.5	9.8	28	3.02	0.6	0.16	5.42	Yes	No	No	No
No	Mal	70	156	55	80	No	No	No	No	Yes	Yes					Ⅲ		No	Yes	No	No	Yes	No	Yes	No		No	No	Yes	No	No	0.81	6.19	7	604	3.3	85	42.82	68.7	12.8	30.2	5	3.9	1.08		Yes	No	No	No
No	Mal	72	155	56	90	No	No	No	No	Yes	No					Ⅳ		No	No	No	No	No	No	No	No		No	No	No	No	No							34.01	74	12	35.7	5.82	8.9	2.51		No	No	No	No
No	Fem	61	155	55	90	No	No	No	No	No	No							No	No	No	No	No	No	No	No		No	No	No	No	No	1.09	9.33	5.21	152	4.32	131	46.44	51	10.6	26.5	2.51	0.9	0.14	4.38	Yes	No	No	No
No	Mal	49	168	69	80	No	No	No	No	Yes	No							No	No	No	No	No	No	No	No		Yes	No	No	No	No	31.78		4.71	133	3.95	117	35.17	84.7							No	No	No	No
No	Mal	48	167	75	80	No	No	No	No	Yes	No					Ⅲ		No	No	Yes	No	Yes	No	No	No		No	No	Yes	No	No	<0.50	8.17	6.93	351	3.55	113	42.92	71.9	11.3	27.1	3.02	1.3	0.35	3.32	Yes	No	No	No
No	Mal	65	170	55	80	No	No	No	No	Yes	No					Ⅳ		No	No	No	No	Yes	No	No	No		No	No	No	No	No	0.95	5.12	4.8	127	4.06	125	45.47	64.4	10.7	28.6	2.28	2.5	0.69	4.91	Yes	Yes	No	No
No	Mal	76			70	No	Yes	No	No	No	Yes							No	No	No	No	No	No	No	No		No	No	Yes	No	No	2.17	65.71	8.68	103	3.46	103	29.17	78.7	13.4	35.4	5.82	12.4	3.87	2.41	Yes	No	No	No
No	Fem	52	158	57	80	No	No	No	No	Yes	No					Ⅳ		Yes	No	Yes	No	No	No	No	No		Yes	No	Yes	No	No	<0.50	7.9	2.79	132	3.99	126	45.95	53.2	13.2	34.3	3.35	2.3	0.71		No	Yes	No	No
No	Fem	67	150	37	80	No	No	No	No	Yes	No					Ⅳ		No	No	No	No	No	No	No	No		Yes	No	No	No	No	50.55	131.89	5.36	190	4.14	120	43.19	48.6	13.1	33.8	4.67	7.7	2.26	0.71	Yes	Yes	No	No
No	Mal	51	160	57	80	No	No	No	No	No	No							No	No	No	No	No	No	No	No		No	No	No	No	No	1.28	8.5	7.21	400	4.01	114	46.75	57.2	11.4	28.7	4.13	5.7	1.32		No	No	No	No
No	Mal	68	155	55	90	No	No	No	No	Yes	No	4	2	0	T4N2M0	Ⅲ		No	No	Yes	No	No	No	No	No		Yes	No	No	No	No	1.38	<1.20	3.16	156	2.97	96	35.7	49.3	13.1	26.9	2.7	3.5	1.9		No	No	No	No
No	Mal	62	165	49	70	No	No	No	No	Yes	No							No	No	No	No	No	No	No	No		No	No	No	No	No	0.5	10.12	5.13	233	3.76	113	34.55	83.6	10.6	26.3	2.13	12.1	4.24		Yes	No	No	No
No	Mal	68	175	60	70	No	Yes	No	No	Yes	No							Yes	No	No	No	Yes	No	No	No		No	No	No	No	No	1.54	19.16	7	125	2.88	96	37.08	100.3	14.9	31	2.64	1.6	0.41	3.08	Yes	No	No	No
No	Mal	61	163	54	80	No	No	No	No	Yes	No					Ⅳ		No	No	No	No	Yes	No	No	No		Yes	No	Yes	No	No	1.32	13.03	5.75	151	4.85	147	45.36	95.6	11.7	30.3	2.58	2.8	0.8	5.57	Yes	Yes	No	No
No	Fem	68	162	72	80	No	Yes	No	No	Yes	Yes					Ⅲ		No	No	Yes	No	Yes	No	No	No		No	No	Yes	No	No	2.31	21.29	4.86	169	4.59	142	50.86	72.7	13.1	28.2	3.29	5	1.08	5.36	Yes	No	No	No
No	Fem	48	160	54	80	No	No	No	No	No	No							No	No	No	No	No	No	No	No		No	No	Yes	No	No	1.62	<1.20	4.65	184	4.33	73	46.85	55.2	13.6	36.4	1.86	0.3	0.11	3.01	Yes	No	No	No
No	Mal	79	170	59	70	No	Yes	No	No	No	No							No	No	No	No	No	No	Yes	No		No	No	Yes	No	No	3.76	1.15	11.52	185	5.03	154	49.1	150.4	14.2	26.9	3.61	10	2.84	5.01	No	No	No	No
No	Mal	51	173	68	80	No	No	No	No	Yes	Yes					Ⅱ		Yes	No	No	No	Yes	No	No	No		No	No	No	No	No	0.92	10.29	3.1	129	2.71	81									Yes	No	No	No
No	Mal	75	154	61.5	80	No	No	No	No	Yes	No					Ⅳ		No	No	No	No	No	No	No	No		Yes	No	No	No	No	17.54	3923.5	5.3	195	4.64	140	41.48	68.5	10.2	25.4	2.87	1.9	0.66	5.56	No	Yes	No	No
No	Mal	60	160	60	80	No	No	No	No	Yes	No					Ⅱ		No	No	Yes	No	No	No	No	No		Yes	No	No	No	No	1.52	3.21	3.24	189	6.22	126	42.67	58.6	11.1	31.3	3.23	0.6	0.12	4.9	Yes	No	No	No
No	Mal	50	170	60	80	No	No	No	No	Yes	No	2	0	0	T2N0M0	Ⅰ		No	No	No	No	No	No	Yes	No		No	No	No	No	No	2.76	10.06	3.68	136	4.13	140	47.2	46.3	12.2	25.7	2.03	0.5	0.06	3.11	No	No	No	No
No	Mal	53	157	49	70	No	No	No	No	Yes	No					Ⅳ		No	No	No	No	No	No	No	No		No	No	No	No	No	16.8		8.9	154	4.72	145	46.82	67.7	13.1	27.9	3.29	8	2.24		No	No	No	No
No	Mal	60	165	60	90	No	No	No	No	Yes	Yes					Ⅲ		Yes	Yes	No	No	Yes	No	Yes	No		No	No	Yes	No	No	1.96	10.56	5.25	168	3.16	97	38.02	86.7	13.3	31.4	2.28	0.8	0.17	4.91	Yes	No	No	No
No	Mal	67	164	56	80	No	No	No	No	Yes	No							No	No	No	No	Yes	No	No	No		Yes	No	No	No	No	1	21.77	8.59	179	3.49	112	44.29	64.6	12.5	33.6	3.91	1.2	0.3	3.76	No	Yes	No	No
No	Mal	72	175	80	80	No	No	No	No	Yes	Yes					Ⅱ		No	No	No	No	Yes	No	No	No		Yes	No	Yes	No	No	0.69	11.1	3.95	246	2.95	63	37.37	82.3	14.9	33.5	2.2	2	0.52	3.25	Yes	No	No	No
No	Mal	63	165	50	90	No	No	No	No	Yes	No							No	No	No	No	No	No	No	No		No	No	Yes	No	No	2.81	56.64	4.75	170	4.18	145	48.4	61.1	13.9	36.9	1.83	0.5	0.01	4.05	Yes	No	No	No
No	Mal	64	170	66	70	No	Yes	No	No	Yes	Yes					Ⅳ		No	No	No	No	No	No	Yes	No		No	No	Yes	No	No	4.15	109.12	3.51	97	4.63	135	37.31	82.1	12.2	32.6	2.66	0.9	0.25	3.15	Yes	No	No	No
No	Mal	65	160	63	80	No	No	No	No	Yes	No							No	No	No	No	No	No	No	No		No	No	No	No	No	27.97	4.33	6.43	161	4.32	144	45.22	94.4	12.3	26.6	2.21	0.3	0.1		Yes	No	No	No
No	Mal	78	170	62	70	No	Yes	No	No	Yes	No					Ⅳ		No	No	No	No	Yes	No	No	No		No	No	No	No	No	>100.00	23.91	5.99	247	2.52	80	31.35	58.2	12.1	25.3	3.09	11.8	3.47		No	No	No	No
No	Mal	62	167	51	70	No	No	No	No	Yes	No							No	No	Yes	No	Yes	No	No	No		No	No	No	No	No	1.77	8.51	3.74	155	3.89	121	38.92	53.7	12.7	27.9	3.42	0.8	0.21		No	No	No	No
No	Mal	50	162	66	90	No	No	No	No	Yes	Yes					Ⅲ		No	Yes	No	No	No	No	No	No		No	No	Yes	No	No	2.78	15.85	6.7	195	4.33	138	45.36	66.4	12	35.6	1.59	0.5	0.11	5.03	Yes	No	No	No
No	Mal	70	170	64	80	No	No	No	No	Yes	No					Ⅲ		No	No	No	No	No	No	No	No		No	No	No	No	No	2.42	48.67	3.85	291	3.28	78	28.3	68.3	12.9	37	4.79	6.1	1.54	4.32	No	No	No	No
No	Fem	88	150	49	80	No	No	No	No	No	No							No	No	No	No	No	No	No	No		No	No	No	No	No	<0.50	480.87	30	117	3.45	107	39.84	77.2	13.1	26.4	2.24	6.7	1.86	3.66	Yes	No	No	No
No	Mal	60	166	63	80	No	Yes	No	No	Yes	Yes							No	No	No	No	Yes	No	No	No		No	No	Yes	No	No	12.31	10.29	5.41	284	4.19	80	39.07	101.6	12.3	32.3	2.22	1.4	0.33		Yes	No	No	No
No	Mal	60	160	62.5	90	No	No	No	No	Yes	Yes							No	No	No	No	Yes	No	No	No		No	No	No	No	No	2.25	17.9	5.89	273	4.62	142	46.99	56.6	9.9	25.6	3.63	1.8	0.51	4.5	Yes	No	No	No
No	Fem	66	150	45	60	No	Yes	No	Yes	Yes	Yes					Ⅳ		Yes	Yes	No	No	Yes	No	No	No		Yes	No	No	No	No	433.6	9.12	7.54	325	2.84	67	31.74	65.6	12.3	29.6	2.35	2.6	0.76		No	Yes	No	No
No	Mal	67	157	50	80	No	No	No	No	Yes	Yes					Ⅱ		No	No	No	No	No	No	No	No		No	No	Yes	No	No	2.16	8.6	5.27	221	3.74	124	41.6	59.9	13.1	28.4	3.68	1.1	0.24	4.63	Yes	No	No	No
No	Mal	54	167	50	60	No	No	No	No	Yes	No					Ⅳ		No	Yes	No	No	Yes	No	No	No		Yes	No	No	No	No	27.25	19691	6.27	111	2.6	84	34.62	130.1	16	36.3	1.42	42.8	9.13		No	Yes	No	No
No	Mal	62			50	No	No	No	No	Yes	No					Ⅳ		No	No	No	No	No	No	No	No		No	No	No	No	No	1663	1902	8.1	354	3.21	93	30.27	198	14.3	34.8	3.75	7.9	2.19	3.01	No	No	No	No
No	Mal		190	84	80	No	Yes	No	No	Yes	Yes							Yes	No	No	No	Yes	No	No	No		No	No	No	No	No	11.1	>1000.00	4.51	146	3.81	110	36.78	228.2	11.8	31	3.07	71.9	>10.00	4.49	Yes	No	No	No
No	Mal	49	158	65	70	No	No	No	No	No	Yes					Ⅲ		No	No	No	No	Yes	No	No	No		No	No	Yes	No	No	7.54	7.26	5	411	3.42	90	42.19	145.6	12	26.5	3.71	5	1.2	4.35	Yes	No	No	No
No	Mal	67	160	52	70	No	No	No	No	Yes	No							No	No	No	No	No	No	No	No		No	No	No	No	No	3.21	5773.1	7.12	301	3.33	64	30.21	70.5	12.6	28.3	3.56	6.8	2.21		No	No	No	No
No	Mal	53	160	59	70	No	No	No	No	Yes	No					Ⅳ		No	No	No	No	No	No	No	No		No	No	No	No	No	1.39	7.98	14.01	352	4.57	128	31.93	57.1	16.2	32	5.18	13.9	3.65		No	No	No	No
No	Mal	64	160	50	80	No	No	No	No	Yes	No					Ⅲ		No	No	No	No	No	No	No	No		No	No	No	No	No	1.54	14.56	7.41	196	4.66	155	49.34	74.1	13	31.4	3.86	2.3	0.79		Yes	Yes	No	No
No	Mal	62	160	58	90	No	No	No	No	Yes	Yes					Ⅰ		No	No	No	No	No	No	No	No		No	No	Yes	No	No	1.7	7.69	4.5	136	4.15	142	39.47	65.1	12.8	30	2.75	0.24	0.09	4.74	Yes	No	No	No
No	Mal	72	155	48	80	No	No	No	No	Yes	No					Ⅱ		No	No	Yes	No	No	No	No	No		No	No	Yes	No	No			3.63	223	3.88	115	45.64	82.5	11.3	29.1	3.63	4.9	1.16	6.26	No	Yes	No	No
No	Mal	54	157	51	80	No	No	No	No	Yes	Yes					Ⅱ		No	No	Yes	No	Yes	No	No	No		No	No	Yes	No	No	2.2	18.02	9.93	220	4.53	142	42.73	72.1	12.8	31.2	3.29	1.1	0.29		Yes	No	No	No
No	Mal	59	180	74	80	No	Yes	No	No	No	No							No	No	Yes	No	Yes	No	No	No		No	No	No	No	No	2.4	6.04	6.61	105	5.56	171	52.36	78.8	10.2	25.7	3.42	0.5	0.12	4.76	Yes	No	No	No
No	Mal	73	158	54	90	No	No	No	No	Yes	No					Ⅳ		No	No	Yes	No	No	No	No	No		Yes	No	Yes	No	No	2.25		8.66	289	4.32	128	35.56	72.3	11.4	30.2	5.5	6.1	1.65	4.39	Yes	No	No	No
No	Mal	70	166	65	30	No	No	No	No	No	Yes							Yes	No	No	No	Yes	No	No	No		No	No	Yes	No	No	1.9	17.5	5.91	101	1.88	45	31.98	65.6	16.3	28.2	3.03	5.4	1.17	2.66	No	No	No	No
No	Mal	44	165	60	90	No	No	No	No	Yes	Yes					Ⅰ		No	No	No	No	No	No	No	No		No	No	Yes	No	No	0.75	29.49	8.81	197	5.32	161	48.28	84.7	12	28.6	3.08	0.5	0.34		Yes	No	No	No
No	Mal	68	173	73	70	No	Yes	No	Yes	Yes	No					Ⅳ		No	No	No	No	No	No	No	No		No	No	No	No	No	1.01	83.19	5.01	147	3.62	92	34.35	156.7	13.1	36.7	3.12	5.6	1.72		No	No	No	No
No	Mal	53	161	56	90	No	Yes	No	No	Yes	No					Ⅲ		No	No	No	No	No	No	No	No		No	No	No	No	No	2.71	8.5	9.44	363	4.17	96	36.99	50.2	11	30.7	4.24	1.3	0.4		Yes	No	No	No
No	Mal	75	165	80	70	No	Yes	No	No	Yes	No	4	3	X	T4N3MX			No	No	No	No	No	No	No	No		No	No	No	No	No	4.24		7.01	322	4.14	123	36.11	68.8	12.6	29.4	4.23	6.5	1.27	5.38	No	No	No	No
No	Mal	72	153	53	70	No	No	No	No	Yes	Yes							Yes	No	No	No	Yes	No	No	No		No	No	No	No	No	2	7.39	9.69	503	2.33	45	32.44	103.9	13.3	24.3	4.1	5.3	1.28		Yes	No	No	No
No	Mal	62	167	69	60	No	No	No	No	Yes	Yes					Ⅳ		Yes	No	No	No	Yes	No	No	No		No	No	No	No	No	747.92	2.8	6.95	276	3.17	59	24.45	66.2	12.3	30.8	2.13	22.2	>10.00		No	No	No	No
No	Fem	43			30	No	No	No	No	Yes	Yes					Ⅳ		No	No	No	No	Yes	No	Yes	No		No	No	No	No	No	223	8525	11.92	45	2.31	63	33.21	108.9	17.5	36.9	2.47	62.2	>10.00	3.58	No	No	No	No
No	Mal	69	163	56	80	No	No	No	No	Yes	No					Ⅲ		No	No	Yes	No	No	No	No	No		Yes	No	Yes	No	No	1.55	101.9	6.18	178	4.68	151	42.72	66.7	11.4	29	4.64	1.8	0.49		Yes	No	No	No
No	Fem	53	158	64	80	No	Yes	No	No	Yes	No							No	No	No	No	No	No	No	No		No	No	No	No	No	1.67	11.9	6.79	272	4.65	145	50.08	53.1	12.4	26	2.58	0.3	0.21		Yes	No	No	No
No	Mal	67	161	55	80	No	No	No	No	No	No							No	No	No	No	No	No	No	No		No	No	Yes	No	No	1.86	16.64	7.96	233	4.52	136	44.62	58.7	11	33.1	3.71	0.5	0.1	4.15	No	No	No	No
No	Mal	59	170	60	80	No	No	No	No	No	No							No	No	No	No	No	No	No	No		No	No	Yes	No	No	2.13	12.64	5.33	247	3.97	103	35.76	58.6	10.8	39.3	2.78	1.3	0.42		No	No	No	No
No	Mal	75	155	62	70	No	No	No	No	Yes	Yes					Ⅱ		No	No	No	No	No	No	No	No		No	No	Yes	No	No	2.06	1.96	5.16	113	4.12	131	45.2	68.3	12.4	28.1	2.88	1	0.3	4.32	Yes	No	No	No
No	Mal	73	153	48	80	No	Yes	No	No	Yes	Yes					Ⅲ		No	No	No	No	No	No	No	No		No	No	Yes	No	No			5.6	298	3.93	120	44.96	69.2	10.6	28.7	3.71	1.9	0.53	5.07	Yes	No	No	No
No	Mal	74	150	38	70	No	No	No	No	Yes	No							No	No	No	No	No	No	No	No		Yes	No	No	No	No	1.3	9.66	4.4	141	4.84	142	39.08	74.5	11.6	32.1	3.23	0.6	0.2		No	Yes	No	No
No	Mal	76	164	65	70	No	Yes	No	No	Yes	Yes					Ⅰ		No	Yes	No	No	Yes	Yes	No	No		No	No	Yes	No	No	2.01	14.15	5.88	239	3.95	133	46.08	78.6	10.5	27.5	2.92	0.6	0.14		Yes	No	No	No
No	Mal	51	165	55	90	No	No	No	No	Yes	No					Ⅳ		No	No	Yes	No	No	No	No	No		Yes	No	No	No	No	4.78	80.79	5.45	155	4.52	136	42.9	74.4	10.7	36.2	2.62	0.5	0.14		No	No	No	No
Yes	Fem	76	159	60	70	No	No	No	No	Yes	No					Ⅳ		No	No	No	No	Yes	No	No	No		Yes	No	No	No	No	4.37	53.5	4.53	247	3.62	99	39.46	105	16.6	30.8	3.23	7	1.89		No	Yes	No	No
No	Mal	63	158	50	80	No	No	No	No	Yes	Yes					Ⅲ		No	No	No	No	Yes	No	No	No		No	No	No	No	No	1.09	4.26	3.93	311	2.75	52	41.95	80.8	12.6	36.6	3.51	3.1	0.86	4.44	Yes	No	No	No
No	Mal	50	165	64	80	No	Yes	No	Yes	Yes	No					Ⅲ		No	No	Yes	No	No	No	No	No		Yes	No	No	No	No	4	9.27	3.78	82	5.68	110	49.01	69.2	13	37.2	3.02	1.7	0.54	4.19	No	No	No	No
No	Mal	88			60	No	No	No	No	Yes	Yes					Ⅳ		Yes	Yes	No	No	Yes	No	No	No		No	No	No	No	No	2.68	377.6	7.87	183	2.46	64	25.43	87.9	14.3	32.8	2.58	22.7	9.55		No	No	No	No
No	Fem	64	150	78	80	No	Yes	No	No	No	No							No	No	No	No	No	No	No	No		No	No	Yes	No	No	1.25	8.52	6.05	146	4.39	143	48.24	59.4	11.1	27.2	2.78	1.4	0.57	5.56	Yes	No	No	No
No	Fem	62	155	65	70	No	No	No	No	Yes	No					Ⅳ		Yes	Yes	No	No	Yes	No	Yes	No		Yes	No	Yes	No	No	0.92	21.28	4.35	160	3.91	120	37.56	53.9	13.7	29.4	3.2	6.7	1.88	2.07	Yes	No	No	No
No	Fem	68	155	52	80	No	No	No	No	Yes	Yes					Ⅱ		No	No	Yes	No	Yes	No	Yes	No		No	No	Yes	No	No	<0.50	12.46	17.98	327	4.32	124	40.98	41	15	21.1	2.33	6.7	1.98		Yes	No	No	No
No	Mal	52	167	80	80	No	No	No	No	Yes	No					Ⅱ		No	Yes	No	No	No	No	No	No		No	No	No	No	No	3.18	19.86	8.12	193	4.86	159	47.51	78.4	13.9	35.2	3.03	3.1	0.77		No	No	No	No
Yes	Fem	64			70	No	Yes	No	No	Yes	Yes							No	No	No	No	No	No	No	No		No	No	Yes	No	No	0.55	6.25	7.75	444	4.58	154	41.51	90.8	13.4	24.3	4.51	9.4	2.44	3.59	Yes	No	No	No
No	Fem	35	153	45	80	No	No	No	No	Yes	No							No	No	No	No	No	No	No	No		No	No	No	No	No	2.4	30.94	3.89	241	3.81	109	45.66	44.7							No	No	No	No
No	Mal	75	165	60	80	No	No	No	No	Yes	No					Ⅲ		No	No	No	No	No	No	No	No		No	No	No	No	No	2.82	31.08	5.24	207	4.98	154	45.36	80.1	13.7	26.4	3.08	0.8	0.15		No	No	No	No
No	Mal	69	152	41.5	70	No	No	No	No	Yes	No					Ⅲ		No	No	No	No	Yes	No	No	No		No	No	No	No	No	1.92	7.59	3.7	235	3.63	84	33.96	75.7	11.6	32.3	3.29	3	0.89	4.08	No	No	No	No
No	Mal	73	165	62	70	No	Yes	No	No	Yes	No					Ⅳ		Yes	No	No	No	Yes	No	No	No		No	No	No	No	No	32.57	8636	7.13	189	4.6	142	44.03	93.1	13.4	38.5	3.71	5.7	1.45	5.45	No	No	No	No
No	Mal	55	166	59	80	No	No	No	No	Yes	No					Ⅲ		No	No	No	No	Yes	No	No	No		Yes	No	Yes	No	No	0.52	12.4	3.67	129	4.02	112	43.82	87.4	14.4	29.8	1.84	11.7	2.34	2.78	No	No	No	No
No	Mal	47	163	70	80	No	No	No	No	Yes	No					Ⅳ		No	No	No	No	No	No	No	No		No	No	No	No	No	1.31	6.18	7.24	324	4.99	148	40.31	52.3	10.6	27.3	4.64	6.1	1.84		Yes	No	No	No
No	Fem	67	136	39	90	No	No	No	No	Yes	No					Ⅳ		No	No	No	No	No	No	No	No		No	No	No	No	No			7.91	499	3.71	72	32.23	41.1	13.4	37.9	3.98	3.4	0.9	5.32	No	No	No	No
No	Mal	75	174	72	70	No	Yes	No	No	Yes	No					Ⅳ		Yes	No	No	No	No	No	No	No		Yes	No	Yes	No	No	9.67	5677	4.58	189	4.75	144	47.15	72	12.2	28.7	3.02	13.4	4.71	4.23	No	Yes	No	No
No	Mal	52	162	42	70	No	No	No	No	No	Yes							No	No	No	No	Yes	No	No	No		No	No	No	No	No	0.58	17.79	2.9	204	4.67	100	36	56.7	14.2	31.8	1.92	1.2	0.25		Yes	No	No	No
No	Mal	58	158	51	90	No	No	No	No	No	Yes					Ⅲ		No	No	No	No	Yes	No	No	No		No	No	No	No	No	0.82	4.7	13.15	435	2.65	53	23.55	64	14.5	30.4	3.51	11.1	2.94	2.87	No	No	No	No
No	Fem	55	160	62	80	No	No	No	No	Yes	Yes					Ⅰ		No	No	No	No	No	No	No	No		Yes	No	Yes	No	No	0.79	7.4	4	119	3.16	100	43.23	57.3	10.8	25.4	2.1	0.8	0.21		Yes	No	No	No
No	Mal	51	161	46	60	No	No	No	No	Yes	No					Ⅳ		Yes	No	Yes	No	No	No	Yes	No		Yes	No	Yes	No	No	46.16	113.76	1.87	114	3.55	117	34.58	77	13.4	27	3.23	8	2.24	2.09	Yes	No	No	No
No	Mal	78	170	66	70	No	No	No	No	Yes	Yes							No	No	No	No	No	No	No	No		No	No	No	No	No	<0.50	10.24	8.05	328	2.33	69	35.95	82.8	12.5	31.2	3.18	1.8	0.69		Yes	No	No	No
No	Fem	46	152	60	80	No	No	No	No	Yes	Yes							No	No	No	No	Yes	No	No	No		Yes	No	Yes	No	No	<0.50	18.48	4.97	228	4.14	103	47.41	50	11.5	31.4	3.02	0.9	0.33	4.13	Yes	No	No	No
No	Mal	87	171	64	90	No	No	No	No	No	No							Yes	Yes	No	No	Yes	No	Yes	No		No	No	Yes	No	No	3.8	30.5	5.83	111	4.55	142	43.75	72.4	11.8	33.5	3.36	0.8	0.17	4.25	Yes	No	No	No
No	Mal	63	162	53.5	80	No	Yes	No	No	Yes	Yes					Ⅲ		No	No	No	No	Yes	No	No	No		Yes	No	Yes	No	No			4.48	161	4.3	108	37.24	87	12.1	30.7	3.12	1.9	0.45		Yes	No	No	No
No	Mal	52	1.68	70	80	No	Yes	No	No	No	Yes					Ⅲ		No	No	No	No	Yes	No	No	No		No	No	Yes	No	No	1.87	23.2	8.86	196	4.49	136	44.72	70	10.1	30.3	3.42	1.2	0.37		Yes	No	No	No
No	Mal	54	163	60	80	No	No	No	No	Yes	No					Ⅳ		No	Yes	No	No	Yes	No	No	No		No	No	No	No	No	4.23	28.65	4.99	229	3.21	108	39.86	69	11.1	31.1	1.79	1.7	0.53		No	No	No	No
No	Fem	49	157	45	80	No	No	No	No	No	No					Ⅲ		No	No	No	No	No	No	No	No		No	No	No	No	No	<0.50	104.46	12.15	18	3.71	89	23.74	44.3	17.2	41.3	3.41	10.4	3.2		No	No	No	No
No	Mal	58	168	50	70	No	No	No	No	Yes	No					Ⅳ		No	No	No	No	No	No	No	No		No	No	No	No	No	1.93	32.92	5.82	112	3.89	114	35.71	43	11.3	30.2	3.36	0.5	0.19		No	No	No	No
No	Mal	76	163	56	70	No	Yes	No	No	Yes	No							No	No	No	No	No	No	No	No		No	No	No	No	No	0.71	12.63	7.21	140	4.52	143	43.78	93.3	12.4	28.4	2.4	8.2	2.31	4.04	Yes	No	No	No
No	Mal	61	156	64.5	80	No	No	No	No	No	No					Ⅲ		No	No	No	No	No	No	No	No		Yes	No	No	No	No	<0.50	15.73	8.66	339	3.9	91	37.53	73.1	12.7	34.2	3.08	0.6	0.15		Yes	No	No	No
No	Mal	47	168	66	70	No	No	No	No	Yes	No							No	Yes	No	No	No	No	No	No		No	No	No	No	No	1.8	6.86	5.4	196	4.07	123	42.16	57.5	13.9	32.5	2.93	5.1	1.24		No	No	No	No
No	Mal	67	160	49	70	No	No	No	No	Yes	No					Ⅳ		No	Yes	No	No	No	No	No	No		Yes	No	No	No	No	4.64	17.35	8.88	421	4.9	145	33.88	66.1	11.9	37.1	3.18	3	0.98		No	No	No	No
No	Mal	76	165	57	80	No	No	No	No	Yes	No					Ⅲ		No	No	No	No	No	No	No	No		No	No	No	No	No	51.74	21.77	5.01	143	4.39	129	47.99	87.7	11.4	26.3	2.13	11.7	5.35	3.58	Yes	No	No	No
No	Mal	61	170	57	80	No	Yes	No	No	Yes	Yes					Ⅲ		No	No	No	No	No	No	Yes	No		No	No	Yes	No	No	2.06	12.4	5.4	137	3.98	132	38.97	68.9	11	29.4	2.54	1.4	0.46	2.76	Yes	No	No	No
No	Mal	65	164	50	80	No	No	No	No	Yes	No					Ⅳ		Yes	No	No	No	No	No	No	No		No	No	No	No	No	1.87	6.02	6.43	221	2.25	75	38.23	112.5	14.8	29	5.37	4.2	1.01	2.97	Yes	No	No	No
No	Mal	64	171	70	80	No	Yes	No	Yes	Yes	Yes					Ⅳ		No	No	No	No	No	No	Yes	No		No	No	Yes	No	No			6.05	105	3.67	124	45.99	102.1	13.7	31.4	3.86	2.6	0.73		Yes	No	No	No
No	Mal	77	170	54	80	No	Yes	No	No	Yes	No					Ⅳ		No	No	No	No	Yes	No	No	No		No	No	No	No	No	2.48	13.3	3.77	227	3.17	96	43.73	61.8	10.9	31.2	3.12	2.4	0.95	3.27	No	Yes	No	No
No	Fem	40	162	56.5	70	No	No	No	No	Yes	No					Ⅳ		No	No	No	No	Yes	No	No	No		Yes	No	Yes	No	No	2.98	360	6.35	435	3.77	92	42.3	48.4	10.7	29.8	3.56	4.6	1.67		Yes	No	No	No
No	Fem	47	155	48	90	No	No	No	No	No	No							No	No	No	No	No	No	No	No		No	No	Yes	No	No	<0.50	22.11	3.74	380	4.7	150	51.26	51.8	10.1	25.3	3.02	1	0.34	4.87	Yes	No	No	No
No	Mal	68	162	64	80	No	No	No	No	Yes	No					Ⅲ		No	No	No	No	No	No	No	No		No	No	No	No	No	9.88	273.19	5.16	252	3.18	81	40.71	92.2	11.9	32.6	6.17	2.9	1	2.88	No	No	No	No
No	Mal	56	166	55	80	No	No	No	No	No	No					Ⅲ		No	No	No	No	No	No	No	No		No	No	No	No	No			4.56	156	4.54	119	47.94	59.6	12.4	31.7	2.88	0.5	0.19		Yes	No	No	No
No	Mal	58	165	47	80	No	No	No	No	Yes	Yes					Ⅲ		No	No	No	No	No	No	No	No		No	No	Yes	No	No	1.99	81.28	8.42	438	3.54	76	40.51	73	11.5	35.8	4.13	0.5	0.24	2.83	Yes	No	No	No
Yes	Fem	83	145	45	60	No	No	No	No	Yes	No							No	No	No	No	No	No	No	No		No	No	Yes	No	No	2.73	13.77	8	120	2.11	82	37.24	58.4	13	36.6	2.22	6.4	2.2		No	No	No	No
No	Mal	67	160	48	70	No	No	No	No	Yes	No					Ⅱ		No	No	No	No	No	No	No	No		No	No	No	No	No															No	No	No	No
No	Mal	73	155	48	80	No	Yes	No	No	Yes	No							No	No	No	No	No	No	No	No		No	No	No	No	No	<0.50	16.08	5.28	212	3.83	118	38.62	71	13.6	27.5	3.02	2.6	0.76	4.55	Yes	No	No	No
No	Mal	65	170	56	80	No	No	No	No	Yes	No					Ⅲ		No	Yes	No	No	No	No	No	No		Yes	No	No	No	No	32.52	11.37	6.16	260	4.39	134	46.85	83.6	12.1	23.8	2.51	2.2	0.83	3.7	No	Yes	No	No
No	Mal	57	168	65	90	No	No	No	No	Yes	Yes					Ⅱ		No	No	No	No	No	No	No	No		No	No	Yes	No	No	2.51	31.91	6.91	199	4.67	141	49.89	62.8	10.1	30.2	2.82	0.5	0.11	5.03	Yes	No	No	No
No	Fem	42	157	54	80	No	No	No	No	Yes	No							No	No	No	No	No	No	No	No		Yes	No	No	No	No	1.42	10.18	10.71	286	4.43	124	42.36	42.8	12.2	26.6	4.46	3.2	1.18		Yes	No	No	No
No	Fem	74	150	49	80	No	No	No	No	Yes	Yes					Ⅲ		No	No	No	No	No	No	No	No		Yes	No	No	No	No	2.67	19.53	12.6	322	3.98	114	44.3	56.7	13.1	37.5	3.5	0.7	0.32		No	No	No	No
No	Fem	53	157	56	70	No	No	No	No	Yes	No					Ⅳ		No	No	No	No	No	No	No	No		No	No	No	No	No	160.7	582.01						44.5	11.4	30	3.36	5.2	2.42	3.26	No	Yes	No	No
No	Mal	70	160	69	70	No	Yes	No	No	Yes	No							No	No	No	No	No	No	No	No		No	No	Yes	No	No	2.01	21.19	5.59	204	3.91	125	38.29	72	11.6	38.4	3.12	0.6	0.29		No	No	No	No
No	Fem	60	162	53	70	No	No	No	No	Yes	No					Ⅲ		No	No	Yes	No	No	No	No	No		Yes	No	Yes	No	No	<0.50	9.04	4.98	213	3.68	103	37.04	69	12.9	31	2.62	0.7	0.28	3.04	Yes	No	No	No
No	Mal	69	165	76.5	80	No	Yes	No	Yes	Yes	No					Ⅱ		No	No	No	No	No	No	No	No		No	No	Yes	No	No	<0.50	9.58	3.51	171	5.23	146	44.62	56.6	12.7	35.4	2.2	0.8	0.13	3.85	Yes	No	No	No
No	Mal	71			70	No	Yes	No	Yes	Yes	No	X	1	1	TXN1M1	Ⅳ	[TxN1M1IV期]	No	Yes	No	No	Yes	No	No	No		No	No	No	No	No	1.84	381.93	4.22	382	3.41	94	37.31	64.7	12.3	26	3.86	16.2	6.09	3.77	No	No	No	No
No	Fem	67	141	45	80	No	No	No	No	No	No							No	No	No	No	No	No	No	No		No	No	No	No	No	1.04	8.69	6.42	308	3.92	117	40.44	51	10.8	29.6	2.74	2.9	1.05	4.13	No	No	No	No
No	Fem	64	158	57	80	No	No	No	No	Yes	Yes					Ⅲ		No	No	No	No	No	No	No	No		No	No	Yes	No	No	<0.50	12.45	8.22	417	3.36	101	40.3	79.7	11.2	26.4	3.71	3	1.06		Yes	No	No	No
No	Fem	61	1.55	63	80	No	No	No	No	Yes	No							No	No	No	No	No	No	No	No		No	No	Yes	No	No			4.13	178	3.97	127	47.52	88.6	11.2	30.4	2.97	0.8	0.45	3.96	Yes	No	No	No
No	Mal	57	170	60.5	80	No	No	No	No	Yes	No					Ⅳ		No	No	No	No	No	No	No	No		No	No	No	No	No	1.66	16.69	5.84	211	4.58	141	43.9	79	12.4	30.3	2.63	0.2	0.15		No	No	No	No
No	Fem	31	155	51	70	No	No	No	No	Yes	No					Ⅳ		No	No	Yes	No	Yes	No	No	No		Yes	No	Yes	No	No	1.65	15.02	2.33	160	3.66	107	44.92	43	11.8	26.6	2.32	1.1	0.35	1.94	No	Yes	No	No
No	Mal	75	171	72	80	No	No	Yes	No	Yes	No					Ⅳ		No	No	No	No	No	No	No	No		Yes	No	Yes	No	No	2.03	7.25	5.48	131	4.36	128	41.72	75	11.4	32.4	4.37	0.7	0.29		Yes	Yes	No	No
No	Mal	53	160	45	80	No	No	No	No	Yes	No					Ⅲ		No	No	Yes	No	No	No	Yes	No		Yes	No	Yes	No	No	2.93	112.48	3.5	95	3.38	96	36.57	82.9	13.1	36.7	2.19	1.9	0.66		Yes	Yes	No	No
No	Mal	71	174	67	80	No	No	No	No	Yes	Yes					Ⅳ		No	No	No	No	No	No	No	No		No	No	Yes	No	No	3.7	10.1	2.37	79	4	90	34.49	90	11.9	35	1.81	2.5	0.6	3.27	Yes	No	No	No
No	Mal	69	157	55.5	90	No	No	No	No	Yes	No					Ⅳ		No	No	No	No	No	No	No	No		Yes	No	Yes	No	No			5.67	135	3.34	112	35.18	55	11	29.2	4.2	2.4	0.61	4.59	Yes	Yes	No	No
No	Mal	53			70	No	No	No	No	Yes	No					Ⅳ		No	Yes	Yes	No	No	No	Yes	No		No	No	Yes	No	No	1.72	60.75	10.9	57	3.33	105	30.84	72.5	16.7	36	2.29	40.4	>5.00	3.2	No	No	No	No
No	Mal	49	171	74	80	No	No	No	No	Yes	Yes					Ⅱ		No	Yes	Yes	No	Yes	No	No	No		Yes	No	Yes	No	No	<0.50	5.75	7.41	179	4.55	138	47.5	81.5	10.2	25.1	2.52	0.3	0.1	3.92	Yes	No	No	No
No	Fem	53	150	40	40	No	No	No	No	Yes	No					Ⅳ		No	Yes	No	No	No	No	No	No		No	No	Yes	No	No	4.22	208.76	10.66	307	3.66	103	37.35	41.1	11.3	28.7	3.62	6.6	3.23	3.36	No	No	No	No
No	Mal	73	164	53	80	No	No	No	No	Yes	Yes					Ⅲ		No	No	Yes	No	Yes	No	No	No		No	No	Yes	No	No	0.99	10.02	4.37	120	3.32	73	38.86	74.7	14.1	31.8	2.58	1.4	0.52	3.72	Yes	No	No	No
No	Mal	53	160	66	90	No	No	No	No	Yes	Yes					Ⅲ		No	No	No	No	No	No	No	No		Yes	No	Yes	No	No	0.93	20.69	5.23	172	5.21	157	49.31	140.4	12.3	25.5	2.89	0	0.18	5.18	Yes	No	No	No
No	Fem	59	160	51	80	No	No	No	No	Yes	Yes					Ⅰ		No	Yes	Yes	No	Yes	No	No	No		Yes	No	Yes	No	No	1.51	31.94	5.33	167	4.71	146	50.79	57	12.9	24.6	1.36	0.8	0.15		Yes	No	No	No
No	Mal	69	165	69	70	No	No	No	No	Yes	No							No	No	No	No	No	No	No	No		No	No	No	No	No	47.33	8.35	11.39	153	4.64	142	42.42	77.5	12.4	28.2	4.46	2.1	0.62	3.89	Yes	No	No	No
No	Mal	72	166	60	80	No	No	No	No	Yes	No							No	No	No	No	No	No	No	No		No	No	Yes	No	No			8.76	248	4.47	131	43.3	95.1	9.5	25.4	3.25	0.5	0.2	5.94	Yes	No	No	No
No	Mal	51	159	59.5	80	No	No	No	Yes	Yes	Yes					Ⅲ		No	No	No	No	No	No	No	No		No	No	Yes	No	No	2.54	32.68	4.52	185	4.44	142	41.56	64.4	10.2	20.8	3.55	0.9	0.23		Yes	No	No	No
No	Fem	68	150	57	70	No	Yes	No	No	Yes	Yes					Ⅳ		No	No	No	No	Yes	No	No	No		No	No	Yes	No	No	1.64	56.22	5.34	235	2.1	48	27.75	42.2	13.1	24.1	2.93	24.6	8.21		Yes	No	No	No
No	Mal	71	161	45	70	No	No	No	No	Yes	No					Ⅳ		No	No	Yes	No	No	No	No	No		Yes	No	Yes	No	No	515.4	16.77	6.04	179	4.18	104	42.68	58.3	11.2	27	3.76	2.6	0.76	4.59	No	Yes	No	No
No	Mal	76	162	54	70	No	Yes	No	No	No	No					Ⅰ		No	Yes	No	No	Yes	No	No	No		No	No	No	No	No	1.39	7.77	4.96	255	2.52	81	40.42	76	14.2	27.3	4.32	2.9	0.94	3.77	No	No	No	No
No	Mal	65	153	42	80	No	No	No	No	Yes	No					Ⅳ		No	No	No	No	Yes	No	No	No		No	No	No	No	No	2.26	11.5	6.22	271	3.64	115	36.55	67	10.3	33.7	4.07	2.4	0.66		No	No	No	No
No	Mal	62	167	46	60	No	No	Yes	No	Yes	No					Ⅳ		No	No	Yes	No	No	No	Yes	No		No	No	No	No	No	>100.00	6.7	7.71	65	2.17	72	38.68	51.8	>180.00	>240.00	0.29	34.1	>10.00		No	No	No	No
No	Mal	63	158	52	80	No	No	No	No	No	No					Ⅲ		No	No	No	No	No	Yes	No	No		No	No	No	No	No	5.97	23.16	4.81	182	4.03	124	46.71	78.3	10.3	29	2.93	0.5	0.23	4	No	Yes	No	No
No	Mal	74	155	52	80	No	No	No	No	Yes	No					Ⅳ		No	No	No	No	Yes	No	No	No		Yes	No	No	No	No	14.27	47.94	7.15	249	3.94	78	35.58	73.1	12.2	30.5	3.69	39.2	>10.00	2.85	No	Yes	No	No
No	Mal	68	168	66.5	80	No	No	No	No	No	Yes					Ⅲ		No	No	No	No	No	No	No	No		No	No	No	No	No	1.69	13.32	4.85	124	3.16	93	48.63	68.5	13.3	27.6	2.32	11.1	3.56	3.25	Yes	No	No	No
No	Fem	38	163	55	70	No	No	No	No	Yes	No					Ⅳ		No	No	No	No	No	No	No	No		Yes	No	Yes	No	No	1.5	118.2	5	229	3.46	96	42.49	43.7	13.4	26.8	2.66	10.6	3.39	2.77	Yes	Yes	No	No
No	Mal	72	158	60	80	No	No	No	No	Yes	Yes					Ⅰ		No	No	No	No	Yes	No	No	No		No	No	Yes	No	No	1.48	10.51	5.82	161	4.16	138	46.21	64.6	12.8	24.7	3.36	0.3	0.2		Yes	No	No	No
No	Mal	72	158	59	90	No	No	No	No	Yes	Yes					Ⅱ		No	No	No	No	Yes	No	Yes	No		No	No	Yes	No	No	3.26	25.91	4.81	168	3.87	122	43.49	90.9	11.6	29.2	2.84	1.2	0.13	3.69	Yes	No	No	No
No	Fem	49	159	57	80	No	No	No	No	Yes	No					Ⅳ		No	No	Yes	No	Yes	No	No	No		Yes	No	No	No	No	39.95	19.87	11.49	370	2.9	80	34.46	56	13.3	31.9	4.94	30.9	>10.00		Yes	No	No	No
No	Mal	48	154	52	90	No	No	No	No	Yes	Yes					Ⅱ		No	No	No	No	No	No	Yes	No		Yes	No	Yes	No	No	2.12	20.32	6.67	239	4.65	140	45.42	59.7	12.4	29.8	2.51	0.5	0.22		Yes	No	No	No
No	Fem	45	154	46.5	90	No	No	No	No	Yes	No	4	1	1	T4N1M1	Ⅳ	[T4aN1bM1IV期]	No	No	Yes	No	No	No	No	No		No	No	Yes	No	No	2.67	5.42	5.7	136	4.17	123	45.2	51.3	10.8	27.4	3.42	0.9	0.15	3.97	No	Yes	No	No
No	Mal	67	163	51	70	No	No	No	No	No	No					Ⅳ		No	No	No	No	No	No	No	No		No	No	No	No	No	178.3	663.56	3	76	3.57	120	34.87	102.3	13.9	28.1	1.75	16.2	5.02		Yes	No	No	No
No	Mal	63	167	60	80	No	No	No	No	Yes	No					Ⅳ		No	No	Yes	No	Yes	No	No	No		Yes	No	No	No	No	4.27	9.69	8.27	234	4.57	137	43.4	82.4	12.8	30.6	3.47	1.4	0.17		Yes	No	No	No
No	Mal	72	167	84	90	No	Yes	No	No	Yes	Yes							No	No	Yes	No	Yes	No	Yes	No		Yes	No	Yes	No	No	1.26	431.51	5.4	165	4.65	145	42.47	68.2	10.3	29.2	2.18	2.3	0.59	3.62	Yes	No	No	No
No	Mal	75	164	53.5	90	No	No	No	No	Yes	No					Ⅲ		No	No	No	No	No	No	No	No		No	No	Yes	No	No	23.81		5.78	170	3.78	110	38.13	65.9	13.6	32.9	2.78	1.4	0.52		No	No	No	No
No	Mal	73	169	70	90	No	Yes	No	No	Yes	Yes					Ⅳ		No	No	No	No	No	No	No	No		No	No	Yes	No	No	3.08	106.11	5.29	180	4.94	136	48.83	95.3	11	23.2	3.69	1.8	0.6	4.98	Yes	No	No	No
No	Mal	48	167	65	70	No	No	No	No	Yes	Yes					Ⅲ		No	No	Yes	No	Yes	No	No	No		No	No	Yes	No	No	4.33	422.68	3.55	322	3.47	93	40.22	76.1	11.2	25.1	3.13	5.5	1.48	4.34	Yes	No	No	No
No	Mal	60	144	45	80	No	No	No	Yes	Yes	No							Yes	No	Yes	No	Yes	No	No	No		No	No	No	No	No	0.98	6.5	7.48	210	3.4	103	36.42	63.6	11.9	26.6	2.84	1.2	0.45		No	No	No	No
No	Fem	68	154	58	80	No	Yes	No	No	Yes	Yes					Ⅳ		No	Yes	Yes	No	No	No	Yes	No		No	No	Yes	No	No	1.06	21.66	2.93	233	3.89	99	37.52	66.5	11.1	27.8	3.35	1.5	0.54	4.27	Yes	No	No	No
No	Mal	82	158	46	70	No	No	No	No	Yes	No							No	No	No	No	No	No	No	No		No	No	Yes	No	No	1.56		4.36	279	4.09	93	42.84	64.3	11.7	27.1	3.07	1.9	0.66	4.81	No	No	No	No
No	Fem	71	145	40	70	No	Yes	No	No	Yes	No							No	No	No	No	No	No	No	No		No	No	No	No	No	26.73		6.65	377	5.49	108	41.31	62.3	13.2	35.8	2.25	1.4	0.39		No	No	No	No
No	Mal	66	154	46	90	No	No	No	No	Yes	Yes					Ⅲ		No	No	No	No	Yes	No	No	No		Yes	No	No	No	No			3.83	173	3.42	93	40.44	58	12.3	28.7	2.45	1.4	0.3	4.33	No	No	No	No
No	Mal	60	163	50	90	No	No	No	No	Yes	Yes					Ⅲ		No	No	No	No	No	No	No	No		No	No	Yes	No	No	3.14		6.58	107	4.08	132	40.75	83.3	10.2	27.8	2.67	0.7	0.19		Yes	Yes	No	No
No	Mal	72	167	56	70	No	No	No	Yes	No	Yes					Ⅰ		No	No	No	No	No	No	No	No		No	No	Yes	No	No	2.08	11.34	7.15	201	3.92	119	40.75	85.3	11.2	25.2	4.07	1.6	0.36		Yes	No	No	No
No	Fem	53	166	54	80	No	No	No	No	Yes	No							No	No	No	No	No	No	No	No		No	No	No	No	No	<0.50	10.66	6.45	166	4.27	126	50.75	62	11.9	24.9	2.72	0.8	0.17	5.12	Yes	No	No	No
No	Mal	65	164	50	90	No	No	No	No	No	No					Ⅲ		No	No	No	No	No	No	Yes	No		No	No	No	No	No	2.04	7.28	7.28	128	4.28	125	38.66	48.3	11.9	30.9	2.36	0.99	0.33		Yes	No	No	No
No	Fem	66	150	45.5	80	No	No	No	No	No	Yes					Ⅱ		No	No	No	No	No	No	No	No		No	No	Yes	No	No	1.64	4.58	2.58	193	2.61	67	36.01	47.7	9.8	19.7	2.67	3.3	0.89		Yes	No	No	No
No	Fem	58	153	50	90	No	No	No	No	Yes	No	2	1	0	T2N1M0	Ⅱ		No	No	Yes	No	Yes	No	No	No		No	No	Yes	No	No	1.8	13.14	2.6	221	4.11	119	44.51	48.1	9.8	22.6	2.93	2.6	0.53	7.72	No	No	No	No
No	Mal	61	162	53	70	No	No	No	No	Yes	No					Ⅲ		No	Yes	No	No	Yes	No	Yes	No		No	No	No	No	No	0.97	17.94	14.38	621	4.28	85	26.63	59.9	12.5	29.7	4.67	0.9	0.47		No	No	No	No
No	Mal	54	150	50	80	No	No	No	No	Yes	No					Ⅳ	[pT4aN3M0IIIC期]	No	No	No	No	No	No	No	No		No	No	No	No	No	65.46	20.74	5.48	320	5.33	154	46.97	64.7	12.3	24.7	2.84	0.18	0.06	5.64	Yes	No	No	No
No	Mal	48	167	63	90	No	No	No	No	Yes	No	1	0	1	T1N0M1	Ⅳ		No	No	No	No	Yes	No	No	No		Yes	No	No	No	No	3.33	78.94	2.93	164	4.05	100	42.09	54	11	29.7	2.93	0.6	0.12	6.27	Yes	Yes	No	No
No	Mal	64			50	No	No	No	No	Yes	No					Ⅳ		No	Yes	No	No	No	No	No	No		No	No	No	No	No			10.81	337	4.01	120	23.2	58	13.2	30.5	5	9.8	3.33		No	No	No	No
No	Mal	61	165	52	80	No	No	No	No	Yes	No					Ⅱ		No	No	No	No	No	No	No	No		No	No	Yes	No	No	2.19	16.06	9.52	296	2.39	91	42.6	87.9	12.2	23.7	2.71	2	0.36		No	No	No	No
No	Mal	53	156	50	80	No	No	No	No	Yes	No					Ⅲ		No	No	Yes	No	No	No	No	No		Yes	No	Yes	No	No	2.07	4.67	5.73	127	4.47	137	42.97	75.3	10.9	28.4	1.94	2.6	0.58		No	No	No	No
No	Mal	66				No	No	No	No	Yes	Yes	3	2	0	T3N2M0	Ⅲ		No	No	No	No	No	No	No	No		No	No	Yes	No	No	1.06		5.73	217	4.76	146	47.55	65.6	11	25.8	2.71	0.8	0.1	4.79	Yes	No	No	No
No	Mal	61	150	61	90	No	No	No	No	Yes	Yes	1	0	0	T1N0M0	Ⅰ		No	No	No	No	No	No	No	No		No	No	Yes	No	No	2.64		5.7	243	5.64	119	39.71	61	13.1	35.8	2.16	0.3	0.11	4.38	Yes	No	No	No
No	Fem	70	152	40	80	No	No	No	No	Yes	No					Ⅳ		No	No	No	No	No	No	No	No		No	No	No	No	No															No	No	No	No
No	Mal	64	161	53	90	No	No	Yes	No	Yes	No							No	No	No	No	No	No	No	No		Yes	No	Yes	No	No	19.28	>700.00	6.83	98	4.66	140	42.78	81.3	11.6	26.4	4.78	1.8	0.43	4.49	Yes	No	No	No
No	Mal	78	171	59	80	No	No	No	No	Yes	No	3	2	1	T3N2M1	Ⅳ		No	No	No	No	No	No	No	No		Yes	No	Yes	No	No	12.57	>700.00	4.46	140	4.09	121	41.87	62.8	12.3	26.6	3.13	1.9	0.53	4.48	Yes	Yes	No	No
No	Mal	48	157	47	70	No	No	No	No	No	No							No	No	No	No	No	No	No	No		No	No	No	No	No	1.38	9.64	16.38	163	4.71	160	49.57	80.3	11.5	18.4	2.1	0.7	0.72		No	No	No	No
No	Mal	72	165	62	80	No	No	No	No	Yes	Yes	4	0	0	T4N0M0	Ⅱ		No	No	No	No	Yes	No	No	No		No	No	Yes	No	No	5.39	614.63	4.84	120	4.07	131	42.17	66.3	11.8	28.2	2.47	0.5	0.32	3.85	Yes	No	No	No
Yes	Mal	69	165	54	80	No	No	No	No	Yes	Yes	3	0	0	T3N0M0	Ⅱ		No	No	No	No	No	No	No	No		No	No	Yes	No	No	8.23	>700.00	6.79	272	3.21	94	40.2	74.8	12.9	25.8	2.89	9.4	3.75	4.59	Yes	No	No	No
No	Mal	54	170	64	90	No	No	No	No	Yes	No	1	0	1	T1N0M1	Ⅳ		No	No	No	No	No	No	No	No		Yes	No	Yes	No	No	0.53	13.08	4.87	104	4.31	134	39.79	65.4	11.1	30.2	2.49	1.2	0.33		Yes	No	No	No
No	Mal	64	167	65	80	No	No	No	No	Yes	Yes	4	X	1	T4NXM1	Ⅳ	[BormamnⅣ型cT4bNxM1Ⅳ期]	No	No	No	No	Yes	No	Yes	No		No	No	Yes	No	No	2.48	1361.3	8.57	290	3.9	74	37.98	61.1	12.6	26.4	4.32	19.9	7.62		Yes	No	No	No
No	Mal	61	167	65	80	No	No	No	No	Yes	Yes	3	0	0	T3N0M0	Ⅱ		No	No	No	No	No	No	No	No		No	No	Yes	No	No			5.81	234	4.37	141	41.66	61.8	10.8	23.4	1.82	0.2	0.14	4.62	Yes	No	No	No
No	Mal	52	163	68	80	No	No	No	No	Yes	Yes	2	1	0	T2N1M0	Ⅱ	[pT2N1M0ⅡA期]	No	Yes	Yes	No	Yes	No	No	No		Yes	No	Yes	No	No	1.03	6.1	5.77	211	5.12	153	47.54	80.5	11.2	24.7	1.8	0.2	0.07	5.44	Yes	No	No	No
No	Mal	72	161	47	70	No	Yes	Yes	Yes	Yes	Yes	2	1	0	T2N1M0	Ⅱ	[cT2N1M0IIB期]	No	No	No	No	Yes	No	No	No		No	No	Yes	No	No	1.47	6.96	4.46	158	1.96	47	21.05	54.9	12.8	40.5	3.29	2.2	0.77	2.1	No	No	No	No
No	Mal	54	160	36.5	70	No	No	No	Yes	Yes	No							No	No	No	No	No	No	No	No		No	No	No	No	No	2.75	23.63	6.83	193	3.96	133	45.48	59	11.9	27.4	3.13	0.5	0.06		No	No	No	No
No	Mal	69	173	55	80	No	No	No	No	Yes	No	X	X	1	TXNXM1	Ⅳ	[TXNXM1Ⅳ期]	No	Yes	No	No	Yes	No	No	No		Yes	No	Yes	No	No	11.16	5.16	7.7	332	4.08	127	40.27	75	11	29.3	6.2	14.6	5.07	1.72	Yes	No	No	No
No	Mal	54	158	52	40	No	No	No	No	Yes	No	4	3	1	T4N3M1	Ⅳ	[cT4N3M1IV期]	No	No	No	No	No	No	No	No		No	No	Yes	No	No	<0.50	55.97	32.79	209	3.84	106	22.59	77.9	24.2	44.4	3.42	8	2.6	0.36	Yes	No	No	No
No	Mal	82	156	47.5	90	No	No	No	No	Yes	No	3	3	1	T3N3M1	Ⅳ		No	No	No	No	Yes	No	Yes	No		No	No	Yes	No	No	4.25	32.49	5.89	288	3.27	92	37.9	76.7	11.4	25.1	4.07	4.5	1.34	5.93	No	No	No	No
Yes	Mal	49	180	73	70	No	No	No	No	Yes	Yes	1	0	0	T1N0M0	Ⅰ	[PT1N0M0I期]	No	No	No	No	Yes	No	No	No		Yes	No	Yes	No	Yes	1.28	6.65	6.5	179	5.04	158	51.13	95.2	11.7	23.8	1.47	0.3	0.09	0.89	Yes	No	No	No
No	Fem	73	140	45	60	No	No	No	No	Yes	No							No	No	No	No	Yes	No	No	No		No	No	Yes	No	No	2.1	<1.20	3.76	276	3.07	75	35.9	71.5	13.3	30.3	2.16	5.7	1.82	0.53	Yes	No	No	No
No	Mal	62	168	57	70	No	Yes	No	Yes	Yes	No	X	X	1	TXNXM1	Ⅳ	[Ⅳ期cTxNxM1]	No	No	No	No	No	No	No	No		No	No	Yes	No	No	<0.50	15.28	10.86	119	3.73	110	34.03	85.2	12.2	26.3	4.1	4	1.09	7.9	Yes	No	No	No
No	Mal	64	165	45	60	No	Yes	No	No	No	No	X	X	1	TXNXM1	Ⅳ		No	No	Yes	No	Yes	No	Yes	No		Yes	No	Yes	No	No	8.58	105.49	10.67	383	4.78	139	40.63	105.5	11.6	25.8	4.32	14.9	5.28		No	No	No	No
No	Mal	63	165	50	80	No	No	No	No	No	Yes	4	3	1	T4N3M1	Ⅳ	[T4aN3M1Ⅳ期]	No	No	No	No	Yes	No	No	No		No	No	No	No	No	394.7	19.05	5.06	173	3.2	93	34.9	58.4	12.9	30.7	3.55	7.1	2.09		No	No	No	No
No	Mal	63	157	50	90	No	No	No	No	Yes	Yes							No	No	No	No	Yes	No	No	No		No	No	Yes	No	No	1	7.92	6.91	120	4.49	131	39.89	66.6	11	21.4	3.49	2.2	0.79	3.51	Yes	No	No	No
No	Mal	67	170	57	70	No	No	No	Yes	Yes	Yes							No	Yes	No	No	Yes	No	No	No		No	No	Yes	No	No	36.3	144.73	2.91	599	3.17	67	42.33	74.6	12.5	25.4	2.51	1.7	0.58	2.4	Yes	No	No	No
No	Mal	51	162	70	90	No	Yes	No	No	Yes	No	4	2	1	T4N2M1	Ⅳ	[T4aN2M1IV期]	No	No	Yes	No	Yes	No	No	No		Yes	No	Yes	No	No	16.06	23.92	4.05	196	4.53	133	46.9	74.4	11	26.7	2.51	2.2	0.83	3.53	Yes	Yes	No	No
No	Mal	67	172	60	90	No	Yes	No	No	No	Yes	4	3	0	T4N3M0	Ⅳ		No	No	No	No	Yes	No	No	No		Yes	No	Yes	No	No	3.85	17.04	6.32	105	3.47	76	37.87	78.5	11.4	26	1.67	21.8	7.4	2.16	Yes	No	No	No
No	Mal	73	156	44	80	No	No	No	No	Yes	No	2	0	0	T2N0M0	Ⅰ		No	No	No	No	No	No	No	No		No	No	Yes	No	No	3.44	18.51	5.21	106	3.94	127	39.38	59.4	10.8	31.4	4.1	2.6	0.65	4.26	Yes	No	No	No
No	Fem	55	151	50	90	No	No	No	No	No	No							No	No	No	No	No	No	No	No		No	No	Yes	No	No	2.16	23.01	3.78	158	4.45	129	45.37	46.7	11.4	25.5	2.59	0.6	0.11	5.55	Yes	No	No	No
No	Fem	26	163	58	90	No	No	No	No	No	No					Ⅰ		Yes	No	Yes	No	No	No	No	No		No	No	Yes	No	No	<0.50	15.89	14.91	180	4.3	121	44.17	54.9	11.7	32.4	2.6	0.8	0.13		Yes	No	No	No
No	Fem	58	150	53	90	No	No	No	No	Yes	No	4	1	1	T4N1M1	Ⅳ	[IV期T4NxM1]	Yes	No	Yes	No	No	No	Yes	No		Yes	No	Yes	No	No	0.82	19.6	5.29	212	3.83	119	41.85	46	11.8	27.3	3.36	2.4	0.86		Yes	No	No	No
No	Mal	60	156	54	90	No	No	No	No	Yes	Yes	4	2	0	T4N2M0	Ⅲ		No	No	Yes	No	No	No	No	No		No	No	Yes	No	No	7.13	7.54	5.08	123	5.03	169	41.6	57.8	10.6	24	4.46	0.8	0.2	3.42	Yes	No	No	No
No	Mal	77	165	60	80	No	No	No	No	Yes	No	4	X	1	T4NXM1	Ⅳ		No	Yes	Yes	No	Yes	No	No	No		Yes	No	Yes	No	No	3.55	16.01	5.41	235	3.84	81	35.08	126.8	11.1	27.2	5.12	3.1	0.77	3.94	Yes	No	No	No
No	Mal	50			20	No	No	No	No	Yes	Yes							Yes	No	No	No	Yes	No	No	No		No	No	No	No	No	1.4	6.32	11.6	121	0.91	32	23.1	80.9	11.7	31.6	1.85	1.2	0.39		No	No	No	No
No	Mal	70	164	64	90	No	Yes	No	No	Yes	No	3	2	0	T3N2M0	Ⅲ	[PT3N2M0IIIa期]	No	No	Yes	No	Yes	No	No	No		Yes	No	Yes	No	No	1.53		4.41	135	3.35	109	36.58	83.3	13.1	27.3	2.35	8.7	2.24	3.17	No	No	No	No
No	Mal	60	172	70	60	No	Yes	No	No	No	No							No	No	Yes	No	Yes	No	Yes	No		No	No	No	No	No	0.69	48.57	7.6	676	3.91	88	44.02	83.6	13.4	25.3	4.32	12.7	5.18	3.84	No	No	No	No
No	Mal	72	165	69	80	No	Yes	No	Yes	Yes	Yes	4		0	T4M0	Ⅳ	[T4NxM0IV期]	Yes	No	Yes	No	Yes	No	No	No		Yes	No	No	No	No	2.48	12.45	4.34	207	2.86	63	33.67	61.5	11.8	25.3	3.24	3.5	0.81	3.2	Yes	Yes	No	No
No	Fem	77	156	51	70	No	No	No	No	Yes	No	3	0	0	T3N0M0	Ⅱ		No	No	No	No	Yes	No	No	No		No	No	Yes	No	No	<0.50	8.67	7.34	132	4.31	132	44.85	42.1	10.5	20	3.48	2.2	0.61	4.29	No	No	No	No
No	Mal	59	170	55	70	No	No	No	No	Yes	No	4	X	1	T4NXM1	Ⅳ	[T4NxM1]	No	No	No	No	No	No	No	No		No	No	No	No	No	58.58	29.23	7.72	243	4.15	111	43.27	86.6	11.7	27.1	3.18	17	7.07		Yes	No	No	No
No	Mal	63	157	47.5	70	No	No	No	No	Yes	No	4	3	1	T4N3M1	Ⅳ		No	Yes	No	No	No	No	No	No		Yes	No	No	No	No	1	529.82	15.2	267	3.41	116	39.79	44.7	12.9	26.1	5.18	15.1	7.27	4.77	Yes	Yes	No	No
No	Mal	76	169	49	70	No	Yes	No	No	Yes	No	1	2	1	T1N2M1			No	No	No	No	Yes	No	No	No		No	No	No	No	No	3.44	19.12	4.49	129	3.14	94	40.89	115.1	12.1	21	5.37	6.2	1.35		Yes	No	No	No
No	Fem	45	155	39.5	80	No	No	No	No	Yes	No	2	2	1	T2N2M1	Ⅳ	[T2N2M1ⅣB期]	No	No	No	No	No	No	No	No		No	No	Yes	No	No	10.39		13.63	347	4.3	124	44.38	43	11.1	21.9	3.76	6.7	1.97	3.33	Yes	No	No	No
No	Fem	51	159	48	80	No	No	No	No	Yes	Yes	4	2	1	T4N2M1	Ⅳ	[cT4N2M1IV期]	Yes	Yes	No	No	Yes	No	No	No		Yes	No	Yes	No	No	>100.00	341.55	6.24	70	2.96	90	35.93	44	12.2	31.8	1.76	58.4	>10.00		Yes	No	No	No
No	Fem	72	150	42.5	70	No	No	No	No	No	No	3	0	0	T3N0M0	Ⅰ		No	No	No	No	No	No	Yes	No		No	No	No	No	No			3.18	168	4.03	116	38.29	49.1	11.6	23.5	3.35	6.3	2.11		No	No	No	No
No	Mal	73	158	53	90	No	No	No	No	Yes	No	2	2	0	T2N2M0	Ⅲ		No	No	No	No	No	No	No	No		No	No	Yes	No	No	4.91		5.41	263	4.53	135	37.59	53.6	10.1	23.9	4.2	3.2	0.62	5.66	Yes	No	No	No
No	Mal	76	154	56.5	90	No	No	No	No	Yes	Yes							No	No	No	No	No	No	No	No		No	No	Yes	No	No	1.29	151.98	6.51	175	4.83	156	43.18	76.4	11	24.3	3.84	6.4	1.87	5.11	Yes	No	No	No
No	Mal	49	155	61	80	No	No	No	No	Yes	No	1	0	0	T1N0M0	Ⅰ	[pT1N0M0I期]	No	No	No	No	No	No	No	No		No	No	No	No	No	2.26	13.37	6.88	156	4.52	125	47.44	219.2	12.2	28.4	4.1	1.1	0.24	3.35	No	No	No	No
No	Mal	53	175	62	80	No	Yes	No	No	Yes	No	X	X	1	TXNXM1	Ⅳ	[TxNM1IV期]	No	No	No	No	No	No	No	No		No	No	No	No	No	2.91	14.7	3.82	157	4.05	121	43.94	48.4	12.3	30.3	3.63	1.5	0.42		No	No	No	No
No	Mal	70	161	43.5	90	No	No	No	No	Yes	No	X	X	1	TXNXM1	Ⅳ		No	No	No	No	No	No	No	No		No	No	No	No	No	>100.00	11.3	6.65	89	3.18	102	36.78	53.9	13.7	26.3	3.03	5.1	1.19	7.66	Yes	No	No	No
No	Fem	77	152	50	80	No	No	No	No	Yes	No							No	No	No	No	No	No	No	No		No	No	No	No	No	1.23	31.75	4.46	145	3.6	111	40.01	72.1	11.8	25.8	3.56	8.1	2.35	4.19	No	No	No	No
No	Mal	66	171	52.5	80	No	Yes	No	No	Yes	No	3	1	0	T3N1M0	Ⅲ		No	No	No	No	Yes	No	No	No		Yes	No	No	No	No	68.27	33.7	3.86	263	3.55	98	44.59	83.7	12.3	25	2.09	3.7	1.08	3.38	Yes	No	No	No
No	Fem	48	157	51	80	No	No	No	No	Yes	No	2	1	1	T2N1M1	Ⅳ		No	No	No	No	No	No	Yes	No		No	No	No	No	No	4.07	8.12	6.56	300	4.89	130	39.78	66	11.1	30.1	3.23	5.7	1.65		No	No	No	No
No	Mal	41	163	53	90	No	No	No	No	Yes	No							No	No	No	No	No	No	No	No		No	No	No	No	No	40.11	>700.00	8.39	202	5.25	164	53.08	61.7	10.2	21.4	2.63	5.4	1.36		Yes	No	No	No
No	Mal	79	169	60	70	No	No	No	No	Yes	No	4	2	0	T4N2M0	Ⅲ	[cT4bN2M0III期]	No	No	No	No	No	No	No	No		No	No	No	No	No	43.99	>700.00	6.78	212	3.51	106	36.43	42.5	12.2	24.8	4.6	2.3	0.77	4.14	Yes	No	No	No
No	Mal	80	163	64	80	No	No	No	No	Yes	No	4	1	0	T4N1M0	Ⅲ		No	No	No	No	No	No	No	No		No	No	No	No	No	3.73	26.43	8.35	184	4.46	136	46.38	78.6	11.7	24.2	3.55	1.6	0.42	6.41	Yes	No	No	No
No	Mal	53	166	54	80	No	No	No	No	Yes	No			1	M1	Ⅳ	[rTxNxM1IV期]	No	No	Yes	No	Yes	No	No	No		Yes	No	Yes	No	No	7.94	14.11	3.44	155	2.8	99	44.57	103.2	11	27.1	3.24	1.8	0.48	1.4	Yes	Yes	No	No
No	Mal	52	175	48	80	No	No	No	No	Yes	Yes	4	3	1	T4N3M1	Ⅳ	[pT4aN3aM1Ⅳ期]	No	No	No	No	Yes	No	Yes	No		No	No	Yes	No	No	<0.50	17.47	4.96	341	3.79	112	34.67	59.5	10.7	24.4	4.1	1.2	0.3	3.65	Yes	No	No	No
No	Mal	56		43	80	No	No	No	No	Yes	Yes							No	No	Yes	No	Yes	No	No	No		Yes	No	No	No	No	2.22	72.88	10.4	279	4.68	145	46.63	75.8	11.6	28	3.3	1.7	0.56	4.54	No	Yes	No	No
No	Mal	79	159	59	70	No	No	No	No	Yes	No	X	X	0	TXNXM0			No	No	No	No	No	No	No	No		No	No	No	No	No	1.43	21.97	7.57	173	3.34	101	32.07	66.6	11.7	27.6	4.47	3.5	0.8	2.7	No	No	No	No
No	Mal	65	166	41	70	No	Yes	No	No	Yes	No							No	Yes	No	No	Yes	No	No	No		No	No	No	No	No	3.32	14.16	1.76	147	3.4	87	41.71	41.8	12	32.9	2.05	1.1	0.7		Yes	No	No	No
No	Mal	71	172	55	90	No	No	No	No	Yes	No	3	1	1	T3N1M1	Ⅳ		No	No	No	No	Yes	No	No	No		Yes	No	No	No	No	2.53	27.95	4.26	170	4.4	131	42.04	72.8	11.9	29.9	4.33	1.8	0.41	3.81	Yes	Yes	No	No
No	Mal	62	163	55	80	No	No	No	No	Yes	Yes	X	0	1	TXN0M1	Ⅳ		No	No	No	No	No	No	No	No		No	No	Yes	No	No	<0.50	22.92	8.38	350	3.9	123	38.08	76.2	12.1	27.6	5.72	1	0.31	5.1	Yes	No	No	No
No	Mal	46	156	56.5	90	No	No	No	No	Yes	Yes	3	2	0	T3N2M0	Ⅲ		No	No	Yes	No	No	No	No	No		No	No	Yes	No	No	3.55	19.97	4.59	185	4.78	137	39.95	68	12.1	28.5	3.07	1	0.27	5.24	Yes	No	No	No
No	Fem	63	164	57	70	No	Yes	No	No	Yes	No	4	X	1	T4NXM1	Ⅳ		No	No	Yes	No	Yes	No	No	No		No	No	No	No	No	0.8		2.45	121	3.93	68	38.76	68.4	11.1	23.6	2.52	3.5	0.87		No	No	No	No
No	Mal	52	168	65	80	No	No	No	No	Yes	No							No	No	Yes	No	No	No	No	No		Yes	No	No	No	No	0.93	41.4	3.3	154	4.07	131	38.08	78	11	26.2	3.95	1.7	0.43		No	Yes	No	No
No	Mal	80	165	58	90	No	Yes	No	No	No	No							No	No	No	No	No	No	No	No		No	No	No	No	No	0.7	5.21	4.18	206	4.48	140	44.59	59.9	12.6	27.1	2.3	<2.50	0.22	3.42	Yes	No	No	No
No	Mal	75	168	56	70	No	No	No	No	Yes	No	0	X	1	T0NXM1	Ⅳ	[rT0NxM1Ⅳ期]	No	No	Yes	No	Yes	No	No	No		Yes	No	Yes	No	No	1.23	31.94	4.88	250	3.85	101	37.77	74.7	11.2	27.5	3.35	8.3	2.53	2.34	Yes	Yes	No	No
No	Fem	29	164	58	80	No	No	No	No	Yes	No	4	X	1	T4NXM1	Ⅳ	[cT4NxM1Ⅳ期]	No	No	No	No	Yes	No	No	No		Yes	No	Yes	No	No	<0.50	12.99	6.35	275	3.47	76	38.09	65.3	12.5	25.6	3.13	2.8	0.76		Yes	No	No	No
No	Mal	79	150	49	70	No	Yes	No	No	Yes	No	3	2		T3N2			No	No	No	No	Yes	No	No	No		Yes	No	No	No	No	>100.00	15.64	6.69	367	3.49	71	39.1	65.5	12.1	31.5	3.29	3	1.13	3.85	No	Yes	No	No
No	Mal	75	154	49	70	No	No	No	No	Yes	No							No	No	No	No	Yes	No	No	No		Yes	No	No	No	No	0.91	17.73	13.29	414	3.35	98	30.91	65.5	13.5	27.5	5.31	7.5	2.02	3.23	Yes	Yes	No	No
No	Fem	50	155	42	60	No	No	No	No	Yes	No		0	1	N0M1	Ⅳ	[rT4NxM1Ⅳ期]	No	No	No	No	Yes	No	No	No		No	No	No	No	No	0.6	6.54	4.63	144	3.44	91	35.39	42.7	11.9	28.3	3.35	1.6	0.34	3.48	Yes	No	No	No
No	Mal	62	168	55	80	No	No	No	No	Yes	No	3	3	X	T3N3MX		[T3N3MX]	No	No	No	No	No	No	No	No		No	No	No	No	No	4.33	49.93	7.47	237	4.51	127	42.31	89.8	10.9	28.8	3.03	0.32	0.2	5.35	No	No	No	No
No	Mal	74	156	46	80	No	Yes	Yes	No	No	Yes							No	Yes	No	No	Yes	No	No	No		No	No	Yes	No	No	<0.50	16.18	5.64	142	3.4	115	39.88	552.5	12.5	30.9	4.32	3.4	1.05	3.56	Yes	No	No	No
Yes	Mal	63	164	45	70	No	No	No	No	Yes	Yes					Ⅳ		No	No	No	No	Yes	No	No	No		Yes	No	Yes	No	No	0.98	15.78	3.29	200	4.16	132	39.03	68.3	11.8	29	4.83	2.6	0.98		Yes	No	No	No
No	Mal	75	157	43	80	No	Yes	No	No	Yes	No	3	2	1	T3N2M1	Ⅳ	[cT3N2M1IV期]	No	No	No	No	Yes	No	No	No		Yes	No	Yes	No	No	2.31	16.76	7.19	183	2.72	77	41.1	103.4	11.4	23.3	2.93	0.9	0.2		Yes	Yes	No	No
No	Fem	56	164	48	70	No	No	No	No	Yes	No	4	X	1	T4NXM1	Ⅳ		Yes	No	Yes	No	Yes	No	No	No		Yes	No	No	No	No	2.02	9.08	2.92	159	3.64	107	42.55	38.5	11.8	25.1	2.68	4.2	1.02	4.15	No	Yes	No	No
No	Mal	63	-5	-5	70	No	No	No	No	Yes	No							No	Yes	No	No	No	No	No	No		No	No	Yes	No	No			5.26	155	4.28	127	28.08	50	13.9	30	5.37	2.7	0.95		No	No	No	No
No	Mal	50	165	65	80	No	No	No	No	Yes	Yes	3	0	0	T3N0M0	Ⅱ		Yes	No	No	No	No	No	No	No		No	No	Yes	No	No	5.99	21.36	20.72	219	4.57	146	44.65	65	11.3	18.3	1.89	6.6	1.92	4.19	Yes	No	No	No
No	Fem	48	165	50	80	No	No	No	No	No	No	4	0	0	T4N0M0	Ⅱ		No	No	Yes	No	Yes	No	No	No		Yes	No	No	No	No	1.57	27.13	5.08	161	4.16	128	48.19	59.1	11.6	22	2.98	1	0.35	5.63	Yes	No	No	No
No	Mal	57				No	No	No	No	Yes	Yes	4	3	0	T4N3M0	Ⅲ	[pT4aN3aM0ⅢC期]	No	No	Yes	No	Yes	No	No	No		No	No	Yes	No	No	5.44	45.58	7.13	223	4.81	160	49.18	78	10.8	21.5	3.24	1	0.2	4.16	Yes	No	No	No
No	Mal	68	160	64	80	No	No	No	No	Yes	No	3	2	0	T3N2M0	Ⅲ		No	No	Yes	No	Yes	No	No	No		Yes	No	Yes	No	No	3.13	20.81	3.15	186	2.85	86	42.78	93.6	11	21.6	2.49	3.2	0.83	2.81	No	Yes	No	No
No	Mal	84	166	70	80	No	Yes	No	No	Yes	No	4	X	0	T4NXM0	Ⅲ		No	No	No	No	No	No	No	No		Yes	No	No	No	No	<0.50	12.62	5.49	192	4.62	124	44.66	63.5	10.2	22.1	4.94	4.4	1.11	4.55	No	Yes	No	No
No	Mal	48	177	61	90	No	No	No	No	Yes	No	4	1	0	T4N1M0	Ⅲ	[T4aN1M0A]	No	No	No	No	No	No	No	No		Yes	No	Yes	No	No	18.83	8.81	5	267	4.55	126	43.37	76.2	11.2	25.3	2.89	0.8	0.21		Yes	Yes	No	No
No	Mal	64	170	43.5	90	No	No	No	No	Yes	No	X	0	1	TXN0M1	Ⅳ	[PT1N1M0IB期]	No	No	No	No	No	No	No	No		Yes	No	Yes	No	No	4.46	50	5.82	490	4.52	130	40.64	51.2	12.9	36.5	4.67	2.6	0.69		No	Yes	No	No
No	Mal	51	160	62	70	No	No	No	No	No	No	2	0	0	T2N0M0	Ⅰ		No	No	No	No	No	No	No	No		No	No	Yes	No	No	<0.50	8.34					48.1	86	12.3	19	2.7	0.38	0.13		No	No	No	No
No	Fem	52	153	45	70	No	No	No	No	Yes	No							No	No	No	No	Yes	No	No	No		No	No	No	No	No	2.92	28.97	4.98	123	3.76	99	33.25	62.4	11.1	26	3.35	3.2	0.92		No	No	No	No
No	Fem	66	155		90	No	Yes	No	Yes	Yes	No	2	0	0	T2N0M0	Ⅱ		No	No	No	No	No	No	No	No		No	No	No	No	No									10.7	19.8	2.89	<2.50	0.5		Yes	No	No	No
No	Fem	37	165	52.5	90	No	No	No	No	Yes	No	4	3	0	T4N3M0	Ⅳ		No	No	No	No	Yes	No	No	No		Yes	No	No	No	No	1.72	7111	5.48	300	3.91	92	40.4	88.8	12.2	30	5.12	4.8	1.23	3.73	No	No	No	No
No	Mal	76	164	48	90	No	Yes	No	No	Yes	No							Yes	Yes	No	No	Yes	No	No	No		No	No	Yes	No	No	1.19	10.28	5.87	166	4.7	142	43.86	85.6	11.4	28.8	2.63	5.9	1.58	4.14	No	No	No	No
No	Fem	68	155	46	70	No	Yes	No	No	Yes	No							No	No	No	No	Yes	No	No	No		No	No	No	No	No			3.15	123	3.84	96	41.86	57.4	10.7	24.2	4.78	2.2	0.59		No	No	No	No
No	Mal	61	160	49	80	No	No	No	No	Yes	No							No	No	No	No	No	No	No	No		No	No	No	No	No	1.78	12.45	2.05	140	2.15	94	40.57	71.1	11.4	28.1	2.6	2.2	0.58		No	No	No	No
No	Mal	54	166	50	90	No	No	No	No	Yes	No	2	1	1	T2N1M1	Ⅳ		No	No	No	No	No	No	No	No		No	No	No	No	No	1.02		5.76	253	3.49	97	37.8	93	11.5	31.4	4.94	4.9	1.28	4.51	Yes	No	No	No
No	Mal	66	152	50	60	No	Yes	No	No	Yes	No	X	3	1	TXN3M1	Ⅳ	[Ⅳ期cTxN3M1]	No	No	No	No	Yes	No	No	No		No	No	Yes	No	No			4.7	122	2.29	64	40.42	227	12.4	32.1	4.47	13	4.91		Yes	No	No	No
No	Mal	60	153	48	70	No	No	No	No	Yes	No	4	3	1	T4N3M1	Ⅳ	[T4N3M1IV期]	No	No	No	No	No	No	No	No		No	No	No	No	No	7.53	49.58	9.17	261	3.91	117	36.83	66.2	10.9	26.2	4.47	4.3	0.9		No	No	No	No
No	Mal	62	162	72	90	No	No	No	No	Yes	Yes	4	0	0	T4N0M0		[pT4aN0M0IIb期]	No	Yes	No	No	No	No	No	No		No	No	Yes	No	No	<0.50	24.07	6.2	220	4.75	153	38.66	68	9.7	26	2.98	0.5	0.16	4.79	Yes	No	No	No
No	Mal	70	166	67	90	No	Yes	No	No	Yes	Yes	3	0	0	T3N0M0	Ⅱ		No	Yes	No	No	No	No	No	No		No	No	Yes	No	No	4.78	9.02	4.88	245	4.54	137	42	73.6	10.3	23.8	2.56	1.6	0.38	4.37	Yes	No	No	No
No	Mal	61	151	54	80	No	No	No	No	Yes	No							No	No	No	No	No	No	No	No		No	No	Yes	No	No	0.75	9.25	6.84	301	4.63	148	48	58.7	10.2	29	2.88	1.9	0.56	4.12	Yes	No	No	No
No	Mal	72	157	67.5	90	No	No	No	No	Yes	Yes	3	1	0	T3N1M0	Ⅲ		No	No	No	No	Yes	No	No	No		No	No	Yes	No	Yes	<0.50		6.22	168	4.04	123	36.57	67.1	10.5	20.2	3.69	4.3	0.84	3.6	Yes	No	No	No
No	Mal	68	160	62	90	No	No	No	No	Yes	No							No	No	No	No	Yes	No	No	No		Yes	No	No	No	No	9.81	13.48	10.3	289		114	32.15	64.8	11.6	25.2	4.77	2.9	0.82		No	Yes	No	No
No	Fem	51	160	53	90	No	No	No	No	Yes	No	X	2	0	TXN2M0	Ⅲ	[pTxN2M0Ⅲ期]	No	No	No	No	Yes	No	No	No		Yes	No	Yes	No	No	<0.50	10.43	7.36	200	3.74	114	38.32	44.6	12.2	36.5	6.19	28.4	8.7		No	Yes	No	No
No	Mal	58	174	73	90	No	No	No	No	Yes	No	3	X	0	T3NXM0	Ⅲ	[cT3-4NxM0]	No	No	No	No	No	No	No	No		No	No	No	No	No	<0.50	27.42	6.92	153	4.92	156	46.12	57.1	10.4	26.6	3.13	0.7	0.13	3.47	No	No	No	No
No	Fem	52	165	50	60	No	No	No	No	Yes	No	1	1	1	T1N1M1	Ⅳ	[T1bN1M1Ⅳ期]	Yes	No	No	No	Yes	No	Yes	No		No	No	No	No	No	<0.50	12.93	5.18	287	3.09	89	33.24	107	13.8	25.6	3.49	17.5	8.52		Yes	No	No	No
No	Mal	57	165	60	80	No	Yes	No	No	No	No							No	Yes	No	No	No	No	No	No		No	No	No	No	No	3.03	15.07	6.41	206	3.66	115	34.18	65.4	14.9	32.9	2.43	5.4	1.42		No	No	No	No
No	Mal	33			60	No	No	No	No	Yes	Yes	4	2	1	T4N2M1	Ⅳ	[T4N2M1Ⅳ期]	Yes	No	No	No	Yes	No	No	No		No	No	No	No	No	8.26	1384.8	4.57	56	2.07	65	27.26	89.5	19	37.3	2.05	55.1	>10.00	1.51	Yes	No	No	No
No	Mal	68	157	49	80	No	No	No	No	Yes	No	4	2	1	T4N2M1	Ⅳ	[cT4bN2M1b]	No	No	No	No	Yes	No	No	No		No	No	No	No	No	6.34	4.52	8.09	56	3.69	111	35.9	64.3	13.2	28.4	1.98	31	6.13		No	No	No	No
No	Fem	54	157	46	70	No	No	No	No	Yes	No	X	X	1	TXNXM1	Ⅳ		No	No	No	No	No	No	No	No		No	No	Yes	No	No	3.21	205.65	4.28	226	3.88	119	40.16	38.9	11.3	30.4	2.8	3.7	1.06		Yes	No	No	No
No	Fem	45	163	52	90	No	No	No	No	Yes	Yes	2	0	0	T2N0M0	Ⅰ	[pT2N0M0Ⅰb期]	No	No	No	No	Yes	No	No	No		No	No	Yes	No	No	2.38	12.55	5.44	186	4.47	132	51.81	58.2	11.4	24.2	2.88	0.6	0.1	3.45	Yes	No	No	No
No	Fem	69	155	53	80	No	No	No	No	Yes	Yes	3	2	0	T3N2M0	Ⅲ		No	Yes	No	No	Yes	No	No	No		No	No	Yes	No	No	0.88	136.81	5.17	114	4.03	111	44.37	59	11.3	29.7	4.47	0.8	0.18	4.43	Yes	No	No	No
No	Mal	64	162	59	80	No	No	No	No	Yes	Yes	4	2	0	T4N2M0	Ⅲ	[pT4aN2M0ⅢA期]	No	Yes	No	No	Yes	No	No	No		Yes	No	Yes	No	No	1.22	28.88	3.86	131	3.4	102	40.49	70.2	12.5	26.4	2.54	0.7	0.27	4.34	Yes	No	No	No
Yes	Fem	68			60	No	No	No	No	Yes	Yes	x	x	1	TxN xM1	Ⅲ		Yes	Yes	No	No	Yes	No	No	No		No	No	Yes	No	No			7.55	207	2.68	92	25.43	52.6	10.2	21.9	6.75	6.7	2.28	5.78	Yes	No	No	No
No	Mal	83	160	57	70	No	Yes	No	No	Yes	No	4	3	1	T4N3M1	Ⅳ		No	No	No	No	No	No	No	No		No	No	No	No	No	8.53	529.19	11.26	226	4.36	127	29.77	76.4	13.2	28.1	2.39	20.8	7.88		Yes	No	No	No
No	Mal	52	155	39	60	No	No	No	No	Yes	No			1	M1	Ⅳ	[TxNxM1IV期]	No	No	No	No	Yes	No	No	No		No	No	Yes	No	No	13.61	25.15	5.19	93	2.81	90	25	35.9	12.6	39.2	2.6	39.7	12.33		No	No	No	No
No	Mal	78	165	55	90	No	No	No	No	Yes	No	4			T4		[cT4NxMx]	Yes	No	No	No	Yes	No	No	No		No	No	No	No	No	<0.50	13.25	4.94	357	2.83	85	30.52	68.2	12.1	28.8	4.46	7.8	2.73	3.49	Yes	No	No	No
No	Fem	76	135	34	60	No	No	No	No	Yes	No	4	3	0	T4N3M0	Ⅲ	[cT4N3M0ⅢC期]	No	No	No	No	Yes	No	No	No		No	No	No	No	No	14.13	74.33	3.94	151	3.38	96	36.31	48.9	9.9	26.7	3.35	3.1	0.71	3.81	No	No	No	No
No	Mal	45	160	59	90	No	Yes	No	No	Yes	Yes	4	2	0	T4N2M0	Ⅲ	[pT4bN2M0ⅢB期]	No	Yes	Yes	No	Yes	No	Yes	No		Yes	No	Yes	No	No	<0.50	10.26	6.53	375	3.57	96	47.84	62.8	12.4	23.8	2.83	1.4	0.95	4.18	Yes	No	No	No
No	Mal	42	162	53	80	No	No	No	No	Yes	No	4	X	X	T4NXMX	Ⅲ	[cT4NxMxⅢ期]	No	No	No	No	No	No	No	No		Yes	No	No	No	No	0.84	7.31	4.58	238	5.23	160	44.22	77.5	11	23.9	3.07	0.2	0.1	4.25	Yes	No	No	No
Yes	Fem	83			50	No	Yes	No	Yes	No	Yes							Yes	No	No	No	Yes	No	No	No		No	No	No	No	No			9.1	196	1.97	54	32.51	71.3	12.8	21.8	3.08	11.9	3.9	2.66	Yes	No	No	No
No	Mal	74	163	64	80	No	No	No	No	Yes	Yes							No	No	Yes	No	Yes	No	Yes	No		No	No	Yes	No	No	1.84	8.09	3.15	258	4.34	137	39.73	68.8	11.6	26.7	2.87	1.2	0.48	4.8	Yes	No	No	No
No	Fem	52	159	54	90	No	No	No	No	Yes	No	is	0	0	TisN0M0			No	No	No	No	No	No	No	No		No	No	No	No	No	0.93	30.16	5.69	151	4.3	123	48.21	46.1	10.9	26.6	2.35	1	0.1		Yes	No	No	No
No	Mal	63	168	64	90	No	No	No	No	Yes	Yes	1	0	0	T1N0M0	Ⅰ	[pT1aN0M0ⅠA期]	No	No	No	No	No	No	No	No		No	No	Yes	No	No	1.24	15.75	3.54	100	4.5	144	43.83	72	11.3	26.2	2.53	1.2	0.41	4.21	Yes	No	No	No
No	Mal	51	163	36	70	No	No	No	No	Yes	No							No	No	No	No	Yes	No	No	No		No	No	Yes	No	No	4.77	65.77	9.77	272	5.15	156	40.31	63	13	37.9	4.23	4.3	0.98	3.52	Yes	No	No	No
No	Mal	83			70	No	No	Yes	No	No	Yes							Yes	Yes	No	No	Yes	No	No	No		No	No	No	No	No	24.89	185.31	14.1	465	3.86	78	31.39	47.7	13	31.4	4.67	2.3	0.63	2.53	No	No	No	No
No	Mal	65	165	62	80	No	Yes	Yes	No	Yes	Yes	4	0	1	T4N0M1	Ⅱ		No	Yes	Yes	No	No	No	No	No		No	No	No	No	No	2	9.86	7.66	258	4.95	141	34.81	115.4	9.7	25.2	3.55	0.9	0.3	5.25	Yes	No	No	No
No	Fem	48	159	55	70	No	No	No	No	Yes	No	4	0	0	T4N0M0	Ⅱ	[PT4aN0M0ⅡB期]	No	No	Yes	No	Yes	No	No	No		Yes	No	Yes	No	No	<0.50	13.5	4.29	286	3.91	107	38.18	38	9.9	24.7	2.63	1.6	0.43	5.38	Yes	Yes	No	No
No	Mal	54	169	74	80	No	No	No	No	Yes	No	4	1	0	T4N1M0	Ⅲ	[T4aN1M0ⅢB期]	No	No	Yes	No	Yes	No	No	No		Yes	No	Yes	No	No	<0.50	7.13	4.68	170	4.31	129	40.2	67.1	11	26.7	3.76	2.6	0.68	3.45	No	Yes	No	No
No	Fem	59	160	62	80	No	No	No	Yes	Yes	Yes	4	2	1	T4N2M1	Ⅳ		No	No	No	No	No	No	No	No		No	No	Yes	No	No	4.38	9.21	5.37	139	4.06	123	45.85	48.4	12.6	23.8	3.07	3.2	0.93	4.26	Yes	No	No	No
No	Fem	58	157	36	80	No	No	No	No	Yes	Yes							No	Yes	No	No	Yes	No	No	No		No	No	No	No	No	<0.50	18.13	3.57	45	2.33	64	26.08	62	13	32.8	2.7	3.6	0.86	3.34	Yes	No	No	No
No	Mal	42	163	90	80	No	No	No	No	Yes	Yes	4	1	0	T4N1M0	Ⅲ	[pT4aN1M0IIIA期]	No	No	No	No	No	No	No	No		Yes	No	Yes	No	No	1.54	5.07	8.06	294	4.9	150	49.64	79.4	12.2	29.5	3.82	0.3	0.11	4.97	Yes	No	No	No
No	Mal	65	160	54	80	No	No	No	Yes	Yes	Yes	4	2	1	T4N2M1	Ⅳ		No	No	No	No	Yes	No	No	No		No	No	Yes	No	No	10.18	>700.00	4.37	540	3.93	87	33.36	64.7	11.3	25.7	4.94	6.2	1.38	4.25	Yes	No	No	No
No	Mal	53	175	72.5	80	No	No	No	No	Yes	No					Ⅳ		No	No	No	No	No	No	No	No		Yes	No	Yes	No	No	<0.50	10.09	6.6	170	4.84	145	41.19	77.2	11.8	33.3	2.84	0.9	0.18	3.76	No	Yes	No	No
No	Mal	51	171	62.5	70	No	Yes	No	No	Yes	Yes	4	X	1	T4NXM1	Ⅳ	[cT4bNxM1Ⅳ期]	No	No	No	No	Yes	No	No	No		No	No	Yes	No	No	6.9	14.73	11.62	569	2.36	66	36.04	69	12.9	27.6	5	7	1.85	3.35	Yes	No	No	No
No	Fem	48	164	61	70	No	No	No	No	Yes	Yes	4	3	0	T4N3M0	Ⅲ	[pT4aN3aM0Ⅲb期]	No	No	Yes	No	Yes	No	No	No		No	No	Yes	No	No	<0.50	23.4	5.54	373	4.39	124	41.2	45.4	9.7	27.8	3.42	0.6	0.1	5.05	Yes	No	No	No
No	Fem	49	154	47	100	No	No	No	No	Yes	No	2	0	0	T2N0M0	Ⅱ		No	No	No	No	No	No	No	No		No	No	No	No	No	2.21	32.54	6.24	202	3.43	115	47.75	43.7	12.8	30.8	2.15	7.4	1.82	4.3	Yes	No	No	No
No	Mal	77	165	72	80	No	No	No	No	No	Yes	4	1	0	T4N1M0	Ⅲ	[pT4N1M0ⅢA期]	No	Yes	Yes	No	Yes	No	No	No		Yes	No	Yes	No	No	1.9	8.83	4.54	136	3.36	108	35.39	84	12.9	29.4	2.16	1.6	0.34	2.78	Yes	No	No	No
Yes	Mal	63	168	70	90	No	No	No	No	Yes	Yes	2	2	0	T2N2M0	Ⅱ	[pT2N20IIB期]	Yes	No	No	No	No	No	No	No		No	No	Yes	No	Yes	2.29	6.25	5.85	200	4.93	167	48.22	79.4	10.4	23.3	2.6	1.1	0.1	5.7	Yes	No	No	No
No	Mal	57	168	52	70	No	No	No	No	Yes	Yes	4	X	0	T4NXM0	Ⅲ	[cT4N1M0III期]	No	No	No	No	Yes	No	No	No		No	No	No	No	No	0.66	7.74	5.98	268	3.67	73	40.84	68.9	11.2	25.6	2.8	2.2	0.43	4.15	No	No	No	No
No	Mal	53	162	62	90	No	No	No	No	Yes	No	2	2	0	T2N2M0	Ⅳ		No	No	No	No	No	No	No	No		No	No	No	No	No			4.6	261	4.27	146	41.35	67.8	9.9	24.7	2.88	1.1	0.2		Yes	No	No	No
No	Mal	67	164	55	80	No	No	No	No	Yes	No	4	2	0	T4N2M0	Ⅲ	[cT4N2M0IIIB期]	Yes	No	No	No	Yes	No	No	No		No	No	No	No	No	7.25	10401	3.14	167	3.53	81	40.85	60.3	13.5	24.5	2.26	25.2	8.52	2.81	Yes	Yes	No	No
No	Mal	74	155	65	90	No	No	No	No	Yes	No	3	2	0	T3N2M0	Ⅲ		No	No	No	No	No	No	No	No		Yes	No	No	No	No	2.13	26.62	5.45	433	3.26	91	38.38	63.6	12.1	25.4	3.13	1.4	0.33	3.91	No	No	No	No
No	Mal	81	165	41	80	No	Yes	No	No	Yes	No							No	No	No	No	No	No	No	No		No	No	No	No	No	3.6	188.73	6.77	251	4.02	125	36.52	69.7	11.3	21.9	3.71	6.7	1.55	5.27	Yes	No	No	No
Yes	Mal	54	170	76	90	No	No	No	No	Yes	Yes	1	0	0	T1N0M0	Ⅰ	[pT1N0M0IA期]	No	No	No	No	Yes	No	No	No		Yes	No	Yes	No	No	<0.50	7.53	10.27	419	5.36	161	50.87	72.3	12.2	25.6	4.18	1.9	0.33	5.64	Yes	No	No	No
No	Fem	84	145	45	70	No	Yes	No	Yes	Yes	No			1	M1	Ⅳ		No	No	No	No	No	No	No	No		No	No	No	No	No	1.73	25.11	7.73	259	4.53	135	43.34	60.6	10.2	19.7	3.18	1.6	0.29		No	No	No	No
No	Mal	60	155	45	80	No	Yes	Yes	No	Yes	No	4	2	1	T4N2M1	Ⅳ	[T4aN2M1IV期]	No	No	No	No	No	No	No	No		No	No	No	No	No	1.31	5.88	4.84	238	4.72	133	41.39	91.5	11.1	27.9	3.42	2.5	0.46	3.83	No	Yes	No	No
No	Mal	77	160	67	80	No	Yes	No	No	Yes	Yes							No	No	No	No	Yes	No	No	No		No	No	Yes	No	No	0.77	14.73	4.54	120	4.19	140	42.37	101.4	11	26.9	2.6	1.8	0.51	3.72	Yes	No	No	No
No	Fem	54	157	55	60	No	No	No	No	Yes	No	X	3	1	TXN3M1	Ⅳ	[Ⅳ期rTxN3M1]	No	No	No	No	No	No	No	No		Yes	No	Yes	No	Yes	2.9	269.52	3.32	240	3.34	101	39.11	53.7	11.4	20.3	5.12	11.8	3.8	1.7	Yes	Yes	No	No
Yes	Mal	74	162	58	80	No	Yes	No	No	Yes	Yes	4	3	0	T4N3M0	Ⅲ	[pT4aN3M0IIIC期]	No	No	No	No	Yes	No	No	No		Yes	No	Yes	No	No	80.85	9.17	3.33	172	3.78	107	43.66	67.3	12.4	25.6	2.87	1.2	0.3	3.34	Yes	No	No	No
No	Mal	78	168	54.5	80	No	No	No	No	Yes	Yes							No	No	No	No	Yes	No	No	No		Yes	No	No	No	No	2.59	23.2	8.1	371	3.11	79	36.92	83.6	12.5	29.6	4.23	3.4	0.69	4.07	No	No	No	No
No	Mal	79	168	53	80	No	No	No	No	Yes	No							No	No	Yes	No	No	No	No	No		Yes	No	Yes	No	No	0.59	19.71	4.56	164	3.84	110	35.05	84.6	12.4	27.9	2.92	3.2	0.54	2.95	Yes	Yes	No	No
No	Mal	58	159	55	90	No	No	No	No	Yes	Yes	3	3	0	T3N3M0	Ⅲ	[pT3N3aM0IIIb期]	Yes	No	No	No	No	No	No	No		No	No	Yes	No	No			4.4	218	3.94	122	48.29	81.3	9.9	29	2.32	0.3	0.1	4.65	Yes	No	No	No
No	Mal	78	170	74	80	No	Yes	No	No	Yes	No	2	1	0	T2N1M0	Ⅱ	[pT2N1M0IIA期]	No	No	No	No	No	No	No	No		No	No	No	No	No	3.15	11.17	4.71	236	4.35	143	45.22	84	10.3	23.5	3.18	2.5	0.55	3.77	No	No	No	No
No	Fem	55	154	69	70	No	No	No	No	Yes	Yes	3	1	1	T3N1M1	Ⅳ	[cT3N1M1IV期]	Yes	No	Yes	No	Yes	No	No	No		Yes	No	No	No	No	0.52	26.07	4.65	225	3.43	81	42.78	53.1	11.7	22.6	2.83	5.8	0.84	3.45	No	Yes	No	No
No	Mal	60	165	62	90	No	No	No	No	No	No							No	No	No	No	No	No	No	No		No	No	No	No	No	2.19	14.18	9.5	186	4.37	149	48.29	72.7	11.9	24.8	2.41	0.8	0.12	3.71	Yes	No	No	No
No	Fem	60	144	54	90	No	No	No	No	Yes	Yes	4	0	0	T4N0M0	Ⅱ	[pT4aN0M0IIb期]	No	No	No	No	Yes	No	No	No		Yes	No	Yes	No	No	0.52	9.11	5.78	143	3.82	111	50.57	50.8	11.8	25.9	2.6	2	0.39	4.9	Yes	No	No	No
No	Mal	52	166	69	80	No	No	No	No	Yes	No	3	0	1	T3N0M1	Ⅳ		No	No	No	No	Yes	No	No	No		Yes	No	No	No	No	41.21	211.07	6.87	204	4.72	144	43.79	73.8	12.1	32.8	4.37	9.3	1.77	3.89	Yes	No	No	No
No	Mal	58	163	50	90	No	No	No	No	Yes	Yes	4	0	0	T4N0M0	Ⅱ		No	Yes	Yes	No	Yes	No	No	No		Yes	No	Yes	No	No	4.37	14.13	4.2	248	3.09	83	41.1	78.9	11.8	24.8	2.68	1.1	0.09	4.09	Yes	No	No	No
No	Mal	63	167	69	80	No	No	No	No	Yes	Yes							No	No	No	No	Yes	No	No	No		No	No	Yes	No	No	1.66	12.75	4.1	169	4.68	152	66.3	66.7	10.3	25.8	2.84	2	0.42	4.85	Yes	No	No	No
No	Mal	71	160	67	80	No	Yes	No	No	Yes	Yes	4	2	0	T4N2M0	Ⅲ	[PT4N2M0IIIb期]	No	No	No	No	No	No	No	No		No	No	Yes	No	No	1.1	110.23	5.68	413	3.64	69	41.2	48.5	12.5	27.9	2.93	3	0.37	2.56	Yes	No	No	No
No	Fem	60	150	50	90	No	No	No	No	Yes	No	X	2	1	TXN2M1	Ⅳ	[cTxN2M1IV期]	No	No	No	No	No	No	No	No		No	No	No	No	No	1.41	14.94	5.26	156	3.65	113	35.2	60.9	12.1	29.2	3.29	3.1	0.56		No	No	No	No
No	Mal	71	170	58	80	No	Yes	No	No	Yes	Yes							Yes	No	No	No	Yes	No	No	No		No	No	No	No	No	0.58	6.61	5.53	388	1.95	53	35.94	58.9	12.8	28.2	3.71	1.4	0.27	2.8	No	No	No	No
No	Fem	67	150	47	80	No	No	No	No	No	No							No	No	No	No	No	No	No	No		Yes	No	No	No	No	<0.50	18.08	8.34	226	4.58	141	49.31	63.2	9.3	24.8	3.95	2.2	0.48	5.48	No	Yes	No	No
No	Fem	51	162	49	80	No	No	No	No	Yes	Yes	4	3	0	T4N3M0	Ⅲ	[pT4bN3bM0ⅢC期]	No	No	Yes	No	Yes	No	No	No		Yes	No	Yes	No	No	<0.50	14.75	3.81	126	3.86	108	37.55	48.1	10.3	28.8	1.96	4.5	0.97	3.51	Yes	No	No	No
No	Fem	43	155	51	80	No	No	No	No	Yes	Yes							No	No	No	No	No	No	No	No		No	No	Yes	No	No	<0.50	45.41	5.6	222	4.56	131	53.56	61.1	10.3	23.4	2.63	1	0.1		Yes	No	No	No
No	Fem	51	166	48	90	No	No	No	No	No	No							No	No	No	No	No	No	No	No		No	No	Yes	No	No	0.69	17.21	3.72	192	4.91	144	49.91	55.7	10.8	25	3.36	0.5	0.21	5.35	Yes	No	No	No
No	Fem	48	153	60	90	No	No	No	No	Yes	Yes	is	0	0	TisN0M0	Ⅰ		No	No	No	No	Yes	No	No	No		No	No	Yes	No	No	<0.50	15.41	6.67	161	3.84	121	46.1	45.1	12.3	27.2	2.58	0.9	0.25	5.45	Yes	No	No	No
No	Mal	60	162	61	80	No	No	No	No	Yes	No	2	0	0	T2N0M0	Ⅱ		No	No	No	No	No	No	No	No		No	No	No	No	No	47.62	227.74	6.45	321	3.5	111	39.14	69.1	10.3	25.5	2.6	2.2	0.42	4.64	Yes	No	No	No
No	Fem	57	149	37.5	70	No	No	No	No	Yes	No	4	3	1	T4N3M1	Ⅳ	[T4N3M1IV期]	No	No	Yes	No	No	No	No	No		Yes	No	Yes	No	No	7.76	>70000.00	9.6	230	4.54	122	46.4	36.8	13	27.4	3.54	6.2	1.42	4.73	Yes	Yes	No	No
Yes	Mal	76	165	71.5	80	No	No	No	No	Yes	Yes	1	0	0	T1N0M0	Ⅰ	[pT1bN0M0I期]	No	No	No	No	No	No	No	No		No	No	Yes	No	Yes	1.21	10.41	6.57	289	4.47	130	44.97	70	11.3	27.3	3.18	4	0.86	5.03	Yes	No	No	No
No	Mal	75	164	50	70	No	Yes	No	No	Yes	No	4	3	1	T4N3M1	Ⅳ	[T4N3M1IV期]	No	No	No	No	No	No	No	No		No	No	No	No	No	3.94	15.76	10.97	261	3.4	105	45.35	122.6	11.5	28.5	4.78	15.7	5.49	4.44	No	No	No	No
No	Mal	73	172	79	80	No	Yes	No	Yes	Yes	Yes	4	1	0	T4N1M0	Ⅲ	[pT4aN1M0ⅢA期]	No	No	No	No	Yes	No	No	No		Yes	No	No	No	No	1.25	61.24	3.68	207	3.75	96	38.03	67.1	11.4	23.6	2.35	0.8	0.1	3.79	Yes	No	No	No
Yes	Mal	72	162	71	80	No	Yes	No	No	No	No	4	0	0	T4N0M0	Ⅲ	[T4NxM0III期]	No	No	No	No	No	No	No	No		No	No	No	No	No	1.65	13.07	4.14	239	2.85	84	33.36	99.7	12.1	25.2	2.66	24.6	7.54	4.48	Yes	No	No	No
Yes	Mal	64	163	49	80	No	Yes	No	No	Yes	No	X	0	1	TXN0M1	Ⅳ	[cTxN0M1Ⅳ期]	No	Yes	No	No	No	No	No	No		No	No	No	No	No	2.49	12.01	5.58	175	4.92	146	46.65	51.7	10.3	20.3	4.07	1.6	0.37		No	No	No	No
No	Mal	51	161	63	70	No	No	No	No	Yes	No					Ⅳ		No	No	No	No	No	No	No	No		No	No	No	No	No	>100.00	171.9	10.02	325	4.69	140	46.21	63.7	10	21.9	3.84	26.7	8.07	3.67	No	No	No	No
No	Fem	64				No	No	No	No	Yes	No					Ⅳ		No	No	Yes	No	No	No	No	No		Yes	No	No	No	No															No	No	No	No
No	Fem	39	166	53	80	No	No	No	No	Yes	Yes	4	X	0	T4NXM0		[sT4bNxM0]	Yes	No	Yes	No	Yes	No	No	No		No	No	Yes	No	No	0.84	28.31	10.87	283	4.52	99	39.62	49	11.9	20.3	3.29	1.6	0.37	4.59	Yes	No	No	No
No	Fem	78	151	70	80	No	No	No	No	No	No							No	No	No	No	No	No	No	No		No	No	No	No	No	1.7	15.06	6.12	141	4.55	139	44.37	60.3	10.8	22.2	2.41	2.5	0.57	4.63	No	No	No	No
No	Fem	69	145	57	90	No	No	No	No	Yes	Yes							No	No	No	No	Yes	No	No	No		No	No	Yes	No	No	1.79	12.13	4.32	292	3.32	101	39.19	34.8	11.4	23.6	4.06	4.4	1.01		Yes	No	No	No
No	Mal	70	158	56	70	No	No	No	No	Yes	No	4	2	1	T4N2M1	Ⅳ		No	No	No	No	Yes	No	No	No		No	No	Yes	No	No	5.4	15.14	4.85	206	4.13	107	42.89	63	11.8	27.6	2.98	4.5	0.81	4.84	Yes	No	No	No
No	Mal	29	164	63	70	No	No	No	No	Yes	No	4	1	1	T4N1M1	Ⅳ	[cT4N1M1IV期]	No	No	No	No	No	No	No	No		No	No	No	No	No	1.31	634.71	7.89	443	3.55	75	38.49	66.6	13.9	31.7	4.1	18.2	6.02		No	No	No	No
Yes	Fem	72	155	61.5	70	No	No	No	No	Yes	No	4	3		T4N3	Ⅳ	[cT4N3M1Ⅳ期]	No	No	No	No	No	No	No	No		No	No	No	No	No	>100.00	>700.00	8.85	262	4.25	85	35.68	61	14.1	24.5	1.87	36.9	>10.00	4.18	No	No	No	No
No	Mal	63	143	53	70	No	No	No	No	Yes	Yes	2	0	0	T2N0M0	Ⅰ	[PT2N0M0Ib期]	No	No	No	No	No	No	No	No		Yes	No	Yes	No	No	1.96	10.15	6.18	245	5.14	157	48.1	70.6	12.4	37.1	2.64	0.8	0.11	5.3	Yes	No	No	No
No	Mal	48	184	66	70	No	No	No	No	Yes	Yes							No	No	No	No	Yes	No	Yes	No		No	No	Yes	No	No	1.81	9.15	5.4	193	4.09	126	36.11	59	10.9	32	3.24	3.2	0.79		Yes	No	No	No
No	Mal	65	170	72	80	No	No	No	No	No	No	3	0	0	T3N0M0	Ⅱ		No	No	No	No	No	No	No	No		No	No	No	No	No	0.97	14.05	4.9	217	4.22	129	40.69	70.8	10.7	23.3	5.12	1.4	0.22	4.37	No	No	No	No
Yes	Mal	68	155	51	95	No	No	No	No	Yes	Yes	3	2	0	T3N2M0	Ⅲ		No	No	No	No	No	No	No	No		No	No	Yes	No	No	0.9		5.53	143	4.33	128	35.74	72.3	10.6	20.4	2.75	1.9	0.49	4.89	Yes	No	No	No
No	Mal	59	155	65	90	No	No	No	No	Yes	Yes	4	0	0	T4N0M0	Ⅱ		No	No	No	No	No	No	No	No		Yes	No	Yes	No	No	<0.50	4.93	4.83	204	4.86	153	52.02	71.3	10.4	19.7	3.35	0.8	0.16	8.02	Yes	No	No	No
No	Mal	54	163	67	80	No	No	No	No	Yes	No	3	2	0	T3N2M0	Ⅲ	[pT3N2M0ⅢB期]	No	No	Yes	No	No	No	No	No		Yes	No	No	No	No	17.58	6.38	3.92	195	4.5	137	44.56	92.5	13.1	22.7	1.98	4.8	0.96		Yes	Yes	No	No
No	Fem	62	133	37	70	No	No	No	No	No	No							No	No	No	No	No	No	No	No		No	No	Yes	No	No	0.68		3.16	130	4.56	141	45.89	49	10.2	22.4	2.05	0.7	0.13		Yes	No	No	No
No	Mal	69	164	50	70	No	Yes	No	No	Yes	No	4	1		T4N1	Ⅲ		No	No	Yes	No	Yes	No	No	No		No	No	No	No	No	1.78	440.05	5.86	391	3.84	116	39.39	69.4	10.5	21.8	3.42	4.9	1.16	4.78	No	No	No	No
No	Mal	73	172	80	90	No	No	No	No	Yes	No	4	3	1	T4N3M1	Ⅳ	[cT4N3M1Ⅳ期]	No	No	No	No	No	No	No	No		Yes	No	No	No	No	20.1	9.89	6.9	249	4.08	123	34.1	90.5	10.2	20.7	3.42	21.5	6.7		Yes	Yes	No	No
No	Mal	53	170	44	70	No	No	No	No	Yes	No							Yes	No	No	No	No	No	Yes	No		No	No	No	No	No	1.91	1067.1	3.63	188	3.71	124	45	65.3	11.9	23.2	2.32	2.6	0.67	3.83	Yes	No	No	No
No	Mal	73	151	61	90	No	No	No	No	No	No							No	No	No	No	No	No	No	No		No	No	Yes	No	No	0.8	12.61	3.59	118	3.77	129	46.83	52.1	12.4	30.7	2.55	0.6	0.06	3.73	Yes	No	No	No
No	Mal	68	1.58	43	80	No	No	No	No	Yes	No	4	3	0	T4N3M0	Ⅲ		No	No	No	No	Yes	No	No	No		Yes	No	No	No	No	4.69	18.69	4.4	157	3.16	93	37.21	68.3	11.8	23.2	3.3	2.2	0.54	3.36	No	Yes	No	No
No	Mal	68	174	68	70	No	Yes	Yes	No	No	No	3	1	0	T3N1M0	Ⅱ	[cT3N1M0II期]	No	No	No	No	No	No	No	No		Yes	No	No	No	No	1.17	1.3	8.1	181	4.67	147	42.41	53.6	11.4	25.3	3.69	11.1	2.73	4.31	Yes	Yes	No	No
No	Mal	66	170	60	70	No	No	No	No	No	Yes	2	1	0	T2N1M0	Ⅱ		Yes	No	No	No	Yes	No	No	No		No	No	No	No	No	8.27	7.16	18.38	513	3.56	76	29.5	60.6	16.6	32.3	4.51	13.5	2.6	1.99	No	No	No	No
No	Mal	49	158	55	80	No	No	No	No	Yes	No					Ⅳ		No	No	No	No	Yes	No	No	No		No	No	No	No	No	<0.50	7.78	6.87	316	2.86	81	28.12	58.3	12.5	30.9	3.29	10.4	2.44	2.59	No	No	No	No
No	Mal	52	168	80	80	No	No	No	No	Yes	No							No	No	No	No	No	No	No	No		No	No	No	No	No															No	No	No	No
No	Fem	44	159	52	90	No	No	No	No	Yes	No	3	0	0	T3N0M0	Ⅱ	[T3N0M0IIa期]	No	No	No	No	No	No	No	No		No	No	No	No	No	<0.50	4.55	4.8	256	4.48	135	49.17	55	12.8	26.9	3.07	0.2	0.06		Yes	No	No	No
No	Fem	77	144	50	80	No	Yes	No	No	Yes	No	X	X	X	TXNXMX			No	No	No	No	No	No	No	No		No	No	No	No	No	3.19	6.81	4.98	215	3.66	119	42.97	49.2	閲嶆娊					5.38	No	No	No	No
No	Fem	49	163	67	90	No	No	No	No	No	No							No	No	No	No	No	No	No	No		No	No	Yes	No	No	1.7	<1.20	5.12	139	3.99	120	48.42	47.6	12.5	28.9	2.98	1.2	0.22	5.41	Yes	No	No	No
No	Mal	54	173	67	80	No	Yes	No	No	Yes	Yes	2	1	0	T2N1M0	Ⅲ		No	No	No	No	No	No	No	No		No	No	Yes	No	Yes	0.56		5.87	174	4.63	143	37.37	83.6	10.1	21.4	2.39	1.6	0.13		Yes	No	No	No
No	Mal	41	167	65	80	No	No	No	No	Yes	No							No	No	No	No	No	No	Yes	No		Yes	No	No	No	No	<0.50	224.2	12.62	398	4.12	117	36.8	70.2	14.3	41.9	4.32	8	2.06		No	Yes	No	No
No	Mal	56	163	66	70	No	No	No	No	Yes	No	4	2	1	T4N2M1	Ⅳ	[cT4N2M1]	No	No	No	No	Yes	No	No	No		No	No	No	No	No	1.52	1.2	12.1	593	3.02	76	36.59	93.9	11.3	33.3	5.31	3.1	0.58		No	No	No	No
No	Fem	62	140	61	90	No	No	No	No	Yes	No	4	2	1	T4N2M1	Ⅳ		No	No	No	No	No	No	No	No		No	No	No	No	No	<0.50	6.53	7.95	314	4.82	139	47.67	84.5	12.9	29.5	5.18	3.1	0.66	5.83	Yes	No	No	No
No	Mal	53	165	66	80	No	No	No	No	Yes	No							No	No	No	No	Yes	No	No	No		Yes	No	No	No	No	1.78	5.72	3.7	182	4.64	115	45.9	41.5	13.4	29.9	2.98	2.3	0.49		No	Yes	No	No
No	Fem	45	160	53	70	No	No	No	No	Yes	No	3	3	1	T3N3M1	Ⅳ	[T3N3M1Ⅳ期]	Yes	Yes	Yes	No	Yes	No	No	No		Yes	No	No	No	No	6.77	484.52	5.74	276	4.09	94	41.09	63.6	10.7	23.3	4.94	10.6	2.55	4.85	Yes	Yes	No	No
No	Mal	65	168	64	90	No	No	No	No	Yes	No	X	1	1	TXN1M1	Ⅳ	[TxN1M1Ⅳ期]	Yes	Yes	No	No	Yes	No	No	No		No	No	No	No	No	40.83	5.54	7.84	157	3.88	92	36.44	77.3	14.2	31	3.68	14.3	3.36	3.19	Yes	No	No	No
No	Mal	31	171	59	90	No	No	No	No	Yes	No	4	3	0	T4N3M0	Ⅲ	[T4bN3aM0ⅢC期]	No	No	No	No	Yes	No	Yes	No		No	Yes	Yes	No	No	0.52	26.59	4.37	340	4.03	101	48.06	65.8	10.2	17.1	2.29	3.2	0.55	4.63	No	Yes	No	No
No	Fem	62	1.51	55	80	No	No	No	No	Yes	No	3	2	0	T3N2M0	Ⅲ	[pT3N2M0ⅢA期]	No	No	No	No	No	No	No	No		Yes	No	No	No	No	0.7	17.44	4.33	151	3.54	119	45.05	29.9	12.3	29.3	3.03	0.8	0.15	4.87	No	Yes	No	No
No	Mal	71	152	74	70	No	Yes	No	No	No	Yes							No	No	No	No	Yes	No	No	No		Yes	No	Yes	No	No	0.93	10.53	1.84	239	2.95	53	30.5	65.4	12.9	22.5	3.48	10.5	3.27	3.84	No	No	No	No
No	Fem	51	145	36	70	No	No	No	No	Yes	No	X	X	1	TXNXM1	Ⅳ	[rTxNxM1IV期]	No	No	No	No	Yes	No	No	No		No	No	No	No	No	5.48	11.77	5.8	303	3.7	112	42.4	43.1	11.3	21.7	1.68	5.7	1.49		No	No	No	No
No	Mal	52	162	20	80	No	No	No	No	Yes	Yes	3	2	0	T3N2M0	Ⅲ		No	No	Yes	No	Yes	No	No	No		No	No	Yes	No	No	1.07	8.15	6.88	226	4.19	134	38.52	64.7	10.1	20.8	2.88	1.4	0.28	4.04	Yes	No	No	No
No	Mal	69	162	62	70	No	No	Yes	No	Yes	No	X	X	1	TXNXM1	Ⅳ		No	No	Yes	No	Yes	No	Yes	No		No	No	No	No	No	630.9	64.5	5.57	194	4.43	130	41.98	62.8	10.7	20.7	4.62	3.1	0.76		No	No	No	No
No	Mal	69	169	62	80	No	No	No	No	Yes	No	4	2	1	T4N2M1	Ⅳ	[T4N2M1IV期]	No	No	Yes	No	No	No	No	No		Yes	No	No	No	No	1.82	11.58	3.56	225	3.42	101	41.27	60.9	13.6	34.3	2.16	5.8	1.4	2.86	Yes	Yes	No	No
No	Mal	77	155	49	80	No	Yes	No	No	Yes	No	3	1	0	T3N1M0	Ⅱ	[cT3N1M0IIB期]	No	Yes	No	No	Yes	No	No	No		Yes	No	Yes	No	No	2.05	12.26	8.23	171	3.74	115	37.97	123.2	11.4	23.6	2.93	2.7	0.68		No	Yes	No	No
No	Mal	69	166	78	80	No	Yes	No	Yes	No	No							No	No	No	No	No	No	No	No		No	No	Yes	No	No	2.39	11.84	6.42	195	5.64	173	51.05	84.6	13.4	34.1	3.41	1.7	0.37	4.52	Yes	No	No	No
No	Mal	62	164	61	90	No	No	No	No	Yes	Yes	3	1	0	T3N1M0	Ⅱ	[pT3N1M0IIb期]	No	Yes	No	No	Yes	No	No	No		Yes	No	Yes	No	No	1.7	4.92	4.1	225	4.27	132	43.13	77.2	12.9	31.6	3.41	0.9	0.16	3.81	Yes	No	No	No
No	Mal	67	169	55	90	No	No	No	No	Yes	Yes	3	0	0	T3N0M0	Ⅱ	[pT3N0M0ⅡA期]	No	Yes	Yes	No	Yes	No	No	No		Yes	No	Yes	No	No	1.3	12.63	3.67	170	4.07	115	42.9	54	9.6	22.5	3.35	2	0.52	3.86	Yes	No	No	No
No	Mal	59	170	65	70	No	Yes	No	No	Yes	No	X	X	0	TXNXM0	Ⅳ	[rT3N0M1IV期]	No	No	Yes	No	Yes	No	No	No		Yes	No	Yes	No	No	20.2	426.53	3.67	146	3.5	105	39.27	98.1	10	21.8	3.35	4.9	1.13		No	Yes	No	No
No	Mal	60	170	65	70	No	Yes	No	No	Yes	Yes	3	2	1	T3N2M1	Ⅳ		No	Yes	No	No	Yes	No	No	No		No	No	No	No	No	0.87	10.73	10.24	343	2.45	73	33.22	73.8	13.3	35.9	5.72	4.3	1.14	3.33	No	No	No	No
No	Mal	68	176	66	80	No	No	No	No	Yes	No	X	X	1	TXNXM1	Ⅳ		No	No	No	No	No	No	No	No		No	No	No	No	No	4.27	5.71	4.64	172	3.28	126	40.73	67.1	10.7	19.6	3.48	2.5	0.56		No	No	No	No
No	Fem	37	150	45	80	No	No	No	No	No	No							No	No	No	No	Yes	No	No	No		No	No	No	No	No	1.58	18.65	3.04	91	3.07	103	41.85	66.3	10.2	21.2	2.52	5.3	1.07		No	No	No	No
No	Mal	50	166	71	70	No	No	No	No	Yes	No	X	X	1	TXNXM1	Ⅳ		No	No	Yes	No	No	No	No	No		No	No	No	No	No	177.8	275.7	6.3	166	4.44	145	43.04	67.8	12.2	27.1	4.06	2.2	0.69	6.27	Yes	No	No	No
No	Mal	43				No	No	No	No	Yes	No	4	3	0	T4N3M0	Ⅳ	[T4aN3M0ⅢC期]	No	No	No	No	No	No	No	No		Yes	No	No	No	No	70.66	62725	5.17	131	3.98	134	47.72	58.6	14.8	27.4	2.84	15.7	3.27		No	Yes	No	No
No	Mal	62				No	No	No	No	Yes	No	2	0	0	T2N0M0	Ⅱ		No	No	No	No	No	No	No	No		No	No	No	No	No	2.9		3.7	242	4.08	118		73.8							No	No	No	No
No	Mal	66	170	60	60	No	No	No	No	Yes	No	X	X	1	TXNXM1	Ⅳ		No	No	No	No	Yes	No	No	No		No	No	Yes	No	No	5.63	6.79	7.54	194	5.35	159	41.1	61.5	13	21.8	3.36	28.2	7.54		Yes	No	No	No
No	Mal	67	161	60	70	No	Yes	No	Yes	No	Yes							Yes	No	No	No	Yes	No	No	No		No	No	No	No	No	>100.00	<1.20	10.92	382	2.5	66	27.57	84.3	12	26.8	5.87	5.3	1.96	3.17	No	No	No	No
No	Mal	74	158	41	80	No	No	Yes	No	Yes	No							No	No	No	No	No	No	No	No		No	No	No	No	No	18.08	113.14	3.32	119	2.55	99	31.67	61.9	17	34.4	2.53	71.9	>10.00		No	No	No	No
No	Fem	52	160	52	90	No	No	No	No	Yes	Yes	4	2	0	T4N2M0	Ⅲ	[pT4bN2M0IIIC期]	No	No	Yes	No	Yes	No	No	No		No	No	Yes	No	No	<0.50	17.66	3.06	408	3.9	86	40.74	51.8	13	34.8	3.61	1.4	0.22	4.45	Yes	No	No	No
No	Mal	65	162	56	70	No	Yes	Yes	No	No	No							No	No	No	No	No	No	No	No		No	No	Yes	No	No	1.03	7.16	4.26	225	5.17	101	45.76	58.4	16.7	31.1	2.98	0.9	0.23	3.03	No	No	No	No
Yes	Mal	55	170	80	50	No	No	No	No	Yes	No	3	2	1	T3N2M1	Ⅳ	[cT3N2M1Ⅳ期]	No	No	No	No	No	No	No	No		No	No	No	No	No	11.51	6.73	7.25	227	3.72	115	32.1	68.1	15.6	28.5	3.08	101.6	>10.00		No	No	No	No
No	Mal	59	160	55	80	No	No	No	No	Yes	No	4	X	0	T4NXM0	Ⅱ	[cT4NxM0II期]	No	No	No	No	Yes	No	No	No		No	No	No	No	No	15.52	20.96	4.13	222	3.8	115	40.01	65.7	10.9	26.7	2.51	0	0.16	3.03	Yes	No	No	No
No	Mal	63			80	No	No	No	No	Yes	No	X	1	1	TXN1M1	Ⅳ		No	No	No	No	No	No	No	No		No	No	No	No	No	8.34	>700.00	5.59	158	4.45	122	41.47	47.3	13.6	31.4	1.92	2.5	0.47		No	No	No	No
No	Mal	71	160	50	80	No	No	No	No	Yes	No	3	1	0	T3N1M0	Ⅲ		No	No	Yes	No	Yes	No	No	No		Yes	No	Yes	No	No	0.61	16.43	5.72	184	4.25	108	39.09	82	11.5	31.1	2.52	3.2	0.4		No	Yes	No	No
No	Mal	77	158	58	80	No	No	No	No	No	No							No	No	No	No	Yes	No	No	No		No	No	No	No	No	<0.50	10.64	8.05	472	3.67	107	39.11	112.8	13.5	34	5.37	19.1	4.46	5.55	No	No	No	No
No	Fem	69	150	53	90	No	No	No	No	Yes	Yes	4	1	0	T4N1M0	Ⅲ	[pT4bN1M0III期]	No	Yes	No	No	Yes	No	No	No		No	No	Yes	No	No	0.85	12.69	2.75	167	3.53	90	38.56	62.8	10.5	30.1	2.39	4.8	1.37	4.83	Yes	No	No	No
No	Fem	75	143	40	80	No	No	No	No	No	No							No	No	No	No	Yes	No	No	No		No	No	No	No	No	1.11	5.54	5.45	103	2.72	85	40.92	58.1	11.6	28	2.79	2.3	0.68		Yes	No	No	No
No	Mal	72	169	60	80	No	No	No	No	Yes	No	3	1	0	T3N1M0	Ⅲ		No	No	Yes	No	No	No	No	No		Yes	No	No	No	No			4.6	125	4.15	134	43.24	77	10.8	21.7	2.32	0.9	0.13	3.57	Yes	Yes	No	No
No	Mal	60	165	49	90	No	No	No	No	Yes	Yes	4	1	0	T4N1M0	Ⅲ	[cT4N1M0ⅢB期]	No	No	No	No	No	No	No	No		No	No	Yes	No	No	0.97		5.08	264	3.52	104	38.17	74.6	11	29.9	5.36	2.6	0.74	3.14	Yes	No	No	No
No	Mal	68	165	50	70	No	No	No	No	No	No	4	X	X	T4NXMX		[cT4NxMx]	Yes	No	No	No	Yes	No	No	No		No	No	No	No	No			3.39	327	2.99	80	36.38	85.2	12.9	32.7	3.35	9.8	2.56	4.03	No	No	No	No
No	Mal	58	159	51	80	No	No	No	No	Yes	Yes	1	0	0	T1N0M0	Ⅰ	[pT1NOMOI期]	No	No	No	No	Yes	No	No	No	Yes	No	No	Yes	No	No	1.28	13.71	5.07	435	3.64	80	19.54	75.1	11	22.9	6.53	1.7	0.51	3.03	Yes	No	No	No
No	Mal	74	162	66	80	No	No	No	No	Yes	Yes							No	No	No	No	No	No	No	No		Yes	No	No	No	No	1.55	16.17	5.7	226	4.32	140	47.67	78.5	11.5	29.4	3.07	1.4	0.45	4.53	No	No	No	No
No	Mal	54	169	58	80	No	No	No	No	Yes	No							No	No	No	No	No	No	No	No		No	No	No	No	No	3.12	165.21	10.47	139	3.72	131	44.7	78.1	11.7	29.5	3.24	7.5	1.86	4.49	No	No	No	No
No	Mal	67	160	68	80	No	No	No	No	No	Yes	4	3	0	T4N3M0	Ⅲ	[cT4bN3M0ⅢC期]	No	Yes	No	No	Yes	No	No	No		No	No	No	No	No	6.17	9.87	8.54	489	2.12	46	26.45	56.5	13.6	42.3	3.86	6.8	1.49	2.72	Yes	No	No	No
No	Mal	53			50	No	Yes	No	No	Yes	No	X	X	1	TXNXM1	Ⅳ	[TxNxM1IV期]	No	Yes	No	No	No	No	No	No		No	No	Yes	No	No	1.8	205.45	13.57	183	4.14	125	36.74	94.9	13.3	26.6	4.94	16.4	5.25	1.1	Yes	Yes	No	No
No	Mal	58	178	60	60	No	Yes	No	Yes	Yes	No	3	2	1	T3N2M1	Ⅳ	[rT3N2M1]	No	Yes	No	No	No	No	No	No		No	No	No	No	No	1.24	38.89	8.17	394	3.24	99	32.26	38.5	11.7	29.2	4.78	16.9	6.96	3.36	No	Yes	No	No
No	Fem	62	150	50.5	80	No	No	No	No	Yes	No							No	No	No	No	Yes	No	No	No		No	No	No	No	No	8.19	36.76	4.78	112	3.47	104	44.26	68.6	13.6	28.4	4.1	2.3	0.63	6.26	Yes	No	No	No
No	Mal	72	160	45	70	No	No	No	No	Yes	No	X	X	1	TXNXM1	Ⅳ	[TxNxM1IV期]	No	No	No	No	Yes	No	No	No		Yes	No	Yes	No	No	18.1	>700.00	11.47	381	4.75	94	37.95	119	15	30.6	5.37	13.1	3.58	3.47	Yes	Yes	No	No
No	Fem	71	1.55	50	70	No	Yes	No	Yes	Yes	No	X	X	1	TXNXM1	Ⅳ		No	No	No	No	No	No	No	No		No	No	No	No	No	<0.50	18.5	3.91	253	3.74	109	34.04	61.6						2.26	Yes	No	No	No
No	Mal	44	160	49	90	No	No	No	No	Yes	No	4	3	0	T4N3M0	Ⅲ	[ypT4aN3bM0IIIc期]	No	No	Yes	No	Yes	No	No	No		Yes	No	Yes	No	No	3.17	31.45	2.99	155	3.13	88	34.73	51	14.1	27.2	2.32	8	1.97	4.99	No	Yes	No	No
No	Fem	49				No	No	No	No	Yes	No					Ⅳ		No	No	No	No	No	No	No	No		No	No	No	No	No															No	No	No	No
No	Fem	62	150	60	70	No	Yes	No	No	Yes	No	2	3	1	T2N3M1	Ⅳ		No	No	No	No	Yes	No	No	No		Yes	No	Yes	No	No	1.49	11.68	6.92	331	4.77	115	43.54	58.6	11.7	25	4.18	1.2	0.34	5.43	No	Yes	No	No
No	Mal	52	171	65	90	No	No	No	No	No	No					Ⅳ		No	No	No	No	No	No	No	No		No	No	No	No	No	1.64	9.51	3.48	210	3.94	132	45.2	93.5	13.3	26.6	1.65	2.2	0.27	2.89	No	No	No	No
No	Mal	66	157	53	70	No	No	No	No	Yes	No	4	3	1	T4N3M1	Ⅳ	[T4N3M1IV期]	No	No	No	No	No	No	No	No		Yes	No	No	No	No	188.1	5424.1	5.89	196	3.89	110	34.68	60.1	11.5	24.8	4.07	31	>10.00	6.8	Yes	Yes	No	No
No	Mal	63	160	60	80	No	No	No	No	Yes	No	3	1	0	T3N1M0	Ⅲ	[TisN0M00期]	No	No	Yes	No	No	No	No	No		No	No	Yes	No	No	1.51	24.16	2.51	143	4.95	155	48.24	65.9	11.3	27.4	3.07	1.4	0.4		Yes	No	No	No
No	Mal	76	163	51	80	No	No	No	No	Yes	Yes	4	2	0	T4N2M0	Ⅲ	[pT4bN2M0ⅢC期]	No	Yes	No	No	Yes	No	No	No		Yes	No	Yes	No	No	1.09	14.78	5.49	193	4.69	141	35.76	95.5	12.3	27.7	3.42	5.3	1.38	4.26	Yes	No	No	No
No	Mal	53	158	75	70	No	No	No	No	No	Yes							No	No	No	No	Yes	No	Yes	No		No	No	Yes	No	No	<0.50	8.85	5.9	163	3.13	87	32.34	53.4	12.2	36	5.1	57.1	>10.00	4.34	Yes	No	No	No
No	Mal	64	176	60	80	No	No	No	No	Yes	No	4	2	0	T4N2M0	Ⅲ	[PT4aN2M0IIIA期]	No	No	No	No	No	No	No	No		No	No	No	No	No	5.64	3.57	6.22	374	4.05	124	44.24	67.8	10.2	25.1	2.93	2.6	0.18	4.96	No	No	No	No
No	Mal	43	169	54	90	No	No	No	No	Yes	No	4	1	0	T4N1M0	Ⅳ	[cT4N1M0Ⅳ期]	No	No	No	No	No	No	No	No		No	No	No	No	No	3.53	>700.00	5.76	186	4.74	149	51.33	67.1	11.1	27.6	2.83	0.7	0.13	4.09	Yes	No	No	No
No	Mal	60	140	45	80	No	Yes	No	Yes	Yes	No	X	X	1	TXNXM1	Ⅳ	[TxNxM1IV期]	Yes	Yes	Yes	No	Yes	No	No	No		Yes	No	No	No	Yes	6.19	4.59	4.27	210	3.17	81	34.43	57.4	12.3	29	2.43	0.5	0.25	4.01	No	Yes	No	No
No	Mal	62	160	46	60	No	No	No	No	Yes	Yes	X	X	1	TXNXM1	Ⅳ	[cTxNxM1Ⅳ期]	No	No	No	No	No	No	No	No		Yes	No	No	No	No	2.05	143.79	12.3	307	2.83	73	39.41	84	15	34.6	3.86	6.8	1.45	3.2	No	No	No	No
No	Fem	68	145	43.5	80	No	Yes	No	No	Yes	No	1	2	1	T1N2M1	Ⅳ	[T1N2M1Ⅳ期]	No	No	No	No	No	No	No	No		No	No	No	No	No	1.08	27.99	7.62	195	4.82	137	45.98	58	12.5	26.9	2.72	6.3	1.67	4.96	No	No	No	No
No	Mal	63	170	61	80	No	No	No	No	Yes	No	4	3	1	T4N3M1	Ⅳ	[T4aN3M1IV期]	No	No	No	No	No	No	No	No		No	No	No	No	No	6.76	5.51	6.35	256	4.07	122	36.39	71.4	13.4	32.1	3.35	1.4	0.22		No	No	No	No
No	Mal	59	165	69	80	No	No	No	No	Yes	Yes	4	1	0	T4N1M0	Ⅲ	[pT4N1M0Ⅲ期]	No	No	Yes	No	No	No	Yes	No		No	No	Yes	No	No	1.78	25.38	4.66	159	5.38	165	51.68	71.9	11.8	26.2	2.1	0.2	0.06	5.42	Yes	No	No	No
No	Mal	49	168	73	80	No	No	No	No	Yes	Yes	2	0	0	T2N0M0	Ⅰ	[PT2N0M0Ib期]	No	No	No	No	No	No	No	No		Yes	No	Yes	No	No	<0.50	11.56	4.64	215	5.54	147	48.15	84.5	10.1	20	2.67	0.7	0.1	3.68	Yes	No	No	No
No	Fem	47	162	58	80	No	No	No	No	Yes	Yes							No	No	No	No	Yes	No	No	No		Yes	No	Yes	No	No	0.99	91.13	4.29	213	3.9	114	41.68	47.4	11	24.3	3.13	3.7	1.1	4.94	Yes	No	No	No
No	Mal	68	152	55	80	No	No	No	No	Yes	Yes	3	X	0	T3NXM0	Ⅱ	[cT3NxM0Ⅱ期]	No	No	No	No	No	No	No	No		No	No	No	No	No	2.49	7.85	4.81	203	4.62	138	41.99	60.4	11	32.3	3.24	1.4	0.36	4.65	Yes	No	No	No
No	Fem	60	151	43	80	No	No	No	No	Yes	Yes	3	2	0	T3N2M0	Ⅲ		No	No	Yes	No	Yes	No	No	No		No	No	Yes	No	No	<0.50	38.47	12.84	177	3.78	100	46.02	54.1	14.6	29.7	2.41	2.8	0.52	3.78	Yes	No	No	No
No	Mal	75			20	No	No	No	No	Yes	No							No	Yes	No	No	No	No	Yes	No		No	No	No	No	No	38.5	17.54	15.16	324	3.63	90	26.09	65.1	17.9	35.7	2.5	70.1	>10.00	1.73	No	No	No	No
No	Mal	86			30	No	Yes	No	No	Yes	Yes	3	1	0	T3N1M0			No	No	No	No	No	No	No	No		No	No	Yes	No	No	2.67	74.77	7.58	207	3.18	101	30.99	43.4	14.5	35.2	2.84	7.7	2.39	2.73	Yes	No	No	No
No	Fem	43	155	58	80	No	No	No	No	No	Yes	X		1	TXM1			No	No	No	No	No	No	No	No		No	No	Yes	No	No	<0.50	21.03	14.42	165	3.94	129	35.68	75.2	11.9	26.2	2.74	4.8	1.31	3.62	Yes	No	No	No
No	Mal	68	167	57	80	No	No	No	No	Yes	Yes					Ⅳ		No	No	No	No	No	No	No	No		Yes	No	No	No	No	1.02	14.48	6.6	205	4.72	137	47.66	77	11.2	22.4	3.3	2.7	0.75		No	No	No	No
No	Mal	63	160	50.5	80	No	No	No	No	Yes	No	3	1	0	T3N1M0	Ⅲ		No	Yes	No	No	No	No	No	No		No	No	No	No	No	4.23	23.3	6.81	182	4.19	132	42.06	62.1	11	29.9	4.94	1.1	0.32	4.74	No	No	No	No
No	Mal	43	165	55	50	No	No	No	No	Yes	No	4	X	1	T4NXM1	Ⅳ		No	No	No	No	No	No	No	No		No	No	No	No	No			7.47	162	4.18	133	29.63	126.3	16.1	38.1	1.13	85.5	>10.00		No	No	No	No
No	Mal	45	165	59	80	No	No	No	No	No	No							No	No	No	No	No	No	No	No		No	No	Yes	No	No			7.04	221	5.09	166	47.43	75.7	10.5	20.8	2.45	1.1	0.16	4.61	Yes	No	No	No
No	Mal	51	165	63	50	No	No	No	No	Yes	No	4	3	1	T4N3M1	Ⅳ	[T4aN3M1IV期]	No	No	No	No	No	No	Yes	No		No	No	No	No	No	25.33	6170.5	9.45	222	3.28	97	32.02	522.8	13.8	25	3.18	31.6	9.8	3.88	Yes	No	No	No
No	Mal	49	168	62	70	No	No	No	No	Yes	No	4	3	1	T4N3M1	Ⅳ	[cT4bN3M1]	No	No	No	No	Yes	No	No	No		No	No	Yes	No	No	>100.00	21.3	7.61	417	3.62	76	40.31	45.3	10.9	20.6	4.33	4	1.06		No	No	No	No
No	Mal	68	163	55.5	90	No	No	No	No	Yes	Yes	4	3	0	T4N3M0	Ⅲ	[pT4aN3M0IIIc期]	No	No	Yes	No	Yes	No	No	No		Yes	No	Yes	No	No	2.15	14.65	4.46	209	4.29	132	42.66	78.7	13.1	29.5	4.18	1.9	0.48	5.16	Yes	No	No	No
No	Mal	50	175	56	80	No	No	No	No	Yes	Yes	4	3	0	T4N3M0	Ⅲ		No	No	No	No	No	No	No	No		No	No	Yes	No	No	1.1	4.52	6.44	193	4.61	139	41.83	72.2	11.3	27.5	3.3	2.2	0.56	3.92	Yes	No	No	No
No	Mal	69	164	60	70	No	No	Yes	No	Yes	Yes	4	3	1	T4N3M1	Ⅳ	[pT4N3M1Ⅳ期]	No	No	No	No	Yes	No	No	No		No	No	Yes	No	No	1.32	17.82	4.12	107	4.07	118	42.77	87.3	12.4	29.6	2.78	1.9	0.53	2.98	Yes	No	No	No
No	Mal	54	180	65.5	90	No	No	No	No	No	No							No	No	No	No	No	No	No	No		No	No	Yes	No	No	1.5	13.87	4.79	111	3.99	133	48.46	86.8	11.8	30.8	2.51	1.5	0.5	5.44	Yes	No	No	No
No	Fem	60	158	47	90	No	No	No	No	No	No	1	0	0	T1N0M0			No	No	No	No	No	No	No	No		No	No	No	No	No	0.52	17.71	4.29	172	4.69	142	52.23	47.5	11	24.3	2.2	1	0.15	4.99	Yes	No	No	No
No	Mal	67	158	48	80	No	No	No	No	Yes	No							No	No	No	No	No	No	No	No		Yes	No	No	No	No	7.38	34.92	4.56	223	4.38	134	44.43	68.3	10.3	22.3	4.07	1.8	0.39		No	Yes	No	No
No	Mal	62	165	61	80	No	No	No	Yes	Yes	No							No	No	No	No	No	No	No	No		No	No	No	No	No	1.14	12.54	8.21	225	4.36	128	41.11	74.6	10.7	23.9	2.45	3.2	0.38	4.11	Yes	No	No	No
No	Mal	66	168	70	80	No	No	No	No	Yes	Yes	1	0	0	T1N0M0	Ⅰ	[pT1bN0M0IA期]	No	No	No	No	Yes	No	No	No		Yes	No	Yes	No	No	1.22	8.94	5.1	272	4.07	138	53.4	78.2	12.4	27.1	2.6	0.8	0.13	4.07	Yes	No	No	No
No	Mal	65	165	68	80	No	No	No	No	Yes	No							No	No	No	No	No	No	No	No		No	No	Yes	No	No	60.47	10.73	5.22	154	5.34	151	43.16	77.7	11.3	26.3	2.97	1.4	0.62	3.94	No	No	No	No
No	Mal	51	170	63	90	No	Yes	No	No	Yes	Yes	2	0	0	T2N0M0	Ⅰ	[pT2N0M0Ib期]	Yes	No	No	No	Yes	No	No	No		Yes	No	Yes	No	No	3.74	8.49	7.83	380	2.3	64	40.73	62.4	10.3	22.7	3.84	1.1	0.42		Yes	No	No	No
Yes	Mal	58	151	56	80	No	Yes	No	No	No	Yes							No	No	No	No	No	No	No	No		No	No	Yes	No	No	<0.50	7.88	5.62	271	2.85	74	38.66	79	10.7	17.6	2.67	18.9	8.87	3.25	Yes	No	No	No
No	Mal	60	168	55	80	No	No	No	No	Yes	No	4	3	0	T4N3M0	Ⅲ	[T4N3aM0ⅢC期]	No	No	Yes	No	Yes	No	Yes	No		No	No	No	No	No	1.26	14.75	5.17	215	4.78	138	43.92	63.9	11.3	26.2	2.43	1.4	0.4	3.88	Yes	No	No	No
No	Mal	63	170	67	80	No	No	No	No	No	No	2	0	0	T2N0M0	Ⅰ	[cT2N0M0IB期]	No	No	No	No	No	No	No	No		No	No	Yes	No	No	1	26.32	5.47	155	4.48	150	39.58	64.2	17.7	32.5	2.29	0.2	0.07	5.63	Yes	No	No	No
No	Fem	49	162	54	90	No	No	No	No	Yes	No					Ⅳ		No	No	No	No	No	No	No	No		No	No	Yes	No	No	1.72	5.23	5.99	361	4.11	125	35.1	43.4	12.2	28	2.57	3.6	0.92	4.95	Yes	No	No	No
Yes	Fem	57			70	No	No	No	No	Yes	Yes							Yes	No	No	No	Yes	No	No	No		No	No	No	No	No	2	24.84	6.36	170	2.59	55	29.2	50.8	13	27.5	2.51	28.1	9.15	2.86	Yes	No	No	No
No	Fem	72	160	64	80	No	No	No	No	No	Yes							No	No	No	No	Yes	No	No	No		No	No	Yes	No	No	0.69	5.53	7.9	420	2.07	50	30.66	47.7	12.3	23.1	2.74	4.4	1.13	3.41	Yes	No	No	No
No	Mal	82	167	50	90	No	Yes	No	No	Yes	No	2	0	0	T2N0M0	Ⅱ		No	No	No	No	Yes	No	No	No		No	No	Yes	No	No	1.81	9.62	5.04	190	2.95	88	32	78.5	10.3	20.8	3.13	3.1	0.85	4.01	Yes	No	No	No
No	Fem	70	150	50.5	80	No	Yes	No	Yes	Yes	No	1	0	0	T1N0M0	Ⅰ	[T1N0M0ⅠA期]	No	No	No	No	Yes	No	No	No		No	No	Yes	No	No	1.81	23.66	5.02	119	3.23	91	42.48	131.2	11.5	23.6	3.42	4.4	1.08	3.8	No	No	No	No
No	Fem	57	156	50	70	No	No	No	Yes	Yes	No	X	X	1	TXNXM1	Ⅳ		No	No	No	No	Yes	No	No	No		No	No	No	No	No	78.39	178.55	5.03	221	3.29	92	37.19	58.4	9.9	20.8	4.47	24.7	>10.00		No	No	No	No
Yes	Mal	63	171	70	70	No	No	No	No	Yes	No	X	X	1	TXNXM1	Ⅳ	[ycTxNxM1]	No	No	No	No	No	No	No	No		Yes	No	No	No	No	14.03	19.78	16.56	339	4.31	132	38.94	116.3	12	22.2	5.31	37	>10.00	4.07	Yes	No	No	No
No	Fem	60	157	40	90	No	No	No	No	Yes	Yes	2	0	0	T2N0M0	Ⅰ	[pT2N0M0ⅠB期]	No	Yes	No	No	Yes	No	No	No		Yes	No	Yes	No	No	2.26	4.34	4.56	377	4.78	108	46.86	57.7	9.5	21.3	3.18	3.2	0.91	3.91	Yes	No	No	No
No	Mal	64	159	59	80	No	No	No	No	Yes	Yes	4	2	0	T4N2M0	Ⅲ	[pT4N2bM0Ⅳ期]	No	No	No	No	No	No	No	No		No	No	Yes	No	No	2.66	7.93	5.54	211	4.77	142	41.87	58.9	9.4	22.5	5.12	0.7	0.22	4.68	Yes	No	No	No
No	Mal	79	153	44.5	70	No	No	No	No	Yes	Yes							No	No	No	No	Yes	No	No	No		No	No	No	No	No	1.4	44.31	8.08	268	2.61	68	26.23	58.9	12.6	25.3	3.49	5.6	1.32	3.57	No	No	No	No
No	Fem	65	160	50	80	No	Yes	No	No	Yes	No	4	2	0	T4N2M0	Ⅲ	[T4N2M0ⅢC期]	No	Yes	No	No	No	No	Yes	No		Yes	No	No	No	No	1.63	1457.8	4.59	132	4.37	135	32.52	50.1	10.4	21.4	2.67	6.9	2.26	2.35	No	Yes	No	No
No	Fem	65	158	72	80	No	Yes	No	No	Yes	No							No	No	No	No	No	No	No	No		No	No	No	No	No	<0.50	7.98	5.58	182	4.36	126	42.24	72.8	10.6	20.3	3.07	1.1	0.22	4.82	Yes	No	No	No
No	Mal	63	158	55.5	70	No	No	No	No	Yes	No	2	0	0	T2N0M0	Ⅰ	[T2N0M0Ib期]	Yes	No	No	No	No	No	No	No		No	No	No	No	No	1.25	8.37	5.21	185	3.75	119	40.8	57.7	11.8	26.5	2.74	0.3	0.23		No	No	No	No
No	Mal	55	180	57.5	90	No	No	No	No	Yes	Yes	3	3	0	T3N3M0	Ⅳ		No	No	Yes	No	No	No	No	No		No	No	Yes	No	No	<0.50	57.43	5.83	178	5.58	176	47.81	62.8	10.2	23.3	3.42	1	0.1	4.24	Yes	No	No	No
No	Fem	63	168	61	90	No	No	No	Yes	No	No							No	No	No	No	Yes	No	No	No		No	No	No	No	No	3.45	>700.00	4.11	180	3.88	116	42.33	107.9	13.6	24.7	1.54	22	5.36	8.22	No	No	No	No
No	Mal	66	162	66	80	No	Yes	No	No	Yes	No	4	0	0	T4N0M0	Ⅱ	[cT4N0M0]	No	No	No	No	No	No	No	No		Yes	No	No	No	No	168.9	10.26	7.39	163	5.05	154	46.55	73	9.6	21.5	3.69	1.5	0.4	5.37	No	No	No	No
No	Fem	49	158	32	50	No	No	No	No	Yes	No							No	No	No	No	No	No	Yes	No		No	No	No	No	No			9.56	473	4.2	111	38.18	19.7	13.4	29	4.23	8.9	2.91		No	Yes	No	No
No	Mal	56	165	48	70	No	No	No	No	Yes	Yes							No	No	No	No	Yes	No	Yes	No		No	No	Yes	No	No	1.32	16.47	10.16	149	4.71	144	45.69	54.2	10.2	22.8	4.47	1.5	0.36		Yes	No	No	No
No	Mal	66	167	58	80	No	No	No	No	Yes	No	3	3	0	T3N3M0	Ⅲ	[T3N2M0IIIC期]	No	No	No	No	Yes	No	Yes	No		Yes	No	Yes	No	No	1.91	29.24	7.02	558	4.3	98	35.31	70.1	11	27.8	4.33	6.5	2.58		No	Yes	No	No
No	Mal	49	160	54	90	No	No	No	No	Yes	No	4	3	0	T4N3M0	Ⅲ	[T4bN3M0IIIC期]	No	No	No	No	No	No	No	No		No	No	Yes	No	No	2.56	23.72	4.42	94	3.9	126	36.25	65.7	10.9	26	3.18	2	0.56		Yes	No	No	No
No	Mal	66	170	62	90	No	No	Yes	No	Yes	No	4	0	1	T4N0M1	Ⅳ	[cT4N0M1IV期]	No	No	No	No	No	No	No	No		No	No	No	No	No	7.92	8.12	5.26	255	3.61	109	35.11	67	12.3	33.2	3.63	21.9	4.73	1.98	Yes	No	No	No
No	Mal	63	167	56	80	No	No	No	No	Yes	Yes							No	No	No	No	Yes	No	No	No		No	No	No	No	No	0.5	4.79	7.67	273	2.1	66	38.51	100.2	13.7	38.3	3.43	103.5	>10.00	2.73	No	No	No	No
No	Mal	67	167	57	70	No	No	No	No	No	No							No	No	No	No	No	No	No	No		No	No	Yes	No	No	26.17	>700.00	5.03	204	3.9	118	35.33	80.9	14	39.9	4.51	13.9	4.04	4.71	No	No	No	No
No	Mal	73	160	44	70	No	No	No	No	Yes	No	4	1	0	T4N1M0	Ⅲ		No	Yes	No	No	No	No	No	No		No	No	No	No	No	7.35	9.7	7.95	331	3.81	120	35.5	51.5	11.9	26.6	4.32	2.2	0.55	4.25	Yes	No	No	No
No	Mal	55			60	No	No	No	No	Yes	Yes	4	X	1	T4NXM1	Ⅳ	[pT4bNxM1IV期]	Yes	No	No	No	Yes	No	No	No		No	No	No	No	No			10.67	287	1.35	41	28.99	75.1	13.5	25.9	3.23	3.9	0.91	3.05	No	No	No	No
No	Mal	46	172	79	80	No	No	No	No	Yes	No	X	2	X	TXN2MX		[TxN2Mx]	No	No	No	No	No	No	No	No		No	No	No	No	No															No	No	No	No
No	Mal	72	167	45	70	No	No	No	No	Yes	No							Yes	Yes	No	No	Yes	No	No	No		No	No	No	No	No	87.53	2.67	4.74	248	3.82	85	37.15	70.1	12.4	24.4	4.2	7.5	6.04	3.46	Yes	No	No	No
No	Mal	62	155	46	70	No	No	No	No	Yes	No	X	X	1	TXNXM1	Ⅳ	[TxNxM1IV期]	No	Yes	No	No	No	No	No	No		Yes	No	No	No	No	1.73	33.32	6.53	326	3.13	88	25.14	66.6							No	Yes	No	No
No	Fem	43	165	61	90	No	No	No	No	No	No							No	No	No	No	No	No	No	No		No	No	Yes	No	No			6.99	265	4.4	133	46.19	51.2	11.6	28.8	2.1	0.3	0.12	4.29	Yes	No	No	No
Yes	Mal	80	165	52	80	No	No	No	No	Yes	Yes	4	0	0	T4N0M0	Ⅱ	[pT4N0M0Ⅱ期]	No	No	No	No	Yes	No	Yes	No		No	No	Yes	No	Yes	<0.50	7.03	4.15	213	4.24	137	39.13	68	12.1	33	2.66	0.75	0.2	3.28	Yes	No	No	No
No	Fem	46	160	61	80	No	No	No	No	Yes	No	X	X	1	TXNXM1	Ⅳ	[cT4N3M1Ⅳ期]	No	No	Yes	No	Yes	No	No	No		Yes	No	Yes	No	No	<0.50	15.98	3.7	224	3.82	102	41.29	51.9	12.5	23.5	3.13	11.8	3.42	5.07	Yes	No	No	No
No	Fem	69	154	54	90	No	No	No	No	Yes	Yes	2	0	0	T2N0M0	Ⅰ		No	No	No	No	No	No	No	No		No	No	Yes	No	No	2.55	7.04	4.15	120	4.2	127	39.03	66.6	11	18.5	3.76	1.7	0.33	4.2	Yes	No	No	No
No	Mal	74	160	58	70	No	Yes	No	No	Yes	No							No	Yes	No	No	No	No	No	No		No	No	No	No	No	>100.00	659.02	8.36	307	3.71	109	35.37	88	11.9	25.8	2.83	10.8	3.18		Yes	No	No	No
No	Mal	74	170	50	90	No	No	No	No	No	No							No	No	No	No	No	No	No	No		No	No	No	No	No	3.42	13.95	5.31	287	4.07	131	45.42	57.9	12.9	30.3	4.83	4.2	0.93	4.57	No	No	No	No
No	Mal	63	165	70	90	No	No	No	No	Yes	No							No	No	No	No	No	No	No	No		No	No	No	No	No	1.03	260.87	7.27	284	5.35	156	45.65	65.3	10.2	24.3	3.48	4.5	1.33	3.43	No	No	No	No
No	Mal	76	154	47.5	70	No	Yes	No	No	Yes	Yes							No	Yes	No	No	Yes	No	No	No		No	No	No	No	No	1.93	4.08	10.38	260	1.55	41	21.6	91.5	14.8	35.6	2.8	4.8	1.01	2.49	No	No	No	No
No	Mal	47	163	45	90	No	No	No	No	Yes	No	4	X	1	T4NXM1	Ⅳ	[cT4NxM1IV期]	No	No	No	No	No	No	Yes	No		No	No	No	No	No	<0.50	7.47	8.54	490	4.3	106	37.9	56.2	11.6	28.3	5.62	6.3	1.88	3.42	Yes	No	No	No
No	Fem	60	157	67	80	No	No	No	No	Yes	No	X	0	0	TXN0M0		[cTxN0M0]	Yes	Yes	Yes	No	Yes	No	No	No		No	No	No	No	No	<0.50	5.22	4.72	160	2.56	77	40.61	44.5	13	24.3	2.12	0.6	0.11	3.9	Yes	No	No	No
No	Fem	62	145	69	90	No	No	No	No	Yes	No							No	No	No	No	No	No	No	No		No	No	No	No	No			5.11	252	4.06	119	42.13	56.3	11.2	20.8	6.2	2.8	0.89	5.13	Yes	No	No	No
No	Mal	65	170	61	70	No	Yes	No	Yes	Yes	Yes					Ⅳ		No	Yes	Yes	No	Yes	No	No	No		No	No	Yes	No	No	<0.50	4.49	14.13	389	2.92	84	28.28	105.1	13.7	31.2	5	22.6	4.52	3.51	Yes	No	No	No
No	Mal	54	163	44	90	No	No	No	No	Yes	Yes	4	3	0	T4N3M0	Ⅲ		Yes	No	No	No	Yes	No	No	No		No	No	No	No	No	5.34	2.47	7.66	276	2.77	81	33.59	71.8							No	No	No	No
No	Mal	42	174	75	90	No	Yes	No	No	No	No							No	No	No	No	No	No	No	No		No	No	Yes	No	No	<0.50	7.42	5.52	231	5.44	159	51.6	74.3	12.4	30.5	2.28	1.2	0.31	3.96	Yes	No	No	No
No	Mal	65	158	58	90	No	No	No	No	Yes	Yes	3	3	0	T3N3M0		[pT3N3M0C]	Yes	Yes	No	No	No	No	No	No		No	No	Yes	No	Yes	3.49	72.73	7.07	228	4.41	137	37.85	70.9	10.1	25.3	3.55	0.9	0.47	4.75	Yes	No	No	No
No	Mal	43	162	68	80	No	No	No	No	Yes	Yes	X	X	1	TXNXM1	Ⅳ		Yes	Yes	No	No	Yes	No	No	No		No	No	No	No	No	<0.50	1189.5	11.63	243	4.12	122	39.45	70	14.5	41.5	3.47	4.2	0.88	3.37	Yes	No	No	No
No	Fem	62	155	51.5	80	No	No	No	No	Yes	No	1	2	0	T1N2M0	Ⅰ	[pT1bN2M0I期]	No	No	Yes	No	Yes	No	No	No		Yes	No	Yes	No	No	0.94	6.72	3.67	177	3.34	107	43.46	47.5	12.2	28.7	2.83	1	0.35	4.74	Yes	No	No	No
No	Fem	73	164	68	90	No	Yes	No	No	Yes	Yes	4	1	0	T4N1M0	Ⅲ	[pT4bN1bM0ⅢC期]	No	No	Yes	No	Yes	No	No	No		Yes	No	Yes	No	No	8.61	4.81	5.95	280	3.96	136	45.95	55	12.4	25.5	3.41	3.1	0.93	5.57	Yes	No	No	No
No	Mal	64	164	77	90	No	Yes	No	Yes	Yes	Yes	3	X	0	T3NXM0	Ⅲ	[cT3NXMO]	No	No	No	No	No	No	No	No		Yes	No	No	No	No	2.74	19.26	7.12	229	4.3	140	43.81	99.3	9.9	22.9	5.62	2.8	1.17	4.6	Yes	Yes	No	No
No	Mal	59	150	41	70	No	No	No	No	Yes	No	4	3	0	T4N3M0	Ⅲ	[T4N3M0Ⅲc期]	No	No	No	No	Yes	No	No	No		No	No	No	No	No	1371	106.8	3.75	188	3.07	72	32.5	72.6	11.2	25.2	3.55	1.9	0.65	4.05	No	No	No	No
No	Mal	55	168	61	70	No	No	No	No	Yes	No	2	1	0	T2N1M0	Ⅱ	[pT2N1M0IIB期]	No	No	Yes	No	No	No	No	No		Yes	No	Yes	No	No	0.57	4.42	4.98	154	3.8	122	44.84	66.1	12.3	20.8	2.79	7.4	2.73		No	Yes	No	No
No	Mal	83			60	No	Yes	No	Yes	No	No	4	X	X	T4NXMX	Ⅳ		Yes	No	No	No	Yes	No	No	No		No	No	No	No	No	4.93	12.25	5.48	145	3.23	96	39.76	52.7	13.3	28.7	1.01	19.5	3.65	3.55	No	No	No	No
No	Mal	83	163	49	60	No	No	No	No	Yes	No	3	X	X	T3NXMX		[cT3NxMx]	No	No	No	No	No	No	No	No		No	No	No	No	No	0.65	13.15	2.42	275	2.82	92	27.88	55.9	11.6	28.9	2.54	2.1	0.47		Yes	No	No	No
No	Fem	68	150	44	80	No	No	No	Yes	Yes	No	4	3	0	T4N3M0	Ⅲ	[pT4aN3aM0Ⅲc期]	Yes	No	Yes	No	Yes	No	No	No		Yes	No	Yes	No	No	1.83	6.66	3.87	145	3.72	109	39.86	58.6	12.5	27.3	2.8	5.5	1.12		No	Yes	No	No
No	Mal	79	140	50	60	No	No	No	No	Yes	No	X	X	1	TXNXM1	Ⅳ	[T4bNxM1Ⅳ期]	No	No	No	No	No	No	No	No		No	No	No	No	No	3.44		7.12	69	3.83	123	36.09	46.6	14.1	28.7	4.03	7.5	1.12		Yes	No	No	No
No	Mal	67	170	57	70	No	Yes	No	Yes	Yes	No	4	X	1	T4NXM1	Ⅳ		No	No	No	No	Yes	No	Yes	No		No	No	No	No	No	6.95	>700.00	12.98	254	3.72	100	33.54	55.7	12	31.7	4.78	3.9	0.94		Yes	No	No	No
No	Mal	61	166	70	80	No	No	No	No	Yes	Yes	4	1	0	T4N1M0	Ⅲ	[pT4aN1M0]	No	No	No	No	No	No	Yes	No		No	No	Yes	No	No	2.18	47.73	6.45	267	4.43	142	41.33	85.1	11.7	27.8	3.18	2.5	0.42	3.66	Yes	No	No	No
No	Mal	64	165	57	80	No	No	No	No	No	No					Ⅱ		No	No	No	No	No	No	No	No		No	No	No	No	No			3.62	357	3.44	107	34.21	49.3	11.1	23.5	2.76	2.1	0.47		No	No	No	No
No	Mal	43	174	76	70	No	No	No	No	Yes	No	4	X	1	T4NXM1	Ⅳ	[cT4NxM1Ⅳ期]	No	No	Yes	No	No	No	No	No		Yes	No	Yes	No	No	>100.00	13.2	13.06	115	4.56	147	41.52	91.6	13.9	26.7	1.04	15.4	3.83		Yes	No	No	No
No	Mal	63	171	54	90	No	No	No	No	Yes	Yes	3	0	0	T3N0M0	Ⅱ	[cT3N0M0]	Yes	No	No	No	No	No	No	No		No	No	No	No	No	2.25	10.15	2.4	84	3.15	79	37.9	56	13.3	27.7	1.44	1	0.21	2.77	Yes	No	No	No
No	Mal	67	158	52	90	No	No	No	No	Yes	No	4	1	1	T4N1M1	Ⅳ	[T4N1M1IV期G3]	No	No	Yes	No	Yes	No	No	No		Yes	No	No	No	No	3.53	11.65	5.21	175	4.23	135	44.04	49.6	13.5	22.3	3.02	1	0.23	4.06	Yes	Yes	No	No
Yes	Fem	71			60	No	No	No	No	Yes	No	X	X	1	TXNXM1	Ⅳ		Yes	No	No	No	Yes	No	Yes	No		No	No	No	No	No			9.25	114	2.73	71	23.72	48.2	12.3	28.5	2.23	17.7	5.77		No	No	No	No
No	Mal	68	168	46	80	No	No	No	No	Yes	No	X	X		TXNX			No	No	No	No	No	No	No	No		No	No	Yes	No	No	1551	27293	8.03	243	4.95	152	43.8	68.9	11.2	29.6	4.18	10.6	3.2	4.69	Yes	No	No	No
No	Mal	54	160	54	90	No	No	No	No	Yes	No	2	3	0	T2N3M0	Ⅲ		No	No	No	No	No	No	No	No		No	No	Yes	No	No	94.8		5.52	208	3	91	40.65	41.8	10.2	25.5	3.35	6.5	2.1	5.13	Yes	No	No	No
No	Mal	76	152	60	80	No	No	No	No	Yes	No							Yes	No	No	No	No	No	No	No		No	No	No	No	No	0.61	14.72	6.12	225	4.49	134	37.62	68.6	10.2	23.6	2.79	3.6	0.76	3.45	No	No	No	No
No	Fem	44	145	46	80	No	No	No	No	Yes	No							No	No	Yes	No	Yes	No	No	No		Yes	No	Yes	No	No	82.42	5.85	3.59	253	3.76	101	38.02	61.8	11.2	23.9	4.61	5.7	1.39		Yes	Yes	No	No
No	Mal	56			20	No	No	No	No	Yes	Yes	4	3	1	T4N3M1	Ⅳ		No	Yes	No	No	Yes	No	No	No		No	No	Yes	No	No	9.29	>700.00	26.71	406	1.76	57	26.81	205.1	15.5	35.6	5.18	7.8	1.33	1.87	Yes	No	No	No
No	Fem	48	159	50		No	No	No	No	No	No							No	No	No	No	No	No	No	No		No	No	No	No	No			4.64	193	4.59	102	46.22	78.8	9.8	26.6	2.45	1.4	0.12		Yes	No	No	No
No	Mal	45	172	66	80	No	No	No	No	Yes	No					Ⅰ		Yes	No	Yes	No	No	No	No	No		No	No	No	No	No	<0.50	10.42	5.37	146	4.95	144	47.44	76.9	10.8	25	2.15	1.1	0.33	5.34	Yes	No	No	No
No	Mal	67	170	48	70	No	No	No	No	Yes	No	4	X	1	T4NXM1	Ⅳ		No	No	No	No	No	No	No	No		No	No	No	No	No	6.16	16.6	6.14	233	4.83	138	46.47	51	11.3	28.7	4.94	1.9	0.4		No	No	No	No
No	Mal	49	164	53.5	80	No	No	No	No	Yes	Yes	4	0	0	T4N0M0	Ⅱ		No	No	Yes	No	Yes	No	No	No		Yes	No	Yes	No	No	5.06	14.97	7.02	314	4.66	154	53.05	81.1	12.5	25.6	3.41	0.9	0.12	5.21	Yes	No	No	No
No	Mal	78	155	54	70	No	No	No	No	Yes	No	4	X	1	T4NXM1	Ⅳ	[T4NXM1IV期]	No	No	No	No	Yes	No	No	No		No	No	No	No	No	130.8	7.11	6.84	134	3.44	111	39.85	71.2	13.9	30.4	3.68	5.7	1.14		Yes	No	No	No
No	Fem	42	158	80	80	No	Yes	No	No	Yes	No	1	1	0	T1N1M0	Ⅰ		No	No	No	No	Yes	No	No	No		No	No	Yes	No	No	<0.50	6.25	6.97	313	5.04	96	49.82	59	11.1	22.4	2.82	0.5	0.12	3.76	Yes	No	No	No
No	Mal	65	165	44	80	No	Yes	No	No	Yes	No	3	0	0	T3N0M0	Ⅱ	[pT3N0M0II期]	No	No	No	No	No	No	No	No		No	No	No	No	No	0.86	10.12	5.31	165	4.69	142	55.95	69.6	12.1	27.7	2.13	0.7	0.21	4.61	Yes	No	No	No
No	Mal	57	166	63	80	No	No	No	No	Yes	Yes	4	1	0	T4N1M0	Ⅲ		No	No	Yes	No	Yes	No	No	No		No	No	Yes	No	No	1.6	13.48	5.24	188	4.77	160	49.3	60.1	10.9	28.7	2.59	2.8	0.14	5.1	Yes	No	No	No
No	Mal	45	172	61	70	No	No	No	No	Yes	No	4	0	0	T4N0M0	Ⅱ	[pT4N0M0IIB期]	No	No	Yes	No	No	No	No	No		Yes	No	No	No	No	<0.50	21.99	4.48	136	5.47	125	44.99	77.8	11.8	29.8	2.47	1.9	0.56		No	Yes	No	No
No	Fem	79	160	50	100	No	No	No	No	No	No							No	Yes	No	No	No	No	No	No		No	No	Yes	No	No	1.34	14.54	7.53	233	4.52	138	49.65	88.3	10.7	23.4	2.77	2.1	0.17	6.34	Yes	No	No	No
No	Fem	53	155	43	80	No	No	No	No	Yes	Yes	4	3	1	T4N3M1	Ⅳ	[pT4N3aM1]	No	No	No	No	Yes	No	Yes	No		Yes	No	Yes	No	No	<0.50	14.02	3.64	225	3.58	102	35.65	66.2	12.8	25.2	3.24	3.1	1.98	3.52	Yes	No	No	No
No	Mal	82	155	47	70	No	No	No	No	Yes	Yes	4	X	1	T4NXM1	Ⅳ		No	No	Yes	No	Yes	No	No	No		Yes	No	Yes	No	No	13.27	235.43	4.89	162	2.95	51	36.03	99.5	12.3	27.1	2.66	3.4	0.91	3.14	Yes	Yes	No	No
No	Mal	68	162	49	80	No	No	No	No	Yes	No							No	No	No	No	Yes	No	No	No		Yes	No	No	No	No	4.09	28.3	3.91	109	3.83	111	31.39	68.6	13.3	32.8	2.31	63.8	>10.00	3.84	No	Yes	No	No
No	Mal	68	166	51	80	No	No	No	No	Yes	No					Ⅳ		No	No	No	No	No	No	No	No		No	No	No	No	No	3.05	17.6	7.32	340	4.96	149	32.3	64.3							Yes	No	No	No
No	Fem	73	143	55	90	No	Yes	No	Yes	Yes	No	2	1	0	T2N1M0	Ⅲ		No	No	No	No	Yes	No	No	No		No	No	No	No	No	>100.00	11.3	6.39	307	3.08	69	36.87	86	11.7	28.9	5.38	13.5	3.07	3.23	Yes	No	No	No
No	Mal	72	162	57	70	No	No	No	No	Yes	No	2	0	0	T2N0M0	Ⅰ	[T2N0M0IB期]	No	No	No	No	No	No	No	No		Yes	No	Yes	No	No	<0.50	13.92	4.18	159	4.02	125	46.8	56.7	12.3	25	2.72	1.9	0.84	4.98	Yes	Yes	No	No
No	Mal	46	155	44	80	No	No	No	No	Yes	No	4	3	1	T4N3M1	Ⅳ	[cT4bN3M1ⅣB期]	No	No	Yes	No	Yes	No	No	No		Yes	No	No	No	No	2.96	163.01	9.54	282	4.19	111	38.54	66.7	14.7	33.9	3.75	6.9	1.6	4.29	Yes	Yes	No	No
No	Mal	52	172	65	80	No	No	No	No	Yes	Yes	1	0	0	T1N0M0	Ⅰ	[pT1aN0M0]	No	No	No	No	No	No	No	No		No	No	Yes	No	No	1.01	18.94	6.57	222	4.71	148	42.27	77.3	10.2	26.3	2.17	1	0.25		Yes	No	No	No
No	Mal	75	170	70.5	80	No	Yes	No	No	Yes	Yes	3	1	0	T3N1M0	Ⅲ	[pT3N1M0ⅢB期]	No	No	Yes	No	No	No	No	No		No	No	Yes	No	No	11.06	5.9	5.99	205	5.58	166	41.26	78.7	10.9	24.5	3.83	1.6	0.56	4.16	Yes	No	No	No
No	Mal	74	155	45	80	No	Yes	Yes	No	No	No	3	1	0	T3N1M0	Ⅲ		No	No	No	No	No	No	No	No		Yes	No	No	No	No	1.11	50.87	5.58	179	2.8	94	32.94	53.3	13.3	30.5	2.67	5.4	1.43	3.05	No	No	No	No
No	Mal	68	160	56.5	70	No	No	No	No	Yes	No	4	X	0	T4NXM0	Ⅱ		No	No	No	No	No	No	No	No		No	No	No	No	No	1.44	12.33	5.21	176	4.25	130	39.05	70.4	16.6	31.6	2.41	0.8	0.18	3.46	No	No	No	No
No	Mal	65	175	84	80	No	Yes	No	No	Yes	No	X	X	0	TXNXM0		[cTxNxM0]	No	No	No	No	No	No	No	No		No	No	No	No	No	0.72	17.37	5.36	135	5.37	151	44.75	68	12.5	29.3	3.24	0.8	0.18	4.56	Yes	No	No	No
No	Mal	65	155	57	80	No	No	No	No	Yes	No					Ⅲ		No	No	Yes	No	No	No	Yes	No		No	No	No	No	No	1.8	11.2	2.97	52	4.3	130	36.15	52.1	11.6	27.4	3.08	<2.50	0.44		No	No	No	No
No	Mal	48			70	No	No	No	No	Yes	No	3	0	X	T3N0MX	Ⅱ	[IIA期pT3N0Mx]	No	No	Yes	No	No	No	No	No		Yes	No	Yes	No	No	0.73	12.65	6.56	234	4.1	97	45.1	51.2	13.2	26.7	3.73	1.99	0.77	3.1	No	Yes	No	No
No	Mal	63	149	36	70	No	No	Yes	No	Yes	No	3	2	X	T3N2MX	Ⅲ		No	No	No	No	Yes	No	No	No		No	No	No	No	No	0.73	7.09	3.88	111	3.16	77	37.61	54.7	11.4	32.2	3.83	3.1	0.85		Yes	No	No	No
No	Mal	55	164	49		No	No	No	No	Yes	No	3	1	1	T3N1M1	Ⅳ		No	Yes	Yes	No	No	No	No	No		No	No	No	No	No	1.11	15.05	6.45	198	3.91	128	41.27	59	11.9	28.3	3.83	1.5	0.28	3.13	No	No	No	No
No	Mal	60	158	50	80	No	No	No	No	Yes	Yes	4	3	0	T4N3M0	Ⅲ	[pT4aN3aM0ⅢBc期]	No	No	Yes	No	Yes	No	No	No		No	No	Yes	No	No	2.43	34.43	5.99	169	4.11	130	41.98	75.3	12.2	27.4	3.31	1.1	0.19	3.08	Yes	No	No	No
No	Mal	69	165	51	70	No	No	No	No	Yes	No							No	No	No	No	Yes	No	No	No		No	No	No	No	No	1.23	16.59	4.23	202	2.7	77	33.45	88.9	12.5	36.4	4.26	3.1	0.74	3.24	Yes	No	No	No
No	Mal	76	169	49	80	No	Yes	No	No	No	No							No	No	No	No	No	No	No	No		Yes	No	No	No	No	3.57	1880.2	4.2	217	4.4	111	37.84	77.8	11.8	32.5	3.37	3.3	0.92	2.57	No	Yes	No	No
Yes	Mal	63	164	50	70	No	No	No	No	Yes	Yes	4	3	1	T4N3M1	Ⅳ	[cT4bN3M1Ⅳ期]	Yes	No	No	No	Yes	No	No	No		No	No	Yes	No	No	46.75	17.47	6.02	316	2.82	72	40.72	73.8	12.6	29.2	2.2	16.7	9.99		Yes	No	No	No
No	Mal	51	170	75	80	No	Yes	No	No	Yes	No							No	No	No	No	Yes	No	No	No		No	No	No	No	No	1.11	10.7	5.2	154	4.99	111	43.79	77.4	11.3	29.8	2.63	1.5	0.34		Yes	No	No	No
No	Mal	55	168	63	90	No	No	No	No	Yes	No							No	No	No	No	No	No	No	No		No	No	No	No	No	3.32	8.13	7.52	387	4.34	105	37.1	47.6	11.2	31	3.37	1	0.18	2.84	No	No	No	No
No	Mal	63	171		80	No	No	No	No	Yes	No	tis						No	Yes	No	No	No	No	No	No		No	No	No	No	No	1.19	10.75	6.45	236	4.54	138	41	55.7	9.3	27.5	2.69	<2.50	0.19	5.3	Yes	No	No	No
No	Mal	72	160	44	70	No	No	No	No	Yes	No	2	0	0	T2N0M0	Ⅰ	[cT2N0M0IB期]	No	No	No	No	No	No	No	No		No	No	Yes	No	No	8.83	29.83	16.44	172	4.09	103	33.98	80.2	12.4	22.5	4.65	19.4	5.04	4.1	Yes	No	No	No
No	Mal	67	159	59	90	No	No	Yes	No	Yes	Yes	3	2	0	T3N2M0	Ⅲ	[pT3N2M0B]	No	No	No	No	No	No	No	No		No	No	Yes	No	No	2.1	6.02	7.32	173	4.55	143	41.7	77.6	10.4	23.3	2.17	5.1	1.67	5.66	Yes	No	No	No
No	Mal	68	162	50	80	No	No	No	No	Yes	No	1	0	0	T1N0M0	Ⅰ	[T1aN0M0IA期]	No	Yes	No	No	No	No	No	No		Yes	No	Yes	No	No	1.03	12.97	5.37	221	4.23	131	42.9	51.9	11.5	29.8	2.42	1.3	0.32	3.53	Yes	Yes	No	No
No	Mal	60	170	64	80	No	No	No	No	Yes	Yes							No	No	No	No	Yes	No	No	No		Yes	No	No	No	No	>100.00	10.94	5.41	187	4.25	109	43.26	54.5	11.7	26.3	4.09	1.3	0.48	3.57	No	Yes	No	No
No	Mal	61	165	59	80	No	No	No	No	Yes	Yes	4	0	0	T4N0M0	Ⅱ	[pT4aN0M0IIb期]	No	No	No	No	Yes	No	No	No		Yes	No	Yes	No	No	1.13	25.03	5.2	152	4.82	151	48.07	67.1	12.3	25.9	1.97	0.6	0.06		Yes	No	No	No
No	Fem	57	151	48	90	No	No	No	No	No	No							No	No	No	No	No	No	No	No		No	No	Yes	No	No	<0.50	4.9	7.52	201	4.42	127	49.87	53.2	13.1	21.7	2.38	0.7	0.16		Yes	No	No	No
No	Fem	72	147	60	80	No	No	No	No	No	No							No	No	No	No	No	No	No	No		No	No	Yes	No	No			4	180	4.75	145	41.6	52.8	11.4	24.3	2.02	1.1	0.17	4.75	Yes	No	No	No
No	Mal	71	170	56	80	No	No	No	Yes	No	No	4	2	0	T4N2M0	Ⅲ	[T4aN2M0IIIb期]	No	No	No	No	Yes	No	No	No		No	No	No	No	No	0.94	28.44	4.85	560	4.02	86	38.63	83.7	11.7	21.2	3.58	3.3	1.1	3.9	No	No	No	No
No	Fem	53	156	42	70	No	No	No	No	Yes	No	4	0	0	T4N0M0	Ⅲ	[pT4bN0M0IIIB期]	No	No	Yes	No	No	No	No	No		Yes	No	Yes	No	No	0.74	5.1	4.16	205	4.32	106	44.52	46.5	13.3	28.2	1.74	1.55	0.55		No	No	No	No
No	Mal	42	172	52	90	No	No	No	No	Yes	No	X	0	1	TXN0M1	Ⅳ		No	No	No	No	No	No	Yes	No		No	No	Yes	No	No			6.23	247	4.81	116	48.15	73	12.1	24.7	3.12	0.7	0.16		Yes	No	No	No
No	Fem	57	153	51.5	80	No	No	No	No	Yes	Yes	4	X	1	T4NXM1	Ⅳ	[PT4bNxM1]	No	No	No	No	No	No	No	No		No	No	Yes	No	No	1.69	10.11	7.29	190	4	121	39.83	46.1	13.5	25.6	2.94	59.3	21.35	5.09	Yes	Yes	No	No
No	Fem	51	160	52.5	90	No	No	No	No	Yes	Yes	4	0	0	T4N0M0	Ⅱ	[pT4aN1cM0ⅢA期]	No	No	No	No	Yes	No	No	No		Yes	No	Yes	No	No	<0.50	13.49	5	170	4.16	126	44.62	57.4	12.5	27.1	3.03	1.6	0.51	3.09	Yes	No	No	No
No	Mal	54	168	63	90	No	No	No	No	Yes	No	0	1	1	T0N1M1	Ⅳ	[rcT0N0M1cIVc期]	No	No	Yes	No	Yes	No	No	No		Yes	No	Yes	No	No	1.68	14.37	5.05	104	4.59	144	43.73	63.5	12.2	23.6	2.98	3.3	1.33		Yes	No	No	No
No	Mal	77	172	58	70	No	No	No	No	Yes	No	3	2	0	T3N2M0	Ⅲ		No	No	No	No	No	No	No	No		No	No	No	No	No	1.29	17.75	7.73	162	4.61	129	41.61	77.4	13.5	27.1	3.83	2.6	0.69	4.09	Yes	No	No	No
No	Fem	75	149	47.5	90	No	Yes	No	No	No	No	1	0	0	T1N0M0	Ⅰ	[T1N0M0IA期]	No	No	No	No	No	No	No	No		No	No	Yes	No	No	2.42	2.48	4.55	205	4.7	151	46	56	11.5	19.6	4.26	0.6	0.15		Yes	No	No	No
No	Mal	63	165	57.5	80	No	No	No	No	Yes	Yes							No	No	No	No	No	No	No	No		No	No	Yes	No	No	<0.50	6.53	4.81	148	4.73	143	45.45	130.4	11.9	23.9	5.1	2	0.57		Yes	No	No	No
No	Mal	75	169	63	80	No	No	No	No	Yes	Yes	2	0	0	T2N0M0	Ⅰ	[pT2N0M0Ib期]	No	No	No	No	No	No	No	No		Yes	No	Yes	No	No	0.75	10.93	3.15	145	4.46	134	45.28	74.5	14.4	28.2	3.55	0.4	0.21	3.71	Yes	No	No	No
No	Mal	63	165	65	80	No	No	No	No	Yes	No	4	0	1	T4N0M1	Ⅳ	[cT4N0M1IV期]	No	No	No	No	No	No	No	No		Yes	No	Yes	No	No	1.01	8.11	5.73	190	4.4	164	43.46	72.7	10.7	25.7	4.9	2	0.63	5.12	Yes	No	No	No
No	Mal	67			70	No	No	No	No	Yes	No							No	No	No	No	No	No	No	No		No	No	No	No	No			12.5	157	3.79	122	44.73	73.1	13.2	21.1	2.16	6.9	2.12		No	No	No	No
No	Mal	74	160	52	80	No	No	No	No	Yes	Yes	4	2	0	T4N2M0	Ⅳ		No	No	No	No	No	No	No	No		No	No	Yes	No	No	1.39	<1.20	7.03	294	4.02	116	30.5	54.2	13.7	39.3	4.38	2	0.25	3.5	Yes	No	No	No
No	Fem	53	150	50	80	No	No	No	No	No	No							No	No	No	No	No	No	No	No		No	No	Yes	No	No	<0.50	22.27	7.1	250	4.51	136	46.41	44.5	10.9	20.1	2.89	1.6	0.23	7.11	Yes	No	No	No
No	Mal	66	163	59	80	No	No	No	No	Yes	Yes	4	1	0	T4N1M0	Ⅲ	[pT4aN1M0ⅢB期]	No	Yes	No	No	Yes	No	No	No		No	No	Yes	No	No	52.02	5.36	6.88	213	4.68	135	42.3	78.3	11	20.7	5.38	2.5	0.71	4.83	Yes	No	No	No
No	Fem	50	155	72	90	No	No	No	No	Yes	No							No	No	No	No	No	No	No	No		Yes	No	Yes	No	No	3.23	>700.00	5.96	183	5.15	149	41.05	83.1	12.3	26.5	5.1	4.9	1.53		Yes	No	No	No
No	Mal	68	160	69	90	No	Yes	No	No	Yes	No	4	X	0	T4NXM0	Ⅲ	[cT4NXM0]	No	No	No	No	No	No	No	No		No	No	No	No	Yes	7.79	601.02	5.27	275	3.64	102	36.49	78.8	11	18.5	4.51	1.8	0.41	3.73	No	No	No	No
No	Mal	49	160	50.5	80	No	No	No	No	Yes	No	4	X	1	T4NXM1	Ⅳ		No	No	No	No	No	No	No	No		Yes	No	No	No	No	>100.00	604.81	5.33	229	4.45	137	40.84	59	11.6	25.2	3.71	11.1	3.5	3.49	Yes	Yes	No	No
No	Fem	53	155	40	70	No	No	No	No	Yes	No	4	0	1	T4N0M1	Ⅳ	[T4bN0M1Ⅳ期]	No	Yes	Yes	No	Yes	No	Yes	No		Yes	No	No	No	No	3.06	97.89	5.97	199	4.12	140	39.82	41.4	12.7	24.5	7.65	8.1	2.98	2.43	Yes	Yes	No	No
No	Mal	71	158	45	70	No	Yes	No	Yes	No	No							No	No	No	No	No	No	No	No		No	No	No	No	No			13.38	373	4.56	136	41.47	96.7	10.5	18.7	2.26	1.2	0.13		No	No	No	No
No	Mal	61	174	48	70	No	No	No	No	Yes	No							No	No	No	No	No	No	No	No		No	No	Yes	No	No	1.9	364.84	6.18	308	4.66	133	38.63	53.4	11.9	26.4	3.95	5.4	1.39	3.22	Yes	No	No	No
No	Fem	80	145	36.5	70	No	No	No	No	Yes	No	X	2	1	TXN2M1	Ⅳ		No	No	No	No	No	No	Yes	No		No	No	No	No	No	6.1	>700.00	10.97	234	3.43	103	32.79	61.8	12.5	30.1	3.83	5.7	2.18		No	No	No	No
No	Mal	65	172	68	90	No	No	Yes	No	Yes	Yes	4	1	0	T4N1M0	Ⅲ	[pT4bN1cM0IIIc期]	No	Yes	No	No	No	No	No	No		No	No	Yes	No	Yes	1.07	15.02	5.56	329	4.93	146	41.63	81	12.1	25.7	2.64	0.4	0.1		Yes	No	No	No
No	Fem	53	155	58	70	No	No	No	No	Yes	No	4	X	1	T4NXM1	Ⅳ		No	No	No	No	No	No	No	No		No	No	No	No	No	1.7	25.73	4.63	281	3.97	125	44.71	58.1	11.2	25.2	2.94	1.4	0.35		No	No	No	No
No	Fem	66	155	41	70	No	No	No	No	No	Yes							No	No	No	No	Yes	No	No	No		No	No	Yes	No	No	1.35	6.57	3.46	208	3.61	111	40.97	63.4	10.7	21.5	1.95	1.2	0.43	5.16	Yes	No	No	No
No	Fem	54	160	42	70	No	No	No	No	Yes	Yes	0	0	1	T0N0M1	Ⅳ	[rT0N0M1]	No	No	No	No	Yes	No	No	No		No	No	Yes	No	No	1.21	16.54	8.5	155	3.22	90	38.85	39	11.7	27.4	6.01	72.7	>10.00	3.05	Yes	No	No	No
No	Mal	53	173	66	90	No	No	No	No	Yes	Yes	3	X	0	T3NXM0	Ⅱ	[cT3NxM0II期]	No	No	No	No	No	No	No	No		No	No	No	No	No	2.47	17.06	5.99	173	4.39	143	43.92	64.8	12.1	23	2.14	0.8	0.19	4.19	Yes	No	No	No
No	Mal	75	175	76	70	No	Yes	Yes	No	Yes	No	4	3	1	T4N3M1	Ⅳ	[T4aN3aM1IV期]	No	No	Yes	No	No	No	No	No		No	No	Yes	No	No	17.78	8.3	5.67	112	4.63	140	42.01	69.2	11.9	27.6	4.38	3.1	0.89	4.5	Yes	No	No	No
No	Mal	52	161	70	80	No	No	No	No	Yes	No	4	1	X	T4N1MX		[cT4N1Mx]	No	No	No	No	No	No	No	No		No	No	No	No	No	2.02	11.4	5.24	201	3.77	122	39.7	62.9	11.3	21.7	2.73	1.2	0.26		No	Yes	No	No
No	Mal	61	165	60	90	No	No	No	No	Yes	Yes	3	0	0	T3N0M0	Ⅱ	[cT3NxM0II期]	No	No	No	No	No	No	No	No		No	No	No	No	No	1.62	10.16	4.62	184	3.96	127	46.35	73.7	11.2	24	3.1	1.6	0.25	4.41	Yes	No	No	No
No	Mal	56	168	46	70	No	Yes	No	Yes	No	No	1	0	0	T1N0M0	Ⅰ	[T1N0M0]	No	No	No	No	No	No	No	No		No	No	Yes	No	No	2.5	15.83	5.16	243	4.35	129	44.52	74.7	10.7	21.1	3.1	0.6	0.3	4.53	Yes	No	No	No
No	Fem	55	156	51	70	No	No	No	No	No	Yes							No	No	No	No	Yes	No	No	No		No	No	No	No	No	<0.50	10.52	4.03	356	2.01	64	39.42	128.9	11.6	25.2	3.31	15.5	4.46	3.65	No	No	No	No
No	Mal	71	150	52.5	90	No	No	No	No	No	No							No	No	No	No	Yes	No	No	No		No	No	Yes	No	No	2	15.9	7.87	208	4.44	135	44.43	89.6	11.4	28.1	2.23	1.2	0.21	3.79	Yes	No	No	No
No	Mal	63	167	51	80	No	Yes	No	No	Yes	No	X	0	1	TXN0M1	Ⅳ	[rTxN0M1IV期]	No	No	Yes	No	No	No	No	No		No	No	No	No	No			2.34	73	4.1	121	41.44	65	11.7	32.7	2.43	1.4	0.31		No	No	No	No
No	Fem	71	148	43	90	No	No	No	No	Yes	Yes	4	1	0	T4N1M0	Ⅲ	[pT4aN1cM0IIIa期]	No	No	No	No	Yes	No	No	No		Yes	No	Yes	No	No	0.89	6.96	6.94	287	3.39	95	30.19	43.5	10.8	29.3	4.65	2	0.48	3.59	Yes	No	No	No
No	Mal	87	150	45	80	No	No	No	No	Yes	No	3	X	X	T3NXMX		[T3NxMx]	No	No	Yes	No	Yes	No	No	No		No	No	No	No	No	2.28	439.5	5.09	132	3.12	67	33.06	68.1	12.2	28.4	3.12	1.5	0.43	2.75	Yes	No	No	No
No	Fem	79	162	55	80	No	No	No	No	Yes	Yes							No	Yes	Yes	No	Yes	No	No	No		No	No	No	No	No	2.3	28.11	3.06	162	2.03	70	31.1	79.1	11.9	27.3	1.69	18.3	8.68	3.73	No	No	No	No
No	Mal	87	165	76	60	No	Yes	No	Yes	Yes	No	X	X	1	TXNXM1	Ⅳ	[cTxNxM1IV期]	No	No	No	No	No	No	No	No		No	No	No	No	No	1.97	>700.00	7.51	135	4.33	128	47.43	88.8	13.1	28.6	2.7	0.92	0.45	3.07	Yes	No	No	No
No	Mal	65	165	35	70	No	No	No	No	Yes	No							No	Yes	No	No	No	No	No	No		No	No	No	No	No	2.54	11.87	11.52	349	3.86	120	32.71	54.8	11.2	32.8	6.24	2	0.45	4.49	No	No	No	No
No	Mal	66	175	52.5	90	No	No	No	No	No	No	1	0	0	T1N0M0	Ⅰ	[T1N0M0]	No	No	No	No	No	No	No	No		No	No	Yes	No	No	2.25		4.12	195	4.83	133	45.14	67.3	10.8	27.6	3.55	1.1	0.23	4.58	Yes	No	No	No
No	Mal	62	168	58	80	No	No	No	No	Yes	Yes	4	2	0	T4N2M0	Ⅲ	[pT4N2bM0ⅢC期]	No	No	No	No	Yes	No	No	No		No	No	Yes	No	No	<0.50	7.17	7.31	241	4.12	109	42.95	67.2	11.2	28.6	3.74	1.4	0.3	4.91	Yes	No	No	No
No	Fem	61	145	45	90	No	No	No	No	Yes	No	X	1	1	TXN1M1	Ⅳ		No	No	No	No	No	No	No	No		No	No	No	No	No	840.7	11.82	10.1	352	4.11	125	51.78	56.2	12.5	22.8	2.8	1.9	0.47	6.92	No	No	No	No
No	Mal	74	160	49	80	No	No	No	No	Yes	No	4	3	1	T4N3M1	Ⅳ		No	No	No	No	No	No	No	No		No	No	No	No	No	94.21	10.11	16.9	49	3.78	132	35.1	79	13.9	25.1	2.6	99.6	>10.00	4.42	Yes	No	No	No
No	Mal	68	170	50	80	No	No	No	No	Yes	No	X	X	1	TXNXM1	Ⅳ	[TxNxM1Ⅳ期]	No	No	No	No	Yes	No	No	No		No	No	No	No	No	256.5	689.34	6.58	262	3.77	74	35.5	57.4	11.8	27.6	3.58	5.3	1.49		No	No	No	No
No	Mal	56	177	57	80	No	No	No	No	Yes	No	3	1	1	T3N1M1	Ⅳ		No	No	No	No	No	No	No	No		No	No	Yes	No	No	0.99	4.63	5.22	242	4.78	146	42.32	85.5	10.9	25.2	6.76	2.9	0.82	3.07	Yes	No	No	No
No	Mal	67	165	70	80	No	Yes	No	Yes	Yes	Yes	3	3	0	T3N3M0	Ⅳ		No	Yes	No	No	Yes	No	No	No		No	No	Yes	No	No	70.88	37.52	6.49	205	4.45	142	41.53	80.2	12.3	24.6	3.54	3.9	0.85	4.76	Yes	No	No	No
No	Fem	69			70	No	No	No	No	Yes	Yes	4	3	0	T4N3M0	Ⅲ	[pT4bN3aM0IIIc期]	No	Yes	No	No	Yes	No	Yes	No		No	No	Yes	No	No	3.94	16.58	11.15	289	3.69	109	36.88	87.3	12.7	33.7	5.79	9.4	2.62	4.22	Yes	No	No	No
No	Mal	48	159	52	70	No	No	No	No	Yes	Yes	4	3	0	T4N3M0	Ⅲ	[pT4bN3aM0IIIC期]	Yes	No	No	No	Yes	No	No	No		No	No	Yes	No	No	1.78	9.39	4.8	306	3.49	95	46.2	58.8	13	26.7	3.08	6.6	1.63	4.78	Yes	No	No	No
No	Mal	53	171	76	80	No	No	No	No	Yes	Yes	4	3	0	T4N3M0	Ⅲ	[pT4aN3aM0IIIc期]	No	No	No	No	No	No	No	No		No	No	Yes	No	Yes	2.89	7.73	8.94	202	6.08	175	50.76	69.4	10.8	26.6	4.51	0.9	0.24		Yes	No	No	No
No	Mal	60	158	70	90	No	No	No	No	Yes	No	1	0	0	T1N0M0	Ⅰ		No	Yes	No	No	No	No	No	No		No	No	No	No	No	0.89	536.21	10.37	151	5.04	155	46.74	68.4	13.2	28.7	7.11	3.8	0.94	3.76	Yes	No	No	No
No	Fem	55	155	58	90	No	Yes	No	No	Yes	Yes	3	0	0	T3N0M0	Ⅲ	[pT3N0M0Ⅲ期]	No	No	Yes	No	No	No	No	No		No	No	Yes	No	No	<0.50	12.92	4.39	216	4.75	146	51.3	55	10.8	24.3	2.64	0.9	0.16	5.79	Yes	No	No	No
No	Mal	70	155	42.5	90	No	No	No	No	Yes	Yes	3	3	0	T3N3M0	Ⅲ		No	No	No	No	No	No	No	No		No	No	Yes	No	No	2.09	8.01	4.53	200	4	116	37.9	50	12.5	28.7	3.18	2.8	0.59	3.97	Yes	No	No	No
No	Mal	77	158	46	80	No	No	No	No	Yes	No							No	No	No	No	Yes	No	No	No		No	No	No	No	No	5.12	22.3	3.57	92	3.38	109	35	134	11.9	34.8	3.74	10.6	3.12		Yes	No	No	No
No	Mal	70	164	37	70	No	No	No	No	No	No							No	Yes	No	No	No	No	No	No		No	No	No	No	No	4.44	25.17	7.83	87	4.27	121	26.7	67.8	17.1	49.9	2.75	21.1	9.8		No	No	No	No
No	Fem	63	150	54	90	No	Yes	No	No	Yes	No					Ⅳ		No	No	No	No	No	No	No	No		No	No	No	No	No	1.13	15.91	5.07	259	4.31	124	39.4	46.7	13	29.2	3.47	3.4	0.3	5.87	No	No	No	No
No	Fem	65	155	36	70	No	No	No	No	No	No							No	No	No	No	Yes	No	Yes	No		No	No	No	No	No	2.06	13.85	2.88	231	3.93	117	48.1	39.4	11.2	25.1	3.55	1	0.19	5.4	Yes	No	No	No
No	Mal	50	160	55	70	No	No	No	No	Yes	No	4	0	1	T4N0M1	Ⅳ	[pT4aN0M1IV期]	No	No	Yes	No	No	No	No	No		Yes	No	Yes	No	No	<0.50	7.65	3.26	169	3.94	121	37.34	56.6	11.2	25.7	6.76	1.8	0.31		Yes	Yes	No	No
No	Mal	70	165	49	70	No	No	No	No	Yes	Yes					Ⅲ		No	Yes	No	No	No	No	No	No		Yes	No	Yes	No	No	5.64	14.75	6.69	140	4.36	125	36.6	72.1	12.7	29	3.55	1.36	0.23	4.37	Yes	No	No	No
No	Mal	74	158	55	90	No	Yes	No	No	No	No	4	X	0	T4NXM0	Ⅲ	[cT4NXM0]	No	No	No	No	No	No	No	No		Yes	No	No	No	Yes	1.74	15.07	4.06	164	3.92	119	33.8	55.9	11.5	29.2	3.44	1.9	0.44	4.34	No	Yes	No	No
No	Mal	74	158	42	70	No	Yes	No	No	Yes	No	4	2	1	T4N2M1	Ⅳ		No	No	No	No	Yes	No	Yes	No		No	No	No	No	No	<0.50	14.02	6.31	369	3.49	89	32.2	66.7	12.9	26.6	3.54	8.1	2.55		No	No	No	No
No	Mal	82	162	57	80	No	Yes	No	No	Yes	No							No	No	No	No	No	No	No	No		No	No	No	No	No	<0.50	6.23	4.47	207	5.21	123	42.4	68.4	11.8	32.4	2.51	2.9	0.8	3.28	Yes	No	No	No
No	Fem	77	149	46	80	No	Yes	No	No	Yes	Yes	4	1	0	T4N1M0	Ⅲ	[pT4aN1M0IIIb期]	No	No	No	No	Yes	No	No	No		Yes	No	Yes	No	Yes	<0.50	14.29	3.06	138	2.77	80	43.68	61.7	11.5	27.2	3.8	2.4	0.58	3.94	Yes	No	No	No
No	Mal	68	175	57	90	No	No	No	No	Yes	No	3	1	0	T3N1M0	Ⅲ	[pT3N1M0III期]	No	No	Yes	No	No	No	No	No		Yes	No	Yes	No	No	3.8	7.32	4.6	110	3.64	129	47.5	54.8	11.7	28.3	2.96	2.9	0.76	5.52	No	Yes	No	No
No	Fem	52	151	46	90	No	No	No	No	Yes	Yes	4	0	0	T4N0M0	Ⅱ	[Ⅱ期pT4N0M0]	No	No	Yes	No	Yes	No	No	No		No	No	Yes	No	No	0.88	23.77	4.62	158	3.93	123	39.6	55.3	11.8	32.6	2.91	1	0.25	4.56	Yes	No	No	No
No	Fem	47	158	59	90	No	No	No	No	Yes	Yes	1	0	0	T1N0M0	Ⅰ	[pT1aN0M0Ⅰ期]	No	No	No	No	Yes	No	No	No		No	No	Yes	No	No	<0.50	31.51	4.3	140	4.5	141	48.1	64.2	12.3	27.6	2.24	1.7	0.31	5.13	Yes	No	No	No
No	Mal	72	170	48.5	80	No	No	No	No	No	No							No	No	No	No	No	No	No	No		No	No	No	No	No	5.74	22.47	5.98	195	3.97	125	34.92	77.1	12.8	34.8	3.95	1.3	2.06	2.92	No	No	No	No
No	Mal	61	165	48	90	No	No	No	No	Yes	Yes	4	X	1	T4NXM1	Ⅳ	[cT4bNxM1IV期]	No	No	No	No	Yes	No	No	No		No	No	Yes	No	No	60.91	>700.00	4.12	289	3.34	99	36.52	62.7	12.6	28.2	2.8	8.4	3.13		Yes	No	No	No
No	Fem	63	155	48	80	No	No	No	No	No	No							No	No	No	No	Yes	No	No	No		No	No	Yes	No	No	1.44	19.07	4.92	323	3.35	93	40.41	54.7	10.9	22.5	2.92	16.6	6.22	5.03	Yes	No	No	No
No	Mal	74	170	47	80	No	No	No	No	Yes	No	4	2	0	T4N2M0	Ⅲ	[cT4N2M0Ⅲ期]	No	No	No	No	Yes	No	No	No		Yes	No	No	No	No	2.84	65.86	4.18	160	2.96	86	32.33	59.7	13.2	33.5	4.23	1	0.26	3.15	Yes	No	No	No
No	Mal	73	158	45	70	No	Yes	No	No	Yes	No							No	No	No	No	Yes	No	No	No		No	No	No	No	No	1.27	8.9	7.3	272	3.53	87	31.64	73.9	12.5	28	4.26	5.7	1.75	3.11	Yes	No	No	No
No	Fem	82	145	60	80	No	No	No	No	Yes	Yes	3	1	0	T3N1M0	Ⅲ	[pT3NxM0Ⅱ-Ⅲ期]	No	No	No	No	Yes	No	No	No		Yes	No	Yes	No	No	1.61	10.46	7.78	396	2.43	63	34	113.2	11	22.7	4.65	9.4	2.16	3.35	No	Yes	No	No
No	Mal	74	160	68.5	90	No	No	No	No	No	Yes	3	0	0	T3N0M0	Ⅱ	[cT3N0M0]	No	No	No	No	No	No	No	No		No	No	No	No	No	2.46	12.97	5.95	131	5.51	116	41	79.4						4.33	No	No	No	No
No	Mal	44	173	71	80	No	No	No	No	Yes	Yes	4	3	1	T4N3M1	Ⅳ	[cT4bN3M1Ⅳ期]	No	No	No	No	Yes	No	No	No		No	No	Yes	No	No	0.74	11.23	8.15	402	3.34	68	38.02	120.3	13.8	28.5	4.55	14.7	4.28		Yes	No	No	No
No	Mal	86	170	54	50	No	Yes	No	No	Yes	No	4	0	1	T4N0M1	Ⅳ	[T4N0M1IV期]	No	No	No	No	Yes	No	No	No		No	No	No	No	No															No	No	No	No
No	Mal	61	157	35.5	90	No	No	No	No	Yes	Yes	4	1	0	T4N1M0	Ⅲ	[cT4N1M0ⅢCA期]	No	Yes	Yes	No	Yes	No	No	No		No	No	No	No	No	0.94		5.15	74	3.1	92	22.7	25.6	14.5	34.4	2.45	5.5	1.13	0.25	Yes	No	No	No
No	Fem	44	156	47	80	No	No	No	No	Yes	Yes	1	0	0	T1N0M0	Ⅰ	[pT1N0M0]	No	No	No	No	No	No	No	No		No	No	Yes	No	No	1.24	15.7	4.72	192	4.17	111	53.29	55.9	10.8	32.1	2.16	0.5	0.15	5.58	Yes	No	No	No
No	Mal	76			20	No	Yes	No	No	Yes	No							No	No	No	No	Yes	No	No	No		No	No	No	No	No	>100.00	>700.00	8.1	97	3.64	97	23.39	225.7	21.1	44.4	1.97	32.2	10.24		No	No	No	No
No	Fem	72	160	46	80	No	No	No	No	Yes	Yes	4	X	1	T4NXM1	Ⅳ	[cT4N1M1Ⅳ期]	No	No	No	No	Yes	No	No	No		No	No	No	No	No	1.17	17.92	4.99	235	2.45	48	34.3	62.5	12.2	28.4	3.12	12.6	5.08	3.48	No	No	No	No
No	Fem	62	156	60	80	No	No	No	No	Yes	No					Ⅳ		No	No	No	No	No	No	No	No		No	No	No	No	No	<0.50	6.5	28.91	221	3.64	92	33.3	108.7	11.3	22.6	5.1	8.8	1.99	3.55	No	No	No	No
No	Fem	54	145	49	90	No	No	No	No	No	No							No	No	No	No	No	No	No	No		No	No	No	No	No	6.5	18.43	4.22	187	4.42	138	46.82	48	12.1	32.5	1.54	0.7	0.11	4.42	Yes	No	No	No
No	Fem	49	160	58	100	No	No	No	No	No	Yes	2	0	0	T2N0M0	Ⅰ	[PT2N0M0IB期]	No	No	No	No	No	No	No	No		No	No	Yes	No	No	0.77	9.94	4.43	203	4.69	101	42.5	43	12	30.2	2.51	1	0.19	3.8	Yes	No	No	No
No	Fem	49	159	72	90	No	No	No	No	No	No							No	No	No	No	No	No	No	No		No	No	Yes	No	No	1.9	10.39	4.99	265	4.24	128	44	42.4	10.8	23.4	2.47	0.7	0.1	5.82	Yes	No	No	No
No	Mal	64	162		70	No	Yes	No	No	Yes	No	4	3	1	T4N3M1	Ⅳ	[cT4bN3M1ⅣB期]	Yes	No	No	No	Yes	No	Yes	No		No	No	No	No	No	0.82	302.79	3.9	243	3.54	95	37.43	51.6	12.4	31.6	5.79	4.9	1.19	3.73	Yes	No	No	No
No	Fem	70	146	42	60	No	No	No	No	Yes	No							No	No	No	No	Yes	No	No	No		No	No	No	No	No	89.25	4.64	4.4	200	3	91	41.16	82.1	12.9	31.8	3.66	3.6	1.16	1.11	No	No	No	No
No	Mal	65	162	49	70	No	No	No	No	Yes	No	4	0	X	T4N0MX	Ⅲ		No	No	No	No	No	No	No	No		No	No	No	No	No	>100.00	3.45	5.4	267	4.45	117	37.3	60.9	12.2	30.1	3.35	2.4	0.68	3.36	No	No	No	No
No	Fem	47	153	55	80	No	No	No	No	No	Yes							No	No	No	No	Yes	No	No	No		No	No	Yes	No	No	<0.50	5.69	4.44	216	3.17	102	36.49	53.1	11.9	29.1	1.84	0.9	0.47	3.68	Yes	No	No	No
No	Fem	66	150	38	70	No	No	No	No	Yes	No	X	1	1	TXN1M1	Ⅳ	[IV期cTxN1M1]	Yes	Yes	No	No	No	No	No	No		No	No	Yes	No	No	11.14	>700.00	9.03	178	3.22	103	31.5	37.7	12.9	27.3	1.28	28.5	>10.00	7.87	Yes	No	No	No
No	Mal	60	165	55	80	No	No	No	No	Yes	No	4	X	1	T4NXM1	Ⅳ	[T4NxM1IV期]	No	No	Yes	No	No	No	Yes	No		Yes	No	No	No	No	3.6	197.48	14.25	185	5.81	170	34.59	77.2	12.2	29.5	4.65	6.8	1.79	2.99	Yes	Yes	No	No
No	Fem	65	157	42	70	No	Yes	No	No	Yes	No					Ⅳ		No	No	No	No	Yes	No	No	No		No	No	No	No	No	0.73	7.81	2.79	141	1.63	58	36.5	156.2	12.4	27.2	3.08	43.4	14.36		No	No	No	No
No	Mal	61	155	50	80	No	No	No	No	Yes	Yes	4	1	0	T4N1M0	Ⅲ	[cT4aN1M0Ⅲ期]	No	No	No	No	Yes	No	No	No		No	No	No	No	No	2.79	7.46	5.86	347	3.81	99	42	58.3	11.9	25.3	4.51	4.7	1.34		Yes	No	No	No
No	Fem	38	164	55	90	No	No	No	No	No	Yes	is	0	0	TisN0M0	0	[pTisN0M00期]	No	No	No	No	Yes	No	No	No		No	No	Yes	No	No	<0.50	19.31	5.81	231	4.34	132	43.5	53.2	11	27	2.23	0.68	0.17		Yes	No	No	No
No	Fem	63	148	52	90	No	No	No	No	Yes	No	4	X	X	T4NXMX	Ⅱ		No	No	No	No	No	No	No	No		No	No	No	No	No	0.87	17.14	6.33	119	4.17	141	39.9	50.6	12.9	25.9	1.95	1.4	0.35	2.51	Yes	No	No	No
No	Mal	62	173	75	90	No	No	No	No	Yes	Yes	1	1	0	T1N1M0	Ⅰ	[pT1bN1cM0Ib期]	Yes	No	No	No	Yes	No	No	No		No	No	Yes	No	Yes	6.74	3.63	5.29	145	3.05	123	42.8	38.5	10.8	24.4	3.18	1.4	0.28	4.03	Yes	No	No	No
No	Mal	62	166	51	80	No	No	No	No	Yes	No							No	No	Yes	No	No	No	No	No		Yes	No	Yes	No	No	9.31	25.89	6.53	334	4.68	127	41.5	71.7	12	25.1	5.1	9.4	2.1	5.2	No	Yes	No	No
No	Mal	79	173	68	80	No	Yes	No	No	Yes	No	1	0	0	T1N0M0	Ⅰ	[pT1N0M0]	No	No	No	No	No	No	No	No		No	No	No	No	No	<0.50	27.43	8.15	244	4.24	136	37.95	118.5	13.1	28.5	3.74	2.8	0.66	4.77	Yes	No	No	No
No	Fem	63	167	54	70	No	No	No	No	Yes	No	4	X	1	T4NXM1	Ⅳ	[rT4NxM1p1IV期]	No	No	No	No	Yes	No	No	No		Yes	No	No	No	No	1.59	9.8	5.66	188	3.54	109	41.8	32.4	12	29.5	3.66	10.2	3.07		No	No	No	No
No	Fem	42	164	55	90	No	No	No	No	Yes	No	4	3	1	T4N3M1	Ⅳ		No	No	No	No	Yes	No	No	No		Yes	No	Yes	No	No	>100.00	>700.00	14.92	425	4.21	116	41.1	41.8	11.6	27.6	6.24	40.7	>10.00	5.35	Yes	No	No	No
No	Mal	67	158	47	90	No	No	No	No	Yes	Yes	3	0	0	T3N0M0	Ⅱ	[cT3N0M0IIA]	No	No	No	No	No	No	No	No		Yes	No	No	No	No	8.56	4.45	7.33	199	4.48	128	37.9	78.8	11.5	26.3	3.07	2.7	0.79	3.77	Yes	Yes	No	No
No	Fem	67	165	61	80	No	No	No	No	No	No	X	X	1	TXNXM1	Ⅳ	[rTxNxM1IV期]	No	No	No	No	No	No	No	No		No	No	No	No	No	<0.50	13.17	3.51	227	3.88	121	34.7	55	13.9	27.6	3.29	1.2	0.25		No	No	No	No
No	Mal	66	168	45	70	No	No	Yes	No	Yes	No	3	X	X	T3NXMX	Ⅳ	[cT3NMx]	No	No	No	No	No	No	No	No		Yes	No	No	No	No	8.95	251.15	5.59	115	3.81	120	35.7	58	12.6	26.4	4.1	6.1	1.88	6.11	No	Yes	No	No
No	Mal	41	162	50	50	No	No	No	No	Yes	No	4	X	0	T4NXM0	Ⅳ	[cT4bNxM0IVa期]	No	No	No	No	No	No	No	No		Yes	No	No	No	No			9.16	494	5.78	115	43.7	172	12.1	21.2	2.94	3.4	0.89		No	Yes	No	No
No	Mal	66	160	50	60	No	No	No	No	Yes	No	4	3	1	T4N3M1	Ⅳ	[rT4aN3bM1Ⅳ期]	No	No	Yes	No	Yes	No	No	No		No	No	No	No	No	17.25	2209.6	3.18	115	2.65	85	31.2	55.6	13.3	24.7	1.63	18	6.88	5.5	No	No	No	No
No	Mal	56	162	50	90	No	No	No	No	Yes	Yes	4	3	0	T4N3M0	Ⅲ	[pT4aN3aM0IIIB期]	No	No	Yes	No	Yes	No	No	No		No	No	Yes	No	No	2.22	295.71	5.79	234	3.64	117	39.45	73.7	11.7	25.9	3.74	3.4	0.82	3.24	Yes	No	No	No
No	Mal	56	173	56	90	No	No	No	No	Yes	Yes	4	3	0	T4N3M0	Ⅲ	[pT4aN3aM0IIIB期]	No	No	Yes	No	Yes	No	No	No		No	No	Yes	No	No	0.73	5.89	6.69	245	4.5	139	43.35	74.4	10.8	27.5	3.31	0.9	0.37	3.32	Yes	No	No	No
No	Mal	62			70	No	No	No	No	Yes	No							Yes	No	No	No	Yes	No	No	No		No	No	No	No	No			8.41	70	3.53	101	27.72	51.9	12.6	30.4	3.47	19.9	7.73		No	No	No	No
No	Mal	61	177	65	70	No	Yes	No	No	Yes	No	4	0	0	T4N0M0	Ⅱ		Yes	No	No	No	Yes	No	No	No		No	No	No	No	No	0.5	7.56	11.29	138	3.97	129	41.4	86.7	12	23.1	2.62	1.3	0.37		No	No	No	No
No	Fem	78	146	59	50	No	Yes	No	No	No	Yes							Yes	Yes	No	No	Yes	No	No	No		No	No	No	No	No	8.78	206.94	9.95	302	2.8	64	31.29	59.4	14.2	34.8	4.09	5.2	1.01	1.74	No	No	No	No
No	Fem	55	163	49	70	No	No	No	No	Yes	No	4	1	0	T4N1M0	Ⅲ	[T4aN1MOIIIA期]	No	No	No	No	No	No	No	No		No	No	No	No	No	1.93	<1.20	4.37	210	3.95	121	49.5	36.7	10.4	25.4	2.59	0.6	0.13	4.78	Yes	Yes	No	No
No	Fem	84	139	36	80	No	Yes	No	No	Yes	Yes							No	No	No	No	Yes	No	No	No		No	No	Yes	No	No	1.47	15.4	4.1	286	2.63	54	29.5	35.4	11.9	28.7	3.44	2.3	0.62	3.81	Yes	No	No	No
No	Fem	65	150	52	80	No	No	No	No	No	No	2	0	0	T2N0M0	Ⅰ	[I期pT2N0M0]	No	No	No	No	No	No	No	No		No	No	No	No	No	0.5	7.67	5.16	246	4.31	125	42.38	62.1	10.8	24.8	2.51	0.8	0.11		Yes	No	No	No
No	Fem	48	157	48	80	No	No	No	No	No	No							No	No	No	No	Yes	No	No	No		No	No	No	No	No	<0.50	6.71	4.61	117	2.79	86	36.1	53.4	11.5	32	1.73	2	0.6		No	No	No	No
No	Mal	64	165	60	70	No	No	No	No	No	Yes							No	No	No	No	No	No	No	No		No	No	Yes	No	No	1.34	8.69	3.1	141	3.39	115	35.7	67.5	11.6	33.1	1.46	3	0.91	3.58	Yes	No	No	No
No	Mal	42	164	54	80	No	No	No	No	No	No							No	No	No	No	No	No	No	No		No	No	No	No	No			6.07	186	4.96	136	44.87	70.5	10.6	27.7	2.6	1.4	0.06		Yes	No	No	No
No	Mal	77	160	38	70	No	No	No	No	Yes	Yes	X	3	1	TXN3M1	Ⅳ	[cTxN3M1IV期]	No	Yes	No	No	Yes	No	No	No		No	No	No	No	No	0.72	11.59	21.14	375	3.43	96	29.32	79.6	14.5	32.8	5.79	5.4	1.08	3.75	Yes	Yes	No	No
No	Fem	64	139	38	80	No	No	No	No	Yes	No	3	1	0	T3N1M0	Ⅲ		No	Yes	Yes	No	Yes	No	No	No		Yes	No	Yes	No	No	1.1	14.25	4.38	319	3.24	99	40.39	48	12.2	24.7	3.31	8.8	3.49	4.87	Yes	No	No	No
No	Fem	58	149	49	90	No	No	No	No	Yes	Yes	4	1	0	T4N1M0	Ⅲ	[cT4bN1M0IIIc期]	No	No	No	No	Yes	No	No	No		No	No	Yes	No	No	1.88	260.42	4.83	364	4.17	79	39	44.9	12.8	30.9	2.76	2	0.41		Yes	No	No	No
No	Fem	50	148	52	90	No	No	No	No	Yes	Yes	3	1	0	T3N1M0	Ⅲ	[cT3N1M0G3ⅢB期]	No	No	No	No	No	No	No	No		No	No	No	No	No	<0.50	24.29	6.24	261	4.52	132	40.6	47.3	11	31	2.73	0.9	0.17	4.51	No	No	No	No
Yes	Mal	62	162	52	80	No	No	No	No	Yes	Yes	4	3	0	T4N3M0	Ⅳ	[cT4bN3M0Ⅳ期]	Yes	No	No	No	Yes	No	No	No		No	No	Yes	No	No	1.42	17.79	7.21	251	3.03	83	27.96	36	14.2	33.1	2.35	17.3	6.93	3.33	Yes	No	No	No
No	Mal	78	164	44	70	No	No	No	Yes	No	No							No	No	No	No	Yes	No	No	No		No	No	No	No	No	<0.50	12.15	9.41	367	3.24	101	33.4	69.9	12.5	27.7	4.54	3.8	0.92	3.75	No	No	No	No
No	Mal	64	165	61	90	No	No	No	No	Yes	No	X	X	1	TXNXM1	Ⅳ		No	No	No	No	No	No	No	No		No	No	No	No	No			2.97	175	3.8	114	44.68	87.3	11.5	38.2	2.3	1.3	0.25		No	No	No	No
No	Mal	51	155	57.5	90	No	No	No	No	Yes	Yes	4	3	1	T4N3M1	Ⅳ	[pT4aN3aM1Ⅳ期]	No	No	No	No	Yes	No	Yes	No		No	No	Yes	No	No	3.39	12.41	5.05	186	5.07	148	46.38	72.6	10.3	23.1	2.55	1	0.17	4.23	Yes	No	No	No
No	Mal	49	167		90	No	No	No	Yes	No	No							No	No	No	No	No	No	No	No		No	No	Yes	No	No	1.56	16.76	4.6	139	4.63	154	43.1	56.7	9.9	24.6	3.26	<2.50	0.17	8.29	Yes	No	No	No
No	Mal	54	168	55	80	No	No	No	No	Yes	No	4	3	1	T4N3M1	Ⅳ	[cT4bN1M1Ⅳ期]	No	Yes	No	No	Yes	No	No	No		Yes	No	No	No	No	<0.50	9.34	5.35	253	3.19	89	35.7	54.2	11.4	29.3	3.74	1.8	0.49	3.45	No	Yes	No	No
No	Mal	62	162	71.9	70	No	No	No	No	Yes	Yes	2	X	1	T2NXM1	Ⅳ	[cT2NxM1Ⅳ期]	Yes	Yes	No	No	Yes	No	No	No		No	No	Yes	No	No	46.51	130.5	7.75	355	3.81	82	38.5	94	11	26.5	6.37	8.5	2.66	1.86	Yes	No	No	No
No	Mal	61	164	58	90	No	Yes	No	Yes	Yes	No	4	3	0	T4N3M0	Ⅲ	[T4aN3bM0ⅢC期]	No	No	No	No	No	No	No	No		Yes	No	Yes	No	No	1.15	6.95	7.9	558	3.94	123	38.9	40.3	12.1	31.2	2.86	2.6	0.9		No	Yes	No	No
No	Mal	70	165	66.5	90	No	No	No	No	Yes	No	3	1	0	T3N1M0	Ⅲ	[cT3N1M0GxⅢB期]	Yes	No	Yes	No	Yes	No	No	No		No	No	No	No	No	1.85	9.47	4.14	254	4.36	100	35.6	61.7	11.7	35.7	2.07	3	0.58	3.66	No	Yes	No	No
No	Mal	35	173	70	90	No	No	No	No	Yes	Yes	2	1	0	T2N1M0	Ⅱ	[pT2N1M0IIa期]	No	No	Yes	No	No	No	No	No		No	No	Yes	No	No	<0.50	9.81	6.05	300	4.91	148	44.4	68.4	11.2	25.8	2.55	2.6	0.58	3.2	Yes	No	No	No
No	Mal	74	159	52	80	No	No	No	No	Yes	Yes	4	3	0	T4N3M0	Ⅲ	[pT4aN3aM0ⅢC期]	Yes	No	No	No	Yes	No	No	No		No	No	Yes	No	No	1.31	541.4	3.62	165	2.37	74	34.88	60.2	12.7	32.5	2.26	1.11	0.56	3.01	Yes	No	No	No
No	Mal	65	173	74	90	No	Yes	No	No	Yes	Yes	4	1	0	T4N1M0	Ⅲ	[pT4bN1cM0ⅢC期]	Yes	Yes	Yes	No	Yes	No	Yes	No		No	No	Yes	No	No	<0.50	4.12	4.64	161	2.56	89	43.4	92.5	11.6	35.6	4.65	1.5	0.62	5.94	Yes	No	No	No
No	Mal	65	170	71	80	No	No	No	No	No	No							No	No	No	No	No	No	No	No		No	No	Yes	No	No	<0.50	13.78	5.83	204	4.48	143	38	98.3	11.5	21.2	2.47	0.9	0.17	4.93	Yes	No	No	No
No	Mal	65	161	56	80	No	No	No	No	Yes	No							No	No	No	No	No	No	No	No		No	No	No	No	No	2.08	24.97	3.88	135	4.15	136	43.5	49.3	14.4	40.9	2.68	0.6	0.43	4.47	No	No	No	No
No	Mal	72	160	57	60	No	No	No	No	Yes	No	4	3	1	T4N3M1	Ⅳ		No	Yes	No	No	Yes	No	No	No		No	No	No	No	No			5.45	161	3.15	87	32.96	132.4	13.4	29.3	2.3	37.3	>10.00	3.37	No	No	No	No
No	Mal	69	165	45	70	No	No	No	No	Yes	No	4	0	0	T4N0M0	Ⅱ	[pT4N0MOⅡ期]	No	No	No	No	Yes	No	No	No		No	No	No	No	No	1.73	4.97	4.03	192	3.36	100	41.8	62	10.7	23.3	3.66	1.7	0.45	3.69	Yes	No	No	No
No	Fem	54	145	50	70	No	No	No	No	Yes	No	4	1	0	T4N1M0	Ⅲ	[pT4aN1M0IIIa期]	No	No	Yes	No	Yes	No	No	No		No	No	No	No	No	0.53	12.76	5.03	370	4.23	117	41	29.7	11.6	25	2.4	2.6	0.77	4.15	No	No	No	No
No	Mal	68	171	66	80	No	No	No	No	Yes	No	4	1	1	T4N1M1	Ⅳ	[cT4N1M1Ⅳ期]	Yes	No	No	No	Yes	No	No	No		No	No	Yes	No	No	<0.50	7.59	3.78	158	4.49	132	36.4	68.8	10.9	24.3	3.44	5.5	1.67	4.69	Yes	No	No	No
No	Fem	33	155	50	90	No	No	No	No	Yes	No	4	3	1	T4N3M1	Ⅳ	[cT4N3M1Ⅳ期]	No	No	No	No	No	No	No	No		Yes	No	Yes	No	No	1.45	7.65	12.2	348	4.27	120	37.9	47.7	12.6	25.9	6.37	3.6	0.85	0.65	Yes	No	No	No
No	Fem	68	150	59	70	No	Yes	No	No	Yes	Yes	4	2	1	T4N2M1	Ⅳ	[cT4N2M1Ⅳ期]	No	No	No	No	Yes	No	No	No		No	No	No	No	No	6.35	348.02	9.19	280	2.82	90	31.1	76.2	12.8	24.7	2	7.9	1.47		Yes	Yes	No	No
No	Fem	52	162	54.5	80	No	No	No	No	Yes	No	X	X	1	TXNXM1	Ⅳ	[cTxNxM1IV期]	Yes	No	Yes	No	Yes	No	No	No		Yes	No	No	No	No	>100.00	7.28	5.07	316	3.66	106	45.6	37	12.7	41.8	6.19	0.9	0.3	4.46	Yes	No	No	No
Yes	Mal	79	165	52	70	No	Yes	No	No	No	Yes							No	No	No	No	No	No	No	No		No	No	No	No	No	1.18	5.23	5.97	328	3.47	90	39.8	73.3	12.6	29.8	3.35	2.3	0.58	4.92	Yes	No	No	No
No	Mal	62	167	50	80	No	No	No	No	Yes	No	4	3	1	T4N3M1	Ⅳ	[rT4N3M1ⅣB期]	No	No	No	No	Yes	No	No	No		No	No	No	No	No	21.69	18701	6.73	240	4.07	95	37.4	65.5	12.6	25.1	2.51	25.3	>10.00		No	No	No	No
No	Mal	61	166	52.5	90	No	No	No	No	Yes	No	X	X	X	TXNXMX		[cTxNxMx]	No	No	No	No	No	No	No	No		No	No	No	No	No	0.85	13.53	8.14	215	4.42	123	45.07	52.1	11.7	28.6	2.94	1.2	0.24	5.49	No	No	No	No
No	Mal	69	162	60	80	No	No	No	No	Yes	No	4	2	1	T4N2M1	Ⅳ	[cT4N2M1Ⅳ期]	No	No	No	No	Yes	No	No	No		Yes	No	No	No	No	>100.00	535.87	7.33	236	3.76	113	34.5	86.6	13.1	30.1	1.59	141.2	>10.00	7.31	Yes	No	No	No
No	Fem	59	159	63	80	No	No	No	No	No	No							No	No	No	No	No	No	No	No		No	No	No	No	No	1.23	16.2	4.68	205	3.91	118	45.53	38.1	10.4	24.2	2.55	1.6	0.26	4.32	No	No	No	No
No	Fem	55	155	60	90	No	No	No	No	No	No							No	No	No	No	No	No	No	No		No	No	No	No	No	<0.50	11.37	5.54	272	3.38	122	42.2	51.8	10.9	28.6	3.12	1.2	0.34		Yes	No	No	No
No	Fem	81	153	40	60	No	No	No	No	Yes	No					Ⅳ		No	No	No	No	Yes	No	Yes	No		No	No	No	No	No	3.46	52.15	18.79	477	3.19	75	25.1	42.5	13.6	29.3	3.5	5.5	1.88		No	No	No	No
No	Mal	81	165	72	80	No	No	No	No	Yes	No	4	3	1	T4N3M1	Ⅳ	[cT4bN3M1IV期]	No	No	No	No	Yes	No	No	No		Yes	No	No	No	No	18.13	1519.6	8.19	194	4.04	127	34.7	72.6	10.8	24	5.1	3.3	0.78	1.55	Yes	No	No	No
No	Mal	66	172	47	70	No	No	No	No	Yes	No	4	1	0	T4N1M0	Ⅲ	[pT4bN1M0ⅢB期]	No	No	No	No	Yes	No	No	No		Yes	No	Yes	No	No	3.29	14.11	5.96	206	4.16	116	39	67.2	12.4	25.7	3.18	4.8	0.83	5.5	No	No	No	No
No	Fem	61	150	63	90	No	Yes	No	Yes	Yes	No	3	1	0	T3N1M0	Ⅲ	[cT3N1M0GxⅢA期]	No	No	No	No	No	No	No	No		No	No	Yes	No	No	<0.50	16.95	6.08	226	4.17	130	41	54.6	10.2	20.7	3.01	1.6	0.52	5.13	No	No	No	No
No	Mal	50	171	80	80	No	No	No	No	Yes	No	4	X	1	T4NXM1	Ⅳ	[cT4N3M1CⅣC期]	Yes	No	Yes	No	Yes	No	No	No		Yes	No	Yes	No	No	0.76	10.86	4.66	211	5.5	135	34.3	73.9	10.9	25.3	3.37	2.1	0.61	4.59	Yes	Yes	No	No
No	Mal	63	159	46	80	No	No	No	No	Yes	Yes	4	0	0	T4N0M0	Ⅱ		No	No	No	No	No	No	No	No		Yes	No	No	No	No	2.2	32.82	5.04	121	4.33	143	43.67	49.1	10.7	26.2	2.09	1.5	0.29	5.96	No	Yes	No	No
No	Mal	49	157	46	90	No	No	No	No	Yes	No	4	2	1	T4N2M1	Ⅳ		No	No	No	No	Yes	No	No	Yes		Yes	No	Yes	No	No	4.73	>700.00	7.04	443	4.29	77	26.3	58	11.6	24.3	4.26	3.5	0.71		Yes	No	No	No
No	Mal	73	170	72	80	No	No	No	No	Yes	Yes	4	3	0	T4N3M0	Ⅲ	[pT4aN3aM0ⅢB期]	No	No	Yes	No	Yes	Yes	Yes	No		Yes	No	Yes	No	No	2.49	6.54	4.67	122	4.95	111	40	76.6	11.6	28.2	2.23	1.2	0.18	3.3	Yes	No	No	No
No	Fem	65	150	43	70	No	Yes	No	Yes	Yes	No	X	3	1	TXN3M1	Ⅳ		Yes	No	Yes	No	Yes	No	No	No		Yes	No	Yes	No	No	1.04	554.96	8.37	244	3.91	97	40.61	47.7	12.5	22.6	2.38	37.6	>10.00	3.47	No	Yes	No	No
No	Mal	65	164	63	70	No	No	No	Yes	Yes	Yes	4	0	0	T4N0M0	Ⅱ		No	No	No	No	No	No	No	No		No	No	No	No	No	2.12	438.51	8.66	177	4.88	160	44.1	74.8	12	28.8	2.68	1.1	0.14	3.73	Yes	No	No	No
No	Mal	53	168	64.5	90	No	No	No	No	Yes	No							No	No	No	No	No	No	No	No		No	No	Yes	No	No	1.47	8.89	4.1	199	5.23	160	48.84	83.9	10.9	30.6	2.25	0.8	0.14		Yes	No	No	No
No	Fem	65	148	54.5	70	No	No	No	No	Yes	Yes	X	3	1	TXN3M1	Ⅳ	[TxN3M1IV期]	No	No	No	No	Yes	No	No	No		Yes	No	No	No	No	2.36	3657.8	4.07	321	3.18	71	37.9	47.9	13	25.3	4.94	5.2	1.46		No	Yes	No	No
No	Mal	65	148	58	90	No	No	No	No	Yes	Yes	3	1	0	T3N1M0	Ⅲ		No	No	No	No	No	No	No	No		No	No	Yes	No	No	38.14	8.32	5.78	255	4.06	121	43.61	96	10.9	24.4	2.96	1.2	0.35	5.64	Yes	No	No	No
No	Mal	72	165	54	70	No	No	Yes	No	No	Yes	is	0	0	TisN0M0	Ⅰ	[PTisN0M0I期]	No	Yes	No	No	No	No	Yes	No		Yes	No	Yes	No	No	1.47	15.15	5.05	181	4.96	117	36.8	62.4	13	32.2	3.23	2.2	0.54	3.66	Yes	No	No	No
No	Fem	56	160	52	100	No	No	No	Yes	Yes	No					Ⅳ		No	No	No	No	No	No	No	No		Yes	No	Yes	No	No	3.16	1.24	4.55	149	4.09	114	42.54	50.9	13.1	27.4	2.05	1.6	0.3		Yes	No	No	No
No	Fem	68	150	54	90	No	No	No	No	No	Yes							No	No	No	No	Yes	No	No	No		No	No	Yes	No	No			4.45	167	3.97	91	36.7	54.2	10.4	29.3	2.47	3	0.95	3.31	Yes	No	No	No
No	Mal	61	165	57	80	No	No	No	No	Yes	No	3	0	0	T3N0M0	Ⅲ		No	No	No	No	No	No	No	No		No	No	No	No	No	1.15	13.75	5.7	111	5.4	165	30.4	58.2	12.7	33	2.76	9.2	3.46		No	No	No	No
No	Fem	82	153	58	80	No	No	No	No	Yes	No	4	2	0	T4N2M0	Ⅲ		No	No	No	No	No	No	No	No		No	No	No	No	No	6.45	86.22	5.12	117	3.23	102	41.96	91.3	11.1	26.4	2.8	1.02	0.21		No	No	No	No
No	Fem	44	151	55.5	80	No	No	No	No	Yes	Yes	4	3	1	T4N3M1	Ⅳ	[cT4N3bM1IVb期]	No	No	No	No	Yes	No	No	No		No	No	Yes	No	No	>100.00	6.99	7.65	259	2.68	80	27.4	30.2	12.6	24.6	4.03	18.1	5.06	0.64	Yes	No	No	No
No	Mal	64	157	52	90	No	No	Yes	No	Yes	No	3	0	0	T3N0M0	Ⅱ	[cT3N0M0]	No	No	No	No	Yes	No	No	No		No	No	No	No	No	1.13	9.73	5.24	585	3.53	76	30.9	54.2	11.8	26.4	2.51	3.4	0.9		No	No	No	No
No	Mal	60	165	38	50	No	No	No	No	No	No	4	X	1	T4NXM1	Ⅳ	[pT4aNxM1IV期]	No	No	No	No	No	No	Yes	No		No	No	No	No	No	1.73	5.48	15.05	136	3.26	124	32.65	57.4	12.7	31.1	2.29	14.3	4.62	2.64	No	No	No	No
No	Mal	76	155	49	60	No	No	No	No	Yes	No	X	X	1	TXNXM1	Ⅳ	[cTxNxM1IV期]	No	No	No	No	No	No	No	No		No	No	No	No	No	6.8	81.88	5.85	324	4.46	133	39.4	69.4	11.7	27.5	4.94	4.6	0.95	4.34	Yes	No	No	No
No	Mal	49	165	64	80	No	No	No	No	Yes	No	3	0	1	T3N0M1	Ⅳ		No	No	No	No	Yes	No	Yes	No		Yes	No	No	No	No	1092	194.29	14.78	436	3.72	97	32.3	74.3	13.4	32.1	6.01	27.2	8.03	3.7	Yes	Yes	No	No
No	Mal	79	165	61	90	No	Yes	No	No	Yes	No	4	x	0	T4NxM0	Ⅲ		No	No	No	No	Yes	No	No	No		Yes	No	Yes	No	No	9.31	>700.00	11.68	265	4.19	130	34.3	93.7	11.5	30.3	4.54	<2.50	0.26	2.72	Yes	No	No	No
No	Fem	47	162	64	90	No	No	No	No	No	Yes							No	No	No	No	Yes	No	No	No		No	No	No	No	No			5.35	243	3.77	110	47.5	42.6	10.8	23.2	2.87	1.6	0.27	4.44	Yes	No	No	No
No	Mal	63	166	53	80	No	No	No	No	Yes	No	4	3	1	T4N3M1	Ⅳ	[cT4N3M1IV期]	No	No	Yes	No	Yes	No	Yes	No		Yes	No	Yes	No	No	<0.50	13.35	6.32	145	3.81	131	39.5	50.8	11.6	22.9	1.77	4.5	1.16	3.26	No	Yes	No	No
No	Fem	60	170	76	90	No	No	No	Yes	Yes	No	1	0	0	T1N0M0	Ⅰ	[T1aN0M0IA期]	No	No	No	No	No	No	No	No		No	No	No	No	No	0.68	6.09	5.51	232	4.57	138	46.8	57.1	11.2	27.4	2.48	1.3	0.28	5.57	Yes	No	No	No
No	Mal	66	156	67	90	No	No	No	No	Yes	Yes	1	0	0	T1N0M0	Ⅰ		No	Yes	No	No	Yes	No	No	No		No	No	Yes	No	No	<0.50		5.25	170	4.67	147	44.6	77.1	11.4	25.5	2.26	1.1	0.23	4.27	Yes	No	No	No
No	Mal	66	174	52	90	No	Yes	No	Yes	Yes	No	4	X	1	T4NXM1	Ⅳ	[cT4NxM1IV期]	No	No	No	No	No	No	No	No		No	No	No	No	No	19.63	22.43	6.06	189	3.74	134	29.5	95.1	9.9	21.2	4.03	11.1	3.87		No	No	No	No
No	Mal	75	174	63	80	No	No	No	No	Yes	Yes	4	3	0	T4N3M0	Ⅲ	[pT4aN3aM0IIIC期]	No	Yes	No	No	Yes	No	Yes	No		No	No	Yes	No	No	2	53.18	7.83	161	4.35	144	32.85	76.7	13.3	21.8	2.6	31.8	9.89	4.2	Yes	No	No	No
No	Mal	57	170	60	90	No	No	No	No	Yes	Yes	4	1	1	T4N1M1	Ⅳ	[sT4bN1M1P1]	Yes	No	Yes	No	No	No	Yes	No		No	No	Yes	No	No	2.55	13.67	5.38	254	4.87	146	39.7	68	11.7	27.5	2.51	1.2	0.24	5.08	Yes	No	No	No
No	Fem	53	145	85	90	No	No	No	No	No	No							No	No	No	No	Yes	No	No	No		No	No	Yes	No	No	1.44	15.21	7.5	241	4.24	130	42.7	53.2	10.6	24.5	2.91	1.1	0.28	4.43	No	No	No	No
No	Mal	46	163	46	80	No	Yes	No	No	Yes	No	X	X	X	TXNXMX		[cTxNxMx]	No	No	No	No	No	No	No	No		No	No	No	No	No	52.74	213.83	7.56	158	4.67	131	42.68	108.9	12.4	35.2	4.54	5.1	1.25	4.74	Yes	No	No	No
No	Fem	46	150	54	80	No	No	No	No	Yes	No	4	X	0	T4NXM0	Ⅲ		No	No	No	No	Yes	No	No	No		Yes	No	No	No	No	0.57	87.5	5.75	472	2.74	72	33.7	42.6	11.1	26.4	4.38	4.5	1.13		No	No	No	No
No	Fem	83	150	44	80	No	Yes	No	No	Yes	No	X	0	1	TXN0M1	Ⅳ		No	Yes	No	No	Yes	No	No	No		No	No	No	No	No	1.54	1.48	6.88	218	2.31	67	35.45	75.1	12.6	30.7	3.73	7.2	2.01	2.98	No	No	No	No
No	Mal	61	160	63.5	90	No	No	No	No	Yes	No	3	1	0	T3N1M0	Ⅲ		No	No	No	No	No	No	No	No		No	No	Yes	No	No	4.5		4.15	346	3.9	95	35.5	80.6	11.5	27.9	4.51	1.3	0.44	4.22	Yes	No	No	No
No	Mal	52	170	44.5	80	No	No	No	No	Yes	No	4	3	0	T4N3M0	Ⅲ	[pT4aN3aM0ⅢB期]	No	No	No	No	Yes	No	No	No		Yes	No	Yes	No	No	<0.50	6.26	5.15	151	3.85	123	37.4	67.6	10.6	23.2	2.11	8.6	2.22	4.27	No	Yes	No	No
No	Fem	54	150	58	90	No	No	No	No	No	No	X	X	1	TXNXM1	Ⅳ	[rTxNxM1IV期]	No	No	No	No	Yes	No	No	No		Yes	No	Yes	No	No	1.63	4.71	7.49	179	4.43	134	46	36.8	11.1	22.3	4.79	3.2	0.93		Yes	Yes	No	No
No	Fem	54	159	53	90	No	No	No	No	No	No	2	0	0	T2N0M0	Ⅰ	[pT2N0M0Ⅰb期]	No	No	No	No	No	No	No	No		No	No	No	No	No	<0.50	11.44	5.58	165	3.57	113	40.5	52.1	12.6	39.4	2.29	1	0.11		Yes	Yes	No	No
Yes	Mal	70	165	60	70	No	No	No	No	No	No					Ⅳ		Yes	No	Yes	No	No	No	Yes	No		No	No	Yes	No	No			5.95	287	4.11	121	31.41	85.3	13.8	31.5	3.1	5.4	1.43	3.26	Yes	No	No	No
No	Fem	71	150	67	70	No	Yes	No	No	Yes	No	4	2	1	T4N2M1	Ⅳ	[cT4bN2-3M1IV期]	Yes	No	No	No	No	No	No	Yes		No	No	No	No	No	0.59	10.2	8.94	428	4	124	42.86	55.5	10.9	22.2	4.03	5.2	1.59	5.99	No	No	No	No
No	Fem	63	152	49	80	No	No	No	No	Yes	Yes	2	0	0	T2N0M0	Ⅰ	[pT2N0M0I期]	No	No	No	No	No	No	No	No		No	No	No	No	No	0.67	19.19	5.37	175	4.43	138	44.3	64.7	10.9	23.9	2.73	0.6	0.2	4.32	Yes	No	No	No
No	Fem	50	159	57	90	No	No	No	No	Yes	No	X	X	1	TXNXM1	Ⅳ	[cTxNxM1IV期]	No	No	Yes	No	Yes	No	No	No		Yes	No	Yes	No	No	>100.00	4.33	7.09	154	3.36	108	42.6	48.7	11.3	26.4	1.2	76.8	>10.00	4.78	Yes	No	No	No
No	Mal	66	168	68	90	No	No	No	No	No	Yes							No	No	Yes	No	Yes	No	No	No		No	No	No	No	No	0.83	21.58	7.53	364	4.66	101	42.8	79.7	11.1	26.5	6.01	2.6	0.61	5.64	Yes	No	No	No
No	Fem	77	145	34	80	No	Yes	No	No	Yes	No	4		0		Ⅲ		No	No	Yes	No	Yes	No	No	No		No	No	No	No	No	<0.50	7.08	6.96	211	3.6	115	38.8	47.1	9.7	27.9	2.97	<2.50	0.57	6.64	Yes	No	No	No
No	Fem	76	150	68	70	No	No	No	No	No	No	3	1	0	T3N1M0	Ⅱ	[cT3N1M0II期]	No	No	No	No	No	No	No	No		No	No	Yes	No	No	10.22	32.53	4.02	146	3.79	119	47.6	54.3	12	24	3.58	1.9	0.51	3.88	Yes	No	No	No
No	Mal	73	165	55	90	No	Yes	No	No	Yes	No					Ⅳ		No	Yes	No	No	Yes	No	No	No		Yes	No	Yes	No	No	0.53	1.8	8.97	371	4.19	119	25.2	91.9	13.1	32.8	4.67	2.9	1.03	4.74	Yes	No	No	No
No	Fem	77	155	45	90	No	Yes	No	No	Yes	Yes	4	X	1	T4NXM1	Ⅳ	[cT4aNxM1IV期]	No	No	No	No	No	No	No	No		No	No	Yes	No	No	0.81	43.55	5.19	289	4.06	118	40.4	44.3	10.7	29.1	3.06	0.4	0.41		Yes	No	No	No
No	Fem	74	153	57	80	No	No	No	No	No	No	1	0	0	T1N0M0		[T1N0M0]	No	No	No	No	No	No	No	No		No	No	No	No	No	0.7	7.07	6.14	178	3.84	117	43	47.7	10.9	26.7	4.03	2.1	0.15	5.22	Yes	No	No	No
No	Mal	67	159	57	90	No	No	No	No	Yes	Yes	4	2	0	T4N2M0	Ⅲ	[pT4N2M0IIIB期]	Yes	No	No	No	Yes	No	No	No		No	No	Yes	No	No	1.08	13.68	6.92	165	4.3	140	39.6	80.4	10.8	29.2	2.89	1.1	0.17	6.1	Yes	No	No	No
No	Mal	69	164	68	80	No	No	No	No	Yes	Yes							No	No	No	No	Yes	No	No	No		Yes	No	Yes	No	No	4.06		7.2	329	3.05	60	30.7	59	13.8	24.6	4.35	<2.50	0.52	2.73	Yes	No	No	No
No	Mal	83	161	62	60	No	Yes	No	No	Yes	Yes							No	Yes	No	No	Yes	No	No	No		No	No	No	No	No	57.75	13.12	5.1	173	2.74	59	33.49	62.1	15	37.8	4.23	8.2	0.66	1.64	No	No	No	No
No	Fem	67	142	47	80	No	No	No	No	Yes	No							No	No	Yes	No	Yes	No	No	No		No	No	Yes	No	No	0.62	7.52	3.03	218	3.12	100	34.5	49.4	10.8	22.5	3.71	5.8	1.63		Yes	No	No	No
No	Mal	65	158	61	90	No	No	No	No	Yes	Yes	2	0	0	T2N0M0	Ⅰ	[pT2N0M0Ⅰ期]	No	Yes	No	No	Yes	No	No	No		No	No	Yes	No	No	2.41	7.78	5.26	252	4.2	133	35.7	46.2	11.8	28.7	2.59	1.2	0.14	5.17	Yes	No	No	No
No	Fem	47	168	65	70	No	No	No	No	Yes	No	1	0	0	T1N0M0	Ⅳ	[pT1aN0M0ⅠA期]	No	No	No	No	No	No	No	No		No	No	No	No	No	1.74	19.51	4.45	248	4.43	128	48.4	60.9	12.6	27.6	2.93	1.7	0.13	5.16	Yes	No	No	No
No	Mal	81	158	46.5	90	No	Yes	No	No	Yes	No	4	2	0	T4N2M0	Ⅲ		No	No	No	No	No	No	No	No		No	No	No	No	No	2.98	>700.00	5.61	269	2.9	92	29.3	61.7	10.8	23.9	3.58	13	4.07	0.67	Yes	No	No	No
No	Mal	72	151	53	80	No	No	No	No	Yes	No	3	X	0	T3NXM0	Ⅲ	[pT3NxM0Ⅱ-Ⅲ期]	No	No	No	No	Yes	No	No	No		No	No	No	No	No	2.39	16.76	8.06	287	3.32	86	34.6	82.8	10.7	27.9	3.32	2	0.28	4.74	No	No	No	No
No	Mal	73	162	45	70	No	No	No	No	Yes	Yes	4	1	1	T4N1M1	Ⅳ	[cT4N1M1Ⅳ期]	No	No	No	No	Yes	No	No	No		No	No	No	No	No	2.51	11.35	4.65	340	3.25	82	19.38	68.5	11.7	24.5	2.81	8.5	2.51	4.68	Yes	No	No	No
No	Fem	56				No	No	No	No	No	No							No	No	No	No	No	No	No	No		No	No	No	No	No	0.85	5.15	6.03	263	4.43	108	41.5	49.4	11.3	26	2.94	0.8	0.06	5.33	No	No	No	No
No	Mal	58	165	54	80	No	No	No	No	No	Yes	4	0	0	T4N0M0	Ⅲ		No	No	Yes	No	Yes	No	No	No		No	No	Yes	No	No	2.48	8.41	4.24	167	4.42	114	39	58.9	11.4	27.3	3.07	0.8	0.16	2.28	Yes	No	No	No
No	Fem	44	153	50	90	No	No	No	No	No	Yes							No	No	No	No	Yes	No	No	No		No	No	Yes	No	No	0.88	5.98	3.79	191	3.52	87	38.4	56.2	11.3	38.2	2	1.6	0.3		Yes	No	No	No
No	Mal	68	157	50	90	No	No	No	No	Yes	No	4	3	1	T4N3M1	Ⅳ	[cT4N3M1IV期]	No	Yes	No	No	Yes	No	No	No		No	No	No	No	No	1.3	109.91	4.95	177	3.11	108	39.2	95.4	12.8	27.2	3.74	24.4	0.33		Yes	No	No	No
No	Mal	64	165	55	70	No	No	No	No	Yes	No	X	3	1	TXN3M1	Ⅳ	[cTxN3M1Ⅳ期]	No	Yes	No	No	Yes	No	No	No		Yes	No	No	No	No	>100.00	204	10.71	301	3.75	107	34.89	71.5	11.2	22	2.76	30.6	>10.00	5.14	Yes	No	No	No
No	Mal	48	165	54	80	No	No	No	No	Yes	No							No	No	No	No	No	No	Yes	No		Yes	No	No	No	No	2.28	17.75	4.18	204	3.3	106	34.5	62.7	11.8	29.2	2.23	1.2	0.21	3.27	Yes	No	No	No
No	Mal	48	169	60	90	No	No	No	No	Yes	No	4	2	X	T4N2MX		[cT4bN1-2Mx]	No	No	No	No	Yes	No	No	No		Yes	No	Yes	No	No	2.1	<1.20	10.29	240	4.19	134	39.6	54.4	13.7	32	5.18	1.9	0.4	4.31	No	No	No	No
No	Fem	47	154	63	60	No	No	No	No	Yes	No					Ⅳ		No	No	No	No	No	No	No	No		Yes	No	Yes	No	No	0.5	14.55	5.77	211	3.96	140	28.84	45	12.1	29.1	5.68	5.6	1.66		Yes	Yes	No	No
No	Fem	44	162	59	80	No	Yes	No	No	Yes	Yes	4	1	1	T4N1M1	Ⅳ		No	No	Yes	No	Yes	No	No	No		No	No	Yes	No	No	0.9	19.34	4.45	217	3.7	90	36.2	37.1	11.2	25.8	2.07	<2.50	<0.19	3.18	Yes	No	No	No
No	Mal	66	161	60	90	No	No	No	No	Yes	Yes	1	0	0	T1N0M0	Ⅰ	[pT1bN0M0IA期]	No	No	No	No	Yes	No	No	No		No	No	Yes	No	No	5	35.68	3.24	138	4.38	152	39.82	73.7	11.4	27	2.26	1.2	0.12	3.32	Yes	No	No	No
No	Fem	55	163	56	70	No	No	No	No	No	No							No	No	No	No	Yes	No	No	No		No	No	No	No	No	0.73	4.43	7.54	379	3.42	94	41.52	64.3	13.9	34.5	4.51	15.4	4.32	4.44	Yes	No	No	No
Yes	Fem	79	150	55	70	No	Yes	Yes	Yes	No	Yes	4	1	0	T4N1M0	Ⅲ	[cT4N1M0Ⅲ期]	No	No	No	No	Yes	No	No	No		No	No	No	No	No	1.87	<1.20	11.08	369	2.87	87	37.8	133	12.2	23.6	5.38	8.1	2.85	2.79	No	No	No	No
No	Mal	64	169	48	80	No	No	No	No	Yes	No							No	No	No	No	No	No	No	No		No	No	No	No	No			4.59	185	4.12	131	41.62	52.8	11.9	32.1	2.6	1.2	0.26		No	No	No	No
No	Mal	46	165	53	80	No	No	No	No	Yes	No	3	1	0	T3N1M0	Ⅲ		No	No	Yes	No	No	No	No	No		No	No	Yes	No	No	<0.50		9.85	202	4.1	131	40.66	44.2	12	27.9	2.62	1.9	0.27		Yes	No	No	No
No	Mal	76	160	58	80	No	No	No	No	Yes	Yes	4	2	0	T4N2M0	Ⅲ	[pT4N2M0IIIB期]	No	No	No	No	Yes	No	No	No		No	No	Yes	No	Yes	1.22	8.54	4.97	287	2.88	88	36.94	95.1	12.1	23.1	4.14	3	0.54	4.06	Yes	No	No	No
No	Fem	64	150	38	80	No	No	No	No	Yes	No	X	X	1	TXNXM1	Ⅳ		No	No	No	No	No	No	No	No		Yes	No	No	No	No	>100.00	>700.00	4.99	198	4.74	124	39.8	61.7	11.2	21.5	3.51	2.2	0.32	5.05	Yes	Yes	No	No
No	Fem	72	143	45	90	No	Yes	No	No	No	No	1	0	0	T1N0M0	Ⅰ	[T1NOMOI期]	No	No	No	No	No	No	No	No		No	No	No	No	No	0.63	2.72	5.13	263	4.43	144	44.3	39.6	10.9	26.5	1.91	1	0.22	6.35	Yes	No	No	No
No	Mal	60	165	43.5	70	No	No	No	No	Yes	Yes	4	3	0	T4N3M0	Ⅲ	[pT4aN3aM0IIIc期]	No	No	Yes	No	Yes	No	No	No		No	No	Yes	No	No	23.95	173.55	4.39	377	3.9	96	34.4	47.9	11.5	32	2.03	4.1	1.05	4.03	Yes	No	No	No
No	Mal	68	155	59	90	No	No	No	No	Yes	Yes	3	1	0	T3N1M0	Ⅲ		No	No	Yes	No	Yes	No	No	No		No	No	Yes	No	No	0.74	6.22	6.25	163	4.2	128	38.73	71.3	11.1	25.7	3.03	2	0.28	5.98	Yes	No	No	No
No	Mal	81	155	40	70	No	No	No	No	Yes	No	4	X	X	T4NXMX		[cT4NxMx]	No	No	No	No	Yes	No	Yes	No		No	No	No	No	No	2.07	14.54	4.59	219	2.94	77	36.6	78.8	11.1	26.2	3.31	4.6	1.14	3.99	No	No	No	No
No	Mal	53	171	58	80	No	No	No	No	Yes	No							No	No	No	No	Yes	No	No	No		No	No	No	No	No	<0.50	1.23	4.14	136	3.05	78	28.1	59.2	12.8	34.5	4.14	2.7	0.54	2.12	Yes	No	No	No
No	Fem	44	160	51.5	80	No	No	No	No	No	No							No	No	No	No	No	No	No	No		No	No	No	No	No	1.66	20.43	5.61	192	3.29	115	45.96	39.9	11.9	29	2.13	1.2	0.09		Yes	No	No	No
No	Fem	53				No	No	No	No	Yes	No	4	3	1	T4N3M1	Ⅳ	[T4aN3aM1IV期]	No	No	No	No	No	No	No	Yes		Yes	No	No	No	No	11.22	540.43	5.12	151	3.24	108	30.7	73.2	14	29.6	1.71	18.2	5.01	0.67	Yes	Yes	No	No
No	Mal	68	166	63	90	No	No	No	No	Yes	No	X	X	1	TXNXM1	Ⅳ	[cTxNxM1Ⅳ期]	No	No	No	No	No	No	No	No		Yes	No	No	No	No	3.77	30.22	6.25	243	3.9	122	37.72	83.9	10.7	21.9	3.47	15	4.42	5.32	No	No	No	No
No	Mal	82	167	60	70	No	No	No	No	Yes	No	4	2	X	T4N2MX	Ⅲ	[ⅢA期cT4aN2Mx]	Yes	No	No	No	No	No	Yes	No		Yes	No	No	No	No	252	6.68	10.1	174	4.18	125	35.8	83.2	14.1	30.4	2.5	12	4.04	4.11	No	Yes	No	No
No	Mal	68	168	70	90	No	No	No	No	Yes	No	3	X	0	T3NXM0		[cT3NxM0]	No	No	No	No	No	No	No	No		No	No	No	No	No	2.14	153.84	6.51	260	4.52	151	44.07	184.3	10.8	22.5	3.71	5.9	1.35	3.82	No	No	No	No
No	Mal	66	161	65	80	No	Yes	No	No	Yes	Yes	4	2	1	T4N2M1	Ⅳ	[rT4N2M1IV期]	No	No	No	No	Yes	No	No	No		Yes	No	Yes	No	No	0.55	189.21	6.69	152	4.48	128	38	37.4	12	30	4.28	25.3	7.25	5.18	Yes	Yes	No	No
No	Mal	69	175	54	70	No	Yes	No	No	Yes	No	3	3	1	T3N3M1	Ⅳ		Yes	No	Yes	No	Yes	No	No	No		Yes	No	Yes	No	No	144.2	48.16	7.52	124	4.07	129	39.05	57.7	12.9	32.3	3.31	3.7	1	4.98	No	Yes	No	No
No	Fem	67	160	64	70	No	Yes	No	No	Yes	Yes	3	X	0	T3NXM0	Ⅱ	[CT3NxM0II期]	No	No	Yes	No	Yes	No	No	No		No	No	No	No	No	13.14	4.21	6.37	272	3.68	125	37.5	43.1	10.6	19.9	4.81	5	2.06	5.21	No	No	No	No
No	Mal	71	168	50.5	80	No	Yes	No	No	No	Yes	4	0	0	T4N0M0	Ⅱ		No	No	No	No	Yes	No	No	No		Yes	No	No	No	Yes	4.83	8.36	4.47	216	2.41	82	30.6	79.7	10.5	25.9	2.33	4.2	1.17	3.69	No	Yes	No	No
No	Mal	73	160	48	70	No	No	No	No	Yes	No	4	X	0	T4NXM0	Ⅲ	[CT4bNxM0III期]	No	No	No	No	Yes	No	No	No		Yes	No	Yes	No	No	1.11	182.41	5.94	376	2.61	85	33.8	73.4	12.6	27.1	3.12	1.4	0.11	3.61	Yes	Yes	No	No
No	Fem	53	153	53	90	No	No	No	No	Yes	Yes	4	x	x	T4NxMx	Ⅲ		No	No	No	No	Yes	No	No	No		No	No	No	No	No	<0.50	41.4	3.67	41	2.58	81	41.77	80.9	10.6	25.9	5.64	<2.50	1.71	4.42	No	No	No	No
No	Mal	62	175	53	80	No	No	No	No	Yes	Yes	4	3	1	T4N3M1	Ⅳ	[pT4bN3aM1]	No	No	No	No	Yes	No	No	No		Yes	No	Yes	No	No	4.22	8.48	4.88	189	3.84	125	40.9	70.5	11.4	24.1	2.91	0.4	0.15	5.02	Yes	No	No	No
No	Fem	48				No	No	No	No	No	Yes	2	0	0	T2N0M0	Ⅱ		No	No	No	No	No	No	No	No		No	No	Yes	No	No	0.85	7.5	4.61	307	3.3	105	38.2	44.6	10.8	21	2.86	1.6	0.27		Yes	No	No	No
No	Mal	59	170	75	70	No	No	No	No	Yes	No	1	1	X	T1N1MX			No	No	No	No	No	No	No	No		No	No	No	No	No	0.99	12.16	7.9	478	4.74	110	48.19	76.6	11.8	27.3	8.06	15	3.32	5.12	No	No	No	No
No	Mal	61	165	58	90	No	No	No	No	Yes	Yes	4	2	0	T4N2M0	Ⅲ	[pT4aN2M0ⅢA期]	No	No	No	No	Yes	No	Yes	No		Yes	No	Yes	No	No	0.61	6.51	4.48	182	4.03	125	37.2	69.6	10	23.3	4.31	2.1	0.46	3.4	Yes	No	No	No
No	Mal	67	160	64	90	No	No	No	No	No	No							No	No	No	No	Yes	No	No	No		No	No	No	No	No	1.24	11.7	5.6	545	3.81	90	34.8	69.9	10.8	27	3.25	2.1	0.44		No	No	No	No
No	Mal	55	163	63	80	No	No	No	No	No	Yes	4	2	0	T4N2M0	Ⅲ	[pT4aN2M0ⅢA期]	No	No	No	No	Yes	No	Yes	No		No	No	Yes	No	No	17.94	<1.20	5.69	409	2.95	80	39.39	72.8	12.4	28	4.39	3	0.65	4.76	Yes	No	No	No
No	Mal	80	170	62	80	No	Yes	No	No	Yes	No	3	2	0	T3N2M0	Ⅲ		No	No	Yes	No	Yes	No	No	No		No	No	Yes	No	No	1.46	21.54	5.19	114	4.3	118	39.9	103.6						4.96	Yes	No	No	No
No	Fem	73	153	57	90	No	Yes	No	No	Yes	No	X	X	1	TXNXM1	Ⅳ	[cTxNxM1Ⅳ期]	No	No	Yes	No	Yes	No	No	No		Yes	No	Yes	No	No	11.38	1.53	6.28	286	4.13	108	40.5	49.8	11.9	21.9	3.74	15.4	6.32	6.88	Yes	No	No	No
No	Fem	55	150	38	70	No	No	No	No	Yes	No							No	No	No	No	Yes	No	No	No		No	No	No	No	No	4.12	19.37	4.9	382	3.1	95	25.8	48.7	12	27.5	1.91	2	0.48	2.07	Yes	No	No	No
Yes	Mal	69	159	53	90	No	No	No	No	Yes	Yes	4	X	1	T4NXM1	Ⅳ	[sT4bNxM1IV期]	No	No	No	No	Yes	No	No	No		No	No	Yes	No	No	78.09	590.9	5.93	318	3.6	107	33.4	60.6	11.8	24.4	1.34	8.8	3.05	5.32	Yes	No	No	No
No	Mal	52	170	56	80	No	No	No	No	Yes	No	4	2	0	T4N2M0	Ⅲ	[cT4aN2M0Ⅲ期]	No	No	No	No	No	No	No	No		Yes	No	No	No	No	4.27	37.65	3.9	122	4.51	143	42.44	48.3	10.6	24.1	3.24	2	0.48	5.46	Yes	No	No	No
No	Mal	64	167	55	80	No	Yes	No	No	Yes	No	3	1	0	T3N1M0	Ⅲ	[T3N1M0Ⅲ期]	Yes	Yes	No	No	Yes	No	No	No		No	No	No	No	No	1.24	38.84	9.27	361	3.9	116	33.1	77	12.5	26.4	3.07	11.8	5.19		No	No	No	No
No	Fem	44	150	56	80	No	No	No	No	No	No					Ⅱ		No	No	No	No	No	No	No	No		No	No	No	No	No			5.47	191	3.51	120	36.7	46	10.7	25.4	1.82	2.6	0.39		No	No	No	No
No	Mal	61			60	No	No	No	No	No	Yes							Yes	No	No	No	Yes	No	No	No		No	No	Yes	No	No	<0.50	7.59	7.96	472	1.61	27	33.4	57.1	11.3	26.2	4.95	1.7	0.39	3.8	No	No	No	No
No	Fem	48	160	48	90	No	No	No	No	No	Yes							No	No	No	No	No	No	No	No		No	No	Yes	No	No	<0.50	8.13	5.96	185	4.35	129	41.7	51.9	10.8	26.5	2.78	2.1	0.62		Yes	No	No	No
No	Fem	67	146	40	80	No	No	No	No	No	No	2	0	0	T2N0M0	Ⅰ	[pT2N0M0Ⅰ期]	No	No	No	No	No	No	No	No		No	No	No	No	No	1.6	4.91	2.07	70	4.53	111	40.52	38.1	12.1	25.3	1.67	65.5	>10.00	4.95	Yes	Yes	No	No
No	Fem	66	157	48.5	90	No	Yes	No	No	Yes	Yes	4	2	0	T4N2M0	Ⅲ	[pT4aN2M0ⅢA期]	No	No	No	No	Yes	No	No	No		No	No	Yes	No	No	1.45	7.78	5	324	3.57	86	36.7	57.2	12.5	26.8	3.61	3	0.72	5.42	Yes	No	No	No
No	Fem	63	152	42	70	No	No	No	No	Yes	No	X	X	X	TXNXMX		[cTxNxMx]	No	Yes	No	No	Yes	No	No	Yes		No	No	No	No	No	0.93	10.19	6.42	223	3.42	103	23.4	37.5	11.7	29.3	6.02	3.6	0.91	2.18	Yes	No	No	No
No	Mal	61	166	60	90	No	No	No	No	Yes	Yes	1	0	0	T1N0M0	Ⅰ	[pT1N0M0IA期]	No	Yes	No	No	Yes	No	No	No		Yes	No	Yes	No	No	2.52	15.42	3.43	82	2.3	107	36.5	72.2	11.5	25.5	2.91	1.4	0.19	3.09	Yes	No	No	No
No	Fem	75	140	57.5	80	No	No	No	No	Yes	No	4	X	0	T4NXM0	Ⅲ		No	Yes	No	No	Yes	No	No	No		Yes	No	Yes	No	No	3.6	8.6	6.88	353	3.3	96	43.1	54	10	18.2	3.66	4.5	1.13	6.11	Yes	Yes	No	No
No	Mal	55	170	59	80	No	No	No	No	Yes	No	0	X	1	T0NXM1	Ⅳ	[rT0NxM1IV期]	No	No	Yes	No	No	No	No	No		Yes	No	No	No	No	3.83	20.1	7.46	182	4.38	136	35.2	52.1	13.1	29.5	2.64	2.6	0.79	4.63	Yes	Yes	No	No
No	Mal	75	168	45	90	No	No	No	No	Yes	No	4	X	1	T4NXM1	Ⅳ	[cT4bNxM1ⅣB期]	No	No	No	No	No	No	No	No		Yes	No	No	No	No	56.48	2.41	5.4	208	3.97	127	36.1	62.2	10.3	31.1	4.51	6.1	1.76	4.32	No	Yes	No	No
No	Mal	64	159	52	80	No	No	No	No	Yes	Yes	4	0	0	T4N0M0	Ⅱ	[pT4aN0M0IIb期]	No	No	No	No	Yes	No	Yes	No		Yes	No	No	No	No	37.54	11.96	4.92	266	4.98	152	41.3	54.8	10.3	22.3	4.03	3.6	0.98	5.52	Yes	No	No	No
No	Fem	70	160	50	90	No	No	No	No	No	No							No	No	No	No	No	No	No	No		No	No	Yes	No	No	0.99	5.97	3.79	85	3.8	115	48.4	47.4	9.7	20.5	1.77	1.2	0.5	5.36	Yes	No	No	No
No	Fem	66	163	51	90	No	No	No	No	No	No							No	No	No	No	Yes	No	No	No		No	No	No	No	No	0.85	22.08	3.04	114	2.86	98	35.1	72.7	11	23	2.91	1.7	0.36	3.36	No	No	No	No
No	Mal	82	170	60	90	No	No	No	No	Yes	No	4	X	X	T4NXMX		[cT4bNxMx]	No	No	No	No	No	No	No	No		Yes	No	No	No	No	1.1	7.09	3.36	186	4.09	133	39.97	70.4	10.5	25.4	1.83	14	4.85	4.39	No	Yes	No	No
No	Mal	64	160	57	80	No	No	No	No	Yes	Yes	3	0	0	T3N0M0	Ⅱ	[cT3N0M0ⅡB期]	No	No	Yes	No	Yes	No	No	No		No	No	No	No	No	2.19	8.61	5.31	172	3.62	119	39.2	75.9	11	20.6	3.99	3.1	0.85	5.1	No	No	No	No
No	Mal	83	160	63	80	No	Yes	No	No	Yes	No	4	X	1	T4NXM1	Ⅳ	[cT4NxM1IV期]	No	No	No	No	Yes	No	No	No		No	No	No	No	No	1.94	20.95	4.88	332	4.07	115	44.19	89.3	10.7	18.9	4.42	7.5	1.72	4.54	No	No	No	No
No	Fem	53	150	64	90	No	No	No	No	No	No							No	No	No	No	No	No	No	No		No	No	No	No	No	<0.50	24.79	4.09	257	4.55	136	47.7	51	9.9	25.6	3.19	0.7	0.11	6.02	Yes	No	No	No
No	Mal	71	163	62	80	No	Yes	No	No	Yes	No	3	1	1	T3N1M1	Ⅳ		No	Yes	Yes	No	Yes	No	No	No		Yes	No	Yes	Yes	No	1.77	2.07	6.53	268	4.33	133	47.5	77.6	12.1	27.1	3.94	12.6	0.83	7.5	Yes	No	No	No
No	Fem	55	170	57	80	No	No	No	Yes	No	No							No	No	No	No	No	No	No	No		No	No	No	No	No	0.55	92.76	3.84	239	4.05	128	47.48	35.4	11.2	24.9	2.86	1.3	0.18	5.36	Yes	No	No	No
No	Fem	71	153	52	80	No	Yes	No	No	Yes	No							No	Yes	No	No	Yes	No	No	No		No	No	No	No	No	<0.50	9.46	12.95	396	3.99	108	36	71.2	10.2	32.4	3.31	14	4.48	2.65	Yes	No	No	No
No	Mal	56	158	50	80	No	No	No	Yes	Yes	Yes	4	3	0	T4N3M0	Ⅲ	[cT4bN3M0Ⅲc期]	No	No	No	No	Yes	No	No	No		No	No	No	No	No	7.8	7.77	6.03	369	2.49	53	35.09	57.2	11.3	20.4	2.63	1.5	0.17	2.9	Yes	No	No	No
No	Mal	54	173	45.5	60	No	No	No	No	Yes	No	4	1	0	T4N1M0	Ⅲ		No	No	No	No	Yes	No	No	No		No	No	No	No	No	3.12	16.38	4.76	101	5.16	160	49.41	91.7	10.1	18.9	2.4	2.5	0.21	8.55	Yes	No	No	No
No	Mal	68	163	70	90	No	Yes	No	No	Yes	Yes	2	2	0	T2N2M0	Ⅲ		No	No	Yes	No	No	No	No	No		No	No	Yes	No	No	2.25	22.11	5.08	156	5.33	166	47.66	75.5	10.8	23.6	2.4	1.3	0.27	3.62	Yes	No	No	No
No	Fem	51	158	60	90	No	No	No	No	No	No	1	0	0	T1N0M0	Ⅰ	[cT1N0M0]	No	No	No	No	No	No	No	No		No	No	Yes	No	No			4.91	290	4.82	145	43.3	53	12.1	31	2.2	0.5	0.08		Yes	No	No	No
No	Fem	65	156	44	80	No	No	No	No	Yes	No					Ⅳ		No	Yes	No	No	Yes	No	No	No		No	No	Yes	No	No	<0.50	15.54	7.69	269	3.69	100	34.94	36.9	13.1	22.4	2.55	4.2	0.92	3.49	Yes	No	No	No
No	Mal	63	165	52	80	No	No	No	No	Yes	No	2	3	1	T2N3M1	Ⅳ	[pT2N3aM1L1]	No	No	No	No	No	No	No	No		No	No	Yes	No	No	7.39	>700.00	6.26	349	3.37	108	38.07	61.2	14.1	24.1	4.03	1.5	0.27		No	No	No	No
No	Mal	52	166	47	90	No	No	No	No	Yes	No	3	1	1	T3N1M1	Ⅳ		No	No	No	No	No	No	No	No		No	No	Yes	No	No	1.03		5.78	195	4.68	135	43.8	41.3	10.5	22.1	3.39	0.9	0.27	5.95	Yes	Yes	No	No
No	Mal	63	162	55	70	No	No	No	No	Yes	No	4	2	X	T4N2MX	Ⅳ	[rpT4bN2MxIVA期]	No	No	Yes	No	Yes	No	No	No		Yes	No	Yes	No	No	7.54	111.39	4.47	163	3.36	109	42.2	63.5	11.7	26.3	2.36	1	0.15	3.37	No	Yes	No	No
No	Mal	47	174	70	90	No	No	No	No	Yes	No	4	2	1	T4N2M1	Ⅳ	[cT4N2M1Ⅳ期]	No	No	No	No	No	No	No	No		No	No	No	No	No	59.78	13.74	6.02	312	5.54	160	41.01	73.5	11.7	27.7	3.35	2.6	0.59	3.75	No	No	No	No
No	Mal	74	167	49	60	No	Yes	No	Yes	Yes	No	X	X	1	TXNXM1	Ⅳ	[TxNxM1Ⅳ期]	No	No	No	No	No	No	No	No		Yes	No	No	No	No	44.55	56.66	7.85	474	4.4	130	40.57	62.8	12.3	23.7	4.51	1.6	0.44	3.11	No	No	No	No
No	Mal	46	164	60	90	No	No	No	No	Yes	No	X	X	1	TXNXM1	Ⅳ	[cTxNxM1IV期]	No	No	No	No	No	No	No	No		Yes	No	Yes	No	No	38.38	9.5	5.12	162	3.75	125	39.9	62.1	13.6	23	2.09	3.6	1	4.04	No	Yes	No	No
No	Mal	67	162	65	80	No	No	No	No	Yes	No							No	No	No	No	Yes	No	No	No		No	No	No	No	No	0.71	5.93	9.48	304	4.59	136	41.48	55.6	12.1	20.7	5.68	2.1	0.7	6.24	Yes	No	No	No
Yes	Fem	70	149	46	90	No	No	No	No	Yes	No	4	X	1	T4NXM1	Ⅳ	[cT4aNxM1IV期]	No	No	No	No	No	No	No	No		Yes	No	No	No	No	3.09	16.13	12.18	208	4.48	123	28.7	35.1	12	33.9	9.9	13.8	4.75	2.62	Yes	Yes	No	No
No	Fem	64	155	50	80	No	Yes	No	No	Yes	No	4	X	0	T4NXM0		[cT4NxM0]	Yes	No	No	No	No	No	No	No		No	No	No	No	No	3.02	2.51	6.97	259	3.97	124	41.1	49.9	12.4	25.9	2.57	0.9	0.17	5.27	No	No	No	No
No	Mal	54	170	77	80	No	No	No	No	Yes	No							No	No	No	No	No	No	No	No		No	No	No	No	No	1.32	10.68	6.09	172	4.63	143	42.3	42.1	9.9	26.1	2.86	1.4	0.09	4.66	Yes	No	No	No
No	Mal	34	168	50	80	No	No	No	No	Yes	No	3	0	0	T3N0M0	Ⅱ		No	No	No	No	No	No	No	No		No	No	No	No	No	1.07	6.49	5.31	200	4.92	146	47.14	48.6	10.4	27.6	4.4	<2.50	<0.19		Yes	No	No	No
No	Mal	67	168	65	90	No	No	No	No	Yes	Yes	3	1	0	T3N1M0	Ⅲ	[pT3N1M0G3ⅢB期]	No	Yes	No	No	Yes	No	No	No		No	No	Yes	No	No	3.48	21.85	6.24	118	3.59	111	36	58.2	11.7	23.7	2.59	2.1	0.28	3.56	Yes	No	No	No
No	Fem	56	152	46	90	No	No	No	No	Yes	No	4	1	1	T4N1M1	Ⅳ	[cT4N1M1Ⅳ期]	No	No	Yes	No	Yes	No	No	No		Yes	No	Yes	No	No	1.94	8.23	7.11	273	3.86	118	34.3	64.2	13.4	29.1	4.1	12.8	4.34	2.78	Yes	Yes	No	No
No	Mal	53	166	61.5	80	No	No	No	No	No	Yes	X	1	X	TXN1MX		[cTxN1Mx]	Yes	Yes	Yes	No	Yes	No	No	No		Yes	No	Yes	No	No	8.88	55.46	5.03	387	3.17	73	35.2	79.5	11.2	25.2	2.98	1.8	0.49	2.01	Yes	Yes	No	No
No	Mal	58	160	61	90	No	No	No	No	Yes	No	4	2	0	T4N2M0	Ⅲ		No	No	No	No	Yes	No	No	No		No	No	Yes	No	Yes	2.01	10.19	5.46	265	5.32	165	42.6	86.8	10.4	22.7	4.51	2	0.45	3.55	Yes	No	No	No
No	Mal	36	176	60	90	No	No	No	No	Yes	Yes	3	1	1	T3N1M1	Ⅲ		No	No	No	No	Yes	No	No	No		Yes	No	Yes	No	No	2.13		6.37	270	5.73	106	39.38	75.1	10.9	27.1	3.12	1.3	0.17	2.88	Yes	Yes	No	No
No	Mal	74	154	53	70	No	No	No	No	Yes	Yes	4	1	0	T4N1M0	Ⅲ	[pT4aN1M0]	No	No	No	No	No	No	No	No		No	No	Yes	No	No	0.55	33.48	4.6	149	3.72	118	37.97	81	11.1	25.2	3.93	8.6	0.29	4.5	Yes	No	No	No
No	Fem	78	158	55	90	No	Yes	No	Yes	Yes	Yes	4	3	1	T4N3M1	Ⅳ		No	Yes	No	No	Yes	No	No	No		No	No	Yes	No	No	3.03	524.35	10.4	223	4.48	129	42.36	131.4	11.2	20.5	3.12	14	9.39	3.65	Yes	No	No	No
No	Fem	45	165	67	70	No	No	No	No	Yes	Yes	1	0	0	T1N0M0	Ⅰ	[pT1aN0M0]	No	No	No	No	No	No	No	No		No	No	Yes	No	No	<0.50	26.23	4.5	268	3.97	122	39.2	46.2	11.5	25.7	1.79	1	0.17	4.09	Yes	No	No	No
No	Mal	63	160	48	80	No	No	No	No	Yes	No	X	1	X	TXN1MX			No	No	No	No	No	No	No	No		No	No	No	No	No	2.4	3.07	9.18	178	4.31	130	41.72	72.1	12.4	31.2	2.64	2	0.33	2.73	Yes	No	No	No
No	Mal	57	163	58	90	No	No	No	No	No	Yes							No	No	No	No	Yes	No	No	No		No	No	Yes	No	No	2.5	11.09	4.96	340	3.51	88	46.63	69.1	12.4	27.4	2.98	5.5	1.01	6.31	Yes	No	No	No
No	Mal	64	156	58	80	No	No	No	No	Yes	No	无病理报告，无法分期						No	No	No	No	Yes	No	No	No		No	No	Yes	No	No	2.42	9.17	15.77	115	4.4	134	48.29	66	12.5	23.7	2.91	<2.50	0.42		Yes	No	No	No
No	Fem	52	170	75	90	No	Yes	No	No	Yes	Yes	1	1	0	T1N1M0	Ⅰ	[cT1N1M0IB期]	No	No	No	No	Yes	No	No	No		No	No	Yes	No	No	1.45	11.17	6.69	216	4.59	132	38.5	53.3	9.8	25.8	2.43	0.9	0.16	5.36	Yes	No	No	No
No	Mal	54	175	66	80	No	No	No	Yes	Yes	No	4	1	1	T4N1M1	Ⅳ		No	No	No	No	No	No	No	No		Yes	No	Yes	No	No	10.28	>700.00	6.77	104	4.38	139	35.6	43.3	12.4	28.4	3.31	42.3	>10.00	2.38	No	No	No	No
No	Mal	63	162	52.5	90	No	No	No	No	Yes	No	X	1	1	TXN1M1	Ⅳ	[cTxN1M1IV期]	No	Yes	No	No	Yes	No	No	No		Yes	No	No	No	No	14.51	25.1	5.35	85	2.74	111	35	49.6	13.1	32.4	3.23	2.3	0.39	4.07	Yes	Yes	No	No
No	Mal	56	162	51	70	No	No	No	Yes	Yes	No	X	X	1	TXNXM1	Ⅳ		No	No	No	No	No	No	No	No		No	No	No	No	No	<0.50	526.67	6.55	256	4.55	132	39.2	51	10	25.2	3.39	2.1	0.5	4.4	Yes	No	No	No
No	Fem	72	149	47	80	No	No	No	No	Yes	No	X	X	X	TXNXMX			No	No	No	No	No	No	No	No		No	No	No	No	No	1.24	11.33	5.09	173	4.6	140	51.18	77.6	11.3	28.3	2.55	0.8	0.19		Yes	No	No	No
No	Mal	82	165	50	80	No	Yes	No	No	Yes	No	3	2	0	T3N2M0	Ⅱ	[cT3N2M0IIa期]	No	No	No	No	No	No	No	No		No	No	No	No	No	5.91	>700.00	6.93	221	4.56	140	40.3	72.8	13	28.5	2.84	2.5	0.35		Yes	No	No	No
No	Mal	61	154	55	90	No	Yes	No	No	Yes	Yes	3	1	0	T3N1M0	Ⅲ		No	No	No	No	No	No	No	No		No	No	No	No	No	1.01	7.91	4.31	127	4.41	142	42.42	75.1	11.9	25.6	2.98	1.7	0.3	4.77	Yes	No	No	No
No	Mal	71	167	70	90	No	Yes	No	Yes	Yes	No	4	X	X	T4NXMX			No	No	No	No	No	No	No	No		Yes	No	No	No	No	1.86	7.62	4.68	164	4.83	131	60.6	78.2	9.8	18.7	3.24	7	2.16	6.41	Yes	Yes	No	No
No	Mal	55	177	72	80	No	Yes	No	No	Yes	No	4	X	1	T4NXM1	Ⅳ		No	No	No	No	No	No	No	No		No	No	No	No	No	4.39	10.81	5.22	144	3.76	103	39.32	68.9	12.1	23.7	3.24	1.5	0.28		No	No	No	No
No	Fem	64	158	82	70	No	Yes	No	No	Yes	No							No	No	No	No	No	No	No	No		Yes	No	No	No	No	1.59	15.49	5.89	169	3.81	126	40.5	79.9	10.9	24.2	3.24	1.1	0.3	4.45	No	Yes	No	No
No	Mal	64	170	61	90	No	No	No	No	Yes	Yes	4	2	0	T4N2M0	Ⅲ	[pT4bN2M0]	No	Yes	Yes	No	No	No	Yes	No		No	No	Yes	No	No	0.8	10.86	4.97	148	4.49	140	41.85	62.8	10.4	25.3	2.33	1.7	0.18	3.98	Yes	No	No	No
No	Fem	43	155	38	80	No	No	No	No	Yes	No							No	No	No	No	Yes	No	No	No		No	No	No	No	No	3.61	27.38	4.3	174	4.14	98	45.53	56.9	11.9	26.2	2.65	1.6	0.33	3.6	Yes	No	No	No
No	Fem	63				No	No	No	No	Yes	Yes	4	X	1	T4NXM1	Ⅳ	[pT4NXM1Ⅳ期]	Yes	No	No	No	Yes	No	No	Yes		No	No	Yes	No	No	1.36	3.61	4.4	204	4.23	130	35.8	50.2	10.9	26.1	3.58	2.7	0.56		Yes	No	No	No
No	Mal	73	163	62	80	No	Yes	No	No	Yes	Yes	3	0	0	T3N0M0	Ⅲ	[cT3N0M0III期]	Yes	Yes	Yes	No	Yes	No	No	No		No	No	No	No	No	1.24	8.95	7.77	264	1.9	49	28.4	72.1	10.7	25.9	2.89	5.1	1.21	2.82	No	No	No	No
No	Mal	64	170	53	70	No	Yes	No	No	Yes	No	0	0	1	T0N0M1	Ⅳ		No	No	No	No	No	No	Yes	No		No	No	No	No	No	2.64	14.15	5.67	166	3.31	122	37.5	67.6	10.8	24	2.36	2.5	0.46		Yes	No	No	No
No	Fem	52	160	60	90	No	No	No	No	Yes	Yes	4	2	1	T4N2M1	Ⅳ	[cT4N2M1IV期]	No	No	No	No	No	No	No	No		No	No	Yes	No	No	1.26	18.23	4.59	206	4.6	124	42.4	70.6	11	26.4	2.42	2	0.4	4.67	Yes	No	No	No
No	Mal	63	168	60	90	No	No	No	No	Yes	Yes	4	1	0	T4N1M0	Ⅲ	[pT4aN1M0IIIa期]	No	No	Yes	No	Yes	No	No	No		No	No	Yes	No	No	2.79	4.91	6.54	340	4.08	137	40	49.9	10.3	26.5	3.12	1.2	0.17		Yes	No	No	No
No	Mal	63	165	59	70	No	No	No	No	Yes	No	4	X	1	T4NXM1	Ⅳ		No	No	No	No	No	No	No	No		Yes	No	Yes	No	No	4.67	158.45	5.61	254	4.22	130	38.3	71.7	11	23.7	3.01	3.8	1.34	4.28	No	Yes	No	No
No	Mal	49	165	69	80	No	Yes	No	No	Yes	Yes	4	2	0	T4N2M0	Ⅲ	[pT4aN3bM0Ⅲc期]	No	No	No	No	Yes	No	No	No		No	No	Yes	No	No	0.79	7.41	6.15	249	5.54	163	43.8	65.7	9.9	23.7	2.36	0.7	0.06	5.59	Yes	No	No	No
No	Fem	44	171	45	90	No	No	No	No	Yes	No	4	3	1	T4N3M1	Ⅳ	[rcT4N3M1IV期]	No	No	No	No	Yes	No	No	No		No	No	No	Yes	No	3.8	16.89	4.96	231	4	109	36.2	34.6	11.5	23.9	2.48	11.1	3.49	0.4	No	No	No	No
No	Mal	63	171	68	80	No	Yes	No	Yes	Yes	No	X	X	X	TXNXMX		[cTxNxMx]	No	No	No	No	Yes	No	No	No		No	No	No	No	No	5.98	35.73	7.6	196	3.42	105	40.6	178.1	10.9	26.1	3.95	3.2	0.77	4.85	No	No	No	No
No	Mal	60	167	61	80	No	No	No	No	No	No	1	0	0	T1N0M0	Ⅰ	[cT1N0M0I期]	No	No	No	No	No	No	No	No		No	No	Yes	No	No	3.09	29.01	3.94	99	4.4	137	48.46	73.3	11	22.4	1.93	0.9	0.27		Yes	No	No	No
No	Fem	68	165	66	90	No	No	No	No	No	No	1	0	0	T1N0M0	Ⅰ	[cT1N0M0I期]	No	No	No	No	No	No	No	No		No	No	No	No	No	1.29	9.79	8.71	247	4.34	136	46.6	56	11.4	22.5	2.84	1.9	0.62	4.75	Yes	No	No	No
No	Mal	64	167	50	90	No	Yes	No	No	Yes	Yes	4	2	1	T4N2M1	Ⅳ		No	No	No	No	Yes	No	No	No		Yes	No	Yes	No	No	>100.00	>700.00	8.78	226	3.53	88	36.3	70.9	10.8	26.2	2.33	24.7	6.9		Yes	Yes	No	No
No	Mal	57	173	54	80	No	No	No	No	No	No	1	0	0	T1N0M0	Ⅰ	[PT1N0M0Ia期]	No	No	No	No	Yes	No	No	No		No	No	No	No	No	4.17	10.04	6.16	213	3.94	117	44.1	65.4	11.3	26.2	2.36	0.9	0.1		Yes	No	No	No
No	Fem	77	150	51	80	No	Yes	No	Yes	Yes	Yes	4	2	0	T4N2M0	Ⅲ	[pT4bN2M0]	No	No	No	No	Yes	No	No	No		No	No	Yes	No	No	2.06	4.13	4.1	234	2.69	63	30.1	66.6	11.4	26.2	3.8	1.9	0.43		Yes	No	No	No
No	Mal	78	165	56	80	No	Yes	No	No	Yes	No					Ⅳ		No	No	No	No	Yes	No	No	No		No	No	No	No	No	1.71	6.37	7.13	361	3.15	92	34.9	73.1	13.4	27.7	3.23	7.3	1.76	4.46	Yes	No	No	No
No	Mal	80	170	45	70	No	No	No	No	Yes	No							No	No	No	No	No	No	No	No		No	No	No	No	No	3.49	22.37	4.87	171	4.05	124	36.4	62.2	10.9	27.5	3	1.6	0.35	3.53	No	No	No	No
No	Mal	55	160	65	90	No	No	No	No	No	No					Ⅲ		No	Yes	Yes	No	Yes	No	No	No		No	No	Yes	No	No	0.97	15.9	4.38	183	4.82	148	43.9	71.5	10.5	22.3	2.11	1.5	0.24	3.5	Yes	No	No	No
No	Mal	55	173	71	90	No	No	No	No	No	No	is	0	0	TisN0M0			No	No	No	No	No	No	No	No		No	No	No	No	No	2.66	37.39	6.56	191	4.84	155	48.36	85.3	10.6	25.3	2.16	2.5	0.59		Yes	No	No	No
No	Mal	62	168	52.5	80	No	No	No	No	Yes	No	3	X	X	T3NXMX	Ⅳ		No	No	Yes	No	Yes	No	No	No		No	No	No	No	No	79.92	20.85	3.82	196	3.88	101	30.1	45.8	11.3	36.8	5.1	3.1	0.86	3.36	No	No	No	No
No	Mal	68	1.55	60	70	No	Yes	No	No	Yes	No	X	X	1	TXNXM1	Ⅳ	[TxNxM1IV期]	No	No	No	No	No	No	No	No		No	No	No	No	No	13.5	>700.00	4.52	260	5.02	159	45.98	78.9	10.4	20.9	2.4	10.9	3.01	5.4	Yes	No	No	No
No	Mal	68	172	69	80	No	No	No	No	Yes	Yes	3	1	1	T3N1M1	Ⅳ	[cT3N1M1IV期]	No	No	No	No	Yes	No	No	No		Yes	No	Yes	No	No	2.39	5.52	4.48	356	3.55	71	36.3	61.5	13	24.3	3.18	1.7	0.33		Yes	Yes	No	No
No	Mal	50	170	55	70	No	No	No	No	Yes	No	4	X	1	T4NXM1	Ⅳ	[T4bNxM1IV期]	No	No	No	No	No	No	No	No		Yes	No	No	No	No	1.68	399.44	6.64	174	4.05	122	32.44	76.2							Yes	No	No	No
No	Fem	62	158	60	90	No	No	No	No	No	Yes					Ⅰ		No	Yes	Yes	No	Yes	No	No	No		No	No	No	No	No	0.8	9.81	6.24	284	4.6	143	44.49	50.6	10.7	24.2	2.97	<2.50	0.24	5.74	Yes	No	No	No
No	Fem	72	147	49	80	No	Yes	No	No	Yes	No	4	0	0	T4N0M0	Ⅲ	[cT4N0M0IIIB期]	Yes	No	No	No	Yes	No	No	No		No	No	No	No	No	2.37	10.95	6.19	314	3.98	100	41.2	58.8	10.7	21.4	3.5	6.4	1.61	6.22	No	No	No	No
No	Fem	60	155	56	90	No	No	No	No	Yes	No					Ⅰ		No	No	Yes	No	No	No	No	No		Yes	No	Yes	No	No	0.66	12.66	4.01	207	4.68	119	44.37	55	12.5	30.8	4.38	3.6	1.75	5.26	No	No	No	No
No	Mal	73	165	60	80	No	No	No	No	Yes	No							No	No	No	No	Yes	No	No	No		No	No	No	No	No	1.43	4.08	4.82	429	3.09	88	44.16	70	12.4	29	2.93	3.5	0.6	4.45	Yes	No	No	No
Yes	Fem	56	157	43.5	90	Yes	Yes	No	Yes	No	No	4	3	0	T4N3M0	Ⅲ	[T4aN3bM0III期]	No	No	No	No	No	No	No	No		Yes	No	Yes	No	No	2.98	146.88	5.89	129	4.14	117	36.9	55.3	11.2	23.1	2.84	3.6	0.84	4.15	Yes	No	No	No
No	Mal	59	170	69	70	No	No	No	No	Yes	No	4	X	1	T4NXM1	Ⅳ	[cT4bNxM1IV期]	No	No	No	No	No	No	No	No		No	No	Yes	No	No	4.4	>700.00	10.86	190	4.8	140	31.8	53.2	12.5	30.5	2.55	35.3	>10.00	3.82	Yes	No	No	Yes
No	Mal	44	169	60	70	No	No	No	No	Yes	No	4	3	0	T4N3M0	Ⅲ	[pT4aN3bM0IIIC期]	No	No	No	No	No	No	No	No		No	No	No	No	No	1.9	18.64	4.04	203	4.07	119	37.4	62.9	13.3	28.1	1.98	3.7	0.81		No	No	No	No
No	Mal	59	161	68.5	90	No	No	No	No	No	No					Ⅲ		No	No	No	No	No	No	No	No		No	No	No	No	No	1.62	6.55	4.1	160	3.89	117	42.09	82.1	13.2	27.9	1.98	2.5	0.47	3.71	No	No	No	No
No	Mal	61	159	55	70	No	No	No	No	No	No	2	2	0	T2N2M0	Ⅲ	[pT2N2M0IIIA期]	No	No	No	No	Yes	No	No	No		Yes	No	No	No	No	3.64	12.58	4.44	368	2.98	84	31.6	53.2	13.1	24.6	2.51	7.8	2.51	3.43	No	No	No	No
No	Mal	65	172	55	70	No	No	No	No	Yes	No	4	3	0	T4N3M0	Ⅲ	[T4aN3bM0Ⅲc期]	No	No	Yes	No	Yes	No	Yes	No		Yes	Yes	No	No	No	2.39	20.81	4.44	208	3.49	113	33.3	64	12	22.7	1.89	5.6	1.13		No	No	No	No
No	Fem	61	150	57	90	No	No	No	No	No	No							No	No	No	No	No	No	No	No		No	No	No	No	No	0.59	21.81	4.75	112	4.03	121	39.6	51	11.3	23.9	2.73	1.7	0.3	4.63	Yes	No	No	No
No	Fem	64	150	45.5	90	No	No	No	No	No	No							No	No	No	No	No	No	No	No		No	No	No	No	No			6.18	102	4.31	122	44.3	46	11.8	24.1	3.06	1.4	0.15		Yes	No	No	No
No	Fem	54	145	49	90	No	No	No	No	Yes	Yes	4	1	0	T4N1M0	Ⅲ	[pT4aN1M0IIIa期]	No	No	Yes	No	Yes	No	Yes	No		No	No	Yes	No	No	1.31	218.03	3.83	197	2.6	63	43	49.8	11.9	22.6	3.8	1.3	0.29	4.75	Yes	No	No	No
No	Mal	65	168	72.5	80	No	No	No	No	Yes	Yes	4	0	0	T4N0M0	Ⅱ	[pT4aN0M0IIb期]	No	No	No	No	Yes	No	No	No		No	No	Yes	No	No	1	10.29	5.86	246	4.5	134	45.3	60.1	10.5	23.1	3.12	1.4	0.18	5.37	Yes	No	No	No
No	Mal	56	171	59	80	No	No	No	No	Yes	No	3	0	0	T3N0M0	Ⅱ	[pT3N0M0IIA期]	No	No	No	No	No	No	No	No		Yes	No	Yes	No	No	1.16	12.55	5	186	4.08	130	46.3	63.9	12.9	29.6	2.64	1.2	0.21	5.5	No	No	Yes	No
No	Fem	46	157	45	80	No	No	No	No	Yes	Yes	4	3	0	T4N3M0	Ⅲ	[cT4bN3M0III期]	Yes	No	No	No	Yes	No	No	No		Yes	No	Yes	No	No	2.42	6.55	7.28	500	3.12	61	22.7	37.1	13.1	31	3.98	11.3	3.06		Yes	No	No	No
No	Fem	48	148	54	90	No	No	No	No	No	No							No	No	No	No	No	No	No	No		No	No	No	No	No	1.65	8.82	7.46	295	4.57	145	46.9	45.2	11.8	29.7	1.89	0.6	0.15	4.6	Yes	No	No	No
No	Mal	64	157	53	90	No	No	No	No	No	No							No	No	No	No	No	No	No	No		No	No	No	No	No	1.72	27.1	3.56	115	4.35	138	44.8	76.1	11.8	26.5	2.02	1.3	0.12	5.36	Yes	No	No	No
No	Mal	51	165	66	90	No	No	No	No	No	No							No	No	No	No	No	No	No	No		No	No	No	No	No			3.35	209	4.77	153	46.54	78.3	11.3	26.5	2	1	0.06	5	Yes	No	No	No
No	Fem	47	166	68	80	No	No	No	No	Yes	No	4	3	1	T4N3M1	Ⅳ	[cT4bN3M1Ⅳ期]	No	No	No	No	Yes	No	No	No		Yes	No	Yes	No	No	1.12	13.46	6.61	241	4.36	96	32.7	44	14	25.8	3.61	5.3	1.31		Yes	No	No	No
No	Mal	67	164	52	90	No	No	No	No	Yes	No	3	3	1	T3N3M1	Ⅳ	[cT3N3M1GxⅣB期]	No	No	No	No	No	No	No	No		No	No	No	No	No	1.26	>700.00	3.41	151	2.85	99	32.8	68.2	12.7	27	2.4	4.4	0.98	4.52	No	No	No	No
No	Fem	63	148	44	80	No	Yes	No	No	Yes	Yes	1	0	0	T1N0M0	Ⅰ	[pT1bN0M0IA期]	No	No	No	No	Yes	No	No	No		Yes	No	Yes	No	No	0.77	13.79	3.57	163	4.07	119	38.2	45.6	12.5	25.5	1.29	1.5	0.18	5.28	Yes	No	No	No
No	Fem	62	158	46.1	80	No	No	No	No	No	No	0		0	T0M0	Ⅱ		No	No	No	No	No	No	No	No		No	No	Yes	No	No	1.03	19.58	4.4	303	4.04	125	38	49.6	10.9	24.4	4.65	2.2	0.43		Yes	No	No	No
No	Mal	55	168	79	70	No	No	No	No	Yes	No	4	1	1	T4N1M1	Ⅳ	[T4N1M1Ⅳ期]	Yes	No	No	No	Yes	No	No	No		No	No	No	No	No	2.93	222.48	4.52	210	3.75	128	44.1	40	12.8	30.8	2.64	2.3	0.43		No	No	No	No
No	Fem	71	147	46	80	No	Yes	No	No	Yes	No	4	X	1	T4NXM1	Ⅳ	[T4NxM1IV期]	No	No	Yes	No	Yes	No	No	No		No	No	No	No	No	17.08	11.31	8.1	362	4.05	116	33.5	65.4	10.8	21.5	4.67	3.6	0.74	5.26	Yes	No	No	No
No	Mal	70	165	68	80	No	Yes	No	Yes	No	No							No	No	No	No	No	No	No	No		No	No	No	No	No	<0.50	6.51	4.61	409	3.31	78	43.74	62.9	11.7	39.2	2.47	1.4	0.11			No	No	No
No	Fem	46	150	30	40	No	No	No	No	Yes	No							Yes	No	No	No	Yes	No	Yes	No		No	No	No	No	No			3.86	214	3.64	103	37.84	37.3	11.8	35.3	3.07	6.9	1.88			No	No	No
No	Mal	59	160	50	90	No	No	No	No	Yes	Yes							No	No	Yes	No	Yes	No	No	No		No	No	Yes	No	No	1.95	6.11	5.58	303	3.68	111	34.2	63.4	11.7	30.8	3.83	2.7	0.56	3.32	Yes	No	No	No
No	Mal	66	167	75	90	No	No	No	No	No	Yes	2	0	0	T2N0M0	Ⅱ		No	No	Yes	No	Yes	No	No	No		No	No	Yes	No	Yes	<0.50	9.41	5.68	146	5.01	153	40.4	66.9	11.3	22.5	1.93	7.2	2.31	5.32	Yes	No	No	No
No	Mal	77	167	51	80	No	No	No	No	Yes	No	X	X	1	TXNXM1	Ⅳ	[cTxNxM1Ⅳ期]	Yes	No	No	No	Yes	No	No	No		No	No	No	No	No	2.04	40.73	4.34	106	2.05	80	41.2	70.9	12.9	34.5	3.93	3.7	0.69		No	No	No	No
No	Mal	47	158	56	80	No	No	No	No	Yes	Yes	3	1	0	T3N1M0	Ⅲ		No	Yes	Yes	No	Yes	No	No	No		No	No	Yes	No	No	7.77	10.18	5.11	144	4.97	127	36.4	85.6	11.5	40.8	2.3	0.9	0.12	3.34	Yes	No	No	No
No	Mal	70	163	58	90	No	No	No	No	Yes	No	1	0	0	T1N0M0	Ⅰ		No	Yes	No	No	No	No	No	No		No	No	Yes	No	No	1.3	7.48	5.18	192	4.34	136	42.91	59.4	11	30.6	2.23	0.5	0.11	5.12	Yes	No	No	No
No	Mal	65	170	65	80	No	No	No	No	Yes	No	1	0	0	T1N0M0	Ⅰ	[pT1aN0M0IA期]	No	No	No	No	No	No	No	No		No	No	Yes	No	No	1.05	12.93	6.46	156	5.02	155	44.1	83.7	12.8	29.3	2.35	1.1	0.09	5.41	Yes	No	No	No
No	Mal	56	169	69	80	No	No	No	No	Yes	No	4	2	0	T4N2M0	Ⅲ	[pT4aN2M0ⅢA期]	No	No	Yes	No	Yes	No	No	No		Yes	No	No	No	No	0.84	6.45	3.66	194	3.34	79	55.6	58.4	11.9	33.5	2.11	2.1	0.44	3.16	No	No	No	No
No	Fem	56	152	52	80	No	No	No	No	No	Yes	2	0	0	T2N0M0	Ⅱ		No	No	No	No	No	No	No	No		No	No	No	No	No	0.62	9.5	4.95	233	4.58	143	43.5	52.3	10.9	24.3	2.03	4.2	0.95		Yes	No	No	No
No	Fem	66	150	42	80	No	No	No	No	Yes	Yes							No	No	No	No	No	No	No	No		No	No	Yes	No	No	1.76	31.21	3.94	198	3.84	114	35.2	45.6	11.4	27.1	1.89	2.7	0.52		Yes	No	No	No
No	Mal	75			60	No	No	No	No	Yes	No							Yes	No	No	No	No	No	No	No		No	No	No	No	No	16.6	4227.7	11.13	351	2.59	75	31.1	75.9	13.2	31.6	4.72	2.4	0.31		No	No	No	No
No	Mal	74	176	57.5	90	No	Yes	No	No	Yes	No	4	2	1	T4N2M1	Ⅳ		No	No	No	No	No	No	No	No		No	No	No	No	No	1.51		4.69	158	3.61	107	34.36	50.4	12.7	30.1	2.76	2.6	0.41	2.55	Yes	No	No	No
No	Mal	64	156	49	90	No	No	Yes	No	Yes	No	3	1	0	T3N1M0	Ⅲ	[Ⅳ期cTxNxM1]	No	No	No	No	No	No	No	No		No	No	No	No	No			6.37	286	3.75	106	35.7	49.6	11.9	32.2	3.24	1.9	0.25	3.91	No	No	No	No
No	Fem	47	149	45	60	No	Yes	No	No	Yes	No	X	X	1	TXNXM1	Ⅳ		No	No	No	No	Yes	No	No	No		Yes	No	Yes	No	No	308.6	5.83	6.54	350	3.58	99	30.9	76.9	13.5	30.7	4.54	8.2	2.3	5.77	Yes	No	No	No
No	Mal	66	175	61.5	90	No	No	No	No	Yes	Yes	4	2	0	T4N2M0	Ⅲ	[pT4aN2M0IIIb期]	No	No	Yes	No	No	No	Yes	No		No	No	Yes	No	No	6.24		6.7	295	2.9	93	32.3	64.1	11.8	27.9	3.74	4.8	1.16	4.16	Yes	No	No	No
No	Mal	62	160	50	80	No	No	No	No	Yes	No	4	0	0	T4N0M0	Ⅱ	[pT4N0M0IIB期]	No	No	No	No	No	No	No	No		No	No	No	No	No	1.24	14.93	6.45	178	4.61	154	44.21	74	13	27.1	2.55	2.1	0.2		Yes	No	No	No
No	Mal	74	159	60	90	No	No	No	No	Yes	No							Yes	Yes	Yes	No	Yes	No	No	No		No	No	No	No	No	1.6	5.03	4.86	187	3.72	126	42.74	63.7	11.6	25.9	7.65	<2.50	0.45	4.68	Yes	Yes	No	No
No	Fem	62	160	55	90	No	No	No	No	No	No							No	No	No	No	No	No	No	No		No	No	No	No	No	1.08	27.35	4.28	152	5.06	157	46.2	73.4	12.1	27.6	3.16	2	0.37	4.54	Yes	No	No	No
No	Mal	52	162	60	80	No	No	No	No	Yes	No							No	No	No	No	No	No	No	No		Yes	No	No	No	No	3.89	5.58	5.77	217	4.41	144	39	60.8	11	23.6	2.33	1.1	0.37	4.97	No	No	No	No
Yes	Mal	81	178	66	80	No	No	No	No	Yes	No	4	0	1	T4N0M1	Ⅳ	[Ⅳ期pT4N0M1]	No	Yes	Yes	No	Yes	No	No	No		Yes	No	Yes	No	No	2.08	83.54	11.38	294	3.61	109	34.58	77.7	12.1	27.6	3.39	48.3	>10.00	4.26	Yes	No	No	Yes
No	Mal	70	165	56	80	No	No	No	No	Yes	No	4	0	0	T4N0M0	Ⅲ	[pT4bN0M0IIIB期]	No	No	Yes	No	Yes	No	No	No		Yes	No	Yes	No	No	0.86	10.91	3.33	174	3.77	83	36.5	72.5	12	26.1	2.33	10.6	2.61	3.41	No	No	No	No
No	Fem	66	148	44	80	No	No	No	No	No	No	X	X	X	TXNXMX	Ⅱ		Yes	No	No	No	Yes	No	No	No		No	No	No	No	No	0.8	11.99	8.68	529	3.74	107	37.34	53.9	11.5	27.1	2.46	5.1	16.56	4.93	Yes	No	No	No
No	Mal	56	160	56.5	90	No	No	No	No	No	Yes	3	0	0	T3N0M0	Ⅱ	[cT3N0M0II期]	No	No	No	No	No	No	No	No		No	No	No	No	Yes	2.34	4.99	8.58	136	6.83	136	48.6	78.8	11.5	27.1	3.23	0.8	0.1		Yes	No	No	No
No	Fem	65	150	35	70	No	No	No	Yes	Yes	No	4	3	1	T4N3M1	Ⅳ	[pT4bN3M1IV期]	No	No	No	No	Yes	No	Yes	No		Yes	No	Yes	No	No	2.68	14.01	5.45	227	3.41	108	35.5	43.2	12.4	25.1	4.14	7.8	1.98	4.76	Yes	No	No	No
No	Mal	67	155	54	80	No	No	No	No	Yes	Yes	3	1	0	T3N1M0	Ⅱ	[pT3N1M0ⅡB期]	No	No	No	No	No	No	No	No		No	No	Yes	No	No	3.48	36.4	6.09	223	5.07	152	42.3	91	10.3	28.2	3.31	4.1	1.05		Yes	No	No	No
No	Fem	51	165	54.5	90	No	No	No	No	Yes	No	1	2	1	T1N2M1	Ⅳ	[pT1bN2M1Ⅳ期]	No	No	Yes	No	Yes	No	No	No		Yes	No	Yes	No	Yes	0.86	15.42	5.51	172	4.71	132	49.61	53	11.4	27.6	2.64	0.9	0.06	6.29	No	No	No	No
No	Fem	64	162	51	80	No	No	No	No	No	No							No	No	No	No	No	No	No	No		No	No	No	No	No	1.38	4.38	3.55	218	4.41	132	43.32	59.9	10.8	29.1	2.1	0.9	0.12	5.04	Yes	No	No	No
No	Fem	30	162	42	70	No	No	No	No	No	No	4	X	1	T4NXM1	Ⅳ	[rT4NxM1IV期]	No	No	No	No	No	No	Yes	No		No	No	No	No	No	<0.50	22.09	5.99	301	3.63	102	38.8	44.4	11.9	30.2	2.51	4.1	2.25	2.64	Yes	No	No	No
No	Mal	72			70	No	No	No	No	No	Yes	4	X	X	T4NXMX	Ⅲ		Yes	No	No	No	Yes	No	No	No		No	No	Yes	No	No	0.57	9.86	9.23	281	1.42	35	31.83	69.7	12.2	24.5	2.1	5.8	1.93		Yes	No	No	No
No	Mal	77	166	60	80	No	Yes	No	Yes	Yes	Yes	4	1	1	T4N1M1	Ⅳ	[cT4N1M1cP1c]	No	No	No	No	Yes	No	No	No		Yes	No	No	No	No	1.37	547.57	6.15	163	4.72	131	37.7	75.4	11	31.6	2.6	2.2	0.87		Yes	No	No	No
No	Fem	82			50	No	Yes	No	No	Yes	No	4	0	1	T4N0M1	Ⅳ	[cT4N0M1]	No	No	No	No	Yes	No	No	No		No	No	No	No	No	4	44.13	5.7	187	3.49	104	41.5	95.4	11.9	22.8	2.89	6.1	1.77	3.24	Yes	No	No	No
No	Mal	57	162	53.5	90	No	No	No	No	Yes	Yes	4	0	0	T4N0M0	Ⅱ	[PT4aN0M0IIB期]	No	No	Yes	No	Yes	No	No	No		No	No	Yes	No	No	1.42	9.4	2.53	280	2.24	71	33.2	50.4	9.6	22.7	3.15	3.2	0.99	3.73	Yes	No	No	No
No	Fem	55	157	43	80	No	No	No	Yes	Yes	No	X	X	1	TXNXM1	Ⅳ		Yes	No	No	No	Yes	No	No	No		No	No	No	No	No	4.06	30.37	7	313	3.75	105	40.23	34.9	11.3	26.3	4.84	1.7	0.34	11.61	Yes	No	Yes	No
No	Mal	70	168	60	80	No	No	No	No	Yes	No	4	1	0	T4N1M0	Ⅲ		No	No	Yes	No	Yes	No	No	No		Yes	No	Yes	No	No	1.9	9.43	6.54	480	4.13	115	38.21	90.9	10.5	26	6.53	0.8	0.19	7.12	Yes	No	No	No
No	Mal	67	160	45	80	No	No	No	Yes	Yes	No	3	2	1	T3N2M1	Ⅳ	[pT3N2M1GxⅣb期]	No	No	No	No	Yes	No	No	No		No	No	No	No	No	1.48	69.98	4.26	230	3.47	106	36.9	89.6	10.8	28.8	3.32	1.8	0.33	3.3	Yes	No	No	No
No	Mal	79	153	47	70	No	Yes	No	No	Yes	No	2	1	1	T2N1M1	Ⅳ	[T2bN1M1IV期]	No	No	No	No	No	No	No	No		No	No	No	No	No	62.03	339.72	5.96	222	3.35	104	34.4	43.8	11.5	27.8	3.26	12.8	3.77		No	No	No	No
No	Mal	67	176	72	90	No	Yes	No	No	No	No	1	0	0	T1N0M0	Ⅰ	[T1NOMOI期]	No	No	No	No	No	No	No	No		No	No	No	No	No	1.19	30.97	5.96	192	4.31	125	37.9	89.8	10	25.6	2.92	2.7	0.59		Yes	No	No	No
No	Fem	48	148	48.5	90	No	No	No	No	No	No							No	No	Yes	No	No	No	No	No		No	No	No	No	No	<0.50	12.24	1.94	101	4.62	124	42	57.5	10.4	27.3	2.82	2	0.82	4.71	No	No	No	No
No	Mal	68	151	38.5	80	No	No	No	Yes	Yes	Yes	0	3	1	T0N3M1	Ⅳ	[yT0N3M1IV期]	No	No	No	No	No	No	No	No		No	No	No	No	No	1317	64.28	6.65	118	3.9	128	38.3	45.7	16.4	31.9	0.47	21.4	8.03		No	No	No	No
No	Mal	65	160	56	90	No	No	No	No	No	Yes	4	0	0	T4N0M0			No	No	No	No	Yes	No	No	No		No	No	Yes	No	No	1.48	11.01	5.63	214	4.53	133	39	54.5	11	27.5	4.53	2.3	0.69	4.93	Yes	No	No	No
No	Mal	63	165	60	90	No	No	No	No	Yes	Yes	4	3	0	T4N3M0	Ⅲ	[pT3N3aM0IIIb期]	No	No	No	No	No	No	No	No		No	No	Yes	No	No	1.78	18.04	5.14	200	3.99	111	39.73	71.8	10.8	27.2	2.03	1.1	0.27		Yes	No	No	No
No	Mal	65	164	64.5	90	No	No	No	No	Yes	Yes	4	0	0	T4N0M0	Ⅱ	[pT4aN0M0IIB期]	No	No	Yes	No	Yes	No	No	No		No	No	Yes	No	No	1.42	11.97	6.14	97	4.82	166	45.8	61.9	11.2	27.6	2.29	2.2	0.54	3.82	Yes	No	No	No
No	Mal	70	160	47	60	No	No	No	No	Yes	No	4	X	X	T4NXMX			No	No	No	No	No	No	Yes	No		No	No	No	No	No	260.1	1971.8	5.46	445	4.05	119	32.2	103.3	10.5	24.2	6.53	2.8	0.78	5.19	Yes	No	No	No
Yes	Mal	69	161	54	80	No	No	No	No	Yes	No	4	X	1	T4NXM1	Ⅳ		No	Yes	Yes	No	Yes	No	Yes	No		No	No	Yes	No	No	62.33	>700.00	4.59	169	3.26	115	31.8	40.1	12.6	27.3	2.7	30.6	9.52	2.18	Yes	No	No	Yes
No	Mal	63	157	42	60	No	No	No	No	Yes	Yes	4	2	0	T4N2M0	Ⅲ	[cT4aN2M0ⅢB期]	No	No	No	No	Yes	No	No	No		No	No	No	No	No	17.25	139.33	7.88	416	2.68	74	31.81	50.6	13.6	39.2	3.05	3.1	0.8		Yes	No	No	No
No	Mal	75	160	47.5	80	No	No	No	No	Yes	No							No	No	No	No	No	No	No	No		No	No	No	No	No	3.64	20.26	6.64	230	4.1	126	40.91	59.4	10.7	26.8	3.43	1.7	0.53		No	No	No	No
No	Mal	51				No	Yes	No	No	Yes	No					Ⅳ		No	No	Yes	No	Yes	No	No	No		No	No	No	No	No	10.09	44191	1.42	81	2.33	70	28.4	75.6	12.2	26.5	5.9	56.8	>10.00		No	No	No	No
No	Fem	67	152	38	80	No	No	No	No	No	No	4	3	1	T4N3M1	Ⅳ	[cT4bN3bM1]	No	No	No	No	Yes	No	Yes	No		No	No	No	No	No	1.06	4.05	6.05	373	4.16	105	33.3	24	12.4	27.1	2.79	7.1	1.76		Yes	No	No	No
No	Mal	83	165	75.5	80	No	Yes	No	No	No	No	3	X	0	T3NXM0	Ⅳ	[T3NxM0IV期]	No	Yes	Yes	No	No	No	No	No		No	No	Yes	No	No	1.82	7.61	3.45	120	3.8	105	44.02	99.8	12.1	24.8	2.12	5.7	1.66	2.68	Yes	No	No	No
No	Mal	62	170	53	70	No	No	No	No	Yes	No	4	X	1	T4NXM1	Ⅳ	[T4bNxM1IV期]	No	No	No	No	Yes	No	No	No		No	No	No	No	No	36.7	17.48	5.23	326	3.85	85	34.3	65.9	11.9	27.5	3.13	6.4	1.29	3.89	Yes	No	No	No
No	Mal	55	165	52	90	No	No	No	No	Yes	Yes	4	2	1	T4N2M1	Ⅳ	[cT4NM1IV期]	No	No	No	No	No	No	Yes	Yes		No	No	Yes	No	Yes	2.15	467.19	6.47	286	4.01	115	44.6	69.4	11.8	23.7	2.51	3.6	0.95	5.19	Yes	No	Yes	No
No	Fem	71	160	50	80	No	No	No	No	Yes	Yes	4	2	0	T4N2M0	Ⅲ	[cT4bN2M0]	No	No	No	No	No	No	No	No		Yes	No	Yes	No	No	<0.50	25.33	5.19	335	3.34	87	32.6	57.1	12.3	23.9	3.48	2.9	0.72	4	Yes	No	No	No
No	Mal	74	164	58	90	No	Yes	No	No	Yes	No	4	2	0	T4N2M0	Ⅲ	[cT4bN2M0ⅢC期]	No	No	No	No	Yes	No	No	No		No	No	Yes	No	No	1.42		6.47	80	4.74	89	34.1	74.8	12.9	25.1	3.56	4.1	0.99		Yes	No	No	No
No	Mal	65	155	61	80	No	No	No	No	Yes	No	x	x	0	TxNxM0			Yes	No	Yes	No	Yes	No	No	No		No	No	No	No	No	0.58	4.86	4.49	244	3.26	99	41.2	66.3	11	28	5.41	<2.50	0.47		Yes	Yes	No	No
No	Mal	66	170	44	70	No	No	No	No	Yes	No	2	1	1	T2N1M1	Ⅳ	[pT2N1M1IV期]	Yes	Yes	No	No	Yes	No	Yes	No		No	No	No	No	No	2.34	41.23	4.21	261	3.51	119	37.5	64.2	12.8	27.6	3.29	8.3	2.16		Yes	No	No	No
No	Fem	38	163	42	90	No	No	No	No	No	No							No	No	No	No	No	No	No	No		No	No	No	No	No	0.94	4.66	3.88	210	4.34	130	42.3	42.1	13.9	31.4	1.7	1.5	0.09		Yes	No	No	No
No	Fem	69	155	61	90	No	No	No	No	Yes	No	3	0	0	T3N0M0	Ⅱ	[II期cT3N0M0]	No	Yes	Yes	No	Yes	No	Yes	No		No	No	No	No	No	1.64	3.92	7.2	305	4.69	142	46.7	82.4	11.6	29.4	4.19	0.9	0.3	7.77	No	No	No	No
No	Fem	67	152	61	90	No	No	No	No	No	Yes							Yes	No	No	No	Yes	No	No	No		No	No	Yes	No	No	<0.50	11.31	6.78	355	2.82	77	38.5	58.5	12.8	23.4	2.66	3.7	1.11	1.08	Yes	No	No	No
No	Mal	81			60	No	No	No	No	Yes	No	3	2	1	T3N2M1	Ⅳ	[T3N2M1Ⅳ期]	No	No	No	No	Yes	No	Yes	No		No	No	No	No	No	4.51	127.36	6.04	254	3.34	93	32.88	42.7	13.1	28.2	2.94	4.1	1.08		Yes	No	No	No
No	Mal	67	163	56	70	No	No	No	No	No	No	X	X	0	TXNXM0		[cTxNxM0]	No	No	No	No	Yes	No	No	No		No	No	No	No	No	3.37	14.05	4.41	150	4.29	120	36	66.2	13.8	31.9	1.91	4.2	1.05	3.56	No	No	No	No
No	Mal	69	172	60	80	No	No	No	No	Yes	No	X	X	0	TXNXM0		[TxNxM0期]	No	No	No	No	No	No	No	No		Yes	No	No	No	No	3.02	12.22	8.86	245	4.29	127	44.56	76.1	11	27.3	5.79	3.8	0.98		No	No	No	No
No	Mal	59	170	50	80	No	No	No	No	Yes	Yes	4	1	1	T4N1M1	Ⅳ	[BorrmanIV型cT4N1M1P1]	No	No	No	No	Yes	No	No	No		Yes	No	Yes	No	No	2.07	12.73	5.01	231	1.98	66	34.9	52.9	12.7	24.5	2.07	4.5	0.92		Yes	No	No	No
No	Fem	65	158	57	90	No	No	No	No	Yes	No	1	X	0	T1NXM0	Ⅰ	[ⅠA期pT1bNxM0]	No	No	No	No	No	No	No	No		No	No	No	No	No			5.16	186	4.11	128	42.6	50.9	12.1	26.5	3.07	1.4	0.27	5.01	Yes	No	No	No
No	Mal	62	170	59	80	No	Yes	No	No	Yes	No	4	3	1	T4N3M1	Ⅳ	[BorrmannIV型T4aN3M1]	No	No	No	No	No	No	No	No		No	Yes	No	No	No	12.35	14.19	3.56	179	4.46	141	39.5	128.5	12.1	23.9	3.02	5.3	1.46		Yes	No	No	No
No	Mal	60	172	63	80	No	No	No	No	Yes	No	1	3	0	T1N3M0	Ⅱ	[T1N3M0IIB期]	No	No	No	No	No	No	No	No		No	No	No	No	No	6.69	12.79	4.1	98	3.14	95	33.4	86.3	13.1	31.1	2.28	4	1.08		No	No	No	No
No	Mal	70	156	53	80	No	Yes	No	No	Yes	No	X	0	1	TXN0M1	Ⅳ	[cTxN0M1Ⅳ期]	No	No	No	No	No	No	No	No		No	Yes	No	No	No	83.44	28.28	2.67	112	4.81	138	41.45	56.8	11.9	29.6	2.77	3.1	0.74	4.04	No	Yes	No	No
No	Mal	63	153	52	90	No	No	No	No	Yes	No	3	1	0	T3N1M0	Ⅲ		No	No	No	No	No	No	No	No		No	No	No	No	No	0.94		6.42	121	4.31	130	38.7	63	11.4	23.4	3.17	1.6	0.19		No	No	No	No
No	Mal	54	175	65	90	No	No	No	No	Yes	Yes	3	3	1	T3N3M1	Ⅳ		No	Yes	No	No	Yes	No	Yes	No		No	No	Yes	No	No	1.13	11.21	5.05	129	4.57	144	49.58	60	12.2	27.6	2.3	0.6	0.16	2.56	Yes	No	No	No
No	Mal	48	175	78	90	No	No	No	No	Yes	No	4	3	1	T4N3M1	Ⅳ	[T4NxM1]	No	No	No	No	No	No	No	No		Yes	Yes	No	No	No	0.63	8.54	4.68	173	4.39	115	40.25	71	10.8	27.9	2.52	0.1	0.05		No	No	No	No
No	Mal	75	155	50	80	No	Yes	No	No	Yes	Yes	3	1	0	T3N1M0	Ⅲ	[IIIA期cT3N1M0]	Yes	No	Yes	No	Yes	No	No	No		Yes	No	No	No	No	11.39	19.51	3.36	272	3.45	71	33.5	51.3	14	24.6	3.84	1.7	0.47	3.62	No	No	No	No
No	Fem	54	156	54	90	No	No	No	No	Yes	No							No	No	No	No	No	No	No	No		No	No	Yes	No	No	2.28		6.53	271	4.62	141	42.18	59.8	11.1	24.9	2.44	0.7	0.26	4.34	Yes	No	No	No
No	Mal	54	170	54	80	No	No	No	No	No	Yes							No	No	No	No	No	No	No	No		No	No	Yes	No	No	0.91	16.42	5.01	388	3.52	79	35.3	53.5	11.2	22.5	2.82	0.7	0.18		Yes	No	No	No
No	Mal	57	157	54	80	No	No	No	No	No	No	is	0	0	TisN0M0	Ⅰ		No	No	No	No	No	No	No	No		No	No	Yes	No	No	1.77	12.15	5.07	200	4.85	153	43.2	74.3	11.5	29	2.87	1.5	0.43	3.84	Yes	No	No	No
[truncated: 1,460 more rows]
[truncated: 1 more columns]
